# Supplementary material
Source: publisher figshare collection journal article supplement (https://acs.figshare.com/ndownloader/files/3012633)
Supplement: Supplementary file 1 [file 3012633]

data_UNNAMED
# 
loop_
_atom_site.group_PDB 
_atom_site.id 
_atom_site.auth_atom_id 
_atom_site.label_atom_id 
_atom_site.label_alt_id 
_atom_site.auth_comp_id 
_atom_site.label_comp_id 
_atom_site.pdbx_auth_comp_id 
_atom_site.auth_asym_id 
_atom_site.label_asym_id 
_atom_site.auth_seq_id 
_atom_site.label_seq_id 
_atom_site.pdbx_PDB_ins_code 
_atom_site.Cartn_x 
_atom_site.Cartn_y 
_atom_site.Cartn_z 
_atom_site.occupancy 
_atom_site.B_iso_or_equiv 
_atom_site.pdbx_PDB_model_num 
_atom_site.label_entity_id 
_atom_site.type_symbol 
_atom_site.pdbx_formal_charge 
ATOM   1    O    O    . ILE ILE ILE A A 13  13  . 91.870  1.926  55.453 1.00 126.08 1 . O  ?  
ATOM   2    N    N    . ILE ILE ILE A A 13  13  . 94.394  0.691  54.781 1.00 136.73 1 . N  ?  
ATOM   3    CA   CA   . ILE ILE ILE A A 13  13  . 94.195  2.136  54.879 1.00 136.80 1 . C  ?  
ATOM   4    C    C    . ILE ILE ILE A A 13  13  . 92.947  2.470  55.693 1.00 129.39 1 . C  ?  
ATOM   5    CB   CB   . ILE ILE ILE A A 13  13  . 94.111  2.782  53.483 1.00 130.62 1 . C  ?  
ATOM   6    CG1  CG1  . ILE ILE ILE A A 13  13  . 95.502  2.882  52.846 1.00 138.95 1 . C  ?  
ATOM   7    CG2  CG2  . ILE ILE ILE A A 13  13  . 93.453  4.148  53.575 1.00 118.06 1 . C  ?  
ATOM   8    CD1  CD1  . ILE ILE ILE A A 13  13  . 96.410  3.917  53.486 1.00 134.97 1 . C  ?  
ATOM   9    O    O    . VAL VAL VAL A A 14  14  . 92.086  6.040  56.731 1.00 123.41 1 . O  ?  
ATOM   10   N    N    . VAL VAL VAL A A 14  14  . 93.098  3.382  56.649 1.00 127.78 1 . N  ?  
ATOM   11   CA   CA   . VAL VAL VAL A A 14  14  . 92.017  3.783  57.544 1.00 125.60 1 . C  ?  
ATOM   12   C    C    . VAL VAL VAL A A 14  14  . 91.383  5.059  57.007 1.00 123.66 1 . C  ?  
ATOM   13   CB   CB   . VAL VAL VAL A A 14  14  . 92.535  3.989  58.978 1.00 126.73 1 . C  ?  
ATOM   14   CG1  CG1  . VAL VAL VAL A A 14  14  . 93.710  4.961  58.982 1.00 128.57 1 . C  ?  
ATOM   15   CG2  CG2  . VAL VAL VAL A A 14  14  . 91.420  4.485  59.881 1.00 122.76 1 . C  ?  
ATOM   16   O    O    . ARG ARG ARG A A 15  15  . 88.486  6.285  58.696 1.00 105.56 1 . O  ?  
ATOM   17   N    N    . ARG ARG ARG A A 15  15  . 90.039  5.051  56.852 1.00 118.72 1 . N  ?  
ATOM   18   CA   CA   . ARG ARG ARG A A 15  15  . 89.285  6.225  56.430 1.00 106.20 1 . C  ?  
ATOM   19   C    C    . ARG ARG ARG A A 15  15  . 88.630  6.898  57.633 1.00 107.84 1 . C  ?  
ATOM   20   CB   CB   . ARG ARG ARG A A 15  15  . 88.209  5.846  55.396 1.00 95.77  1 . C  ?  
ATOM   21   CG   CG   . ARG ARG ARG A A 15  15  . 88.300  4.448  54.768 1.00 95.12  1 . C  ?  
ATOM   22   CD   CD   . ARG ARG ARG A A 15  15  . 89.450  4.277  53.764 1.00 99.70  1 . C  ?  
ATOM   23   NE   NE   . ARG ARG ARG A A 15  15  . 89.472  5.304  52.724 1.00 94.03  1 . N  ?  
ATOM   24   CZ   CZ   . ARG ARG ARG A A 15  15  . 90.229  5.262  51.626 1.00 88.51  1 . C  ?  
ATOM   25   NH1  NH1  . ARG ARG ARG A A 15  15  . 91.027  4.231  51.398 1.00 84.69  1 . N  ?  
ATOM   26   NH2  NH2  . ARG ARG ARG A A 15  15  . 90.183  6.257  50.746 1.00 85.32  1 . N  ?  
ATOM   27   O    O    . PRO PRO PRO A A 16  16  . 85.574  7.720  58.061 1.00 100.74 1 . O  ?  
ATOM   28   N    N    . PRO PRO PRO A A 16  16  . 88.221  8.163  57.504 1.00 107.86 1 . N  ?  
ATOM   29   CA   CA   . PRO PRO PRO A A 16  16  . 87.610  8.888  58.628 1.00 101.02 1 . C  ?  
ATOM   30   C    C    . PRO PRO PRO A A 16  16  . 86.145  8.498  58.822 1.00 101.51 1 . C  ?  
ATOM   31   CB   CB   . PRO PRO PRO A A 16  16  . 87.751  10.353 58.214 1.00 94.49  1 . C  ?  
ATOM   32   CG   CG   . PRO PRO PRO A A 16  16  . 87.708  10.309 56.732 1.00 94.33  1 . C  ?  
ATOM   33   CD   CD   . PRO PRO PRO A A 16  16  . 88.382  9.023  56.318 1.00 96.10  1 . C  ?  
ATOM   34   O    O    . VAL VAL VAL A A 17  17  . 83.199  10.615 59.339 1.00 100.30 1 . O  ?  
ATOM   35   N    N    . VAL VAL VAL A A 17  17  . 85.529  9.083  59.866 1.00 102.18 1 . N  ?  
ATOM   36   CA   CA   . VAL VAL VAL A A 17  17  . 84.213  8.669  60.352 1.00 103.84 1 . C  ?  
ATOM   37   C    C    . VAL VAL VAL A A 17  17  . 83.105  9.405  59.600 1.00 104.71 1 . C  ?  
ATOM   38   CB   CB   . VAL VAL VAL A A 17  17  . 84.095  8.910  61.871 1.00 100.33 1 . C  ?  
ATOM   39   CG1  CG1  . VAL VAL VAL A A 17  17  . 85.388  8.541  62.579 1.00 92.75  1 . C  ?  
ATOM   40   CG2  CG2  . VAL VAL VAL A A 17  17  . 83.706  10.359 62.161 1.00 97.73  1 . C  ?  
ATOM   41   O    O    . ALA ALA ALA A A 18  18  . 79.426  9.290  60.494 1.00 94.27  1 . O  ?  
ATOM   42   N    N    . ALA ALA ALA A A 18  18  . 82.032  8.674  59.279 1.00 97.77  1 . N  ?  
ATOM   43   CA   CA   . ALA ALA ALA A A 18  18  . 80.881  9.239  58.579 1.00 97.19  1 . C  ?  
ATOM   44   C    C    . ALA ALA ALA A A 18  18  . 79.942  9.928  59.569 1.00 95.00  1 . C  ?  
ATOM   45   CB   CB   . ALA ALA ALA A A 18  18  . 80.141  8.149  57.807 1.00 84.91  1 . C  ?  
ATOM   46   O    O    . ASP ASP ASP A A 19  19  . 76.930  13.427 60.171 1.00 83.90  1 . O  ?  
ATOM   47   N    N    . ASP ASP ASP A A 19  19  . 79.709  11.228 59.364 1.00 88.56  1 . N  ?  
ATOM   48   CA   CA   . ASP ASP ASP A A 19  19  . 78.869  12.032 60.244 1.00 88.95  1 . C  ?  
ATOM   49   C    C    . ASP ASP ASP A A 19  19  . 77.738  12.754 59.517 1.00 87.34  1 . C  ?  
ATOM   50   CB   CB   . ASP ASP ASP A A 19  19  . 79.727  13.061 60.989 1.00 91.24  1 . C  ?  
ATOM   51   CG   CG   . ASP ASP ASP A A 19  19  . 80.694  13.777 60.063 1.00 99.04  1 . C  ?  
ATOM   52   OD1  OD1  . ASP ASP ASP A A 19  19  . 81.143  13.144 59.078 1.00 96.99  1 . O  ?  
ATOM   53   OD2  OD2  . ASP ASP ASP A A 19  19  . 81.000  14.966 60.314 1.00 100.35 1 . O  ?  
ATOM   54   O    O    . PHE PHE PHE A A 20  20  . 75.165  11.369 57.649 1.00 78.33  1 . O  ?  
ATOM   55   N    N    . PHE PHE PHE A A 20  20  . 77.661  12.638 58.192 1.00 83.44  1 . N  ?  
ATOM   56   CA   CA   . PHE PHE PHE A A 20  20  . 76.601  13.278 57.422 1.00 73.87  1 . C  ?  
ATOM   57   C    C    . PHE PHE PHE A A 20  20  . 75.265  12.601 57.685 1.00 74.62  1 . C  ?  
ATOM   58   CB   CB   . PHE PHE PHE A A 20  20  . 76.932  13.214 55.932 1.00 69.07  1 . C  ?  
ATOM   59   CG   CG   . PHE PHE PHE A A 20  20  . 78.144  14.010 55.547 1.00 72.01  1 . C  ?  
ATOM   60   CD1  CD1  . PHE PHE PHE A A 20  20  . 78.513  15.132 56.279 1.00 76.33  1 . C  ?  
ATOM   61   CD2  CD2  . PHE PHE PHE A A 20  20  . 78.912  13.643 54.458 1.00 70.67  1 . C  ?  
ATOM   62   CE1  CE1  . PHE PHE PHE A A 20  20  . 79.618  15.876 55.931 1.00 71.90  1 . C  ?  
ATOM   63   CE2  CE2  . PHE PHE PHE A A 20  20  . 80.027  14.385 54.102 1.00 70.32  1 . C  ?  
ATOM   64   CZ   CZ   . PHE PHE PHE A A 20  20  . 80.378  15.504 54.840 1.00 71.02  1 . C  ?  
ATOM   65   N    N    . SER SER SER A A 21  21  . 74.229  13.400 57.937 1.00 74.71  1 . N  ?  
ATOM   66   CA   CA   . SER SER SER A A 21  21  . 72.904  12.828 58.134 1.00 71.45  1 . C  ?  
ATOM   67   C    C    . SER SER SER A A 21  21  . 72.343  12.319 56.806 1.00 70.21  1 . C  ?  
ATOM   68   O    O    . SER SER SER A A 21  21  . 72.691  12.833 55.738 1.00 67.36  1 . O  ?  
ATOM   69   CB   CB   . SER SER SER A A 21  21  . 71.952  13.850 58.743 1.00 71.08  1 . C  ?  
ATOM   70   OG   OG   . SER SER SER A A 21  21  . 71.892  15.023 57.947 1.00 84.43  1 . O  ?  
ATOM   71   N    N    . PRO PRO PRO A A 22  22  . 71.485  11.301 56.844 1.00 69.21  1 . N  ?  
ATOM   72   CA   CA   . PRO PRO PRO A A 22  22  . 70.925  10.750 55.606 1.00 65.86  1 . C  ?  
ATOM   73   C    C    . PRO PRO PRO A A 22  22  . 69.827  11.646 55.041 1.00 66.23  1 . C  ?  
ATOM   74   O    O    . PRO PRO PRO A A 22  22  . 69.335  12.577 55.682 1.00 59.50  1 . O  ?  
ATOM   75   CB   CB   . PRO PRO PRO A A 22  22  . 70.361  9.396  56.046 1.00 61.88  1 . C  ?  
ATOM   76   CG   CG   . PRO PRO PRO A A 22  22  . 69.962  9.638  57.470 1.00 61.94  1 . C  ?  
ATOM   77   CD   CD   . PRO PRO PRO A A 22  22  . 70.990  10.591 58.038 1.00 63.99  1 . C  ?  
ATOM   78   N    N    . SER SER SER A A 23  23  . 69.447  11.333 53.806 1.00 66.83  1 . N  ?  
ATOM   79   CA   CA   . SER SER SER A A 23  23  . 68.390  12.062 53.124 1.00 56.07  1 . C  ?  
ATOM   80   C    C    . SER SER SER A A 23  23  . 67.097  12.029 53.930 1.00 63.16  1 . C  ?  
ATOM   81   O    O    . SER SER SER A A 23  23  . 66.518  10.959 54.159 1.00 69.45  1 . O  ?  
ATOM   82   CB   CB   . SER SER SER A A 23  23  . 68.176  11.471 51.733 1.00 55.28  1 . C  ?  
ATOM   83   OG   OG   . SER SER SER A A 23  23  . 66.898  11.831 51.226 1.00 66.64  1 . O  ?  
ATOM   84   N    N    . LEU LEU LEU A A 24  24  . 66.649  13.218 54.347 1.00 62.95  1 . N  ?  
ATOM   85   CA   CA   . LEU LEU LEU A A 24  24  . 65.363  13.399 55.013 1.00 58.68  1 . C  ?  
ATOM   86   C    C    . LEU LEU LEU A A 24  24  . 64.213  12.768 54.261 1.00 58.00  1 . C  ?  
ATOM   87   O    O    . LEU LEU LEU A A 24  24  . 63.171  12.489 54.865 1.00 63.87  1 . O  ?  
ATOM   88   CB   CB   . LEU LEU LEU A A 24  24  . 65.042  14.894 55.158 1.00 60.02  1 . C  ?  
ATOM   89   CG   CG   . LEU LEU LEU A A 24  24  . 65.667  15.715 56.279 1.00 65.99  1 . C  ?  
ATOM   90   CD1  CD1  . LEU LEU LEU A A 24  24  . 65.494  17.204 56.010 1.00 63.16  1 . C  ?  
ATOM   91   CD2  CD2  . LEU LEU LEU A A 24  24  . 65.032  15.310 57.606 1.00 65.40  1 . C  ?  
ATOM   92   N    N    . TRP TRP TRP A A 25  25  . 64.356  12.567 52.953 1.00 56.29  1 . N  ?  
ATOM   93   CA   CA   . TRP TRP TRP A A 25  25  . 63.192  12.443 52.086 1.00 57.97  1 . C  ?  
ATOM   94   C    C    . TRP TRP TRP A A 25  25  . 62.800  11.012 51.754 1.00 53.61  1 . C  ?  
ATOM   95   O    O    . TRP TRP TRP A A 25  25  . 61.668  10.789 51.315 1.00 56.76  1 . O  ?  
ATOM   96   CB   CB   . TRP TRP TRP A A 25  25  . 63.444  13.226 50.793 1.00 56.93  1 . C  ?  
ATOM   97   CG   CG   . TRP TRP TRP A A 25  25  . 63.828  14.619 51.107 1.00 57.64  1 . C  ?  
ATOM   98   CD1  CD1  . TRP TRP TRP A A 25  25  . 65.078  15.162 51.049 1.00 53.25  1 . C  ?  
ATOM   99   CD2  CD2  . TRP TRP TRP A A 25  25  . 62.961  15.650 51.596 1.00 54.39  1 . C  ?  
ATOM   100  NE1  NE1  . TRP TRP TRP A A 25  25  . 65.042  16.472 51.453 1.00 54.48  1 . N  ?  
ATOM   101  CE2  CE2  . TRP TRP TRP A A 25  25  . 63.753  16.801 51.790 1.00 54.00  1 . C  ?  
ATOM   102  CE3  CE3  . TRP TRP TRP A A 25  25  . 61.593  15.717 51.870 1.00 48.84  1 . C  ?  
ATOM   103  CZ2  CZ2  . TRP TRP TRP A A 25  25  . 63.221  18.006 52.252 1.00 48.64  1 . C  ?  
ATOM   104  CZ3  CZ3  . TRP TRP TRP A A 25  25  . 61.064  16.918 52.332 1.00 49.60  1 . C  ?  
ATOM   105  CH2  CH2  . TRP TRP TRP A A 25  25  . 61.882  18.043 52.522 1.00 49.73  1 . C  ?  
ATOM   106  N    N    . GLY GLY GLY A A 26  26  . 63.690  10.047 51.943 1.00 59.49  1 . N  ?  
ATOM   107  CA   CA   . GLY GLY GLY A A 26  26  . 63.364  8.691  51.538 1.00 53.18  1 . C  ?  
ATOM   108  C    C    . GLY GLY GLY A A 26  26  . 63.024  8.648  50.063 1.00 55.90  1 . C  ?  
ATOM   109  O    O    . GLY GLY GLY A A 26  26  . 63.787  9.113  49.209 1.00 59.92  1 . O  ?  
ATOM   110  N    N    . ASP ASP ASP A A 27  27  . 61.852  8.098  49.747 1.00 51.56  1 . N  ?  
ATOM   111  CA   CA   . ASP ASP ASP A A 27  27  . 61.443  7.910  48.361 1.00 51.45  1 . C  ?  
ATOM   112  C    C    . ASP ASP ASP A A 27  27  . 60.165  8.670  48.018 1.00 50.93  1 . C  ?  
ATOM   113  O    O    . ASP ASP ASP A A 27  27  . 59.530  8.358  47.007 1.00 48.99  1 . O  ?  
ATOM   114  CB   CB   . ASP ASP ASP A A 27  27  . 61.271  6.419  48.049 1.00 60.29  1 . C  ?  
ATOM   115  CG   CG   . ASP ASP ASP A A 27  27  . 62.602  5.716  47.675 1.00 72.17  1 . C  ?  
ATOM   116  OD1  OD1  . ASP ASP ASP A A 27  27  . 63.637  5.911  48.368 1.00 74.43  1 . O  ?  
ATOM   117  OD2  OD2  . ASP ASP ASP A A 27  27  . 62.611  4.955  46.675 1.00 73.60  1 . O  ?  
ATOM   118  N    N    . GLN GLN GLN A A 28  28  . 59.780  9.684  48.814 1.00 49.65  1 . N  ?  
ATOM   119  CA   CA   . GLN GLN GLN A A 28  28  . 58.521  10.381 48.532 1.00 45.10  1 . C  ?  
ATOM   120  C    C    . GLN GLN GLN A A 28  28  . 58.516  11.055 47.169 1.00 44.16  1 . C  ?  
ATOM   121  O    O    . GLN GLN GLN A A 28  28  . 57.440  11.382 46.662 1.00 45.83  1 . O  ?  
ATOM   122  CB   CB   . GLN GLN GLN A A 28  28  . 58.182  11.406 49.619 1.00 43.09  1 . C  ?  
ATOM   123  CG   CG   . GLN GLN GLN A A 28  28  . 59.208  12.479 49.928 1.00 43.42  1 . C  ?  
ATOM   124  CD   CD   . GLN GLN GLN A A 28  28  . 58.703  13.435 51.016 1.00 49.60  1 . C  ?  
ATOM   125  OE1  OE1  . GLN GLN GLN A A 28  28  . 59.193  13.434 52.152 1.00 52.91  1 . O  ?  
ATOM   126  NE2  NE2  . GLN GLN GLN A A 28  28  . 57.704  14.245 50.671 1.00 47.14  1 . N  ?  
ATOM   127  N    N    . PHE PHE PHE A A 29  29  . 59.678  11.220 46.545 1.00 46.32  1 . N  ?  
ATOM   128  CA   CA   . PHE PHE PHE A A 29  29  . 59.787  11.860 45.246 1.00 47.51  1 . C  ?  
ATOM   129  C    C    . PHE PHE PHE A A 29  29  . 60.010  10.881 44.106 1.00 50.56  1 . C  ?  
ATOM   130  O    O    . PHE PHE PHE A A 29  29  . 60.069  11.316 42.951 1.00 51.75  1 . O  ?  
ATOM   131  CB   CB   . PHE PHE PHE A A 29  29  . 60.930  12.887 45.256 1.00 44.98  1 . C  ?  
ATOM   132  CG   CG   . PHE PHE PHE A A 29  29  . 60.737  14.001 46.249 1.00 43.93  1 . C  ?  
ATOM   133  CD1  CD1  . PHE PHE PHE A A 29  29  . 59.690  14.898 46.104 1.00 45.57  1 . C  ?  
ATOM   134  CD2  CD2  . PHE PHE PHE A A 29  29  . 61.603  14.154 47.323 1.00 44.22  1 . C  ?  
ATOM   135  CE1  CE1  . PHE PHE PHE A A 29  29  . 59.503  15.937 47.022 1.00 48.16  1 . C  ?  
ATOM   136  CE2  CE2  . PHE PHE PHE A A 29  29  . 61.430  15.180 48.242 1.00 46.10  1 . C  ?  
ATOM   137  CZ   CZ   . PHE PHE PHE A A 29  29  . 60.376  16.074 48.093 1.00 45.48  1 . C  ?  
ATOM   138  N    N    . LEU LEU LEU A A 30  30  . 60.120  9.577  44.392 1.00 53.20  1 . N  ?  
ATOM   139  CA   CA   . LEU LEU LEU A A 30  30  . 60.580  8.625  43.380 1.00 52.26  1 . C  ?  
ATOM   140  C    C    . LEU LEU LEU A A 30  30  . 59.574  8.425  42.251 1.00 52.94  1 . C  ?  
ATOM   141  O    O    . LEU LEU LEU A A 30  30  . 59.968  8.140  41.115 1.00 55.01  1 . O  ?  
ATOM   142  CB   CB   . LEU LEU LEU A A 30  30  . 60.903  7.281  44.029 1.00 60.43  1 . C  ?  
ATOM   143  CG   CG   . LEU LEU LEU A A 30  30  . 61.564  6.226  43.136 1.00 60.87  1 . C  ?  
ATOM   144  CD1  CD1  . LEU LEU LEU A A 30  30  . 62.875  6.750  42.540 1.00 56.10  1 . C  ?  
ATOM   145  CD2  CD2  . LEU LEU LEU A A 30  30  . 61.815  4.964  43.937 1.00 62.54  1 . C  ?  
ATOM   146  N    N    . SER SER SER A A 31  31  . 58.283  8.550  42.523 1.00 50.16  1 . N  ?  
ATOM   147  CA   CA   . SER SER SER A A 31  31  . 57.284  8.343  41.482 1.00 55.33  1 . C  ?  
ATOM   148  C    C    . SER SER SER A A 31  31  . 56.231  9.431  41.581 1.00 58.66  1 . C  ?  
ATOM   149  O    O    . SER SER SER A A 31  31  . 55.608  9.612  42.630 1.00 56.21  1 . O  ?  
ATOM   150  CB   CB   . SER SER SER A A 31  31  . 56.640  6.960  41.597 1.00 60.15  1 . C  ?  
ATOM   151  OG   OG   . SER SER SER A A 31  31  . 56.363  6.662  42.950 1.00 69.48  1 . O  ?  
ATOM   152  N    N    . PHE PHE PHE A A 32  32  . 56.056  10.167 40.495 1.00 52.52  1 . N  ?  
ATOM   153  CA   CA   . PHE PHE PHE A A 32  32  . 55.004  11.154 40.397 1.00 52.18  1 . C  ?  
ATOM   154  C    C    . PHE PHE PHE A A 32  32  . 54.323  10.960 39.055 1.00 59.61  1 . C  ?  
ATOM   155  O    O    . PHE PHE PHE A A 32  32  . 54.944  11.153 38.001 1.00 59.67  1 . O  ?  
ATOM   156  CB   CB   . PHE PHE PHE A A 32  32  . 55.510  12.602 40.531 1.00 51.47  1 . C  ?  
ATOM   157  CG   CG   . PHE PHE PHE A A 32  32  . 54.417  13.609 40.268 1.00 49.07  1 . C  ?  
ATOM   158  CD1  CD1  . PHE PHE PHE A A 32  32  . 53.364  13.750 41.167 1.00 47.62  1 . C  ?  
ATOM   159  CD2  CD2  . PHE PHE PHE A A 32  32  . 54.378  14.325 39.087 1.00 48.33  1 . C  ?  
ATOM   160  CE1  CE1  . PHE PHE PHE A A 32  32  . 52.318  14.627 40.919 1.00 48.01  1 . C  ?  
ATOM   161  CE2  CE2  . PHE PHE PHE A A 32  32  . 53.330  15.205 38.825 1.00 51.99  1 . C  ?  
ATOM   162  CZ   CZ   . PHE PHE PHE A A 32  32  . 52.301  15.355 39.750 1.00 50.57  1 . C  ?  
ATOM   163  N    N    . SER SER SER A A 33  33  . 53.048  10.600 39.098 1.00 62.50  1 . N  ?  
ATOM   164  CA   CA   . SER SER SER A A 33  33  . 52.225  10.476 37.906 1.00 69.51  1 . C  ?  
ATOM   165  C    C    . SER SER SER A A 33  33  . 51.393  11.739 37.777 1.00 65.01  1 . C  ?  
ATOM   166  O    O    . SER SER SER A A 33  33  . 50.563  12.030 38.644 1.00 66.76  1 . O  ?  
ATOM   167  CB   CB   . SER SER SER A A 33  33  . 51.326  9.240  37.983 1.00 64.35  1 . C  ?  
ATOM   168  OG   OG   . SER SER SER A A 33  33  . 52.116  8.069  37.993 1.00 66.19  1 . O  ?  
ATOM   169  N    N    . ILE ILE ILE A A 34  34  . 51.621  12.489 36.703 1.00 64.03  1 . N  ?  
ATOM   170  CA   CA   . ILE ILE ILE A A 34  34  . 50.800  13.661 36.448 1.00 66.80  1 . C  ?  
ATOM   171  C    C    . ILE ILE ILE A A 34  34  . 49.362  13.220 36.194 1.00 72.62  1 . C  ?  
ATOM   172  O    O    . ILE ILE ILE A A 34  34  . 49.106  12.312 35.391 1.00 70.97  1 . O  ?  
ATOM   173  CB   CB   . ILE ILE ILE A A 34  34  . 51.370  14.462 35.270 1.00 64.93  1 . C  ?  
ATOM   174  CG1  CG1  . ILE ILE ILE A A 34  34  . 50.673  15.818 35.164 1.00 67.78  1 . C  ?  
ATOM   175  CG2  CG2  . ILE ILE ILE A A 34  34  . 51.226  13.682 33.979 1.00 66.42  1 . C  ?  
ATOM   176  CD1  CD1  . ILE ILE ILE A A 34  34  . 51.519  16.890 34.495 1.00 56.31  1 . C  ?  
ATOM   177  N    N    . LYS LYS LYS A A 35  35  . 48.417  13.830 36.923 1.00 74.19  1 . N  ?  
ATOM   178  CA   CA   . LYS LYS LYS A A 35  35  . 46.996  13.721 36.607 1.00 69.81  1 . C  ?  
ATOM   179  C    C    . LYS LYS LYS A A 35  35  . 46.727  14.539 35.354 1.00 68.40  1 . C  ?  
ATOM   180  O    O    . LYS LYS LYS A A 35  35  . 46.422  15.733 35.429 1.00 68.61  1 . O  ?  
ATOM   181  CB   CB   . LYS LYS LYS A A 35  35  . 46.119  14.212 37.764 1.00 70.58  1 . C  ?  
ATOM   182  CG   CG   . LYS LYS LYS A A 35  35  . 46.231  13.397 39.040 1.00 76.76  1 . C  ?  
ATOM   183  CD   CD   . LYS LYS LYS A A 35  35  . 45.377  14.006 40.145 1.00 85.02  1 . C  ?  
ATOM   184  CE   CE   . LYS LYS LYS A A 35  35  . 45.548  13.259 41.463 1.00 89.56  1 . C  ?  
ATOM   185  NZ   NZ   . LYS LYS LYS A A 35  35  . 44.839  13.961 42.573 1.00 87.26  1 . N  ?  
ATOM   186  N    N    . ASN ASN ASN A A 36  36  . 46.850  13.903 34.193 1.00 71.12  1 . N  ?  
ATOM   187  CA   CA   . ASN ASN ASN A A 36  36  . 46.901  14.660 32.953 1.00 69.63  1 . C  ?  
ATOM   188  C    C    . ASN ASN ASN A A 36  36  . 45.636  15.474 32.722 1.00 69.59  1 . C  ?  
ATOM   189  O    O    . ASN ASN ASN A A 36  36  . 45.682  16.497 32.031 1.00 70.79  1 . O  ?  
ATOM   190  CB   CB   . ASN ASN ASN A A 36  36  . 47.150  13.721 31.783 1.00 74.41  1 . C  ?  
ATOM   191  CG   CG   . ASN ASN ASN A A 36  36  . 47.780  14.427 30.618 1.00 83.30  1 . C  ?  
ATOM   192  OD1  OD1  . ASN ASN ASN A A 36  36  . 49.007  14.465 30.495 1.00 92.86  1 . O  ?  
ATOM   193  ND2  ND2  . ASN ASN ASN A A 36  36  . 46.952  15.023 29.765 1.00 80.76  1 . N  ?  
ATOM   194  N    N    . GLN GLN GLN A A 37  37  . 44.501  15.044 33.278 1.00 71.08  1 . N  ?  
ATOM   195  CA   CA   . GLN GLN GLN A A 37  37  . 43.274  15.823 33.135 1.00 68.73  1 . C  ?  
ATOM   196  C    C    . GLN GLN GLN A A 37  37  . 43.380  17.141 33.893 1.00 67.61  1 . C  ?  
ATOM   197  O    O    . GLN GLN GLN A A 37  37  . 43.016  18.201 33.370 1.00 64.79  1 . O  ?  
ATOM   198  CB   CB   . GLN GLN GLN A A 37  37  . 42.059  15.026 33.627 1.00 69.63  1 . C  ?  
ATOM   199  CG   CG   . GLN GLN GLN A A 37  37  . 42.283  13.527 33.753 1.00 79.89  1 . C  ?  
ATOM   200  CD   CD   . GLN GLN GLN A A 37  37  . 43.015  13.139 35.036 1.00 80.83  1 . C  ?  
ATOM   201  OE1  OE1  . GLN GLN GLN A A 37  37  . 42.672  13.609 36.131 1.00 74.43  1 . O  ?  
ATOM   202  NE2  NE2  . GLN GLN GLN A A 37  37  . 44.030  12.271 34.905 1.00 77.83  1 . N  ?  
ATOM   203  O    O    . VAL VAL VAL A A 38  38  . 44.584  20.462 35.024 1.00 56.87  1 . O  ?  
ATOM   204  N    N    . VAL VAL VAL A A 38  38  . 43.870  17.089 35.138 1.00 65.22  1 . N  ?  
ATOM   205  CA   CA   . VAL VAL VAL A A 38  38  . 44.027  18.306 35.932 1.00 66.69  1 . C  ?  
ATOM   206  C    C    . VAL VAL VAL A A 38  38  . 44.934  19.291 35.213 1.00 60.33  1 . C  ?  
ATOM   207  CB   CB   . VAL VAL VAL A A 38  38  . 44.566  17.972 37.333 1.00 66.96  1 . C  ?  
ATOM   208  CG1  CG1  . VAL VAL VAL A A 38  38  . 44.722  19.246 38.147 1.00 58.27  1 . C  ?  
ATOM   209  CG2  CG2  . VAL VAL VAL A A 38  38  . 43.648  16.972 38.031 1.00 64.33  1 . C  ?  
ATOM   210  N    N    . ALA ALA ALA A A 39  39  . 46.108  18.826 34.784 1.00 62.29  1 . N  ?  
ATOM   211  CA   CA   . ALA ALA ALA A A 39  39  . 47.033  19.694 34.067 1.00 58.62  1 . C  ?  
ATOM   212  C    C    . ALA ALA ALA A A 39  39  . 46.342  20.402 32.904 1.00 56.98  1 . C  ?  
ATOM   213  O    O    . ALA ALA ALA A A 39  39  . 46.398  21.631 32.786 1.00 58.59  1 . O  ?  
ATOM   214  CB   CB   . ALA ALA ALA A A 39  39  . 48.234  18.881 33.583 1.00 57.32  1 . C  ?  
ATOM   215  N    N    . GLU GLU GLU A A 40  40  . 45.663  19.647 32.044 1.00 61.51  1 . N  ?  
ATOM   216  CA   CA   . GLU GLU GLU A A 40  40  . 45.049  20.266 30.873 1.00 60.80  1 . C  ?  
ATOM   217  C    C    . GLU GLU GLU A A 40  40  . 43.961  21.256 31.265 1.00 58.42  1 . C  ?  
ATOM   218  O    O    . GLU GLU GLU A A 40  40  . 43.742  22.251 30.559 1.00 57.28  1 . O  ?  
ATOM   219  CB   CB   . GLU GLU GLU A A 40  40  . 44.492  19.193 29.942 1.00 64.05  1 . C  ?  
ATOM   220  CG   CG   . GLU GLU GLU A A 40  40  . 45.560  18.470 29.139 1.00 69.68  1 . C  ?  
ATOM   221  CD   CD   . GLU GLU GLU A A 40  40  . 44.997  17.331 28.308 1.00 83.37  1 . C  ?  
ATOM   222  OE1  OE1  . GLU GLU GLU A A 40  40  . 43.760  17.308 28.102 1.00 80.70  1 . O  ?  
ATOM   223  OE2  OE2  . GLU GLU GLU A A 40  40  . 45.790  16.460 27.866 1.00 85.65  1 . O  ?  
ATOM   224  N    N    . LYS LYS LYS A A 41  41  . 43.279  21.012 32.384 1.00 56.39  1 . N  ?  
ATOM   225  CA   CA   . LYS LYS LYS A A 41  41  . 42.287  21.967 32.866 1.00 54.30  1 . C  ?  
ATOM   226  C    C    . LYS LYS LYS A A 41  41  . 42.957  23.266 33.291 1.00 53.62  1 . C  ?  
ATOM   227  O    O    . LYS LYS LYS A A 41  41  . 42.560  24.355 32.857 1.00 54.86  1 . O  ?  
ATOM   228  CB   CB   . LYS LYS LYS A A 41  41  . 41.504  21.346 34.019 1.00 56.86  1 . C  ?  
ATOM   229  CG   CG   . LYS LYS LYS A A 41  41  . 40.478  22.242 34.646 1.00 56.22  1 . C  ?  
ATOM   230  CD   CD   . LYS LYS LYS A A 41  41  . 40.002  21.651 35.960 1.00 61.43  1 . C  ?  
ATOM   231  CE   CE   . LYS LYS LYS A A 41  41  . 39.014  22.575 36.660 1.00 75.43  1 . C  ?  
ATOM   232  NZ   NZ   . LYS LYS LYS A A 41  41  . 37.832  22.906 35.809 1.00 69.70  1 . N  ?  
ATOM   233  N    N    . TYR TYR TYR A A 42  42  . 43.992  23.161 34.134 1.00 56.39  1 . N  ?  
ATOM   234  CA   CA   . TYR TYR TYR A A 42  42  . 44.799  24.320 34.511 1.00 50.07  1 . C  ?  
ATOM   235  C    C    . TYR TYR TYR A A 42  42  . 45.309  25.061 33.286 1.00 48.13  1 . C  ?  
ATOM   236  O    O    . TYR TYR TYR A A 42  42  . 45.138  26.280 33.164 1.00 50.17  1 . O  ?  
ATOM   237  CB   CB   . TYR TYR TYR A A 42  42  . 45.977  23.881 35.382 1.00 50.74  1 . C  ?  
ATOM   238  CG   CG   . TYR TYR TYR A A 42  42  . 45.627  23.494 36.806 1.00 52.91  1 . C  ?  
ATOM   239  CD1  CD1  . TYR TYR TYR A A 42  42  . 44.295  23.378 37.235 1.00 54.35  1 . C  ?  
ATOM   240  CD2  CD2  . TYR TYR TYR A A 42  42  . 46.633  23.251 37.727 1.00 52.36  1 . C  ?  
ATOM   241  CE1  CE1  . TYR TYR TYR A A 42  42  . 43.993  23.032 38.554 1.00 52.62  1 . C  ?  
ATOM   242  CE2  CE2  . TYR TYR TYR A A 42  42  . 46.343  22.907 39.038 1.00 56.15  1 . C  ?  
ATOM   243  CZ   CZ   . TYR TYR TYR A A 42  42  . 45.034  22.801 39.448 1.00 57.70  1 . C  ?  
ATOM   244  OH   OH   . TYR TYR TYR A A 42  42  . 44.804  22.465 40.760 1.00 63.53  1 . O  ?  
ATOM   245  N    N    . ALA ALA ALA A A 43  43  . 45.937  24.345 32.359 1.00 48.15  1 . N  ?  
ATOM   246  CA   CA   . ALA ALA ALA A A 43  43  . 46.503  25.028 31.202 1.00 49.51  1 . C  ?  
ATOM   247  C    C    . ALA ALA ALA A A 43  43  . 45.435  25.819 30.464 1.00 49.77  1 . C  ?  
ATOM   248  O    O    . ALA ALA ALA A A 43  43  . 45.655  26.969 30.069 1.00 48.59  1 . O  ?  
ATOM   249  CB   CB   . ALA ALA ALA A A 43  43  . 47.164  24.025 30.265 1.00 46.53  1 . C  ?  
ATOM   250  N    N    . LYS LYS LYS A A 44  44  . 44.266  25.214 30.271 1.00 54.90  1 . N  ?  
ATOM   251  CA   CA   . LYS LYS LYS A A 44  44  . 43.233  25.868 29.485 1.00 50.92  1 . C  ?  
ATOM   252  C    C    . LYS LYS LYS A A 44  44  . 42.739  27.132 30.172 1.00 51.74  1 . C  ?  
ATOM   253  O    O    . LYS LYS LYS A A 44  44  . 42.592  28.173 29.523 1.00 52.70  1 . O  ?  
ATOM   254  CB   CB   . LYS LYS LYS A A 44  44  . 42.081  24.904 29.216 1.00 57.98  1 . C  ?  
ATOM   255  CG   CG   . LYS LYS LYS A A 44  44  . 40.796  25.601 28.765 1.00 65.99  1 . C  ?  
ATOM   256  CD   CD   . LYS LYS LYS A A 44  44  . 40.212  24.972 27.506 1.00 73.70  1 . C  ?  
ATOM   257  CE   CE   . LYS LYS LYS A A 44  44  . 38.700  24.940 27.587 1.00 71.90  1 . C  ?  
ATOM   258  NZ   NZ   . LYS LYS LYS A A 44  44  . 38.289  24.126 28.766 1.00 82.40  1 . N  ?  
ATOM   259  N    N    . GLU GLU GLU A A 45  45  . 42.477  27.077 31.486 1.00 48.33  1 . N  ?  
ATOM   260  CA   CA   . GLU GLU GLU A A 45  45  . 42.056  28.314 32.141 1.00 47.27  1 . C  ?  
ATOM   261  C    C    . GLU GLU GLU A A 45  45  . 43.185  29.335 32.148 1.00 52.81  1 . C  ?  
ATOM   262  O    O    . GLU GLU GLU A A 45  45  . 42.941  30.540 31.986 1.00 50.89  1 . O  ?  
ATOM   263  CB   CB   . GLU GLU GLU A A 45  45  . 41.565  28.078 33.571 1.00 45.25  1 . C  ?  
ATOM   264  CG   CG   . GLU GLU GLU A A 45  45  . 40.859  29.345 34.103 1.00 50.27  1 . C  ?  
ATOM   265  CD   CD   . GLU GLU GLU A A 45  45  . 40.355  29.250 35.544 1.00 54.99  1 . C  ?  
ATOM   266  OE1  OE1  . GLU GLU GLU A A 45  45  . 40.529  28.177 36.185 1.00 50.29  1 . O  ?  
ATOM   267  OE2  OE2  . GLU GLU GLU A A 45  45  . 39.781  30.267 36.024 1.00 48.85  1 . O  ?  
ATOM   268  N    N    . ILE ILE ILE A A 46  46  . 44.425  28.864 32.342 1.00 49.35  1 . N  ?  
ATOM   269  CA   CA   . ILE ILE ILE A A 46  46  . 45.585  29.750 32.374 1.00 48.02  1 . C  ?  
ATOM   270  C    C    . ILE ILE ILE A A 46  46  . 45.662  30.570 31.098 1.00 48.91  1 . C  ?  
ATOM   271  O    O    . ILE ILE ILE A A 46  46  . 46.013  31.756 31.125 1.00 47.80  1 . O  ?  
ATOM   272  CB   CB   . ILE ILE ILE A A 46  46  . 46.876  28.936 32.599 1.00 48.62  1 . C  ?  
ATOM   273  CG1  CG1  . ILE ILE ILE A A 46  46  . 46.992  28.512 34.065 1.00 47.06  1 . C  ?  
ATOM   274  CG2  CG2  . ILE ILE ILE A A 46  46  . 48.099  29.721 32.139 1.00 47.88  1 . C  ?  
ATOM   275  CD1  CD1  . ILE ILE ILE A A 46  46  . 48.157  27.577 34.334 1.00 47.57  1 . C  ?  
ATOM   276  N    N    . GLU GLU GLU A A 47  47  . 45.354  29.949 29.958 1.00 51.50  1 . N  ?  
ATOM   277  CA   CA   . GLU GLU GLU A A 47  47  . 45.411  30.664 28.687 1.00 53.81  1 . C  ?  
ATOM   278  C    C    . GLU GLU GLU A A 47  47  . 44.446  31.838 28.698 1.00 54.96  1 . C  ?  
ATOM   279  O    O    . GLU GLU GLU A A 47  47  . 44.789  32.956 28.305 1.00 59.26  1 . O  ?  
ATOM   280  CB   CB   . GLU GLU GLU A A 47  47  . 45.091  29.707 27.538 1.00 57.43  1 . C  ?  
ATOM   281  CG   CG   . GLU GLU GLU A A 47  47  . 45.848  30.006 26.256 1.00 69.51  1 . C  ?  
ATOM   282  CD   CD   . GLU GLU GLU A A 47  47  . 47.327  29.604 26.332 1.00 77.36  1 . C  ?  
ATOM   283  OE1  OE1  . GLU GLU GLU A A 47  47  . 47.622  28.493 26.843 1.00 79.13  1 . O  ?  
ATOM   284  OE2  OE2  . GLU GLU GLU A A 47  47  . 48.190  30.401 25.883 1.00 69.55  1 . O  ?  
ATOM   285  N    N    . ALA ALA ALA A A 48  48  . 43.234  31.603 29.178 1.00 55.07  1 . N  ?  
ATOM   286  CA   CA   . ALA ALA ALA A A 48  48  . 42.263  32.675 29.273 1.00 50.72  1 . C  ?  
ATOM   287  C    C    . ALA ALA ALA A A 48  48  . 42.756  33.765 30.211 1.00 46.62  1 . C  ?  
ATOM   288  O    O    . ALA ALA ALA A A 48  48  . 42.699  34.956 29.885 1.00 50.71  1 . O  ?  
ATOM   289  CB   CB   . ALA ALA ALA A A 48  48  . 40.920  32.104 29.740 1.00 50.44  1 . C  ?  
ATOM   290  N    N    . LEU LEU LEU A A 49  49  . 43.212  33.376 31.401 1.00 47.03  1 . N  ?  
ATOM   291  CA   CA   . LEU LEU LEU A A 49  49  . 43.673  34.370 32.365 1.00 49.77  1 . C  ?  
ATOM   292  C    C    . LEU LEU LEU A A 49  49  . 44.899  35.108 31.848 1.00 50.85  1 . C  ?  
ATOM   293  O    O    . LEU LEU LEU A A 49  49  . 45.065  36.305 32.118 1.00 48.45  1 . O  ?  
ATOM   294  CB   CB   . LEU LEU LEU A A 49  49  . 43.975  33.699 33.703 1.00 44.50  1 . C  ?  
ATOM   295  CG   CG   . LEU LEU LEU A A 49  49  . 42.786  32.996 34.349 1.00 43.66  1 . C  ?  
ATOM   296  CD1  CD1  . LEU LEU LEU A A 49  49  . 43.278  31.898 35.256 1.00 41.63  1 . C  ?  
ATOM   297  CD2  CD2  . LEU LEU LEU A A 49  49  . 41.942  33.989 35.118 1.00 35.88  1 . C  ?  
ATOM   298  N    N    . LYS LYS LYS A A 50  50  . 45.754  34.417 31.087 1.00 47.65  1 . N  ?  
ATOM   299  CA   CA   . LYS LYS LYS A A 50  50  . 46.923  35.065 30.505 1.00 51.07  1 . C  ?  
ATOM   300  C    C    . LYS LYS LYS A A 50  50  . 46.525  36.239 29.628 1.00 53.85  1 . C  ?  
ATOM   301  O    O    . LYS LYS LYS A A 50  50  . 47.131  37.315 29.703 1.00 57.49  1 . O  ?  
ATOM   302  CB   CB   . LYS LYS LYS A A 50  50  . 47.733  34.063 29.694 1.00 51.00  1 . C  ?  
ATOM   303  CG   CG   . LYS LYS LYS A A 50  50  . 49.006  34.634 29.140 1.00 56.69  1 . C  ?  
ATOM   304  CD   CD   . LYS LYS LYS A A 50  50  . 49.733  33.600 28.300 1.00 55.00  1 . C  ?  
ATOM   305  CE   CE   . LYS LYS LYS A A 50  50  . 49.823  32.275 29.006 1.00 50.92  1 . C  ?  
ATOM   306  NZ   NZ   . LYS LYS LYS A A 50  50  . 50.656  31.340 28.196 1.00 61.83  1 . N  ?  
ATOM   307  N    N    . GLU GLU GLU A A 51  51  . 45.513  36.057 28.783 1.00 55.44  1 . N  ?  
ATOM   308  CA   CA   . GLU GLU GLU A A 51  51  . 45.121  37.146 27.897 1.00 55.76  1 . C  ?  
ATOM   309  C    C    . GLU GLU GLU A A 51  51  . 44.485  38.293 28.676 1.00 53.70  1 . C  ?  
ATOM   310  O    O    . GLU GLU GLU A A 51  51  . 44.733  39.467 28.371 1.00 53.12  1 . O  ?  
ATOM   311  CB   CB   . GLU GLU GLU A A 51  51  . 44.190  36.626 26.805 1.00 60.13  1 . C  ?  
ATOM   312  CG   CG   . GLU GLU GLU A A 51  51  . 44.355  37.361 25.465 1.00 69.17  1 . C  ?  
ATOM   313  CD   CD   . GLU GLU GLU A A 51  51  . 45.806  37.363 24.945 1.00 78.38  1 . C  ?  
ATOM   314  OE1  OE1  . GLU GLU GLU A A 51  51  . 46.593  36.430 25.284 1.00 72.72  1 . O  ?  
ATOM   315  OE2  OE2  . GLU GLU GLU A A 51  51  . 46.149  38.309 24.188 1.00 78.16  1 . O  ?  
ATOM   316  N    N    . GLN GLN GLN A A 52  52  . 43.682  37.984 29.699 1.00 49.07  1 . N  ?  
ATOM   317  CA   CA   . GLN GLN GLN A A 52  52  . 43.153  39.053 30.539 1.00 50.22  1 . C  ?  
ATOM   318  C    C    . GLN GLN GLN A A 52  52  . 44.285  39.862 31.149 1.00 51.21  1 . C  ?  
ATOM   319  O    O    . GLN GLN GLN A A 52  52  . 44.222  41.099 31.202 1.00 52.31  1 . O  ?  
ATOM   320  CB   CB   . GLN GLN GLN A A 52  52  . 42.260  38.493 31.645 1.00 49.11  1 . C  ?  
ATOM   321  CG   CG   . GLN GLN GLN A A 52  52  . 41.093  37.647 31.166 1.00 53.05  1 . C  ?  
ATOM   322  CD   CD   . GLN GLN GLN A A 52  52  . 40.231  37.147 32.316 1.00 54.10  1 . C  ?  
ATOM   323  OE1  OE1  . GLN GLN GLN A A 52  52  . 39.687  37.943 33.094 1.00 56.88  1 . O  ?  
ATOM   324  NE2  NE2  . GLN GLN GLN A A 52  52  . 40.103  35.825 32.434 1.00 53.76  1 . N  ?  
ATOM   325  N    N    . THR THR THR A A 53  53  . 45.324  39.172 31.628 1.00 50.76  1 . N  ?  
ATOM   326  CA   CA   . THR THR THR A A 53  53  . 46.472  39.851 32.211 1.00 48.04  1 . C  ?  
ATOM   327  C    C    . THR THR THR A A 53  53  . 47.184  40.700 31.165 1.00 51.60  1 . C  ?  
ATOM   328  O    O    . THR THR THR A A 53  53  . 47.516  41.866 31.413 1.00 48.97  1 . O  ?  
ATOM   329  CB   CB   . THR THR THR A A 53  53  . 47.427  38.824 32.829 1.00 50.91  1 . C  ?  
ATOM   330  OG1  OG1  . THR THR THR A A 53  53  . 46.776  38.161 33.917 1.00 50.83  1 . O  ?  
ATOM   331  CG2  CG2  . THR THR THR A A 53  53  . 48.701  39.498 33.349 1.00 46.09  1 . C  ?  
ATOM   332  N    N    . ARG ARG ARG A A 54  54  . 47.421  40.134 29.978 1.00 50.98  1 . N  ?  
ATOM   333  CA   CA   . ARG ARG ARG A A 54  54  . 48.044  40.913 28.918 1.00 49.88  1 . C  ?  
ATOM   334  C    C    . ARG ARG ARG A A 54  54  . 47.297  42.212 28.709 1.00 49.47  1 . C  ?  
ATOM   335  O    O    . ARG ARG ARG A A 54  54  . 47.881  43.298 28.782 1.00 50.74  1 . O  ?  
ATOM   336  CB   CB   . ARG ARG ARG A A 54  54  . 48.092  40.113 27.622 1.00 55.58  1 . C  ?  
ATOM   337  CG   CG   . ARG ARG ARG A A 54  54  . 48.936  40.755 26.541 1.00 54.40  1 . C  ?  
ATOM   338  CD   CD   . ARG ARG ARG A A 54  54  . 49.324  39.706 25.535 1.00 55.72  1 . C  ?  
ATOM   339  NE   NE   . ARG ARG ARG A A 54  54  . 49.643  38.461 26.219 1.00 62.37  1 . N  ?  
ATOM   340  CZ   CZ   . ARG ARG ARG A A 54  54  . 49.747  37.280 25.617 1.00 69.19  1 . C  ?  
ATOM   341  NH1  NH1  . ARG ARG ARG A A 54  54  . 49.553  37.185 24.309 1.00 76.25  1 . N  ?  
ATOM   342  NH2  NH2  . ARG ARG ARG A A 54  54  . 50.035  36.192 26.320 1.00 60.07  1 . N  ?  
ATOM   343  N    N    . ASN ASN ASN A A 55  55  . 45.986  42.118 28.485 1.00 52.26  1 . N  ?  
ATOM   344  CA   CA   . ASN ASN ASN A A 55  55  . 45.197  43.312 28.214 1.00 52.71  1 . C  ?  
ATOM   345  C    C    . ASN ASN ASN A A 55  55  . 45.273  44.310 29.360 1.00 53.11  1 . C  ?  
ATOM   346  O    O    . ASN ASN ASN A A 55  55  . 45.164  45.523 29.129 1.00 57.23  1 . O  ?  
ATOM   347  CB   CB   . ASN ASN ASN A A 55  55  . 43.750  42.922 27.901 1.00 53.10  1 . C  ?  
ATOM   348  CG   CG   . ASN ASN ASN A A 55  55  . 43.642  42.098 26.634 1.00 56.36  1 . C  ?  
ATOM   349  OD1  OD1  . ASN ASN ASN A A 55  55  . 44.449  42.256 25.717 1.00 65.92  1 . O  ?  
ATOM   350  ND2  ND2  . ASN ASN ASN A A 55  55  . 42.667  41.195 26.583 1.00 55.38  1 . N  ?  
ATOM   351  N    N    . MET MET MET A A 56  56  . 45.478  43.843 30.593 1.00 48.34  1 . N  ?  
ATOM   352  CA   CA   . MET MET MET A A 56  56  . 45.755  44.794 31.664 1.00 52.75  1 . C  ?  
ATOM   353  C    C    . MET MET MET A A 56  56  . 47.040  45.568 31.375 1.00 53.48  1 . C  ?  
ATOM   354  O    O    . MET MET MET A A 56  56  . 47.072  46.804 31.459 1.00 52.85  1 . O  ?  
ATOM   355  CB   CB   . MET MET MET A A 56  56  . 45.847  44.073 33.007 1.00 51.18  1 . C  ?  
ATOM   356  CG   CG   . MET MET MET A A 56  56  . 44.532  43.566 33.552 1.00 49.42  1 . C  ?  
ATOM   357  SD   SD   . MET MET MET A A 56  56  . 44.702  42.644 35.099 1.00 53.58  1 . S  ?  
ATOM   358  CE   CE   . MET MET MET A A 56  56  . 44.419  40.987 34.524 1.00 48.35  1 . C  ?  
ATOM   359  N    N    . LEU LEU LEU A A 57  57  . 48.110  44.857 31.019 1.00 46.44  1 . N  ?  
ATOM   360  CA   CA   . LEU LEU LEU A A 57  57  . 49.394  45.522 30.811 1.00 51.84  1 . C  ?  
ATOM   361  C    C    . LEU LEU LEU A A 57  57  . 49.345  46.466 29.616 1.00 53.91  1 . C  ?  
ATOM   362  O    O    . LEU LEU LEU A A 57  57  . 49.951  47.542 29.651 1.00 53.11  1 . O  ?  
ATOM   363  CB   CB   . LEU LEU LEU A A 57  57  . 50.504  44.487 30.634 1.00 45.33  1 . C  ?  
ATOM   364  CG   CG   . LEU LEU LEU A A 57  57  . 50.911  43.749 31.905 1.00 46.22  1 . C  ?  
ATOM   365  CD1  CD1  . LEU LEU LEU A A 57  57  . 51.441  42.372 31.581 1.00 46.60  1 . C  ?  
ATOM   366  CD2  CD2  . LEU LEU LEU A A 57  57  . 51.945  44.562 32.663 1.00 46.11  1 . C  ?  
ATOM   367  N    N    . LEU LEU LEU A A 58  58  . 48.625  46.088 28.554 1.00 56.25  1 . N  ?  
ATOM   368  CA   CA   . LEU LEU LEU A A 58  58  . 48.496  46.916 27.360 1.00 50.58  1 . C  ?  
ATOM   369  C    C    . LEU LEU LEU A A 58  58  . 47.434  47.991 27.500 1.00 54.25  1 . C  ?  
ATOM   370  O    O    . LEU LEU LEU A A 58  58  . 47.090  48.629 26.503 1.00 61.12  1 . O  ?  
ATOM   371  CB   CB   . LEU LEU LEU A A 58  58  . 48.187  46.044 26.144 1.00 48.07  1 . C  ?  
ATOM   372  CG   CG   . LEU LEU LEU A A 58  58  . 49.262  44.992 25.864 1.00 52.81  1 . C  ?  
ATOM   373  CD1  CD1  . LEU LEU LEU A A 58  58  . 49.033  44.266 24.539 1.00 55.35  1 . C  ?  
ATOM   374  CD2  CD2  . LEU LEU LEU A A 58  58  . 50.649  45.620 25.897 1.00 53.97  1 . C  ?  
ATOM   375  N    N    . ALA ALA ALA A A 59  59  . 46.905  48.206 28.701 1.00 56.93  1 . N  ?  
ATOM   376  CA   CA   . ALA ALA ALA A A 59  59  . 45.846  49.188 28.886 1.00 58.64  1 . C  ?  
ATOM   377  C    C    . ALA ALA ALA A A 59  59  . 46.420  50.594 28.823 1.00 68.26  1 . C  ?  
ATOM   378  O    O    . ALA ALA ALA A A 59  59  . 47.533  50.855 29.300 1.00 71.01  1 . O  ?  
ATOM   379  CB   CB   . ALA ALA ALA A A 59  59  . 45.132  48.972 30.220 1.00 56.66  1 . C  ?  
ATOM   380  N    N    . THR THR THR A A 60  60  . 45.656  51.501 28.231 1.00 64.26  1 . N  ?  
ATOM   381  CA   CA   . THR THR THR A A 60  60  . 46.121  52.855 27.989 1.00 67.40  1 . C  ?  
ATOM   382  C    C    . THR THR THR A A 60  60  . 45.666  53.778 29.113 1.00 65.08  1 . C  ?  
ATOM   383  O    O    . THR THR THR A A 60  60  . 44.744  53.470 29.872 1.00 65.88  1 . O  ?  
ATOM   384  CB   CB   . THR THR THR A A 60  60  . 45.609  53.363 26.639 1.00 69.61  1 . C  ?  
ATOM   385  OG1  OG1  . THR THR THR A A 60  60  . 44.206  53.631 26.733 1.00 72.31  1 . O  ?  
ATOM   386  CG2  CG2  . THR THR THR A A 60  60  . 45.838  52.310 25.554 1.00 67.50  1 . C  ?  
ATOM   387  N    N    . GLY GLY GLY A A 61  61  . 46.350  54.913 29.227 1.00 60.97  1 . N  ?  
ATOM   388  CA   CA   . GLY GLY GLY A A 61  61  . 45.969  55.914 30.202 1.00 67.48  1 . C  ?  
ATOM   389  C    C    . GLY GLY GLY A A 61  61  . 46.155  55.532 31.652 1.00 66.04  1 . C  ?  
ATOM   390  O    O    . GLY GLY GLY A A 61  61  . 45.588  56.198 32.526 1.00 62.35  1 . O  ?  
ATOM   391  N    N    . MET MET MET A A 62  62  . 46.917  54.481 31.941 1.00 63.39  1 . N  ?  
ATOM   392  CA   CA   . MET MET MET A A 62  62  . 47.265  54.183 33.321 1.00 58.81  1 . C  ?  
ATOM   393  C    C    . MET MET MET A A 62  62  . 48.231  55.231 33.847 1.00 55.53  1 . C  ?  
ATOM   394  O    O    . MET MET MET A A 62  62  . 49.114  55.694 33.125 1.00 61.56  1 . O  ?  
ATOM   395  CB   CB   . MET MET MET A A 62  62  . 47.903  52.803 33.433 1.00 59.65  1 . C  ?  
ATOM   396  CG   CG   . MET MET MET A A 62  62  . 46.938  51.648 33.398 1.00 69.24  1 . C  ?  
ATOM   397  SD   SD   . MET MET MET A A 62  62  . 47.730  50.127 33.980 1.00 66.69  1 . S  ?  
ATOM   398  CE   CE   . MET MET MET A A 62  62  . 49.064  49.956 32.780 1.00 65.22  1 . C  ?  
ATOM   399  N    N    . LYS LYS LYS A A 63  63  . 48.051  55.614 35.107 1.00 55.56  1 . N  ?  
ATOM   400  CA   CA   . LYS LYS LYS A A 63  63  . 49.023  56.448 35.787 1.00 54.46  1 . C  ?  
ATOM   401  C    C    . LYS LYS LYS A A 63  63  . 50.330  55.677 35.995 1.00 56.11  1 . C  ?  
ATOM   402  O    O    . LYS LYS LYS A A 63  63  . 50.367  54.440 35.974 1.00 50.26  1 . O  ?  
ATOM   403  CB   CB   . LYS LYS LYS A A 63  63  . 48.483  56.915 37.136 1.00 55.86  1 . C  ?  
ATOM   404  CG   CG   . LYS LYS LYS A A 63  63  . 47.103  57.524 37.084 1.00 66.87  1 . C  ?  
ATOM   405  CD   CD   . LYS LYS LYS A A 63  63  . 46.735  58.181 38.420 1.00 79.97  1 . C  ?  
ATOM   406  CE   CE   . LYS LYS LYS A A 63  63  . 47.727  59.291 38.792 1.00 85.26  1 . C  ?  
ATOM   407  NZ   NZ   . LYS LYS LYS A A 63  63  . 47.302  60.077 39.993 1.00 89.92  1 . N  ?  
ATOM   408  N    N    . LEU LEU LEU A A 64  64  . 51.415  56.429 36.205 1.00 47.07  1 . N  ?  
ATOM   409  CA   CA   . LEU LEU LEU A A 64  64  . 52.706  55.792 36.435 1.00 47.60  1 . C  ?  
ATOM   410  C    C    . LEU LEU LEU A A 64  64  . 52.640  54.834 37.621 1.00 48.97  1 . C  ?  
ATOM   411  O    O    . LEU LEU LEU A A 64  64  . 53.028  53.661 37.512 1.00 42.65  1 . O  ?  
ATOM   412  CB   CB   . LEU LEU LEU A A 64  64  . 53.791  56.850 36.656 1.00 41.24  1 . C  ?  
ATOM   413  CG   CG   . LEU LEU LEU A A 64  64  . 55.169  56.318 37.072 1.00 44.10  1 . C  ?  
ATOM   414  CD1  CD1  . LEU LEU LEU A A 64  64  . 55.732  55.404 36.005 1.00 40.53  1 . C  ?  
ATOM   415  CD2  CD2  . LEU LEU LEU A A 64  64  . 56.121  57.466 37.349 1.00 47.64  1 . C  ?  
ATOM   416  N    N    . ALA ALA ALA A A 65  65  . 52.143  55.322 38.766 1.00 47.35  1 . N  ?  
ATOM   417  CA   CA   . ALA ALA ALA A A 65  65  . 52.134  54.514 39.980 1.00 45.60  1 . C  ?  
ATOM   418  C    C    . ALA ALA ALA A A 65  65  . 51.344  53.228 39.788 1.00 48.85  1 . C  ?  
ATOM   419  O    O    . ALA ALA ALA A A 65  65  . 51.730  52.178 40.313 1.00 48.87  1 . O  ?  
ATOM   420  CB   CB   . ALA ALA ALA A A 65  65  . 51.565  55.310 41.152 1.00 42.10  1 . C  ?  
ATOM   421  N    N    . ASP ASP ASP A A 66  66  . 50.241  53.283 39.034 1.00 47.05  1 . N  ?  
ATOM   422  CA   CA   . ASP ASP ASP A A 66  66  . 49.439  52.079 38.827 1.00 47.85  1 . C  ?  
ATOM   423  C    C    . ASP ASP ASP A A 66  66  . 50.100  51.109 37.856 1.00 47.80  1 . C  ?  
ATOM   424  O    O    . ASP ASP ASP A A 66  66  . 49.878  49.890 37.952 1.00 41.15  1 . O  ?  
ATOM   425  CB   CB   . ASP ASP ASP A A 66  66  . 48.043  52.447 38.320 1.00 47.98  1 . C  ?  
ATOM   426  CG   CG   . ASP ASP ASP A A 66  66  . 47.254  53.216 39.337 1.00 52.87  1 . C  ?  
ATOM   427  OD1  OD1  . ASP ASP ASP A A 66  66  . 47.530  53.029 40.540 1.00 56.18  1 . O  ?  
ATOM   428  OD2  OD2  . ASP ASP ASP A A 66  66  . 46.375  54.011 38.945 1.00 66.83  1 . O  ?  
ATOM   429  N    N    . THR THR THR A A 67  67  . 50.883  51.625 36.902 1.00 43.84  1 . N  ?  
ATOM   430  CA   CA   . THR THR THR A A 67  67  . 51.577  50.741 35.974 1.00 50.13  1 . C  ?  
ATOM   431  C    C    . THR THR THR A A 67  67  . 52.727  50.020 36.666 1.00 42.48  1 . C  ?  
ATOM   432  O    O    . THR THR THR A A 67  67  . 52.940  48.821 36.452 1.00 41.38  1 . O  ?  
ATOM   433  CB   CB   . THR THR THR A A 67  67  . 52.084  51.527 34.766 1.00 51.26  1 . C  ?  
ATOM   434  OG1  OG1  . THR THR THR A A 67  67  . 50.977  52.160 34.117 1.00 58.66  1 . O  ?  
ATOM   435  CG2  CG2  . THR THR THR A A 67  67  . 52.761  50.586 33.776 1.00 49.69  1 . C  ?  
ATOM   436  N    N    . LEU LEU LEU A A 68  68  . 53.464  50.731 37.514 1.00 45.40  1 . N  ?  
ATOM   437  CA   CA   . LEU LEU LEU A A 68  68  . 54.545  50.090 38.239 1.00 43.83  1 . C  ?  
ATOM   438  C    C    . LEU LEU LEU A A 68  68  . 53.994  49.093 39.248 1.00 45.88  1 . C  ?  
ATOM   439  O    O    . LEU LEU LEU A A 68  68  . 54.508  47.972 39.364 1.00 41.12  1 . O  ?  
ATOM   440  CB   CB   . LEU LEU LEU A A 68  68  . 55.416  51.147 38.908 1.00 41.74  1 . C  ?  
ATOM   441  CG   CG   . LEU LEU LEU A A 68  68  . 56.084  52.113 37.927 1.00 46.00  1 . C  ?  
ATOM   442  CD1  CD1  . LEU LEU LEU A A 68  68  . 56.979  53.144 38.643 1.00 43.18  1 . C  ?  
ATOM   443  CD2  CD2  . LEU LEU LEU A A 68  68  . 56.879  51.325 36.890 1.00 47.90  1 . C  ?  
ATOM   444  N    N    . ASN ASN ASN A A 69  69  . 52.927  49.462 39.962 1.00 42.64  1 . N  ?  
ATOM   445  CA   CA   . ASN ASN ASN A A 69  69  . 52.349  48.525 40.920 1.00 43.98  1 . C  ?  
ATOM   446  C    C    . ASN ASN ASN A A 69  69  . 51.822  47.274 40.219 1.00 42.85  1 . C  ?  
ATOM   447  O    O    . ASN ASN ASN A A 69  69  . 51.948  46.154 40.738 1.00 37.95  1 . O  ?  
ATOM   448  CB   CB   . ASN ASN ASN A A 69  69  . 51.264  49.222 41.743 1.00 38.48  1 . C  ?  
ATOM   449  CG   CG   . ASN ASN ASN A A 69  69  . 51.862  50.149 42.817 1.00 52.87  1 . C  ?  
ATOM   450  OD1  OD1  . ASN ASN ASN A A 69  69  . 52.931  49.863 43.384 1.00 50.27  1 . O  ?  
ATOM   451  ND2  ND2  . ASN ASN ASN A A 69  69  . 51.186  51.266 43.091 1.00 54.00  1 . N  ?  
ATOM   452  N    N    . LEU LEU LEU A A 70  70  . 51.267  47.435 39.019 1.00 42.52  1 . N  ?  
ATOM   453  CA   CA   . LEU LEU LEU A A 70  70  . 50.807  46.273 38.270 1.00 39.29  1 . C  ?  
ATOM   454  C    C    . LEU LEU LEU A A 70  70  . 51.976  45.359 37.924 1.00 42.30  1 . C  ?  
ATOM   455  O    O    . LEU LEU LEU A A 70  70  . 51.949  44.154 38.218 1.00 43.73  1 . O  ?  
ATOM   456  CB   CB   . LEU LEU LEU A A 70  70  . 50.062  46.716 37.009 1.00 39.06  1 . C  ?  
ATOM   457  CG   CG   . LEU LEU LEU A A 70  70  . 49.575  45.592 36.098 1.00 39.11  1 . C  ?  
ATOM   458  CD1  CD1  . LEU LEU LEU A A 70  70  . 48.599  44.682 36.819 1.00 37.89  1 . C  ?  
ATOM   459  CD2  CD2  . LEU LEU LEU A A 70  70  . 48.949  46.163 34.854 1.00 42.30  1 . C  ?  
ATOM   460  N    N    . ILE ILE ILE A A 71  71  . 53.021  45.918 37.305 1.00 40.80  1 . N  ?  
ATOM   461  CA   CA   . ILE ILE ILE A A 71  71  . 54.172  45.100 36.930 1.00 41.65  1 . C  ?  
ATOM   462  C    C    . ILE ILE ILE A A 71  71  . 54.792  44.448 38.159 1.00 37.23  1 . C  ?  
ATOM   463  O    O    . ILE ILE ILE A A 71  71  . 55.120  43.255 38.146 1.00 35.94  1 . O  ?  
ATOM   464  CB   CB   . ILE ILE ILE A A 71  71  . 55.199  45.936 36.148 1.00 42.82  1 . C  ?  
ATOM   465  CG1  CG1  . ILE ILE ILE A A 71  71  . 54.579  46.411 34.833 1.00 41.56  1 . C  ?  
ATOM   466  CG2  CG2  . ILE ILE ILE A A 71  71  . 56.449  45.118 35.890 1.00 38.20  1 . C  ?  
ATOM   467  CD1  CD1  . ILE ILE ILE A A 71  71  . 55.498  47.238 33.988 1.00 43.19  1 . C  ?  
ATOM   468  N    N    . ASP ASP ASP A A 72  72  . 54.946  45.208 39.245 1.00 36.59  1 . N  ?  
ATOM   469  CA   CA   . ASP ASP ASP A A 72  72  . 55.532  44.643 40.455 1.00 38.00  1 . C  ?  
ATOM   470  C    C    . ASP ASP ASP A A 72  72  . 54.717  43.449 40.939 1.00 38.57  1 . C  ?  
ATOM   471  O    O    . ASP ASP ASP A A 72  72  . 55.270  42.397 41.285 1.00 41.69  1 . O  ?  
ATOM   472  CB   CB   . ASP ASP ASP A A 72  72  . 55.649  45.714 41.544 1.00 32.49  1 . C  ?  
ATOM   473  CG   CG   . ASP ASP ASP A A 72  72  . 56.432  45.239 42.761 1.00 38.16  1 . C  ?  
ATOM   474  OD1  OD1  . ASP ASP ASP A A 72  72  . 57.390  44.436 42.604 1.00 41.04  1 . O  ?  
ATOM   475  OD2  OD2  . ASP ASP ASP A A 72  72  . 56.104  45.680 43.884 1.00 36.08  1 . O  ?  
ATOM   476  N    N    . THR THR THR A A 73  73  . 53.391  43.580 40.921 1.00 40.61  1 . N  ?  
ATOM   477  CA   CA   . THR THR THR A A 73  73  . 52.522  42.499 41.374 1.00 30.59  1 . C  ?  
ATOM   478  C    C    . THR THR THR A A 73  73  . 52.668  41.276 40.487 1.00 35.75  1 . C  ?  
ATOM   479  O    O    . THR THR THR A A 73  73  . 52.822  40.151 40.980 1.00 37.71  1 . O  ?  
ATOM   480  CB   CB   . THR THR THR A A 73  73  . 51.079  43.001 41.405 1.00 36.86  1 . C  ?  
ATOM   481  OG1  OG1  . THR THR THR A A 73  73  . 50.997  44.107 42.316 1.00 34.97  1 . O  ?  
ATOM   482  CG2  CG2  . THR THR THR A A 73  73  . 50.058  41.877 41.828 1.00 32.34  1 . C  ?  
ATOM   483  N    N    . ILE ILE ILE A A 74  74  . 52.625  41.468 39.170 1.00 35.79  1 . N  ?  
ATOM   484  CA   CA   . ILE ILE ILE A A 74  74  . 52.771  40.325 38.280 1.00 37.37  1 . C  ?  
ATOM   485  C    C    . ILE ILE ILE A A 74  74  . 54.109  39.630 38.500 1.00 41.19  1 . C  ?  
ATOM   486  O    O    . ILE ILE ILE A A 74  74  . 54.202  38.397 38.393 1.00 43.39  1 . O  ?  
ATOM   487  CB   CB   . ILE ILE ILE A A 74  74  . 52.588  40.765 36.820 1.00 39.51  1 . C  ?  
ATOM   488  CG1  CG1  . ILE ILE ILE A A 74  74  . 51.133  41.165 36.586 1.00 40.60  1 . C  ?  
ATOM   489  CG2  CG2  . ILE ILE ILE A A 74  74  . 53.014  39.655 35.864 1.00 41.26  1 . C  ?  
ATOM   490  CD1  CD1  . ILE ILE ILE A A 74  74  . 50.878  41.783 35.234 1.00 44.69  1 . C  ?  
ATOM   491  N    N    . GLU GLU GLU A A 75  75  . 55.158  40.395 38.826 1.00 42.29  1 . N  ?  
ATOM   492  CA   CA   . GLU GLU GLU A A 75  75  . 56.478  39.803 39.032 1.00 39.55  1 . C  ?  
ATOM   493  C    C    . GLU GLU GLU A A 75  75  . 56.538  39.020 40.335 1.00 38.64  1 . C  ?  
ATOM   494  O    O    . GLU GLU GLU A A 75  75  . 57.011  37.877 40.360 1.00 36.34  1 . O  ?  
ATOM   495  CB   CB   . GLU GLU GLU A A 75  75  . 57.542  40.886 39.004 1.00 37.47  1 . C  ?  
ATOM   496  CG   CG   . GLU GLU GLU A A 75  75  . 57.868  41.323 37.604 1.00 41.16  1 . C  ?  
ATOM   497  CD   CD   . GLU GLU GLU A A 75  75  . 58.998  42.334 37.563 1.00 46.55  1 . C  ?  
ATOM   498  OE1  OE1  . GLU GLU GLU A A 75  75  . 59.183  43.067 38.565 1.00 44.73  1 . O  ?  
ATOM   499  OE2  OE2  . GLU GLU GLU A A 75  75  . 59.709  42.381 36.535 1.00 46.51  1 . O  ?  
ATOM   500  N    N    . ARG ARG ARG A A 76  76  . 56.040  39.609 41.426 1.00 36.26  1 . N  ?  
ATOM   501  CA   CA   . ARG ARG ARG A A 76  76  . 55.993  38.879 42.687 1.00 37.90  1 . C  ?  
ATOM   502  C    C    . ARG ARG ARG A A 76  76  . 55.081  37.651 42.609 1.00 40.37  1 . C  ?  
ATOM   503  O    O    . ARG ARG ARG A A 76  76  . 55.343  36.639 43.276 1.00 40.00  1 . O  ?  
ATOM   504  CB   CB   . ARG ARG ARG A A 76  76  . 55.542  39.810 43.803 1.00 36.83  1 . C  ?  
ATOM   505  CG   CG   . ARG ARG ARG A A 76  76  . 56.565  40.869 44.171 1.00 42.06  1 . C  ?  
ATOM   506  CD   CD   . ARG ARG ARG A A 76  76  . 55.860  41.990 44.879 1.00 37.30  1 . C  ?  
ATOM   507  NE   NE   . ARG ARG ARG A A 76  76  . 56.717  43.018 45.485 1.00 38.58  1 . N  ?  
ATOM   508  CZ   CZ   . ARG ARG ARG A A 76  76  . 57.203  42.932 46.717 1.00 40.20  1 . C  ?  
ATOM   509  NH1  NH1  . ARG ARG ARG A A 76  76  . 56.978  41.848 47.438 1.00 46.05  1 . N  ?  
ATOM   510  NH2  NH2  . ARG ARG ARG A A 76  76  . 57.915  43.911 47.235 1.00 42.75  1 . N  ?  
ATOM   511  N    N    . LEU LEU LEU A A 77  77  . 54.013  37.708 41.808 1.00 37.01  1 . N  ?  
ATOM   512  CA   CA   . LEU LEU LEU A A 77  77  . 53.133  36.550 41.694 1.00 39.30  1 . C  ?  
ATOM   513  C    C    . LEU LEU LEU A A 77  77  . 53.777  35.416 40.919 1.00 40.46  1 . C  ?  
ATOM   514  O    O    . LEU LEU LEU A A 77  77  . 53.202  34.326 40.857 1.00 38.54  1 . O  ?  
ATOM   515  CB   CB   . LEU LEU LEU A A 77  77  . 51.810  36.936 41.034 1.00 39.01  1 . C  ?  
ATOM   516  CG   CG   . LEU LEU LEU A A 77  77  . 50.840  37.784 41.857 1.00 35.94  1 . C  ?  
ATOM   517  CD1  CD1  . LEU LEU LEU A A 77  77  . 49.680  38.215 40.985 1.00 33.66  1 . C  ?  
ATOM   518  CD2  CD2  . LEU LEU LEU A A 77  77  . 50.338  36.998 43.039 1.00 37.18  1 . C  ?  
ATOM   519  N    N    . GLY GLY GLY A A 78  78  . 54.948  35.656 40.331 1.00 42.48  1 . N  ?  
ATOM   520  CA   CA   . GLY GLY GLY A A 78  78  . 55.687  34.624 39.642 1.00 38.62  1 . C  ?  
ATOM   521  C    C    . GLY GLY GLY A A 78  78  . 55.226  34.343 38.237 1.00 40.02  1 . C  ?  
ATOM   522  O    O    . GLY GLY GLY A A 78  78  . 55.582  33.299 37.686 1.00 40.84  1 . O  ?  
ATOM   523  N    N    . ILE ILE ILE A A 79  79  . 54.459  35.248 37.628 1.00 39.43  1 . N  ?  
ATOM   524  CA   CA   . ILE ILE ILE A A 79  79  . 53.920  35.036 36.288 1.00 43.98  1 . C  ?  
ATOM   525  C    C    . ILE ILE ILE A A 79  79  . 54.496  36.008 35.266 1.00 43.73  1 . C  ?  
ATOM   526  O    O    . ILE ILE ILE A A 79  79  . 54.122  35.941 34.092 1.00 47.61  1 . O  ?  
ATOM   527  CB   CB   . ILE ILE ILE A A 79  79  . 52.374  35.094 36.275 1.00 42.02  1 . C  ?  
ATOM   528  CG1  CG1  . ILE ILE ILE A A 79  79  . 51.864  36.343 36.992 1.00 39.80  1 . C  ?  
ATOM   529  CG2  CG2  . ILE ILE ILE A A 79  79  . 51.782  33.870 36.924 1.00 39.46  1 . C  ?  
ATOM   530  CD1  CD1  . ILE ILE ILE A A 79  79  . 50.340  36.401 37.085 1.00 43.97  1 . C  ?  
ATOM   531  N    N    . SER SER SER A A 80  80  . 55.394  36.903 35.664 1.00 41.95  1 . N  ?  
ATOM   532  CA   CA   . SER SER SER A A 80  80  . 56.003  37.810 34.694 1.00 43.28  1 . C  ?  
ATOM   533  C    C    . SER SER SER A A 80  80  . 56.752  37.090 33.575 1.00 44.90  1 . C  ?  
ATOM   534  O    O    . SER SER SER A A 80  80  . 56.911  37.670 32.499 1.00 45.95  1 . O  ?  
ATOM   535  CB   CB   . SER SER SER A A 80  80  . 56.950  38.782 35.400 1.00 42.88  1 . C  ?  
ATOM   536  OG   OG   . SER SER SER A A 80  80  . 57.787  38.077 36.289 1.00 41.26  1 . O  ?  
ATOM   537  N    N    . TYR TYR TYR A A 81  81  . 57.214  35.850 33.774 1.00 40.56  1 . N  ?  
ATOM   538  CA   CA   . TYR TYR TYR A A 81  81  . 57.880  35.186 32.652 1.00 43.64  1 . C  ?  
ATOM   539  C    C    . TYR TYR TYR A A 81  81  . 56.964  34.999 31.444 1.00 48.37  1 . C  ?  
ATOM   540  O    O    . TYR TYR TYR A A 81  81  . 57.454  34.640 30.371 1.00 54.55  1 . O  ?  
ATOM   541  CB   CB   . TYR TYR TYR A A 81  81  . 58.458  33.822 33.070 1.00 41.54  1 . C  ?  
ATOM   542  CG   CG   . TYR TYR TYR A A 81  81  . 57.436  32.717 33.208 1.00 43.16  1 . C  ?  
ATOM   543  CD2  CD2  . TYR TYR TYR A A 81  81  . 57.209  31.815 32.178 1.00 48.77  1 . C  ?  
ATOM   544  CD1  CD1  . TYR TYR TYR A A 81  81  . 56.695  32.573 34.373 1.00 42.78  1 . C  ?  
ATOM   545  CE2  CE2  . TYR TYR TYR A A 81  81  . 56.266  30.791 32.307 1.00 45.25  1 . C  ?  
ATOM   546  CE1  CE1  . TYR TYR TYR A A 81  81  . 55.749  31.573 34.506 1.00 45.80  1 . C  ?  
ATOM   547  CZ   CZ   . TYR TYR TYR A A 81  81  . 55.533  30.680 33.477 1.00 45.78  1 . C  ?  
ATOM   548  OH   OH   . TYR TYR TYR A A 81  81  . 54.590  29.682 33.643 1.00 42.00  1 . O  ?  
ATOM   549  N    N    . HIS HIS HIS A A 82  82  . 55.659  35.229 31.586 1.00 44.53  1 . N  ?  
ATOM   550  CA   CA   . HIS HIS HIS A A 82  82  . 54.735  35.208 30.455 1.00 47.21  1 . C  ?  
ATOM   551  C    C    . HIS HIS HIS A A 82  82  . 54.702  36.517 29.678 1.00 46.53  1 . C  ?  
ATOM   552  O    O    . HIS HIS HIS A A 82  82  . 54.209  36.521 28.548 1.00 53.75  1 . O  ?  
ATOM   553  CB   CB   . HIS HIS HIS A A 82  82  . 53.291  34.896 30.919 1.00 47.40  1 . C  ?  
ATOM   554  CG   CG   . HIS HIS HIS A A 82  82  . 53.076  33.479 31.370 1.00 45.78  1 . C  ?  
ATOM   555  ND1  ND1  . HIS HIS HIS A A 82  82  . 53.356  32.387 30.571 1.00 45.33  1 . N  ?  
ATOM   556  CD2  CD2  . HIS HIS HIS A A 82  82  . 52.604  32.977 32.537 1.00 46.15  1 . C  ?  
ATOM   557  CE1  CE1  . HIS HIS HIS A A 82  82  . 53.078  31.277 31.232 1.00 42.52  1 . C  ?  
ATOM   558  NE2  NE2  . HIS HIS HIS A A 82  82  . 52.620  31.606 32.427 1.00 43.54  1 . N  ?  
ATOM   559  N    N    . PHE PHE PHE A A 83  83  . 55.172  37.626 30.250 1.00 44.94  1 . N  ?  
ATOM   560  CA   CA   . PHE PHE PHE A A 83  83  . 55.008  38.948 29.646 1.00 47.16  1 . C  ?  
ATOM   561  C    C    . PHE PHE PHE A A 83  83  . 56.332  39.692 29.543 1.00 49.96  1 . C  ?  
ATOM   562  O    O    . PHE PHE PHE A A 83  83  . 56.408  40.890 29.828 1.00 47.97  1 . O  ?  
ATOM   563  CB   CB   . PHE PHE PHE A A 83  83  . 54.013  39.789 30.438 1.00 47.21  1 . C  ?  
ATOM   564  CG   CG   . PHE PHE PHE A A 83  83  . 52.769  39.054 30.788 1.00 52.57  1 . C  ?  
ATOM   565  CD1  CD1  . PHE PHE PHE A A 83  83  . 51.746  38.926 29.862 1.00 50.63  1 . C  ?  
ATOM   566  CD2  CD2  . PHE PHE PHE A A 83  83  . 52.628  38.465 32.031 1.00 47.33  1 . C  ?  
ATOM   567  CE1  CE1  . PHE PHE PHE A A 83  83  . 50.609  38.243 30.169 1.00 53.29  1 . C  ?  
ATOM   568  CE2  CE2  . PHE PHE PHE A A 83  83  . 51.485  37.777 32.343 1.00 52.39  1 . C  ?  
ATOM   569  CZ   CZ   . PHE PHE PHE A A 83  83  . 50.470  37.662 31.409 1.00 53.73  1 . C  ?  
ATOM   570  N    N    . GLU GLU GLU A A 84  84  . 57.393  39.004 29.123 1.00 50.16  1 . N  ?  
ATOM   571  CA   CA   . GLU GLU GLU A A 84  84  . 58.707  39.638 29.113 1.00 54.65  1 . C  ?  
ATOM   572  C    C    . GLU GLU GLU A A 84  84  . 58.771  40.766 28.091 1.00 53.08  1 . C  ?  
ATOM   573  O    O    . GLU GLU GLU A A 84  84  . 59.370  41.811 28.363 1.00 50.45  1 . O  ?  
ATOM   574  CB   CB   . GLU GLU GLU A A 84  84  . 59.799  38.591 28.878 1.00 49.83  1 . C  ?  
ATOM   575  CG   CG   . GLU GLU GLU A A 84  84  . 60.177  37.886 30.183 1.00 55.56  1 . C  ?  
ATOM   576  CD   CD   . GLU GLU GLU A A 84  84  . 60.857  36.533 29.998 1.00 72.04  1 . C  ?  
ATOM   577  OE1  OE1  . GLU GLU GLU A A 84  84  . 60.964  36.044 28.841 1.00 74.91  1 . O  ?  
ATOM   578  OE2  OE2  . GLU GLU GLU A A 84  84  . 61.278  35.954 31.032 1.00 67.96  1 . O  ?  
ATOM   579  N    N    . LYS LYS LYS A A 85  85  . 58.108  40.606 26.942 1.00 53.79  1 . N  ?  
ATOM   580  CA   CA   . LYS LYS LYS A A 85  85  . 58.061  41.694 25.968 1.00 53.39  1 . C  ?  
ATOM   581  C    C    . LYS LYS LYS A A 85  85  . 57.221  42.869 26.472 1.00 54.69  1 . C  ?  
ATOM   582  O    O    . LYS LYS LYS A A 85  85  . 57.682  44.016 26.459 1.00 58.08  1 . O  ?  
ATOM   583  CB   CB   . LYS LYS LYS A A 85  85  . 57.531  41.187 24.630 1.00 59.82  1 . C  ?  
ATOM   584  CG   CG   . LYS LYS LYS A A 85  85  . 57.171  42.314 23.657 1.00 65.39  1 . C  ?  
ATOM   585  CD   CD   . LYS LYS LYS A A 85  85  . 57.443  41.922 22.205 1.00 69.24  1 . C  ?  
ATOM   586  CE   CE   . LYS LYS LYS A A 85  85  . 56.938  42.995 21.250 1.00 68.10  1 . C  ?  
ATOM   587  NZ   NZ   . LYS LYS LYS A A 85  85  . 57.583  44.314 21.495 1.00 67.42  1 . N  ?  
ATOM   588  N    N    . GLU GLU GLU A A 86  86  . 55.985  42.611 26.915 1.00 49.85  1 . N  ?  
ATOM   589  CA   CA   . GLU GLU GLU A A 86  86  . 55.122  43.708 27.354 1.00 51.41  1 . C  ?  
ATOM   590  C    C    . GLU GLU GLU A A 86  86  . 55.741  44.474 28.515 1.00 49.47  1 . C  ?  
ATOM   591  O    O    . GLU GLU GLU A A 86  86  . 55.711  45.710 28.544 1.00 49.38  1 . O  ?  
ATOM   592  CB   CB   . GLU GLU GLU A A 86  86  . 53.738  43.191 27.761 1.00 50.22  1 . C  ?  
ATOM   593  CG   CG   . GLU GLU GLU A A 86  86  . 52.893  42.650 26.633 1.00 50.70  1 . C  ?  
ATOM   594  CD   CD   . GLU GLU GLU A A 86  86  . 53.252  41.223 26.304 1.00 53.68  1 . C  ?  
ATOM   595  OE1  OE1  . GLU GLU GLU A A 86  86  . 54.263  40.744 26.852 1.00 57.78  1 . O  ?  
ATOM   596  OE2  OE2  . GLU GLU GLU A A 86  86  . 52.524  40.575 25.520 1.00 60.02  1 . O  ?  
ATOM   597  N    N    . ILE ILE ILE A A 87  87  . 56.271  43.755 29.503 1.00 50.42  1 . N  ?  
ATOM   598  CA   CA   . ILE ILE ILE A A 87  87  . 56.897  44.422 30.636 1.00 49.04  1 . C  ?  
ATOM   599  C    C    . ILE ILE ILE A A 87  87  . 58.084  45.245 30.158 1.00 50.51  1 . C  ?  
ATOM   600  O    O    . ILE ILE ILE A A 87  87  . 58.278  46.395 30.581 1.00 47.53  1 . O  ?  
ATOM   601  CB   CB   . ILE ILE ILE A A 87  87  . 57.293  43.387 31.709 1.00 47.42  1 . C  ?  
ATOM   602  CG1  CG1  . ILE ILE ILE A A 87  87  . 56.022  42.796 32.350 1.00 48.22  1 . C  ?  
ATOM   603  CG2  CG2  . ILE ILE ILE A A 87  87  . 58.221  44.001 32.746 1.00 42.97  1 . C  ?  
ATOM   604  CD1  CD1  . ILE ILE ILE A A 87  87  . 56.246  41.733 33.417 1.00 43.34  1 . C  ?  
ATOM   605  N    N    . ASP ASP ASP A A 88  88  . 58.867  44.684 29.230 1.00 52.04  1 . N  ?  
ATOM   606  CA   CA   . ASP ASP ASP A A 88  88  . 60.037  45.386 28.723 1.00 51.37  1 . C  ?  
ATOM   607  C    C    . ASP ASP ASP A A 88  88  . 59.641  46.690 28.047 1.00 53.54  1 . C  ?  
ATOM   608  O    O    . ASP ASP ASP A A 88  88  . 60.227  47.747 28.316 1.00 52.96  1 . O  ?  
ATOM   609  CB   CB   . ASP ASP ASP A A 88  88  . 60.817  44.505 27.754 1.00 53.23  1 . C  ?  
ATOM   610  CG   CG   . ASP ASP ASP A A 88  88  . 62.020  45.230 27.167 1.00 66.93  1 . C  ?  
ATOM   611  OD1  OD1  . ASP ASP ASP A A 88  88  . 63.056  45.330 27.871 1.00 64.80  1 . O  ?  
ATOM   612  OD2  OD2  . ASP ASP ASP A A 88  88  . 61.926  45.722 26.013 1.00 72.08  1 . O  ?  
ATOM   613  N    N    . ASP ASP ASP A A 89  89  . 58.650  46.635 27.158 1.00 53.12  1 . N  ?  
ATOM   614  CA   CA   . ASP ASP ASP A A 89  89  . 58.258  47.843 26.442 1.00 54.38  1 . C  ?  
ATOM   615  C    C    . ASP ASP ASP A A 89  89  . 57.784  48.921 27.400 1.00 48.63  1 . C  ?  
ATOM   616  O    O    . ASP ASP ASP A A 89  89  . 58.130  50.094 27.238 1.00 51.44  1 . O  ?  
ATOM   617  CB   CB   . ASP ASP ASP A A 89  89  . 57.182  47.524 25.412 1.00 55.48  1 . C  ?  
ATOM   618  CG   CG   . ASP ASP ASP A A 89  89  . 57.678  46.579 24.332 1.00 62.20  1 . C  ?  
ATOM   619  OD1  OD1  . ASP ASP ASP A A 89  89  . 58.911  46.531 24.090 1.00 65.57  1 . O  ?  
ATOM   620  OD2  OD2  . ASP ASP ASP A A 89  89  . 56.830  45.884 23.726 1.00 62.56  1 . O  ?  
ATOM   621  N    N    . ILE ILE ILE A A 90  90  . 57.029  48.541 28.433 1.00 48.81  1 . N  ?  
ATOM   622  CA   CA   . ILE ILE ILE A A 90  90  . 56.467  49.547 29.334 1.00 50.44  1 . C  ?  
ATOM   623  C    C    . ILE ILE ILE A A 90  90  . 57.557  50.208 30.173 1.00 50.63  1 . C  ?  
ATOM   624  O    O    . ILE ILE ILE A A 90  90  . 57.537  51.427 30.387 1.00 47.54  1 . O  ?  
ATOM   625  CB   CB   . ILE ILE ILE A A 90  90  . 55.372  48.928 30.217 1.00 47.73  1 . C  ?  
ATOM   626  CG1  CG1  . ILE ILE ILE A A 90  90  . 54.171  48.521 29.355 1.00 44.99  1 . C  ?  
ATOM   627  CG2  CG2  . ILE ILE ILE A A 90  90  . 54.966  49.909 31.318 1.00 40.89  1 . C  ?  
ATOM   628  CD1  CD1  . ILE ILE ILE A A 90  90  . 53.231  47.548 30.030 1.00 35.40  1 . C  ?  
ATOM   629  N    N    . LEU LEU LEU A A 91  91  . 58.505  49.416 30.690 1.00 53.03  1 . N  ?  
ATOM   630  CA   CA   . LEU LEU LEU A A 91  91  . 59.597  49.991 31.470 1.00 50.78  1 . C  ?  
ATOM   631  C    C    . LEU LEU LEU A A 91  91  . 60.520  50.820 30.589 1.00 51.51  1 . C  ?  
ATOM   632  O    O    . LEU LEU LEU A A 91  91  . 60.975  51.895 30.994 1.00 46.12  1 . O  ?  
ATOM   633  CB   CB   . LEU LEU LEU A A 91  91  . 60.390  48.890 32.174 1.00 47.39  1 . C  ?  
ATOM   634  CG   CG   . LEU LEU LEU A A 91  91  . 59.604  48.091 33.207 1.00 49.73  1 . C  ?  
ATOM   635  CD1  CD1  . LEU LEU LEU A A 91  91  . 60.492  47.034 33.859 1.00 41.40  1 . C  ?  
ATOM   636  CD2  CD2  . LEU LEU LEU A A 91  91  . 59.004  49.024 34.242 1.00 45.84  1 . C  ?  
ATOM   637  N    N    . ASP ASP ASP A A 92  92  . 60.817  50.326 29.384 1.00 52.29  1 . N  ?  
ATOM   638  CA   CA   . ASP ASP ASP A A 92  92  . 61.607  51.109 28.444 1.00 51.20  1 . C  ?  
ATOM   639  C    C    . ASP ASP ASP A A 92  92  . 60.999  52.493 28.259 1.00 52.76  1 . C  ?  
ATOM   640  O    O    . ASP ASP ASP A A 92  92  . 61.660  53.521 28.460 1.00 53.52  1 . O  ?  
ATOM   641  CB   CB   . ASP ASP ASP A A 92  92  . 61.701  50.384 27.103 1.00 49.39  1 . C  ?  
ATOM   642  CG   CG   . ASP ASP ASP A A 92  92  . 62.672  51.061 26.162 1.00 61.84  1 . C  ?  
ATOM   643  OD2  OD2  . ASP ASP ASP A A 92  92  . 63.703  50.448 25.796 1.00 65.50  1 . O  ?  
ATOM   644  OD1  OD1  . ASP ASP ASP A A 92  92  . 62.409  52.228 25.803 1.00 64.77  1 . O  ?  
ATOM   645  N    N    . GLN GLN GLN A A 93  93  . 59.726  52.532 27.883 1.00 53.44  1 . N  ?  
ATOM   646  CA   CA   . GLN GLN GLN A A 93  93  . 59.052  53.806 27.721 1.00 53.74  1 . C  ?  
ATOM   647  C    C    . GLN GLN GLN A A 93  93  . 59.121  54.635 29.003 1.00 52.94  1 . C  ?  
ATOM   648  O    O    . GLN GLN GLN A A 93  93  . 59.377  55.843 28.950 1.00 56.17  1 . O  ?  
ATOM   649  CB   CB   . GLN GLN GLN A A 93  93  . 57.619  53.550 27.266 1.00 54.89  1 . C  ?  
ATOM   650  CG   CG   . GLN GLN GLN A A 93  93  . 56.793  54.796 27.039 1.00 58.90  1 . C  ?  
ATOM   651  CD   CD   . GLN GLN GLN A A 93  93  . 56.009  55.172 28.274 1.00 68.15  1 . C  ?  
ATOM   652  OE1  OE1  . GLN GLN GLN A A 93  93  . 56.024  56.330 28.704 1.00 69.45  1 . O  ?  
ATOM   653  NE2  NE2  . GLN GLN GLN A A 93  93  . 55.312  54.185 28.863 1.00 67.53  1 . N  ?  
ATOM   654  N    N    . ILE ILE ILE A A 94  94  . 58.938  54.009 30.171 1.00 50.46  1 . N  ?  
ATOM   655  CA   CA   . ILE ILE ILE A A 94  94  . 59.045  54.774 31.416 1.00 54.02  1 . C  ?  
ATOM   656  C    C    . ILE ILE ILE A A 94  94  . 60.450  55.337 31.574 1.00 51.47  1 . C  ?  
ATOM   657  O    O    . ILE ILE ILE A A 94  94  . 60.641  56.466 32.037 1.00 51.20  1 . O  ?  
ATOM   658  CB   CB   . ILE ILE ILE A A 94  94  . 58.650  53.908 32.626 1.00 51.63  1 . C  ?  
ATOM   659  CG1  CG1  . ILE ILE ILE A A 94  94  . 57.139  53.653 32.632 1.00 47.22  1 . C  ?  
ATOM   660  CG2  CG2  . ILE ILE ILE A A 94  94  . 59.114  54.574 33.944 1.00 44.78  1 . C  ?  
ATOM   661  CD1  CD1  . ILE ILE ILE A A 94  94  . 56.689  52.772 33.766 1.00 46.65  1 . C  ?  
ATOM   662  N    N    . TYR TYR TYR A A 95  95  . 61.452  54.541 31.206 1.00 52.80  1 . N  ?  
ATOM   663  CA   CA   . TYR TYR TYR A A 95  95  . 62.843  54.954 31.310 1.00 50.75  1 . C  ?  
ATOM   664  C    C    . TYR TYR TYR A A 95  95  . 63.091  56.219 30.509 1.00 51.54  1 . C  ?  
ATOM   665  O    O    . TYR TYR TYR A A 95  95  . 63.675  57.181 31.012 1.00 46.82  1 . O  ?  
ATOM   666  CB   CB   . TYR TYR TYR A A 95  95  . 63.734  53.817 30.817 1.00 47.09  1 . C  ?  
ATOM   667  CG   CG   . TYR TYR TYR A A 95  95  . 65.198  54.119 30.824 1.00 48.29  1 . C  ?  
ATOM   668  CD1  CD1  . TYR TYR TYR A A 95  95  . 65.818  54.592 31.967 1.00 46.81  1 . C  ?  
ATOM   669  CD2  CD2  . TYR TYR TYR A A 95  95  . 65.974  53.890 29.699 1.00 49.17  1 . C  ?  
ATOM   670  CE1  CE1  . TYR TYR TYR A A 95  95  . 67.171  54.845 31.988 1.00 43.44  1 . C  ?  
ATOM   671  CE2  CE2  . TYR TYR TYR A A 95  95  . 67.314  54.138 29.709 1.00 46.08  1 . C  ?  
ATOM   672  CZ   CZ   . TYR TYR TYR A A 95  95  . 67.913  54.623 30.855 1.00 46.66  1 . C  ?  
ATOM   673  OH   OH   . TYR TYR TYR A A 95  95  . 69.271  54.888 30.864 1.00 55.61  1 . O  ?  
ATOM   674  N    N    . ASN ASN ASN A A 96  96  . 62.616  56.243 29.264 1.00 51.31  1 . N  ?  
ATOM   675  CA   CA   . ASN ASN ASN A A 96  96  . 62.883  57.349 28.361 1.00 53.90  1 . C  ?  
ATOM   676  C    C    . ASN ASN ASN A A 96  96  . 62.025  58.585 28.630 1.00 59.75  1 . C  ?  
ATOM   677  O    O    . ASN ASN ASN A A 96  96  . 62.407  59.681 28.215 1.00 61.72  1 . O  ?  
ATOM   678  CB   CB   . ASN ASN ASN A A 96  96  . 62.717  56.871 26.920 1.00 51.36  1 . C  ?  
ATOM   679  CG   CG   . ASN ASN ASN A A 96  96  . 63.920  56.044 26.451 1.00 57.72  1 . C  ?  
ATOM   680  OD1  OD1  . ASN ASN ASN A A 96  96  . 63.777  54.917 25.974 1.00 60.87  1 . O  ?  
ATOM   681  ND2  ND2  . ASN ASN ASN A A 96  96  . 65.115  56.598 26.618 1.00 51.91  1 . N  ?  
ATOM   682  N    N    . GLN GLN GLN A A 97  97  . 60.899  58.453 29.328 1.00 61.44  1 . N  ?  
ATOM   683  CA   CA   . GLN GLN GLN A A 97  97  . 60.109  59.628 29.674 1.00 64.03  1 . C  ?  
ATOM   684  C    C    . GLN GLN GLN A A 97  97  . 60.687  60.398 30.853 1.00 65.53  1 . C  ?  
ATOM   685  O    O    . GLN GLN GLN A A 97  97  . 60.219  61.512 31.122 1.00 73.28  1 . O  ?  
ATOM   686  CB   CB   . GLN GLN GLN A A 97  97  . 58.658  59.227 29.977 1.00 62.60  1 . C  ?  
ATOM   687  CG   CG   . GLN GLN GLN A A 97  97  . 58.460  58.643 31.376 1.00 70.73  1 . C  ?  
ATOM   688  CD   CD   . GLN GLN GLN A A 97  97  . 57.038  58.122 31.642 1.00 72.79  1 . C  ?  
ATOM   689  OE1  OE1  . GLN GLN GLN A A 97  97  . 56.324  57.702 30.722 1.00 69.77  1 . O  ?  
ATOM   690  NE2  NE2  . GLN GLN GLN A A 97  97  . 56.630  58.146 32.913 1.00 67.59  1 . N  ?  
ATOM   691  N    N    . ASN ASN ASN A A 98  98  . 61.689  59.835 31.545 1.00 67.46  1 . N  ?  
ATOM   692  CA   CA   . ASN ASN ASN A A 98  98  . 62.332  60.434 32.718 1.00 73.75  1 . C  ?  
ATOM   693  C    C    . ASN ASN ASN A A 98  98  . 61.352  61.299 33.506 1.00 80.21  1 . C  ?  
ATOM   694  O    O    . ASN ASN ASN A A 98  98  . 61.696  62.393 33.968 1.00 82.45  1 . O  ?  
ATOM   695  CB   CB   . ASN ASN ASN A A 98  98  . 63.567  61.254 32.305 1.00 79.61  1 . C  ?  
ATOM   696  CG   CG   . ASN ASN ASN A A 98  98  . 64.820  60.913 33.132 1.00 81.39  1 . C  ?  
ATOM   697  OD1  OD1  . ASN ASN ASN A A 98  98  . 64.925  59.832 33.727 1.00 80.03  1 . O  ?  
ATOM   698  ND2  ND2  . ASN ASN ASN A A 98  98  . 65.780  61.837 33.155 1.00 75.17  1 . N  ?  
ATOM   699  N    N    . SER SER SER A A 99  99  . 60.123  60.807 33.650 1.00 85.76  1 . N  ?  
ATOM   700  CA   CA   . SER SER SER A A 99  99  . 59.060  61.558 34.304 1.00 86.99  1 . C  ?  
ATOM   701  C    C    . SER SER SER A A 99  99  . 59.457  61.946 35.723 1.00 92.90  1 . C  ?  
ATOM   702  O    O    . SER SER SER A A 99  99  . 60.237  61.257 36.390 1.00 89.58  1 . O  ?  
ATOM   703  CB   CB   . SER SER SER A A 99  99  . 57.788  60.718 34.337 1.00 81.18  1 . C  ?  
ATOM   704  OG   OG   . SER SER SER A A 99  99  . 58.098  59.402 34.783 1.00 76.79  1 . O  ?  
ATOM   705  N    N    . ASN ASN ASN A A 100 100 . 58.904  63.063 36.189 1.00 94.84  1 . N  ?  
ATOM   706  CA   CA   . ASN ASN ASN A A 100 100 . 59.065  63.469 37.576 1.00 91.97  1 . C  ?  
ATOM   707  C    C    . ASN ASN ASN A A 100 100 . 57.871  63.000 38.391 1.00 92.35  1 . C  ?  
ATOM   708  O    O    . ASN ASN ASN A A 100 100 . 56.718  63.143 37.964 1.00 93.00  1 . O  ?  
ATOM   709  CB   CB   . ASN ASN ASN A A 100 100 . 59.204  64.982 37.716 1.00 100.08 1 . C  ?  
ATOM   710  CG   CG   . ASN ASN ASN A A 100 100 . 59.148  65.429 39.169 1.00 98.54  1 . C  ?  
ATOM   711  OD1  OD1  . ASN ASN ASN A A 100 100 . 60.183  65.609 39.814 1.00 98.41  1 . O  ?  
ATOM   712  ND2  ND2  . ASN ASN ASN A A 100 100 . 57.935  65.586 39.698 1.00 94.97  1 . N  ?  
ATOM   713  N    N    . CYS CYS CYS A A 101 101 . 58.158  62.458 39.571 1.00 94.22  1 . N  ?  
ATOM   714  CA   CA   . CYS CYS CYS A A 101 101 . 57.139  61.972 40.491 1.00 88.78  1 . C  ?  
ATOM   715  C    C    . CYS CYS CYS A A 101 101 . 57.644  62.169 41.911 1.00 85.35  1 . C  ?  
ATOM   716  O    O    . CYS CYS CYS A A 101 101 . 58.750  61.732 42.248 1.00 85.10  1 . O  ?  
ATOM   717  CB   CB   . CYS CYS CYS A A 101 101 . 56.815  60.502 40.256 1.00 74.89  1 . C  ?  
ATOM   718  SG   SG   . CYS CYS CYS A A 101 101 . 55.969  59.887 41.667 1.00 81.27  1 . S  ?  
ATOM   719  N    N    . ASN ASN ASN A A 102 102 . 56.834  62.825 42.740 1.00 89.74  1 . N  ?  
ATOM   720  CA   CA   . ASN ASN ASN A A 102 102 . 57.297  63.378 44.010 1.00 91.05  1 . C  ?  
ATOM   721  C    C    . ASN ASN ASN A A 102 102 . 56.958  62.476 45.189 1.00 78.77  1 . C  ?  
ATOM   722  O    O    . ASN ASN ASN A A 102 102 . 56.833  62.946 46.332 1.00 80.77  1 . O  ?  
ATOM   723  CB   CB   . ASN ASN ASN A A 102 102 . 56.716  64.780 44.205 1.00 85.30  1 . C  ?  
ATOM   724  CG   CG   . ASN ASN ASN A A 102 102 . 56.892  65.644 42.974 1.00 88.47  1 . C  ?  
ATOM   725  OD1  OD1  . ASN ASN ASN A A 102 102 . 58.011  66.059 42.647 1.00 89.13  1 . O  ?  
ATOM   726  ND2  ND2  . ASN ASN ASN A A 102 102 . 55.792  65.903 42.270 1.00 86.63  1 . N  ?  
ATOM   727  N    N    . ASP ASP ASP A A 103 103 . 56.821  61.184 44.930 1.00 59.88  1 . N  ?  
ATOM   728  CA   CA   . ASP ASP ASP A A 103 103 . 56.314  60.238 45.908 1.00 52.43  1 . C  ?  
ATOM   729  C    C    . ASP ASP ASP A A 103 103 . 57.391  59.183 46.161 1.00 50.79  1 . C  ?  
ATOM   730  O    O    . ASP ASP ASP A A 103 103 . 57.829  58.503 45.226 1.00 47.01  1 . O  ?  
ATOM   731  CB   CB   . ASP ASP ASP A A 103 103 . 55.017  59.630 45.381 1.00 50.24  1 . C  ?  
ATOM   732  CG   CG   . ASP ASP ASP A A 103 103 . 54.267  58.872 46.429 1.00 59.49  1 . C  ?  
ATOM   733  OD1  OD1  . ASP ASP ASP A A 103 103 . 54.777  57.819 46.875 1.00 56.85  1 . O  ?  
ATOM   734  OD2  OD2  . ASP ASP ASP A A 103 103 . 53.154  59.316 46.793 1.00 69.41  1 . O  ?  
ATOM   735  N    N    . LEU LEU LEU A A 104 104 . 57.843  59.070 47.415 1.00 43.80  1 . N  ?  
ATOM   736  CA   CA   . LEU LEU LEU A A 104 104 . 58.905  58.116 47.726 1.00 45.31  1 . C  ?  
ATOM   737  C    C    . LEU LEU LEU A A 104 104 . 58.538  56.714 47.262 1.00 47.98  1 . C  ?  
ATOM   738  O    O    . LEU LEU LEU A A 104 104 . 59.354  56.015 46.640 1.00 43.35  1 . O  ?  
ATOM   739  CB   CB   . LEU LEU LEU A A 104 104 . 59.195  58.104 49.226 1.00 43.14  1 . C  ?  
ATOM   740  CG   CG   . LEU LEU LEU A A 104 104 . 60.186  57.010 49.637 1.00 41.04  1 . C  ?  
ATOM   741  CD1  CD1  . LEU LEU LEU A A 104 104 . 61.520  57.189 48.910 1.00 40.21  1 . C  ?  
ATOM   742  CD2  CD2  . LEU LEU LEU A A 104 104 . 60.397  57.003 51.142 1.00 38.60  1 . C  ?  
ATOM   743  N    N    . CYS CYS CYS A A 105 105 . 57.305  56.300 47.553 1.00 41.63  1 . N  ?  
ATOM   744  CA   CA   . CYS CYS CYS A A 105 105 . 56.823  54.975 47.202 1.00 38.30  1 . C  ?  
ATOM   745  C    C    . CYS CYS CYS A A 105 105 . 56.995  54.698 45.714 1.00 39.46  1 . C  ?  
ATOM   746  O    O    . CYS CYS CYS A A 105 105 . 57.533  53.659 45.322 1.00 49.06  1 . O  ?  
ATOM   747  CB   CB   . CYS CYS CYS A A 105 105 . 55.346  54.851 47.615 1.00 42.27  1 . C  ?  
ATOM   748  SG   SG   . CYS CYS CYS A A 105 105 . 54.803  53.168 47.678 1.00 76.18  1 . S  ?  
ATOM   749  O    O    . THR THR THR A A 106 106 . 58.382  54.851 41.930 1.00 41.85  1 . O  ?  
ATOM   750  N    N    . THR THR THR A A 106 106 . 56.537  55.609 44.867 1.00 41.86  1 . N  ?  
ATOM   751  CA   CA   . THR THR THR A A 106 106 . 56.593  55.372 43.431 1.00 39.53  1 . C  ?  
ATOM   752  C    C    . THR THR THR A A 106 106 . 58.000  55.552 42.877 1.00 43.06  1 . C  ?  
ATOM   753  CB   CB   . THR THR THR A A 106 106 . 55.622  56.314 42.721 1.00 42.76  1 . C  ?  
ATOM   754  OG1  OG1  . THR THR THR A A 106 106 . 54.332  56.196 43.334 1.00 50.71  1 . O  ?  
ATOM   755  CG2  CG2  . THR THR THR A A 106 106 . 55.510  55.977 41.241 1.00 40.37  1 . C  ?  
ATOM   756  N    N    . SER SER SER A A 107 107 . 58.777  56.479 43.448 1.00 38.85  1 . N  ?  
ATOM   757  CA   CA   . SER SER SER A A 107 107 . 60.137  56.711 42.971 1.00 44.81  1 . C  ?  
ATOM   758  C    C    . SER SER SER A A 107 107 . 61.011  55.501 43.249 1.00 42.76  1 . C  ?  
ATOM   759  O    O    . SER SER SER A A 107 107 . 61.672  54.981 42.343 1.00 38.86  1 . O  ?  
ATOM   760  CB   CB   . SER SER SER A A 107 107 . 60.745  57.956 43.628 1.00 43.40  1 . C  ?  
ATOM   761  OG   OG   . SER SER SER A A 107 107 . 59.969  59.112 43.362 1.00 53.15  1 . O  ?  
ATOM   762  N    N    . ALA ALA ALA A A 108 108 . 61.017  55.040 44.503 1.00 41.83  1 . N  ?  
ATOM   763  CA   CA   . ALA ALA ALA A A 108 108 . 61.804  53.866 44.862 1.00 38.59  1 . C  ?  
ATOM   764  C    C    . ALA ALA ALA A A 108 108 . 61.415  52.652 44.019 1.00 37.52  1 . C  ?  
ATOM   765  O    O    . ALA ALA ALA A A 108 108 . 62.288  51.907 43.560 1.00 37.44  1 . O  ?  
ATOM   766  CB   CB   . ALA ALA ALA A A 108 108 . 61.654  53.580 46.353 1.00 33.70  1 . C  ?  
ATOM   767  N    N    . LEU LEU LEU A A 109 109 . 60.117  52.459 43.760 1.00 37.59  1 . N  ?  
ATOM   768  CA   CA   . LEU LEU LEU A A 109 109 . 59.700  51.305 42.960 1.00 39.09  1 . C  ?  
ATOM   769  C    C    . LEU LEU LEU A A 109 109 . 60.145  51.446 41.508 1.00 38.15  1 . C  ?  
ATOM   770  O    O    . LEU LEU LEU A A 109 109 . 60.639  50.485 40.903 1.00 42.34  1 . O  ?  
ATOM   771  CB   CB   . LEU LEU LEU A A 109 109 . 58.184  51.111 43.038 1.00 39.97  1 . C  ?  
ATOM   772  CG   CG   . LEU LEU LEU A A 109 109 . 57.628  49.957 42.192 1.00 39.29  1 . C  ?  
ATOM   773  CD1  CD1  . LEU LEU LEU A A 109 109 . 58.218  48.639 42.636 1.00 33.44  1 . C  ?  
ATOM   774  CD2  CD2  . LEU LEU LEU A A 109 109 . 56.125  49.896 42.265 1.00 33.12  1 . C  ?  
ATOM   775  N    N    . GLN GLN GLN A A 110 110 . 59.945  52.629 40.922 1.00 39.98  1 . N  ?  
ATOM   776  CA   CA   . GLN GLN GLN A A 110 110 . 60.471  52.927 39.588 1.00 42.69  1 . C  ?  
ATOM   777  C    C    . GLN GLN GLN A A 110 110 . 61.968  52.638 39.494 1.00 40.50  1 . C  ?  
ATOM   778  O    O    . GLN GLN GLN A A 110 110 . 62.451  52.086 38.500 1.00 39.33  1 . O  ?  
ATOM   779  CB   CB   . GLN GLN GLN A A 110 110 . 60.203  54.395 39.246 1.00 40.83  1 . C  ?  
ATOM   780  CG   CG   . GLN GLN GLN A A 110 110 . 60.595  54.809 37.842 1.00 42.27  1 . C  ?  
ATOM   781  CD   CD   . GLN GLN GLN A A 110 110 . 60.461  56.309 37.631 1.00 53.19  1 . C  ?  
ATOM   782  OE1  OE1  . GLN GLN GLN A A 110 110 . 60.115  57.047 38.554 1.00 53.60  1 . O  ?  
ATOM   783  NE2  NE2  . GLN GLN GLN A A 110 110 . 60.747  56.767 36.418 1.00 59.24  1 . N  ?  
ATOM   784  N    N    . PHE PHE PHE A A 111 111 . 62.717  53.005 40.523 1.00 34.89  1 . N  ?  
ATOM   785  CA   CA   . PHE PHE PHE A A 111 111 . 64.144  52.772 40.488 1.00 41.23  1 . C  ?  
ATOM   786  C    C    . PHE PHE PHE A A 111 111 . 64.447  51.277 40.471 1.00 42.37  1 . C  ?  
ATOM   787  O    O    . PHE PHE PHE A A 111 111 . 65.210  50.803 39.620 1.00 39.49  1 . O  ?  
ATOM   788  CB   CB   . PHE PHE PHE A A 111 111 . 64.794  53.467 41.677 1.00 44.54  1 . C  ?  
ATOM   789  CG   CG   . PHE PHE PHE A A 111 111 . 66.283  53.368 41.702 1.00 40.03  1 . C  ?  
ATOM   790  CD1  CD1  . PHE PHE PHE A A 111 111 . 67.055  54.214 40.928 1.00 38.86  1 . C  ?  
ATOM   791  CD2  CD2  . PHE PHE PHE A A 111 111 . 66.908  52.446 42.523 1.00 38.37  1 . C  ?  
ATOM   792  CE1  CE1  . PHE PHE PHE A A 111 111 . 68.433  54.139 40.966 1.00 41.34  1 . C  ?  
ATOM   793  CE2  CE2  . PHE PHE PHE A A 111 111 . 68.282  52.364 42.575 1.00 39.44  1 . C  ?  
ATOM   794  CZ   CZ   . PHE PHE PHE A A 111 111 . 69.049  53.210 41.794 1.00 40.80  1 . C  ?  
ATOM   795  N    N    . ARG ARG ARG A A 112 112 . 63.821  50.509 41.374 1.00 37.36  1 . N  ?  
ATOM   796  CA   CA   . ARG ARG ARG A A 112 112 . 64.134  49.087 41.464 1.00 37.28  1 . C  ?  
ATOM   797  C    C    . ARG ARG ARG A A 112 112 . 63.756  48.352 40.185 1.00 41.53  1 . C  ?  
ATOM   798  O    O    . ARG ARG ARG A A 112 112 . 64.539  47.545 39.659 1.00 42.68  1 . O  ?  
ATOM   799  CB   CB   . ARG ARG ARG A A 112 112 . 63.433  48.446 42.663 1.00 40.12  1 . C  ?  
ATOM   800  CG   CG   . ARG ARG ARG A A 112 112 . 63.634  46.920 42.730 1.00 35.13  1 . C  ?  
ATOM   801  CD   CD   . ARG ARG ARG A A 112 112 . 63.296  46.366 44.094 1.00 34.82  1 . C  ?  
ATOM   802  NE   NE   . ARG ARG ARG A A 112 112 . 61.861  46.360 44.360 1.00 37.41  1 . N  ?  
ATOM   803  CZ   CZ   . ARG ARG ARG A A 112 112 . 60.979  45.668 43.650 1.00 36.42  1 . C  ?  
ATOM   804  NH1  NH1  . ARG ARG ARG A A 112 112 . 61.378  44.945 42.616 1.00 34.04  1 . N  ?  
ATOM   805  NH2  NH2  . ARG ARG ARG A A 112 112 . 59.698  45.706 43.969 1.00 37.06  1 . N  ?  
ATOM   806  N    N    . LEU LEU LEU A A 113 113 . 62.546  48.590 39.680 1.00 39.82  1 . N  ?  
ATOM   807  CA   CA   . LEU LEU LEU A A 113 113 . 62.102  47.823 38.526 1.00 38.53  1 . C  ?  
ATOM   808  C    C    . LEU LEU LEU A A 113 113 . 62.965  48.125 37.312 1.00 35.55  1 . C  ?  
ATOM   809  O    O    . LEU LEU LEU A A 113 113 . 63.332  47.211 36.566 1.00 37.13  1 . O  ?  
ATOM   810  CB   CB   . LEU LEU LEU A A 113 113 . 60.626  48.103 38.230 1.00 38.29  1 . C  ?  
ATOM   811  CG   CG   . LEU LEU LEU A A 113 113 . 59.586  47.559 39.217 1.00 42.39  1 . C  ?  
ATOM   812  CD1  CD1  . LEU LEU LEU A A 113 113 . 58.167  47.973 38.806 1.00 35.13  1 . C  ?  
ATOM   813  CD2  CD2  . LEU LEU LEU A A 113 113 . 59.684  46.059 39.324 1.00 33.71  1 . C  ?  
ATOM   814  N    N    . LEU LEU LEU A A 114 114 . 63.289  49.399 37.089 1.00 35.21  1 . N  ?  
ATOM   815  CA   CA   . LEU LEU LEU A A 114 114 . 64.160  49.753 35.971 1.00 38.83  1 . C  ?  
ATOM   816  C    C    . LEU LEU LEU A A 114 114 . 65.541  49.126 36.134 1.00 34.88  1 . C  ?  
ATOM   817  O    O    . LEU LEU LEU A A 114 114 . 66.039  48.467 35.217 1.00 37.09  1 . O  ?  
ATOM   818  CB   CB   . LEU LEU LEU A A 114 114 . 64.267  51.275 35.828 1.00 41.78  1 . C  ?  
ATOM   819  CG   CG   . LEU LEU LEU A A 114 114 . 62.998  52.037 35.400 1.00 43.97  1 . C  ?  
ATOM   820  CD1  CD1  . LEU LEU LEU A A 114 114 . 63.248  53.536 35.382 1.00 42.24  1 . C  ?  
ATOM   821  CD2  CD2  . LEU LEU LEU A A 114 114 . 62.517  51.565 34.048 1.00 44.63  1 . C  ?  
ATOM   822  N    N    . ARG ARG ARG A A 115 115 . 66.167  49.298 37.306 1.00 33.28  1 . N  ?  
ATOM   823  CA   CA   . ARG ARG ARG A A 115 115 . 67.509  48.747 37.507 1.00 38.93  1 . C  ?  
ATOM   824  C    C    . ARG ARG ARG A A 115 115 . 67.523  47.234 37.342 1.00 38.30  1 . C  ?  
ATOM   825  O    O    . ARG ARG ARG A A 115 115 . 68.414  46.690 36.680 1.00 34.05  1 . O  ?  
ATOM   826  CB   CB   . ARG ARG ARG A A 115 115 . 68.070  49.134 38.880 1.00 39.42  1 . C  ?  
ATOM   827  CG   CG   . ARG ARG ARG A A 115 115 . 68.476  50.612 39.000 1.00 38.31  1 . C  ?  
ATOM   828  CD   CD   . ARG ARG ARG A A 115 115 . 69.471  51.033 37.918 1.00 38.80  1 . C  ?  
ATOM   829  NE   NE   . ARG ARG ARG A A 115 115 . 70.035  52.343 38.225 1.00 39.93  1 . N  ?  
ATOM   830  CZ   CZ   . ARG ARG ARG A A 115 115 . 71.049  52.555 39.065 1.00 40.65  1 . C  ?  
ATOM   831  NH1  NH1  . ARG ARG ARG A A 115 115 . 71.642  51.532 39.683 1.00 34.21  1 . N  ?  
ATOM   832  NH2  NH2  . ARG ARG ARG A A 115 115 . 71.464  53.801 39.295 1.00 38.51  1 . N  ?  
ATOM   833  N    N    . GLN GLN GLN A A 116 116 . 66.532  46.533 37.914 1.00 37.48  1 . N  ?  
ATOM   834  CA   CA   . GLN GLN GLN A A 116 116 . 66.531  45.076 37.806 1.00 33.47  1 . C  ?  
ATOM   835  C    C    . GLN GLN GLN A A 116 116 . 66.413  44.631 36.361 1.00 36.06  1 . C  ?  
ATOM   836  O    O    . GLN GLN GLN A A 116 116 . 66.895  43.552 36.006 1.00 39.38  1 . O  ?  
ATOM   837  CB   CB   . GLN GLN GLN A A 116 116 . 65.408  44.475 38.643 1.00 34.85  1 . C  ?  
ATOM   838  CG   CG   . GLN GLN GLN A A 116 116 . 65.690  44.497 40.125 1.00 35.65  1 . C  ?  
ATOM   839  CD   CD   . GLN GLN GLN A A 116 116 . 64.536  43.952 40.933 1.00 36.29  1 . C  ?  
ATOM   840  OE1  OE1  . GLN GLN GLN A A 116 116 . 63.392  44.365 40.751 1.00 37.73  1 . O  ?  
ATOM   841  NE2  NE2  . GLN GLN GLN A A 116 116 . 64.829  43.028 41.837 1.00 33.16  1 . N  ?  
ATOM   842  N    N    . HIS HIS HIS A A 117 117 . 65.814  45.457 35.507 1.00 35.94  1 . N  ?  
ATOM   843  CA   CA   . HIS HIS HIS A A 117 117 . 65.643  45.126 34.101 1.00 37.40  1 . C  ?  
ATOM   844  C    C    . HIS HIS HIS A A 117 117 . 66.727  45.728 33.217 1.00 42.51  1 . C  ?  
ATOM   845  O    O    . HIS HIS HIS A A 117 117 . 66.639  45.625 31.990 1.00 42.42  1 . O  ?  
ATOM   846  CB   CB   . HIS HIS HIS A A 117 117 . 64.257  45.559 33.622 1.00 41.91  1 . C  ?  
ATOM   847  CG   CG   . HIS HIS HIS A A 117 117 . 63.162  44.651 34.092 1.00 42.31  1 . C  ?  
ATOM   848  ND1  ND1  . HIS HIS HIS A A 117 117 . 62.503  43.783 33.250 1.00 37.01  1 . N  ?  
ATOM   849  CD2  CD2  . HIS HIS HIS A A 117 117 . 62.640  44.449 35.326 1.00 36.50  1 . C  ?  
ATOM   850  CE1  CE1  . HIS HIS HIS A A 117 117 . 61.613  43.097 33.943 1.00 40.48  1 . C  ?  
ATOM   851  NE2  NE2  . HIS HIS HIS A A 117 117 . 61.679  43.481 35.205 1.00 39.24  1 . N  ?  
ATOM   852  N    N    . GLY GLY GLY A A 118 118 . 67.750  46.345 33.806 1.00 43.03  1 . N  ?  
ATOM   853  CA   CA   . GLY GLY GLY A A 118 118 . 68.916  46.761 33.063 1.00 41.43  1 . C  ?  
ATOM   854  C    C    . GLY GLY GLY A A 118 118 . 68.977  48.229 32.699 1.00 44.61  1 . C  ?  
ATOM   855  O    O    . GLY GLY GLY A A 118 118 . 70.042  48.682 32.257 1.00 46.91  1 . O  ?  
ATOM   856  N    N    . PHE PHE PHE A A 119 119 . 67.883  48.981 32.867 1.00 43.45  1 . N  ?  
ATOM   857  CA   CA   . PHE PHE PHE A A 119 119 . 67.851  50.397 32.509 1.00 40.17  1 . C  ?  
ATOM   858  C    C    . PHE PHE PHE A A 119 119 . 68.577  51.215 33.567 1.00 46.03  1 . C  ?  
ATOM   859  O    O    . PHE PHE PHE A A 119 119 . 68.169  51.237 34.733 1.00 45.64  1 . O  ?  
ATOM   860  CB   CB   . PHE PHE PHE A A 119 119 . 66.415  50.904 32.356 1.00 41.36  1 . C  ?  
ATOM   861  CG   CG   . PHE PHE PHE A A 119 119 . 65.596  50.132 31.358 1.00 42.58  1 . C  ?  
ATOM   862  CD1  CD1  . PHE PHE PHE A A 119 119 . 65.672  50.415 30.016 1.00 41.45  1 . C  ?  
ATOM   863  CD2  CD2  . PHE PHE PHE A A 119 119 . 64.753  49.119 31.771 1.00 42.95  1 . C  ?  
ATOM   864  CE1  CE1  . PHE PHE PHE A A 119 119 . 64.929  49.704 29.095 1.00 45.09  1 . C  ?  
ATOM   865  CE2  CE2  . PHE PHE PHE A A 119 119 . 64.003  48.412 30.857 1.00 46.16  1 . C  ?  
ATOM   866  CZ   CZ   . PHE PHE PHE A A 119 119 . 64.092  48.706 29.513 1.00 47.70  1 . C  ?  
ATOM   867  N    N    . ASN ASN ASN A A 120 120 . 69.619  51.934 33.146 1.00 45.54  1 . N  ?  
ATOM   868  CA   CA   . ASN ASN ASN A A 120 120 . 70.500  52.635 34.071 1.00 40.79  1 . C  ?  
ATOM   869  C    C    . ASN ASN ASN A A 120 120 . 69.869  53.957 34.507 1.00 42.40  1 . C  ?  
ATOM   870  O    O    . ASN ASN ASN A A 120 120 . 70.396  55.043 34.291 1.00 46.91  1 . O  ?  
ATOM   871  CB   CB   . ASN ASN ASN A A 120 120 . 71.860  52.833 33.414 1.00 41.39  1 . C  ?  
ATOM   872  CG   CG   . ASN ASN ASN A A 120 120 . 72.908  53.381 34.363 1.00 41.39  1 . C  ?  
ATOM   873  OD1  OD1  . ASN ASN ASN A A 120 120 . 72.696  53.468 35.568 1.00 41.80  1 . O  ?  
ATOM   874  ND2  ND2  . ASN ASN ASN A A 120 120 . 74.065  53.738 33.814 1.00 42.26  1 . N  ?  
ATOM   875  N    N    . ILE ILE ILE A A 121 121 . 68.707  53.854 35.143 1.00 46.75  1 . N  ?  
ATOM   876  CA   CA   . ILE ILE ILE A A 121 121 . 68.071  55.058 35.662 1.00 46.09  1 . C  ?  
ATOM   877  C    C    . ILE ILE ILE A A 121 121 . 68.977  55.710 36.694 1.00 40.07  1 . C  ?  
ATOM   878  O    O    . ILE ILE ILE A A 121 121 . 69.663  55.029 37.462 1.00 40.69  1 . O  ?  
ATOM   879  CB   CB   . ILE ILE ILE A A 121 121 . 66.701  54.759 36.288 1.00 46.59  1 . C  ?  
ATOM   880  CG1  CG1  . ILE ILE ILE A A 121 121 . 66.154  56.053 36.926 1.00 44.80  1 . C  ?  
ATOM   881  CG2  CG2  . ILE ILE ILE A A 121 121 . 66.833  53.590 37.283 1.00 37.10  1 . C  ?  
ATOM   882  CD1  CD1  . ILE ILE ILE A A 121 121 . 64.694  56.004 37.294 1.00 44.55  1 . C  ?  
ATOM   883  N    N    . SER SER SER A A 122 122 . 68.943  57.061 36.743 1.00 43.35  1 . N  ?  
ATOM   884  CA   CA   . SER SER SER A A 122 122 . 69.838  57.820 37.610 1.00 44.08  1 . C  ?  
ATOM   885  C    C    . SER SER SER A A 122 122 . 69.352  57.778 39.054 1.00 45.77  1 . C  ?  
ATOM   886  O    O    . SER SER SER A A 122 122 . 68.158  57.932 39.314 1.00 47.39  1 . O  ?  
ATOM   887  CB   CB   . SER SER SER A A 122 122 . 69.935  59.278 37.157 1.00 49.84  1 . C  ?  
ATOM   888  OG   OG   . SER SER SER A A 122 122 . 70.483  60.101 38.188 1.00 47.36  1 . O  ?  
ATOM   889  N    N    . PRO PRO PRO A A 123 123 . 70.259  57.594 40.014 1.00 42.20  1 . N  ?  
ATOM   890  CA   CA   . PRO PRO PRO A A 123 123 . 69.868  57.672 41.424 1.00 45.58  1 . C  ?  
ATOM   891  C    C    . PRO PRO PRO A A 123 123 . 69.528  59.082 41.873 1.00 49.02  1 . C  ?  
ATOM   892  O    O    . PRO PRO PRO A A 123 123 . 69.188  59.291 43.044 1.00 48.20  1 . O  ?  
ATOM   893  CB   CB   . PRO PRO PRO A A 123 123 . 71.112  57.139 42.152 1.00 43.07  1 . C  ?  
ATOM   894  CG   CG   . PRO PRO PRO A A 123 123 . 72.217  57.500 41.272 1.00 43.73  1 . C  ?  
ATOM   895  CD   CD   . PRO PRO PRO A A 123 123 . 71.708  57.432 39.853 1.00 41.66  1 . C  ?  
ATOM   896  N    N    . GLU GLU GLU A A 124 124 . 69.640  60.067 40.990 1.00 51.45  1 . N  ?  
ATOM   897  CA   CA   . GLU GLU GLU A A 124 124 . 69.286  61.417 41.389 1.00 54.40  1 . C  ?  
ATOM   898  C    C    . GLU GLU GLU A A 124 124 . 67.797  61.557 41.636 1.00 53.41  1 . C  ?  
ATOM   899  O    O    . GLU GLU GLU A A 124 124 . 67.385  62.549 42.248 1.00 53.47  1 . O  ?  
ATOM   900  CB   CB   . GLU GLU GLU A A 124 124 . 69.756  62.413 40.331 1.00 58.38  1 . C  ?  
ATOM   901  CG   CG   . GLU GLU GLU A A 124 124 . 71.264  62.329 40.068 1.00 67.37  1 . C  ?  
ATOM   902  CD   CD   . GLU GLU GLU A A 124 124 . 72.051  63.423 40.767 1.00 74.16  1 . C  ?  
ATOM   903  OE1  OE1  . GLU GLU GLU A A 124 124 . 71.854  64.610 40.416 1.00 91.11  1 . O  ?  
ATOM   904  OE2  OE2  . GLU GLU GLU A A 124 124 . 72.862  63.098 41.664 1.00 74.58  1 . O  ?  
ATOM   905  N    N    . ILE ILE ILE A A 125 125 . 66.996  60.579 41.198 1.00 52.30  1 . N  ?  
ATOM   906  CA   CA   . ILE ILE ILE A A 125 125 . 65.583  60.562 41.529 1.00 47.35  1 . C  ?  
ATOM   907  C    C    . ILE ILE ILE A A 125 125 . 65.373  60.577 43.032 1.00 49.76  1 . C  ?  
ATOM   908  O    O    . ILE ILE ILE A A 125 125 . 64.314  60.995 43.498 1.00 50.89  1 . O  ?  
ATOM   909  CB   CB   . ILE ILE ILE A A 125 125 . 64.885  59.349 40.889 1.00 52.33  1 . C  ?  
ATOM   910  CG1  CG1  . ILE ILE ILE A A 125 125 . 63.364  59.488 41.036 1.00 51.36  1 . C  ?  
ATOM   911  CG2  CG2  . ILE ILE ILE A A 125 125 . 65.372  58.034 41.516 1.00 46.34  1 . C  ?  
ATOM   912  CD1  CD1  . ILE ILE ILE A A 125 125 . 62.580  58.403 40.337 1.00 48.76  1 . C  ?  
ATOM   913  N    N    . PHE PHE PHE A A 126 126 . 66.367  60.153 43.809 1.00 49.10  1 . N  ?  
ATOM   914  CA   CA   . PHE PHE PHE A A 126 126 . 66.239  60.133 45.259 1.00 50.85  1 . C  ?  
ATOM   915  C    C    . PHE PHE PHE A A 126 126 . 66.696  61.423 45.942 1.00 51.68  1 . C  ?  
ATOM   916  O    O    . PHE PHE PHE A A 126 126 . 66.499  61.562 47.155 1.00 53.04  1 . O  ?  
ATOM   917  CB   CB   . PHE PHE PHE A A 126 126 . 67.028  58.948 45.851 1.00 44.54  1 . C  ?  
ATOM   918  CG   CG   . PHE PHE PHE A A 126 126 . 66.473  57.593 45.477 1.00 47.62  1 . C  ?  
ATOM   919  CD1  CD1  . PHE PHE PHE A A 126 126 . 65.263  57.152 46.005 1.00 48.04  1 . C  ?  
ATOM   920  CD2  CD2  . PHE PHE PHE A A 126 126 . 67.171  56.749 44.616 1.00 44.76  1 . C  ?  
ATOM   921  CE1  CE1  . PHE PHE PHE A A 126 126 . 64.741  55.886 45.674 1.00 42.71  1 . C  ?  
ATOM   922  CE2  CE2  . PHE PHE PHE A A 126 126 . 66.663  55.494 44.272 1.00 49.82  1 . C  ?  
ATOM   923  CZ   CZ   . PHE PHE PHE A A 126 126 . 65.435  55.062 44.799 1.00 41.89  1 . C  ?  
ATOM   924  N    N    . SER SER SER A A 127 127 . 67.318  62.366 45.229 1.00 50.63  1 . N  ?  
ATOM   925  CA   CA   . SER SER SER A A 127 127 . 67.854  63.540 45.922 1.00 55.58  1 . C  ?  
ATOM   926  C    C    . SER SER SER A A 127 127 . 66.742  64.392 46.544 1.00 51.00  1 . C  ?  
ATOM   927  O    O    . SER SER SER A A 127 127 . 66.902  64.900 47.662 1.00 48.57  1 . O  ?  
ATOM   928  CB   CB   . SER SER SER A A 127 127 . 68.710  64.375 44.974 1.00 56.12  1 . C  ?  
ATOM   929  OG   OG   . SER SER SER A A 127 127 . 67.929  64.839 43.893 1.00 62.97  1 . O  ?  
ATOM   930  N    N    . LYS LYS LYS A A 128 128 . 65.595  64.529 45.861 1.00 46.14  1 . N  ?  
ATOM   931  CA   CA   . LYS LYS LYS A A 128 128 . 64.495  65.303 46.440 1.00 50.53  1 . C  ?  
ATOM   932  C    C    . LYS LYS LYS A A 128 128 . 63.993  64.744 47.772 1.00 52.60  1 . C  ?  
ATOM   933  O    O    . LYS LYS LYS A A 128 128 . 63.220  65.431 48.447 1.00 51.79  1 . O  ?  
ATOM   934  CB   CB   . LYS LYS LYS A A 128 128 . 63.316  65.412 45.462 1.00 42.29  1 . C  ?  
ATOM   935  CG   CG   . LYS LYS LYS A A 128 128 . 62.440  64.175 45.397 1.00 55.31  1 . C  ?  
ATOM   936  CD   CD   . LYS LYS LYS A A 128 128 . 61.209  64.396 44.512 1.00 62.78  1 . C  ?  
ATOM   937  CE   CE   . LYS LYS LYS A A 128 128 . 61.580  64.415 43.043 1.00 66.94  1 . C  ?  
ATOM   938  NZ   NZ   . LYS LYS LYS A A 128 128 . 62.168  63.108 42.609 1.00 69.77  1 . N  ?  
ATOM   939  N    N    . PHE PHE PHE A A 129 129 . 64.402  63.537 48.173 1.00 45.91  1 . N  ?  
ATOM   940  CA   CA   . PHE PHE PHE A A 129 129 . 64.026  62.980 49.466 1.00 43.65  1 . C  ?  
ATOM   941  C    C    . PHE PHE PHE A A 129 129 . 65.137  63.098 50.501 1.00 47.81  1 . C  ?  
ATOM   942  O    O    . PHE PHE PHE A A 129 129 . 65.041  62.502 51.582 1.00 46.65  1 . O  ?  
ATOM   943  CB   CB   . PHE PHE PHE A A 129 129 . 63.597  61.512 49.317 1.00 47.63  1 . C  ?  
ATOM   944  CG   CG   . PHE PHE PHE A A 129 129 . 62.500  61.306 48.311 1.00 48.07  1 . C  ?  
ATOM   945  CD1  CD1  . PHE PHE PHE A A 129 129 . 61.198  61.654 48.608 1.00 45.19  1 . C  ?  
ATOM   946  CD2  CD2  . PHE PHE PHE A A 129 129 . 62.773  60.787 47.060 1.00 48.08  1 . C  ?  
ATOM   947  CE1  CE1  . PHE PHE PHE A A 129 129 . 60.183  61.485 47.666 1.00 48.35  1 . C  ?  
ATOM   948  CE2  CE2  . PHE PHE PHE A A 129 129 . 61.756  60.622 46.117 1.00 47.68  1 . C  ?  
ATOM   949  CZ   CZ   . PHE PHE PHE A A 129 129 . 60.468  60.969 46.423 1.00 48.78  1 . C  ?  
ATOM   950  N    N    . GLN GLN GLN A A 130 130 . 66.188  63.851 50.211 1.00 55.00  1 . N  ?  
ATOM   951  CA   CA   . GLN GLN GLN A A 130 130 . 67.302  63.966 51.135 1.00 58.55  1 . C  ?  
ATOM   952  C    C    . GLN GLN GLN A A 130 130 . 67.542  65.425 51.491 1.00 61.09  1 . C  ?  
ATOM   953  O    O    . GLN GLN GLN A A 130 130 . 67.134  66.339 50.769 1.00 60.12  1 . O  ?  
ATOM   954  CB   CB   . GLN GLN GLN A A 130 130 . 68.565  63.333 50.545 1.00 60.52  1 . C  ?  
ATOM   955  CG   CG   . GLN GLN GLN A A 130 130 . 68.409  61.840 50.319 1.00 60.04  1 . C  ?  
ATOM   956  CD   CD   . GLN GLN GLN A A 130 130 . 69.568  61.220 49.541 1.00 59.25  1 . C  ?  
ATOM   957  OE1  OE1  . GLN GLN GLN A A 130 130 . 69.662  61.367 48.323 1.00 63.10  1 . O  ?  
ATOM   958  NE2  NE2  . GLN GLN GLN A A 130 130 . 70.438  60.511 50.241 1.00 55.44  1 . N  ?  
ATOM   959  N    N    . ASP ASP ASP A A 131 131 . 68.188  65.625 52.641 1.00 66.93  1 . N  ?  
ATOM   960  CA   CA   . ASP ASP ASP A A 131 131 . 68.613  66.945 53.094 1.00 70.31  1 . C  ?  
ATOM   961  C    C    . ASP ASP ASP A A 131 131 . 69.910  67.367 52.407 1.00 77.12  1 . C  ?  
ATOM   962  O    O    . ASP ASP ASP A A 131 131 . 70.087  67.134 51.205 1.00 75.23  1 . O  ?  
ATOM   963  CB   CB   . ASP ASP ASP A A 131 131 . 68.783  66.963 54.625 1.00 70.81  1 . C  ?  
ATOM   964  CG   CG   . ASP ASP ASP A A 131 131 . 69.927  66.062 55.125 1.00 77.55  1 . C  ?  
ATOM   965  OD1  OD1  . ASP ASP ASP A A 131 131 . 70.833  65.711 54.334 1.00 79.58  1 . O  ?  
ATOM   966  OD2  OD2  . ASP ASP ASP A A 131 131 . 69.933  65.718 56.328 1.00 79.31  1 . O  ?  
ATOM   967  N    N    . GLU GLU GLU A A 132 132 . 70.822  67.975 53.178 1.00 84.39  1 . N  ?  
ATOM   968  CA   CA   . GLU GLU GLU A A 132 132 . 72.115  68.435 52.670 1.00 82.70  1 . C  ?  
ATOM   969  C    C    . GLU GLU GLU A A 132 132 . 73.097  67.283 52.493 1.00 85.99  1 . C  ?  
ATOM   970  O    O    . GLU GLU GLU A A 132 132 . 73.515  66.975 51.371 1.00 89.42  1 . O  ?  
ATOM   971  CB   CB   . GLU GLU GLU A A 132 132 . 72.712  69.475 53.620 1.00 85.62  1 . C  ?  
ATOM   972  CG   CG   . GLU GLU GLU A A 132 132 . 71.689  70.264 54.420 1.00 90.82  1 . C  ?  
ATOM   973  CD   CD   . GLU GLU GLU A A 132 132 . 70.701  71.007 53.541 1.00 96.65  1 . C  ?  
ATOM   974  OE1  OE1  . GLU GLU GLU A A 132 132 . 70.490  70.583 52.380 1.00 92.66  1 . O  ?  
ATOM   975  OE2  OE2  . GLU GLU GLU A A 132 132 . 70.132  72.016 54.018 1.00 103.57 1 . O  ?  
ATOM   976  N    N    . ASN ASN ASN A A 133 133 . 73.469  66.627 53.597 1.00 83.40  1 . N  ?  
ATOM   977  CA   CA   . ASN ASN ASN A A 133 133 . 74.525  65.619 53.585 1.00 83.14  1 . C  ?  
ATOM   978  C    C    . ASN ASN ASN A A 133 133 . 74.195  64.446 52.672 1.00 84.90  1 . C  ?  
ATOM   979  O    O    . ASN ASN ASN A A 133 133 . 74.952  63.468 52.612 1.00 80.94  1 . O  ?  
ATOM   980  CB   CB   . ASN ASN ASN A A 133 133 . 74.788  65.079 54.995 1.00 85.84  1 . C  ?  
ATOM   981  CG   CG   . ASN ASN ASN A A 133 133 . 74.660  66.141 56.070 1.00 93.39  1 . C  ?  
ATOM   982  OD1  OD1  . ASN ASN ASN A A 133 133 . 74.503  67.336 55.782 1.00 92.87  1 . O  ?  
ATOM   983  ND2  ND2  . ASN ASN ASN A A 133 133 . 74.735  65.708 57.329 1.00 92.48  1 . N  ?  
ATOM   984  N    N    . GLY GLY GLY A A 134 134 . 73.076  64.530 51.961 1.00 85.93  1 . N  ?  
ATOM   985  CA   CA   . GLY GLY GLY A A 134 134 . 72.555  63.358 51.286 1.00 80.47  1 . C  ?  
ATOM   986  C    C    . GLY GLY GLY A A 134 134 . 72.099  62.318 52.281 1.00 73.97  1 . C  ?  
ATOM   987  O    O    . GLY GLY GLY A A 134 134 . 72.412  61.128 52.126 1.00 77.28  1 . O  ?  
ATOM   988  N    N    . LYS LYS LYS A A 135 135 . 71.410  62.747 53.329 1.00 68.06  1 . N  ?  
ATOM   989  CA   CA   . LYS LYS LYS A A 135 135 . 70.736  61.840 54.240 1.00 70.77  1 . C  ?  
ATOM   990  C    C    . LYS LYS LYS A A 135 135 . 69.232  61.989 54.054 1.00 62.18  1 . C  ?  
ATOM   991  O    O    . LYS LYS LYS A A 135 135 . 68.732  63.092 53.792 1.00 58.61  1 . O  ?  
ATOM   992  CB   CB   . LYS LYS LYS A A 135 135 . 71.158  62.107 55.684 1.00 70.10  1 . C  ?  
ATOM   993  CG   CG   . LYS LYS LYS A A 135 135 . 72.514  61.496 56.002 1.00 74.82  1 . C  ?  
ATOM   994  CD   CD   . LYS LYS LYS A A 135 135 . 73.106  62.070 57.268 1.00 85.70  1 . C  ?  
ATOM   995  CE   CE   . LYS LYS LYS A A 135 135 . 74.589  61.741 57.374 1.00 85.14  1 . C  ?  
ATOM   996  NZ   NZ   . LYS LYS LYS A A 135 135 . 75.295  62.738 58.232 1.00 91.35  1 . N  ?  
ATOM   997  N    N    . PHE PHE PHE A A 136 136 . 68.521  60.867 54.136 1.00 58.51  1 . N  ?  
ATOM   998  CA   CA   . PHE PHE PHE A A 136 136 . 67.086  60.881 53.879 1.00 49.37  1 . C  ?  
ATOM   999  C    C    . PHE PHE PHE A A 136 136 . 66.371  61.713 54.931 1.00 47.66  1 . C  ?  
ATOM   1000 O    O    . PHE PHE PHE A A 136 136 . 66.668  61.618 56.124 1.00 49.35  1 . O  ?  
ATOM   1001 CB   CB   . PHE PHE PHE A A 136 136 . 66.538  59.448 53.844 1.00 43.89  1 . C  ?  
ATOM   1002 CG   CG   . PHE PHE PHE A A 136 136 . 66.815  58.744 52.551 1.00 40.49  1 . C  ?  
ATOM   1003 CD1  CD1  . PHE PHE PHE A A 136 136 . 65.973  58.915 51.465 1.00 34.90  1 . C  ?  
ATOM   1004 CD2  CD2  . PHE PHE PHE A A 136 136 . 67.944  57.948 52.403 1.00 43.56  1 . C  ?  
ATOM   1005 CE1  CE1  . PHE PHE PHE A A 136 136 . 66.229  58.287 50.262 1.00 39.28  1 . C  ?  
ATOM   1006 CE2  CE2  . PHE PHE PHE A A 136 136 . 68.213  57.316 51.200 1.00 39.01  1 . C  ?  
ATOM   1007 CZ   CZ   . PHE PHE PHE A A 136 136 . 67.354  57.481 50.129 1.00 42.91  1 . C  ?  
ATOM   1008 N    N    . LYS LYS LYS A A 137 137 . 65.445  62.560 54.481 1.00 46.59  1 . N  ?  
ATOM   1009 CA   CA   . LYS LYS LYS A A 137 137 . 64.672  63.362 55.417 1.00 45.42  1 . C  ?  
ATOM   1010 C    C    . LYS LYS LYS A A 137 137 . 63.912  62.447 56.358 1.00 49.77  1 . C  ?  
ATOM   1011 O    O    . LYS LYS LYS A A 137 137 . 63.123  61.606 55.916 1.00 53.78  1 . O  ?  
ATOM   1012 CB   CB   . LYS LYS LYS A A 137 137 . 63.695  64.267 54.675 1.00 48.35  1 . C  ?  
ATOM   1013 CG   CG   . LYS LYS LYS A A 137 137 . 64.314  65.178 53.657 1.00 51.07  1 . C  ?  
ATOM   1014 CD   CD   . LYS LYS LYS A A 137 137 . 63.215  65.934 52.952 1.00 54.22  1 . C  ?  
ATOM   1015 CE   CE   . LYS LYS LYS A A 137 137 . 63.709  66.727 51.761 1.00 58.46  1 . C  ?  
ATOM   1016 NZ   NZ   . LYS LYS LYS A A 137 137 . 62.538  67.379 51.082 1.00 64.10  1 . N  ?  
ATOM   1017 N    N    . GLU GLU GLU A A 138 138 . 64.128  62.616 57.658 1.00 50.64  1 . N  ?  
ATOM   1018 CA   CA   . GLU GLU GLU A A 138 138 . 63.460  61.749 58.619 1.00 51.44  1 . C  ?  
ATOM   1019 C    C    . GLU GLU GLU A A 138 138 . 61.966  61.995 58.693 1.00 54.10  1 . C  ?  
ATOM   1020 O    O    . GLU GLU GLU A A 138 138 . 61.247  61.170 59.269 1.00 53.00  1 . O  ?  
ATOM   1021 CB   CB   . GLU GLU GLU A A 138 138 . 64.084  61.919 59.994 1.00 56.51  1 . C  ?  
ATOM   1022 CG   CG   . GLU GLU GLU A A 138 138 . 65.572  61.730 59.945 1.00 58.79  1 . C  ?  
ATOM   1023 CD   CD   . GLU GLU GLU A A 138 138 . 66.111  61.240 61.249 1.00 70.23  1 . C  ?  
ATOM   1024 OE1  OE1  . GLU GLU GLU A A 138 138 . 66.592  62.092 62.044 1.00 72.11  1 . O  ?  
ATOM   1025 OE2  OE2  . GLU GLU GLU A A 138 138 . 66.023  60.006 61.478 1.00 68.23  1 . O  ?  
ATOM   1026 N    N    . SER SER SER A A 139 139 . 61.480  63.106 58.138 1.00 54.08  1 . N  ?  
ATOM   1027 CA   CA   . SER SER SER A A 139 139 . 60.041  63.282 58.051 1.00 50.18  1 . C  ?  
ATOM   1028 C    C    . SER SER SER A A 139 139 . 59.382  62.151 57.265 1.00 49.88  1 . C  ?  
ATOM   1029 O    O    . SER SER SER A A 139 139 . 58.181  61.916 57.424 1.00 52.61  1 . O  ?  
ATOM   1030 CB   CB   . SER SER SER A A 139 139 . 59.723  64.627 57.410 1.00 46.80  1 . C  ?  
ATOM   1031 OG   OG   . SER SER SER A A 139 139 . 60.127  64.641 56.051 1.00 49.48  1 . O  ?  
ATOM   1032 N    N    . LEU LEU LEU A A 140 140 . 60.136  61.452 56.413 1.00 49.85  1 . N  ?  
ATOM   1033 CA   CA   . LEU LEU LEU A A 140 140 . 59.604  60.322 55.656 1.00 51.86  1 . C  ?  
ATOM   1034 C    C    . LEU LEU LEU A A 140 140 . 59.364  59.084 56.512 1.00 48.56  1 . C  ?  
ATOM   1035 O    O    . LEU LEU LEU A A 140 140 . 58.771  58.122 56.018 1.00 46.83  1 . O  ?  
ATOM   1036 CB   CB   . LEU LEU LEU A A 140 140 . 60.558  59.940 54.524 1.00 49.35  1 . C  ?  
ATOM   1037 CG   CG   . LEU LEU LEU A A 140 140 . 60.905  61.003 53.488 1.00 53.38  1 . C  ?  
ATOM   1038 CD1  CD1  . LEU LEU LEU A A 140 140 . 62.161  60.569 52.699 1.00 48.44  1 . C  ?  
ATOM   1039 CD2  CD2  . LEU LEU LEU A A 140 140 . 59.721  61.282 52.577 1.00 39.77  1 . C  ?  
ATOM   1040 N    N    . ALA ALA ALA A A 141 141 . 59.813  59.082 57.767 1.00 44.44  1 . N  ?  
ATOM   1041 CA   CA   . ALA ALA ALA A A 141 141 . 59.813  57.891 58.600 1.00 44.17  1 . C  ?  
ATOM   1042 C    C    . ALA ALA ALA A A 141 141 . 58.414  57.388 58.948 1.00 50.44  1 . C  ?  
ATOM   1043 O    O    . ALA ALA ALA A A 141 141 . 58.296  56.311 59.539 1.00 44.78  1 . O  ?  
ATOM   1044 CB   CB   . ALA ALA ALA A A 141 141 . 60.601  58.174 59.882 1.00 47.56  1 . C  ?  
ATOM   1045 N    N    . SER SER SER A A 142 142 . 57.364  58.136 58.611 1.00 47.13  1 . N  ?  
ATOM   1046 CA   CA   . SER SER SER A A 142 142 . 55.996  57.720 58.856 1.00 47.95  1 . C  ?  
ATOM   1047 C    C    . SER SER SER A A 142 142 . 55.279  57.283 57.579 1.00 51.40  1 . C  ?  
ATOM   1048 O    O    . SER SER SER A A 142 142 . 54.045  57.197 57.570 1.00 52.39  1 . O  ?  
ATOM   1049 CB   CB   . SER SER SER A A 142 142 . 55.220  58.853 59.544 1.00 47.57  1 . C  ?  
ATOM   1050 OG   OG   . SER SER SER A A 142 142 . 55.306  60.060 58.800 1.00 48.46  1 . O  ?  
ATOM   1051 N    N    . ASP ASP ASP A A 143 143 . 56.021  57.009 56.509 1.00 45.18  1 . N  ?  
ATOM   1052 CA   CA   . ASP ASP ASP A A 143 143 . 55.461  56.635 55.212 1.00 39.30  1 . C  ?  
ATOM   1053 C    C    . ASP ASP ASP A A 143 143 . 55.824  55.171 54.971 1.00 42.35  1 . C  ?  
ATOM   1054 O    O    . ASP ASP ASP A A 143 143 . 56.758  54.852 54.236 1.00 43.00  1 . O  ?  
ATOM   1055 CB   CB   . ASP ASP ASP A A 143 143 . 56.010  57.564 54.134 1.00 35.93  1 . C  ?  
ATOM   1056 CG   CG   . ASP ASP ASP A A 143 143 . 55.683  57.106 52.735 1.00 39.39  1 . C  ?  
ATOM   1057 OD1  OD1  . ASP ASP ASP A A 143 143 . 54.814  56.218 52.585 1.00 42.50  1 . O  ?  
ATOM   1058 OD2  OD2  . ASP ASP ASP A A 143 143 . 56.288  57.646 51.775 1.00 39.46  1 . O  ?  
ATOM   1059 N    N    . VAL VAL VAL A A 144 144 . 55.083  54.272 55.630 1.00 46.80  1 . N  ?  
ATOM   1060 CA   CA   . VAL VAL VAL A A 144 144 . 55.504  52.872 55.706 1.00 36.42  1 . C  ?  
ATOM   1061 C    C    . VAL VAL VAL A A 144 144 . 55.732  52.308 54.314 1.00 39.68  1 . C  ?  
ATOM   1062 O    O    . VAL VAL VAL A A 144 144 . 56.761  51.673 54.043 1.00 37.53  1 . O  ?  
ATOM   1063 CB   CB   . VAL VAL VAL A A 144 144 . 54.479  52.046 56.500 1.00 42.40  1 . C  ?  
ATOM   1064 CG1  CG1  . VAL VAL VAL A A 144 144 . 54.695  50.551 56.246 1.00 45.97  1 . C  ?  
ATOM   1065 CG2  CG2  . VAL VAL VAL A A 144 144 . 54.640  52.321 57.973 1.00 45.05  1 . C  ?  
ATOM   1066 N    N    . LEU LEU LEU A A 145 145 . 54.789  52.543 53.398 1.00 38.13  1 . N  ?  
ATOM   1067 CA   CA   . LEU LEU LEU A A 145 145 . 54.937  52.004 52.051 1.00 38.25  1 . C  ?  
ATOM   1068 C    C    . LEU LEU LEU A A 145 145 . 56.160  52.589 51.351 1.00 43.76  1 . C  ?  
ATOM   1069 O    O    . LEU LEU LEU A A 145 145 . 56.950  51.859 50.741 1.00 41.62  1 . O  ?  
ATOM   1070 CB   CB   . LEU LEU LEU A A 145 145 . 53.667  52.247 51.244 1.00 36.43  1 . C  ?  
ATOM   1071 CG   CG   . LEU LEU LEU A A 145 145 . 52.463  51.434 51.759 1.00 41.01  1 . C  ?  
ATOM   1072 CD1  CD1  . LEU LEU LEU A A 145 145 . 51.231  51.685 50.932 1.00 33.01  1 . C  ?  
ATOM   1073 CD2  CD2  . LEU LEU LEU A A 145 145 . 52.776  49.970 51.748 1.00 36.93  1 . C  ?  
ATOM   1074 N    N    . GLY GLY GLY A A 146 146 . 56.334  53.908 51.422 1.00 43.08  1 . N  ?  
ATOM   1075 CA   CA   . GLY GLY GLY A A 146 146 . 57.559  54.493 50.898 1.00 40.50  1 . C  ?  
ATOM   1076 C    C    . GLY GLY GLY A A 146 146 . 58.795  53.832 51.464 1.00 38.15  1 . C  ?  
ATOM   1077 O    O    . GLY GLY GLY A A 146 146 . 59.714  53.474 50.729 1.00 40.09  1 . O  ?  
ATOM   1078 N    N    . LEU LEU LEU A A 147 147 . 58.841  53.667 52.787 1.00 36.76  1 . N  ?  
ATOM   1079 CA   CA   . LEU LEU LEU A A 147 147 . 59.970  53.005 53.417 1.00 34.54  1 . C  ?  
ATOM   1080 C    C    . LEU LEU LEU A A 147 147 . 60.165  51.596 52.870 1.00 40.60  1 . C  ?  
ATOM   1081 O    O    . LEU LEU LEU A A 147 147 . 61.291  51.192 52.552 1.00 37.61  1 . O  ?  
ATOM   1082 CB   CB   . LEU LEU LEU A A 147 147 . 59.761  52.971 54.923 1.00 36.84  1 . C  ?  
ATOM   1083 CG   CG   . LEU LEU LEU A A 147 147 . 59.864  54.294 55.682 1.00 43.56  1 . C  ?  
ATOM   1084 CD1  CD1  . LEU LEU LEU A A 147 147 . 59.758  53.986 57.163 1.00 40.85  1 . C  ?  
ATOM   1085 CD2  CD2  . LEU LEU LEU A A 147 147 . 61.192  55.019 55.370 1.00 35.21  1 . C  ?  
ATOM   1086 N    N    . LEU LEU LEU A A 148 148 . 59.078  50.825 52.758 1.00 39.33  1 . N  ?  
ATOM   1087 CA   CA   . LEU LEU LEU A A 148 148 . 59.197  49.456 52.262 1.00 37.11  1 . C  ?  
ATOM   1088 C    C    . LEU LEU LEU A A 148 148 . 59.874  49.427 50.896 1.00 38.31  1 . C  ?  
ATOM   1089 O    O    . LEU LEU LEU A A 148 148 . 60.784  48.620 50.655 1.00 38.50  1 . O  ?  
ATOM   1090 CB   CB   . LEU LEU LEU A A 148 148 . 57.816  48.793 52.190 1.00 34.18  1 . C  ?  
ATOM   1091 CG   CG   . LEU LEU LEU A A 148 148 . 57.810  47.340 51.732 1.00 27.43  1 . C  ?  
ATOM   1092 CD1  CD1  . LEU LEU LEU A A 148 148 . 58.927  46.615 52.437 1.00 30.63  1 . C  ?  
ATOM   1093 CD2  CD2  . LEU LEU LEU A A 148 148 . 56.503  46.708 52.102 1.00 30.95  1 . C  ?  
ATOM   1094 N    N    . ASN ASN ASN A A 149 149 . 59.432  50.298 49.983 1.00 36.34  1 . N  ?  
ATOM   1095 CA   CA   . ASN ASN ASN A A 149 149 . 59.968  50.303 48.627 1.00 36.18  1 . C  ?  
ATOM   1096 C    C    . ASN ASN ASN A A 149 149 . 61.385  50.848 48.570 1.00 36.38  1 . C  ?  
ATOM   1097 O    O    . ASN ASN ASN A A 149 149 . 62.184  50.396 47.745 1.00 35.45  1 . O  ?  
ATOM   1098 CB   CB   . ASN ASN ASN A A 149 149 . 59.060  51.097 47.707 1.00 37.39  1 . C  ?  
ATOM   1099 CG   CG   . ASN ASN ASN A A 149 149 . 57.917  50.269 47.191 1.00 40.79  1 . C  ?  
ATOM   1100 OD1  OD1  . ASN ASN ASN A A 149 149 . 58.039  49.602 46.171 1.00 47.48  1 . O  ?  
ATOM   1101 ND2  ND2  . ASN ASN ASN A A 149 149 . 56.807  50.284 47.905 1.00 41.63  1 . N  ?  
ATOM   1102 N    N    . LEU LEU LEU A A 150 150 . 61.718  51.819 49.417 1.00 39.24  1 . N  ?  
ATOM   1103 CA   CA   . LEU LEU LEU A A 150 150 . 63.109  52.248 49.498 1.00 39.29  1 . C  ?  
ATOM   1104 C    C    . LEU LEU LEU A A 150 150 . 63.974  51.091 49.969 1.00 39.81  1 . C  ?  
ATOM   1105 O    O    . LEU LEU LEU A A 150 150 . 65.096  50.889 49.480 1.00 41.31  1 . O  ?  
ATOM   1106 CB   CB   . LEU LEU LEU A A 150 150 . 63.238  53.462 50.429 1.00 35.18  1 . C  ?  
ATOM   1107 CG   CG   . LEU LEU LEU A A 150 150 . 64.612  54.115 50.640 1.00 44.18  1 . C  ?  
ATOM   1108 CD1  CD1  . LEU LEU LEU A A 150 150 . 65.155  54.754 49.359 1.00 39.68  1 . C  ?  
ATOM   1109 CD2  CD2  . LEU LEU LEU A A 150 150 . 64.562  55.145 51.767 1.00 43.10  1 . C  ?  
ATOM   1110 N    N    . TYR TYR TYR A A 151 151 . 63.445  50.286 50.891 1.00 40.32  1 . N  ?  
ATOM   1111 CA   CA   . TYR TYR TYR A A 151 151 . 64.230  49.186 51.429 1.00 39.17  1 . C  ?  
ATOM   1112 C    C    . TYR TYR TYR A A 151 151 . 64.536  48.154 50.346 1.00 39.65  1 . C  ?  
ATOM   1113 O    O    . TYR TYR TYR A A 151 151 . 65.679  47.700 50.218 1.00 38.88  1 . O  ?  
ATOM   1114 CB   CB   . TYR TYR TYR A A 151 151 . 63.509  48.565 52.621 1.00 35.78  1 . C  ?  
ATOM   1115 CG   CG   . TYR TYR TYR A A 151 151 . 64.086  47.238 53.029 1.00 37.81  1 . C  ?  
ATOM   1116 CD2  CD2  . TYR TYR TYR A A 151 151 . 65.067  47.158 54.000 1.00 31.23  1 . C  ?  
ATOM   1117 CD1  CD1  . TYR TYR TYR A A 151 151 . 63.633  46.059 52.439 1.00 33.43  1 . C  ?  
ATOM   1118 CE2  CE2  . TYR TYR TYR A A 151 151 . 65.586  45.940 54.366 1.00 40.37  1 . C  ?  
ATOM   1119 CE1  CE1  . TYR TYR TYR A A 151 151 . 64.142  44.832 52.802 1.00 34.41  1 . C  ?  
ATOM   1120 CZ   CZ   . TYR TYR TYR A A 151 151 . 65.113  44.768 53.765 1.00 38.38  1 . C  ?  
ATOM   1121 OH   OH   . TYR TYR TYR A A 151 151 . 65.635  43.544 54.108 1.00 33.88  1 . O  ?  
ATOM   1122 N    N    . GLU GLU GLU A A 152 152 . 63.537  47.785 49.537 1.00 37.08  1 . N  ?  
ATOM   1123 CA   CA   . GLU GLU GLU A A 152 152 . 63.814  46.835 48.460 1.00 36.38  1 . C  ?  
ATOM   1124 C    C    . GLU GLU GLU A A 152 152 . 64.781  47.433 47.445 1.00 39.14  1 . C  ?  
ATOM   1125 O    O    . GLU GLU GLU A A 152 152 . 65.722  46.761 46.999 1.00 37.47  1 . O  ?  
ATOM   1126 CB   CB   . GLU GLU GLU A A 152 152 . 62.520  46.394 47.769 1.00 36.16  1 . C  ?  
ATOM   1127 CG   CG   . GLU GLU GLU A A 152 152 . 61.498  45.652 48.676 1.00 36.39  1 . C  ?  
ATOM   1128 CD   CD   . GLU GLU GLU A A 152 152 . 61.947  44.260 49.140 1.00 42.71  1 . C  ?  
ATOM   1129 OE1  OE1  . GLU GLU GLU A A 152 152 . 63.074  43.806 48.800 1.00 38.85  1 . O  ?  
ATOM   1130 OE2  OE2  . GLU GLU GLU A A 152 152 . 61.150  43.609 49.859 1.00 44.15  1 . O  ?  
ATOM   1131 N    N    . ALA ALA ALA A A 153 153 . 64.578  48.706 47.087 1.00 36.48  1 . N  ?  
ATOM   1132 CA   CA   . ALA ALA ALA A A 153 153 . 65.428  49.355 46.095 1.00 37.95  1 . C  ?  
ATOM   1133 C    C    . ALA ALA ALA A A 153 153 . 66.872  49.459 46.564 1.00 37.19  1 . C  ?  
ATOM   1134 O    O    . ALA ALA ALA A A 153 153 . 67.790  49.456 45.739 1.00 36.89  1 . O  ?  
ATOM   1135 CB   CB   . ALA ALA ALA A A 153 153 . 64.887  50.752 45.760 1.00 39.21  1 . C  ?  
ATOM   1136 N    N    . SER SER SER A A 154 154 . 67.096  49.548 47.875 1.00 37.53  1 . N  ?  
ATOM   1137 CA   CA   . SER SER SER A A 154 154 . 68.451  49.737 48.371 1.00 37.07  1 . C  ?  
ATOM   1138 C    C    . SER SER SER A A 154 154 . 69.342  48.534 48.120 1.00 41.64  1 . C  ?  
ATOM   1139 O    O    . SER SER SER A A 154 154 . 70.565  48.639 48.311 1.00 43.89  1 . O  ?  
ATOM   1140 CB   CB   . SER SER SER A A 154 154 . 68.438  50.033 49.867 1.00 40.80  1 . C  ?  
ATOM   1141 OG   OG   . SER SER SER A A 154 154 . 68.319  48.823 50.596 1.00 36.15  1 . O  ?  
ATOM   1142 N    N    . HIS HIS HIS A A 155 155 . 68.775  47.404 47.707 1.00 34.83  1 . N  ?  
ATOM   1143 CA   CA   . HIS HIS HIS A A 155 155 . 69.567  46.217 47.440 1.00 33.01  1 . C  ?  
ATOM   1144 C    C    . HIS HIS HIS A A 155 155 . 69.994  46.097 45.978 1.00 33.92  1 . C  ?  
ATOM   1145 O    O    . HIS HIS HIS A A 155 155 . 70.642  45.115 45.618 1.00 33.68  1 . O  ?  
ATOM   1146 CB   CB   . HIS HIS HIS A A 155 155 . 68.788  44.963 47.878 1.00 36.46  1 . C  ?  
ATOM   1147 CG   CG   . HIS HIS HIS A A 155 155 . 68.561  44.888 49.356 1.00 37.78  1 . C  ?  
ATOM   1148 ND1  ND1  . HIS HIS HIS A A 155 155 . 69.488  44.347 50.224 1.00 36.94  1 . N  ?  
ATOM   1149 CD2  CD2  . HIS HIS HIS A A 155 155 . 67.521  45.307 50.121 1.00 33.64  1 . C  ?  
ATOM   1150 CE1  CE1  . HIS HIS HIS A A 155 155 . 69.032  44.449 51.463 1.00 38.78  1 . C  ?  
ATOM   1151 NE2  NE2  . HIS HIS HIS A A 155 155 . 67.842  45.029 51.427 1.00 37.25  1 . N  ?  
ATOM   1152 N    N    . VAL VAL VAL A A 156 156 . 69.654  47.044 45.114 1.00 34.58  1 . N  ?  
ATOM   1153 CA   CA   . VAL VAL VAL A A 156 156 . 70.099  46.951 43.732 1.00 35.43  1 . C  ?  
ATOM   1154 C    C    . VAL VAL VAL A A 156 156 . 71.136  48.027 43.407 1.00 39.44  1 . C  ?  
ATOM   1155 O    O    . VAL VAL VAL A A 156 156 . 71.328  48.368 42.239 1.00 39.45  1 . O  ?  
ATOM   1156 CB   CB   . VAL VAL VAL A A 156 156 . 68.915  46.998 42.749 1.00 34.77  1 . C  ?  
ATOM   1157 CG1  CG1  . VAL VAL VAL A A 156 156 . 67.749  46.124 43.247 1.00 32.52  1 . C  ?  
ATOM   1158 CG2  CG2  . VAL VAL VAL A A 156 156 . 68.476  48.441 42.504 1.00 40.31  1 . C  ?  
ATOM   1159 N    N    . ARG ARG ARG A A 157 157 . 71.825  48.556 44.418 1.00 39.26  1 . N  ?  
ATOM   1160 CA   CA   . ARG ARG ARG A A 157 157 . 72.826  49.584 44.171 1.00 35.46  1 . C  ?  
ATOM   1161 C    C    . ARG ARG ARG A A 157 157 . 73.986  49.041 43.347 1.00 39.41  1 . C  ?  
ATOM   1162 O    O    . ARG ARG ARG A A 157 157 . 74.368  47.868 43.455 1.00 39.31  1 . O  ?  
ATOM   1163 CB   CB   . ARG ARG ARG A A 157 157 . 73.375  50.127 45.483 1.00 38.62  1 . C  ?  
ATOM   1164 CG   CG   . ARG ARG ARG A A 157 157 . 72.384  50.877 46.327 1.00 46.90  1 . C  ?  
ATOM   1165 CD   CD   . ARG ARG ARG A A 157 157 . 72.975  51.100 47.704 1.00 49.74  1 . C  ?  
ATOM   1166 NE   NE   . ARG ARG ARG A A 157 157 . 74.264  51.774 47.623 1.00 45.40  1 . N  ?  
ATOM   1167 CZ   CZ   . ARG ARG ARG A A 157 157 . 75.153  51.795 48.608 1.00 51.16  1 . C  ?  
ATOM   1168 NH1  NH1  . ARG ARG ARG A A 157 157 . 74.887  51.165 49.748 1.00 45.19  1 . N  ?  
ATOM   1169 NH2  NH2  . ARG ARG ARG A A 157 157 . 76.315  52.426 48.442 1.00 50.89  1 . N  ?  
ATOM   1170 N    N    . THR THR THR A A 158 158 . 74.554  49.919 42.521 1.00 41.89  1 . N  ?  
ATOM   1171 CA   CA   . THR THR THR A A 158 158 . 75.870  49.756 41.919 1.00 37.69  1 . C  ?  
ATOM   1172 C    C    . THR THR THR A A 158 158 . 76.873  50.635 42.660 1.00 37.65  1 . C  ?  
ATOM   1173 O    O    . THR THR THR A A 158 158 . 76.542  51.293 43.650 1.00 44.47  1 . O  ?  
ATOM   1174 CB   CB   . THR THR THR A A 158 158 . 75.830  50.127 40.438 1.00 40.72  1 . C  ?  
ATOM   1175 OG1  OG1  . THR THR THR A A 158 158 . 75.730  51.557 40.310 1.00 41.83  1 . O  ?  
ATOM   1176 CG2  CG2  . THR THR THR A A 158 158 . 74.652  49.483 39.755 1.00 35.32  1 . C  ?  
ATOM   1177 N    N    . HIS HIS HIS A A 159 159 . 78.113  50.686 42.160 1.00 41.04  1 . N  ?  
ATOM   1178 CA   CA   . HIS HIS HIS A A 159 159 . 79.108  51.570 42.762 1.00 40.27  1 . C  ?  
ATOM   1179 C    C    . HIS HIS HIS A A 159 159 . 78.826  53.037 42.470 1.00 39.43  1 . C  ?  
ATOM   1180 O    O    . HIS HIS HIS A A 159 159 . 79.340  53.900 43.177 1.00 44.97  1 . O  ?  
ATOM   1181 CB   CB   . HIS HIS HIS A A 159 159 . 80.518  51.217 42.282 1.00 39.94  1 . C  ?  
ATOM   1182 CG   CG   . HIS HIS HIS A A 159 159 . 81.001  49.880 42.755 1.00 43.01  1 . C  ?  
ATOM   1183 ND1  ND1  . HIS HIS HIS A A 159 159 . 81.582  49.694 43.994 1.00 40.92  1 . N  ?  
ATOM   1184 CD2  CD2  . HIS HIS HIS A A 159 159 . 80.973  48.661 42.163 1.00 40.36  1 . C  ?  
ATOM   1185 CE1  CE1  . HIS HIS HIS A A 159 159 . 81.889  48.416 44.142 1.00 44.07  1 . C  ?  
ATOM   1186 NE2  NE2  . HIS HIS HIS A A 159 159 . 81.530  47.768 43.046 1.00 40.77  1 . N  ?  
ATOM   1187 N    N    . ALA ALA ALA A A 160 160 . 78.007  53.343 41.470 1.00 40.22  1 . N  ?  
ATOM   1188 CA   CA   . ALA ALA ALA A A 160 160 . 77.673  54.724 41.156 1.00 41.80  1 . C  ?  
ATOM   1189 C    C    . ALA ALA ALA A A 160 160 . 76.511  55.276 41.978 1.00 45.07  1 . C  ?  
ATOM   1190 O    O    . ALA ALA ALA A A 160 160 . 76.015  56.356 41.650 1.00 49.88  1 . O  ?  
ATOM   1191 CB   CB   . ALA ALA ALA A A 160 160 . 77.344  54.856 39.668 1.00 35.29  1 . C  ?  
ATOM   1192 N    N    . ASP ASP ASP A A 161 161 . 76.070  54.580 43.030 1.00 43.64  1 . N  ?  
ATOM   1193 CA   CA   . ASP ASP ASP A A 161 161 . 74.806  54.887 43.698 1.00 39.92  1 . C  ?  
ATOM   1194 C    C    . ASP ASP ASP A A 161 161 . 74.992  55.218 45.165 1.00 40.73  1 . C  ?  
ATOM   1195 O    O    . ASP ASP ASP A A 161 161 . 74.213  54.784 46.009 1.00 43.42  1 . O  ?  
ATOM   1196 CB   CB   . ASP ASP ASP A A 161 161 . 73.826  53.722 43.587 1.00 41.43  1 . C  ?  
ATOM   1197 CG   CG   . ASP ASP ASP A A 161 161 . 73.397  53.461 42.176 1.00 44.49  1 . C  ?  
ATOM   1198 OD1  OD1  . ASP ASP ASP A A 161 161 . 73.092  54.452 41.463 1.00 47.98  1 . O  ?  
ATOM   1199 OD2  OD2  . ASP ASP ASP A A 161 161 . 73.379  52.271 41.780 1.00 40.85  1 . O  ?  
ATOM   1200 N    N    . ASP ASP ASP A A 162 162 . 76.007  56.003 45.502 1.00 45.66  1 . N  ?  
ATOM   1201 CA   CA   . ASP ASP ASP A A 162 162 . 76.261  56.300 46.908 1.00 46.38  1 . C  ?  
ATOM   1202 C    C    . ASP ASP ASP A A 162 162 . 75.272  57.287 47.507 1.00 50.95  1 . C  ?  
ATOM   1203 O    O    . ASP ASP ASP A A 162 162 . 75.264  57.451 48.731 1.00 52.24  1 . O  ?  
ATOM   1204 CB   CB   . ASP ASP ASP A A 162 162 . 77.683  56.813 47.081 1.00 52.31  1 . C  ?  
ATOM   1205 CG   CG   . ASP ASP ASP A A 162 162 . 78.700  55.777 46.686 1.00 55.27  1 . C  ?  
ATOM   1206 OD1  OD1  . ASP ASP ASP A A 162 162 . 78.488  54.584 47.026 1.00 54.49  1 . O  ?  
ATOM   1207 OD2  OD2  . ASP ASP ASP A A 162 162 . 79.680  56.144 46.017 1.00 58.71  1 . O  ?  
ATOM   1208 N    N    . ILE ILE ILE A A 163 163 . 74.442  57.936 46.689 1.00 43.97  1 . N  ?  
ATOM   1209 CA   CA   . ILE ILE ILE A A 163 163 . 73.268  58.617 47.219 1.00 47.72  1 . C  ?  
ATOM   1210 C    C    . ILE ILE ILE A A 163 163 . 72.476  57.688 48.136 1.00 53.64  1 . C  ?  
ATOM   1211 O    O    . ILE ILE ILE A A 163 163 . 71.928  58.112 49.168 1.00 48.25  1 . O  ?  
ATOM   1212 CB   CB   . ILE ILE ILE A A 163 163 . 72.402  59.136 46.059 1.00 53.44  1 . C  ?  
ATOM   1213 CG1  CG1  . ILE ILE ILE A A 163 163 . 73.168  60.185 45.257 1.00 60.68  1 . C  ?  
ATOM   1214 CG2  CG2  . ILE ILE ILE A A 163 163 . 71.133  59.752 46.591 1.00 60.04  1 . C  ?  
ATOM   1215 CD1  CD1  . ILE ILE ILE A A 163 163 . 72.318  60.903 44.235 1.00 59.71  1 . C  ?  
ATOM   1216 N    N    . LEU LEU LEU A A 164 164 . 72.417  56.403 47.781 1.00 47.34  1 . N  ?  
ATOM   1217 CA   CA   . LEU LEU LEU A A 164 164 . 71.652  55.407 48.510 1.00 42.62  1 . C  ?  
ATOM   1218 C    C    . LEU LEU LEU A A 164 164 . 72.444  54.748 49.626 1.00 48.86  1 . C  ?  
ATOM   1219 O    O    . LEU LEU LEU A A 164 164 . 71.967  53.755 50.193 1.00 48.50  1 . O  ?  
ATOM   1220 CB   CB   . LEU LEU LEU A A 164 164 . 71.137  54.329 47.551 1.00 43.75  1 . C  ?  
ATOM   1221 CG   CG   . LEU LEU LEU A A 164 164 . 69.923  54.628 46.672 1.00 44.54  1 . C  ?  
ATOM   1222 CD1  CD1  . LEU LEU LEU A A 164 164 . 69.929  56.075 46.260 1.00 58.34  1 . C  ?  
ATOM   1223 CD2  CD2  . LEU LEU LEU A A 164 164 . 69.943  53.761 45.440 1.00 47.18  1 . C  ?  
ATOM   1224 N    N    . GLU GLU GLU A A 165 165 . 73.639  55.263 49.951 1.00 47.27  1 . N  ?  
ATOM   1225 CA   CA   . GLU GLU GLU A A 165 165 . 74.477  54.614 50.960 1.00 51.78  1 . C  ?  
ATOM   1226 C    C    . GLU GLU GLU A A 165 165 . 73.733  54.453 52.275 1.00 48.94  1 . C  ?  
ATOM   1227 O    O    . GLU GLU GLU A A 165 165 . 74.027  53.543 53.059 1.00 45.42  1 . O  ?  
ATOM   1228 CB   CB   . GLU GLU GLU A A 165 165 . 75.759  55.424 51.186 1.00 51.53  1 . C  ?  
ATOM   1229 CG   CG   . GLU GLU GLU A A 165 165 . 75.687  56.359 52.392 1.00 56.70  1 . C  ?  
ATOM   1230 CD   CD   . GLU GLU GLU A A 165 165 . 76.344  57.723 52.154 1.00 72.25  1 . C  ?  
ATOM   1231 OE1  OE1  . GLU GLU GLU A A 165 165 . 77.446  57.756 51.543 1.00 71.37  1 . O  ?  
ATOM   1232 OE2  OE2  . GLU GLU GLU A A 165 165 . 75.755  58.759 52.584 1.00 72.75  1 . O  ?  
ATOM   1233 N    N    . ASP ASP ASP A A 166 166 . 72.775  55.334 52.526 1.00 48.55  1 . N  ?  
ATOM   1234 CA   CA   . ASP ASP ASP A A 166 166 . 72.052  55.449 53.776 1.00 49.15  1 . C  ?  
ATOM   1235 C    C    . ASP ASP ASP A A 166 166 . 70.686  54.751 53.747 1.00 51.02  1 . C  ?  
ATOM   1236 O    O    . ASP ASP ASP A A 166 166 . 70.083  54.562 54.810 1.00 46.47  1 . O  ?  
ATOM   1237 CB   CB   . ASP ASP ASP A A 166 166 . 71.888  56.950 54.087 1.00 53.55  1 . C  ?  
ATOM   1238 CG   CG   . ASP ASP ASP A A 166 166 . 71.260  57.222 55.448 1.00 64.71  1 . C  ?  
ATOM   1239 OD1  OD1  . ASP ASP ASP A A 166 166 . 71.635  56.524 56.424 1.00 65.60  1 . O  ?  
ATOM   1240 OD2  OD2  . ASP ASP ASP A A 166 166 . 70.396  58.144 55.533 1.00 61.05  1 . O  ?  
ATOM   1241 N    N    . ALA ALA ALA A A 167 167 . 70.194  54.348 52.565 1.00 44.42  1 . N  ?  
ATOM   1242 CA   CA   . ALA ALA ALA A A 167 167 . 68.798  53.928 52.432 1.00 43.34  1 . C  ?  
ATOM   1243 C    C    . ALA ALA ALA A A 167 167 . 68.505  52.644 53.210 1.00 46.24  1 . C  ?  
ATOM   1244 O    O    . ALA ALA ALA A A 167 167 . 67.453  52.530 53.853 1.00 44.38  1 . O  ?  
ATOM   1245 CB   CB   . ALA ALA ALA A A 167 167 . 68.437  53.753 50.957 1.00 42.26  1 . C  ?  
ATOM   1246 N    N    . LEU LEU LEU A A 168 168 . 69.417  51.670 53.172 1.00 40.17  1 . N  ?  
ATOM   1247 CA   CA   . LEU LEU LEU A A 168 168 . 69.181  50.437 53.906 1.00 41.02  1 . C  ?  
ATOM   1248 C    C    . LEU LEU LEU A A 168 168 . 69.018  50.709 55.397 1.00 42.96  1 . C  ?  
ATOM   1249 O    O    . LEU LEU LEU A A 168 168 . 68.022  50.304 56.006 1.00 44.99  1 . O  ?  
ATOM   1250 CB   CB   . LEU LEU LEU A A 168 168 . 70.304  49.437 53.645 1.00 36.41  1 . C  ?  
ATOM   1251 CG   CG   . LEU LEU LEU A A 168 168 . 70.058  48.043 54.232 1.00 44.28  1 . C  ?  
ATOM   1252 CD1  CD1  . LEU LEU LEU A A 168 168 . 68.729  47.468 53.750 1.00 38.17  1 . C  ?  
ATOM   1253 CD2  CD2  . LEU LEU LEU A A 168 168 . 71.214  47.083 53.905 1.00 38.14  1 . C  ?  
ATOM   1254 N    N    . ALA ALA ALA A A 169 169 . 69.982  51.395 56.012 1.00 45.43  1 . N  ?  
ATOM   1255 CA   CA   . ALA ALA ALA A A 169 169 . 69.881  51.640 57.452 1.00 45.65  1 . C  ?  
ATOM   1256 C    C    . ALA ALA ALA A A 169 169 . 68.652  52.477 57.799 1.00 45.84  1 . C  ?  
ATOM   1257 O    O    . ALA ALA ALA A A 169 169 . 67.991  52.229 58.813 1.00 44.28  1 . O  ?  
ATOM   1258 CB   CB   . ALA ALA ALA A A 169 169 . 71.141  52.324 57.970 1.00 35.81  1 . C  ?  
ATOM   1259 N    N    . PHE PHE PHE A A 170 170 . 68.341  53.482 56.977 1.00 44.22  1 . N  ?  
ATOM   1260 CA   CA   . PHE PHE PHE A A 170 170 . 67.231  54.378 57.276 1.00 42.98  1 . C  ?  
ATOM   1261 C    C    . PHE PHE PHE A A 170 170 . 65.902  53.647 57.163 1.00 43.55  1 . C  ?  
ATOM   1262 O    O    . PHE PHE PHE A A 170 170 . 65.073  53.701 58.076 1.00 42.54  1 . O  ?  
ATOM   1263 CB   CB   . PHE PHE PHE A A 170 170 . 67.272  55.586 56.341 1.00 36.81  1 . C  ?  
ATOM   1264 CG   CG   . PHE PHE PHE A A 170 170 . 66.081  56.480 56.454 1.00 42.63  1 . C  ?  
ATOM   1265 CD1  CD1  . PHE PHE PHE A A 170 170 . 65.997  57.423 57.469 1.00 47.76  1 . C  ?  
ATOM   1266 CD2  CD2  . PHE PHE PHE A A 170 170 . 65.035  56.388 55.536 1.00 44.11  1 . C  ?  
ATOM   1267 CE1  CE1  . PHE PHE PHE A A 170 170 . 64.895  58.264 57.569 1.00 48.55  1 . C  ?  
ATOM   1268 CE2  CE2  . PHE PHE PHE A A 170 170 . 63.932  57.219 55.625 1.00 38.25  1 . C  ?  
ATOM   1269 CZ   CZ   . PHE PHE PHE A A 170 170 . 63.858  58.157 56.644 1.00 46.23  1 . C  ?  
ATOM   1270 N    N    . SER SER SER A A 171 171 . 65.688  52.946 56.053 1.00 42.56  1 . N  ?  
ATOM   1271 CA   CA   . SER SER SER A A 171 171 . 64.444  52.211 55.885 1.00 43.09  1 . C  ?  
ATOM   1272 C    C    . SER SER SER A A 171 171 . 64.312  51.101 56.924 1.00 40.65  1 . C  ?  
ATOM   1273 O    O    . SER SER SER A A 171 171 . 63.214  50.856 57.440 1.00 40.36  1 . O  ?  
ATOM   1274 CB   CB   . SER SER SER A A 171 171 . 64.361  51.652 54.468 1.00 38.18  1 . C  ?  
ATOM   1275 OG   OG   . SER SER SER A A 171 171 . 65.401  50.725 54.246 1.00 41.87  1 . O  ?  
ATOM   1276 N    N    . THR THR THR A A 172 172 . 65.418  50.445 57.272 1.00 39.21  1 . N  ?  
ATOM   1277 CA   CA   . THR THR THR A A 172 172 . 65.345  49.322 58.207 1.00 40.21  1 . C  ?  
ATOM   1278 C    C    . THR THR THR A A 172 172 . 64.907  49.784 59.590 1.00 43.26  1 . C  ?  
ATOM   1279 O    O    . THR THR THR A A 172 172 . 63.995  49.202 60.187 1.00 43.09  1 . O  ?  
ATOM   1280 CB   CB   . THR THR THR A A 172 172 . 66.695  48.602 58.282 1.00 40.29  1 . C  ?  
ATOM   1281 OG1  OG1  . THR THR THR A A 172 172 . 66.998  48.018 57.011 1.00 42.97  1 . O  ?  
ATOM   1282 CG2  CG2  . THR THR THR A A 172 172 . 66.663  47.508 59.331 1.00 36.91  1 . C  ?  
ATOM   1283 N    N    . ILE ILE ILE A A 173 173 . 65.553  50.829 60.120 1.00 44.60  1 . N  ?  
ATOM   1284 CA   CA   . ILE ILE ILE A A 173 173 . 65.237  51.311 61.465 1.00 44.56  1 . C  ?  
ATOM   1285 C    C    . ILE ILE ILE A A 173 173 . 63.763  51.659 61.579 1.00 46.57  1 . C  ?  
ATOM   1286 O    O    . ILE ILE ILE A A 173 173 . 63.122  51.407 62.606 1.00 45.46  1 . O  ?  
ATOM   1287 CB   CB   . ILE ILE ILE A A 173 173 . 66.106  52.530 61.813 1.00 50.40  1 . C  ?  
ATOM   1288 CG1  CG1  . ILE ILE ILE A A 173 173 . 67.564  52.112 62.009 1.00 58.93  1 . C  ?  
ATOM   1289 CG2  CG2  . ILE ILE ILE A A 173 173 . 65.595  53.198 63.059 1.00 48.59  1 . C  ?  
ATOM   1290 CD1  CD1  . ILE ILE ILE A A 173 173 . 68.528  53.291 61.972 1.00 65.35  1 . C  ?  
ATOM   1291 N    N    . HIS HIS HIS A A 174 174 . 63.206  52.268 60.545 1.00 39.90  1 . N  ?  
ATOM   1292 CA   CA   . HIS HIS HIS A A 174 174 . 61.852  52.746 60.667 1.00 40.75  1 . C  ?  
ATOM   1293 C    C    . HIS HIS HIS A A 174 174 . 60.822  51.694 60.288 1.00 45.51  1 . C  ?  
ATOM   1294 O    O    . HIS HIS HIS A A 174 174 . 59.684  51.775 60.762 1.00 41.59  1 . O  ?  
ATOM   1295 CB   CB   . HIS HIS HIS A A 174 174 . 61.687  54.023 59.842 1.00 44.31  1 . C  ?  
ATOM   1296 CG   CG   . HIS HIS HIS A A 174 174 . 62.490  55.169 60.373 1.00 49.39  1 . C  ?  
ATOM   1297 ND1  ND1  . HIS HIS HIS A A 174 174 . 62.493  55.517 61.709 1.00 50.12  1 . N  ?  
ATOM   1298 CD2  CD2  . HIS HIS HIS A A 174 174 . 63.340  56.028 59.760 1.00 45.38  1 . C  ?  
ATOM   1299 CE1  CE1  . HIS HIS HIS A A 174 174 . 63.301  56.545 61.891 1.00 48.55  1 . C  ?  
ATOM   1300 NE2  NE2  . HIS HIS HIS A A 174 174 . 63.825  56.876 60.725 1.00 47.64  1 . N  ?  
ATOM   1301 N    N    . LEU LEU LEU A A 175 175 . 61.189  50.702 59.465 1.00 37.76  1 . N  ?  
ATOM   1302 CA   CA   . LEU LEU LEU A A 175 175 . 60.279  49.588 59.263 1.00 38.66  1 . C  ?  
ATOM   1303 C    C    . LEU LEU LEU A A 175 175 . 60.164  48.769 60.537 1.00 41.60  1 . C  ?  
ATOM   1304 O    O    . LEU LEU LEU A A 175 175 . 59.059  48.362 60.928 1.00 42.08  1 . O  ?  
ATOM   1305 CB   CB   . LEU LEU LEU A A 175 175 . 60.725  48.726 58.086 1.00 36.34  1 . C  ?  
ATOM   1306 CG   CG   . LEU LEU LEU A A 175 175 . 60.555  49.391 56.720 1.00 35.91  1 . C  ?  
ATOM   1307 CD1  CD1  . LEU LEU LEU A A 175 175 . 61.361  48.640 55.696 1.00 33.58  1 . C  ?  
ATOM   1308 CD2  CD2  . LEU LEU LEU A A 175 175 . 59.099  49.471 56.280 1.00 33.59  1 . C  ?  
ATOM   1309 N    N    . GLU GLU GLU A A 176 176 . 61.285  48.565 61.228 1.00 41.00  1 . N  ?  
ATOM   1310 CA   CA   . GLU GLU GLU A A 176 176 . 61.229  47.858 62.500 1.00 44.47  1 . C  ?  
ATOM   1311 C    C    . GLU GLU GLU A A 176 176 . 60.360  48.606 63.502 1.00 42.99  1 . C  ?  
ATOM   1312 O    O    . GLU GLU GLU A A 176 176 . 59.591  47.996 64.253 1.00 46.36  1 . O  ?  
ATOM   1313 CB   CB   . GLU GLU GLU A A 176 176 . 62.635  47.655 63.054 1.00 38.43  1 . C  ?  
ATOM   1314 CG   CG   . GLU GLU GLU A A 176 176 . 63.441  46.599 62.338 1.00 44.17  1 . C  ?  
ATOM   1315 CD   CD   . GLU GLU GLU A A 176 176 . 64.934  46.671 62.688 1.00 58.05  1 . C  ?  
ATOM   1316 OE1  OE1  . GLU GLU GLU A A 176 176 . 65.419  47.759 63.095 1.00 57.69  1 . O  ?  
ATOM   1317 OE2  OE2  . GLU GLU GLU A A 176 176 . 65.626  45.637 62.561 1.00 63.30  1 . O  ?  
ATOM   1318 N    N    . SER SER SER A A 177 177 . 60.462  49.928 63.522 1.00 44.29  1 . N  ?  
ATOM   1319 CA   CA   . SER SER SER A A 177 177 . 59.690  50.699 64.481 1.00 44.76  1 . C  ?  
ATOM   1320 C    C    . SER SER SER A A 177 177 . 58.200  50.623 64.171 1.00 45.31  1 . C  ?  
ATOM   1321 O    O    . SER SER SER A A 177 177 . 57.375  50.543 65.087 1.00 44.82  1 . O  ?  
ATOM   1322 CB   CB   . SER SER SER A A 177 177 . 60.178  52.144 64.481 1.00 44.41  1 . C  ?  
ATOM   1323 OG   OG   . SER SER SER A A 177 177 . 59.889  52.784 65.708 1.00 52.48  1 . O  ?  
ATOM   1324 N    N    . ALA ALA ALA A A 178 178 . 57.840  50.627 62.882 1.00 40.08  1 . N  ?  
ATOM   1325 CA   CA   . ALA ALA ALA A A 178 178 . 56.441  50.663 62.475 1.00 40.20  1 . C  ?  
ATOM   1326 C    C    . ALA ALA ALA A A 178 178 . 55.777  49.288 62.499 1.00 46.56  1 . C  ?  
ATOM   1327 O    O    . ALA ALA ALA A A 178 178 . 54.573  49.202 62.776 1.00 40.19  1 . O  ?  
ATOM   1328 CB   CB   . ALA ALA ALA A A 178 178 . 56.314  51.255 61.072 1.00 34.97  1 . C  ?  
ATOM   1329 N    N    . ALA ALA ALA A A 179 179 . 56.539  48.221 62.222 1.00 41.60  1 . N  ?  
ATOM   1330 CA   CA   . ALA ALA ALA A A 179 179 . 55.946  46.927 61.885 1.00 45.90  1 . C  ?  
ATOM   1331 C    C    . ALA ALA ALA A A 179 179 . 54.892  46.431 62.865 1.00 41.27  1 . C  ?  
ATOM   1332 O    O    . ALA ALA ALA A A 179 179 . 53.863  45.905 62.409 1.00 39.88  1 . O  ?  
ATOM   1333 CB   CB   . ALA ALA ALA A A 179 179 . 57.057  45.866 61.757 1.00 41.09  1 . C  ?  
ATOM   1334 N    N    . PRO PRO PRO A A 180 180 . 55.087  46.497 64.186 1.00 44.29  1 . N  ?  
ATOM   1335 CA   CA   . PRO PRO PRO A A 180 180 . 54.166  45.805 65.100 1.00 37.93  1 . C  ?  
ATOM   1336 C    C    . PRO PRO PRO A A 180 180 . 52.748  46.348 65.087 1.00 41.33  1 . C  ?  
ATOM   1337 O    O    . PRO PRO PRO A A 180 180 . 51.844  45.659 65.567 1.00 46.68  1 . O  ?  
ATOM   1338 CB   CB   . PRO PRO PRO A A 180 180 . 54.819  46.005 66.474 1.00 40.96  1 . C  ?  
ATOM   1339 CG   CG   . PRO PRO PRO A A 180 180 . 56.264  46.333 66.172 1.00 38.06  1 . C  ?  
ATOM   1340 CD   CD   . PRO PRO PRO A A 180 180 . 56.257  47.070 64.882 1.00 37.34  1 . C  ?  
ATOM   1341 N    N    . HIS HIS HIS A A 181 181 . 52.511  47.541 64.558 1.00 40.11  1 . N  ?  
ATOM   1342 CA   CA   . HIS HIS HIS A A 181 181 . 51.183  48.141 64.561 1.00 39.56  1 . C  ?  
ATOM   1343 C    C    . HIS HIS HIS A A 181 181 . 50.581  48.201 63.173 1.00 41.76  1 . C  ?  
ATOM   1344 O    O    . HIS HIS HIS A A 181 181 . 49.518  48.802 62.987 1.00 47.56  1 . O  ?  
ATOM   1345 CB   CB   . HIS HIS HIS A A 181 181 . 51.250  49.533 65.182 1.00 42.24  1 . C  ?  
ATOM   1346 CG   CG   . HIS HIS HIS A A 181 181 . 51.978  49.552 66.488 1.00 46.06  1 . C  ?  
ATOM   1347 ND1  ND1  . HIS HIS HIS A A 181 181 . 51.516  48.879 67.604 1.00 42.87  1 . N  ?  
ATOM   1348 CD2  CD2  . HIS HIS HIS A A 181 181 . 53.160  50.113 66.845 1.00 44.56  1 . C  ?  
ATOM   1349 CE1  CE1  . HIS HIS HIS A A 181 181 . 52.375  49.041 68.595 1.00 48.71  1 . C  ?  
ATOM   1350 NE2  NE2  . HIS HIS HIS A A 181 181 . 53.381  49.788 68.163 1.00 46.99  1 . N  ?  
ATOM   1351 N    N    . LEU LEU LEU A A 182 182 . 51.224  47.584 62.195 1.00 41.78  1 . N  ?  
ATOM   1352 CA   CA   . LEU LEU LEU A A 182 182 . 50.694  47.594 60.845 1.00 43.10  1 . C  ?  
ATOM   1353 C    C    . LEU LEU LEU A A 182 182 . 49.594  46.551 60.711 1.00 44.10  1 . C  ?  
ATOM   1354 O    O    . LEU LEU LEU A A 182 182 . 49.587  45.528 61.402 1.00 41.50  1 . O  ?  
ATOM   1355 CB   CB   . LEU LEU LEU A A 182 182 . 51.806  47.332 59.827 1.00 40.49  1 . C  ?  
ATOM   1356 CG   CG   . LEU LEU LEU A A 182 182 . 52.951  48.345 59.806 1.00 39.16  1 . C  ?  
ATOM   1357 CD1  CD1  . LEU LEU LEU A A 182 182 . 54.008  47.860 58.824 1.00 40.55  1 . C  ?  
ATOM   1358 CD2  CD2  . LEU LEU LEU A A 182 182 . 52.448  49.722 59.435 1.00 38.01  1 . C  ?  
ATOM   1359 N    N    . LYS LYS LYS A A 183 183 . 48.652  46.836 59.822 1.00 43.82  1 . N  ?  
ATOM   1360 CA   CA   . LYS LYS LYS A A 183 183 . 47.557  45.929 59.550 1.00 44.36  1 . C  ?  
ATOM   1361 C    C    . LYS LYS LYS A A 183 183 . 48.070  44.747 58.742 1.00 43.56  1 . C  ?  
ATOM   1362 O    O    . LYS LYS LYS A A 183 183 . 49.166  44.790 58.181 1.00 45.11  1 . O  ?  
ATOM   1363 CB   CB   . LYS LYS LYS A A 183 183 . 46.453  46.652 58.782 1.00 42.03  1 . C  ?  
ATOM   1364 CG   CG   . LYS LYS LYS A A 183 183 . 46.869  46.973 57.374 1.00 41.94  1 . C  ?  
ATOM   1365 CD   CD   . LYS LYS LYS A A 183 183 . 45.870  47.824 56.675 1.00 48.61  1 . C  ?  
ATOM   1366 CE   CE   . LYS LYS LYS A A 183 183 . 46.448  48.342 55.367 1.00 57.50  1 . C  ?  
ATOM   1367 NZ   NZ   . LYS LYS LYS A A 183 183 . 45.369  48.990 54.534 1.00 71.01  1 . N  ?  
ATOM   1368 N    N    . SER SER SER A A 184 184 . 47.269  43.682 58.681 1.00 40.33  1 . N  ?  
ATOM   1369 CA   CA   . SER SER SER A A 184 184 . 47.669  42.512 57.895 1.00 43.88  1 . C  ?  
ATOM   1370 C    C    . SER SER SER A A 184 184 . 47.031  42.558 56.521 1.00 40.71  1 . C  ?  
ATOM   1371 O    O    . SER SER SER A A 184 184 . 45.934  43.060 56.385 1.00 50.34  1 . O  ?  
ATOM   1372 CB   CB   . SER SER SER A A 184 184 . 47.311  41.214 58.617 1.00 45.10  1 . C  ?  
ATOM   1373 OG   OG   . SER SER SER A A 184 184 . 48.217  40.971 59.685 1.00 46.91  1 . O  ?  
ATOM   1374 N    N    . PRO PRO PRO A A 185 185 . 47.726  42.052 55.491 1.00 41.52  1 . N  ?  
ATOM   1375 CA   CA   . PRO PRO PRO A A 185 185 . 49.022  41.365 55.583 1.00 41.91  1 . C  ?  
ATOM   1376 C    C    . PRO PRO PRO A A 185 185 . 50.266  42.252 55.458 1.00 42.21  1 . C  ?  
ATOM   1377 O    O    . PRO PRO PRO A A 185 185 . 51.386  41.714 55.485 1.00 41.70  1 . O  ?  
ATOM   1378 CB   CB   . PRO PRO PRO A A 185 185 . 48.961  40.388 54.411 1.00 39.32  1 . C  ?  
ATOM   1379 CG   CG   . PRO PRO PRO A A 185 185 . 48.190  41.166 53.375 1.00 45.21  1 . C  ?  
ATOM   1380 CD   CD   . PRO PRO PRO A A 185 185 . 47.182  42.004 54.122 1.00 38.48  1 . C  ?  
ATOM   1381 N    N    . LEU LEU LEU A A 186 186 . 50.095  43.573 55.329 1.00 42.86  1 . N  ?  
ATOM   1382 CA   CA   . LEU LEU LEU A A 186 186 . 51.261  44.446 55.212 1.00 38.01  1 . C  ?  
ATOM   1383 C    C    . LEU LEU LEU A A 186 186 . 52.288  44.148 56.300 1.00 40.56  1 . C  ?  
ATOM   1384 O    O    . LEU LEU LEU A A 186 186 . 53.497  44.128 56.035 1.00 38.73  1 . O  ?  
ATOM   1385 CB   CB   . LEU LEU LEU A A 186 186 . 50.843  45.914 55.261 1.00 38.29  1 . C  ?  
ATOM   1386 CG   CG   . LEU LEU LEU A A 186 186 . 51.984  46.936 55.223 1.00 38.86  1 . C  ?  
ATOM   1387 CD1  CD1  . LEU LEU LEU A A 186 186 . 52.838  46.743 53.981 1.00 37.65  1 . C  ?  
ATOM   1388 CD2  CD2  . LEU LEU LEU A A 186 186 . 51.412  48.352 55.262 1.00 38.98  1 . C  ?  
ATOM   1389 N    N    . ARG ARG ARG A A 187 187 . 51.832  43.896 57.530 1.00 39.17  1 . N  ?  
ATOM   1390 CA   CA   . ARG ARG ARG A A 187 187 . 52.785  43.641 58.605 1.00 37.72  1 . C  ?  
ATOM   1391 C    C    . ARG ARG ARG A A 187 187 . 53.682  42.464 58.259 1.00 43.50  1 . C  ?  
ATOM   1392 O    O    . ARG ARG ARG A A 187 187 . 54.911  42.526 58.423 1.00 42.66  1 . O  ?  
ATOM   1393 CB   CB   . ARG ARG ARG A A 187 187 . 52.063  43.381 59.931 1.00 42.60  1 . C  ?  
ATOM   1394 CG   CG   . ARG ARG ARG A A 187 187 . 53.057  43.110 61.065 1.00 42.11  1 . C  ?  
ATOM   1395 CD   CD   . ARG ARG ARG A A 187 187 . 52.419  43.043 62.422 1.00 41.68  1 . C  ?  
ATOM   1396 NE   NE   . ARG ARG ARG A A 187 187 . 51.589  41.863 62.575 1.00 56.76  1 . N  ?  
ATOM   1397 CZ   CZ   . ARG ARG ARG A A 187 187 . 50.567  41.768 63.426 1.00 69.21  1 . C  ?  
ATOM   1398 NH1  NH1  . ARG ARG ARG A A 187 187 . 49.864  40.635 63.504 1.00 63.88  1 . N  ?  
ATOM   1399 NH2  NH2  . ARG ARG ARG A A 187 187 . 50.243  42.808 64.194 1.00 63.42  1 . N  ?  
ATOM   1400 N    N    . GLU GLU GLU A A 188 188 . 53.076  41.370 57.782 1.00 43.11  1 . N  ?  
ATOM   1401 CA   CA   . GLU GLU GLU A A 188 188 . 53.844  40.175 57.470 1.00 38.70  1 . C  ?  
ATOM   1402 C    C    . GLU GLU GLU A A 188 188 . 54.744  40.401 56.264 1.00 39.04  1 . C  ?  
ATOM   1403 O    O    . GLU GLU GLU A A 188 188 . 55.820  39.791 56.168 1.00 35.53  1 . O  ?  
ATOM   1404 CB   CB   . GLU GLU GLU A A 188 188 . 52.898  38.990 57.243 1.00 32.70  1 . C  ?  
ATOM   1405 CG   CG   . GLU GLU GLU A A 188 188 . 52.214  38.475 58.546 1.00 41.94  1 . C  ?  
ATOM   1406 CD   CD   . GLU GLU GLU A A 188 188 . 51.220  39.484 59.171 1.00 53.70  1 . C  ?  
ATOM   1407 OE1  OE1  . GLU GLU GLU A A 188 188 . 50.327  39.979 58.441 1.00 47.06  1 . O  ?  
ATOM   1408 OE2  OE2  . GLU GLU GLU A A 188 188 . 51.338  39.796 60.390 1.00 56.73  1 . O  ?  
ATOM   1409 N    N    . GLN GLN GLN A A 189 189 . 54.319  41.258 55.335 1.00 34.05  1 . N  ?  
ATOM   1410 CA   CA   . GLN GLN GLN A A 189 189 . 55.176  41.577 54.207 1.00 36.38  1 . C  ?  
ATOM   1411 C    C    . GLN GLN GLN A A 189 189 . 56.419  42.329 54.670 1.00 37.95  1 . C  ?  
ATOM   1412 O    O    . GLN GLN GLN A A 189 189 . 57.538  41.995 54.268 1.00 39.04  1 . O  ?  
ATOM   1413 CB   CB   . GLN GLN GLN A A 189 189 . 54.414  42.388 53.164 1.00 36.27  1 . C  ?  
ATOM   1414 CG   CG   . GLN GLN GLN A A 189 189 . 55.254  42.680 51.940 1.00 38.27  1 . C  ?  
ATOM   1415 CD   CD   . GLN GLN GLN A A 189 189 . 54.455  43.223 50.788 1.00 41.53  1 . C  ?  
ATOM   1416 OE1  OE1  . GLN GLN GLN A A 189 189 . 53.612  44.107 50.959 1.00 47.38  1 . O  ?  
ATOM   1417 NE2  NE2  . GLN GLN GLN A A 189 189 . 54.704  42.693 49.599 1.00 39.19  1 . N  ?  
ATOM   1418 N    N    . VAL VAL VAL A A 190 190 . 56.252  43.305 55.560 1.00 33.75  1 . N  ?  
ATOM   1419 CA   CA   . VAL VAL VAL A A 190 190 . 57.399  44.059 56.058 1.00 38.74  1 . C  ?  
ATOM   1420 C    C    . VAL VAL VAL A A 190 190 . 58.319  43.161 56.881 1.00 39.37  1 . C  ?  
ATOM   1421 O    O    . VAL VAL VAL A A 190 190 . 59.547  43.195 56.735 1.00 36.80  1 . O  ?  
ATOM   1422 CB   CB   . VAL VAL VAL A A 190 190 . 56.921  45.282 56.865 1.00 42.67  1 . C  ?  
ATOM   1423 CG1  CG1  . VAL VAL VAL A A 190 190 . 58.100  46.044 57.439 1.00 33.54  1 . C  ?  
ATOM   1424 CG2  CG2  . VAL VAL VAL A A 190 190 . 56.030  46.195 55.986 1.00 33.72  1 . C  ?  
ATOM   1425 N    N    . THR THR THR A A 191 191 . 57.747  42.358 57.774 1.00 39.27  1 . N  ?  
ATOM   1426 CA   CA   . THR THR THR A A 191 191 . 58.573  41.465 58.583 1.00 38.78  1 . C  ?  
ATOM   1427 C    C    . THR THR THR A A 191 191 . 59.378  40.515 57.706 1.00 41.66  1 . C  ?  
ATOM   1428 O    O    . THR THR THR A A 191 191 . 60.549  40.224 57.993 1.00 41.53  1 . O  ?  
ATOM   1429 CB   CB   . THR THR THR A A 191 191 . 57.691  40.676 59.550 1.00 41.43  1 . C  ?  
ATOM   1430 OG1  OG1  . THR THR THR A A 191 191 . 57.078  41.600 60.456 1.00 55.13  1 . O  ?  
ATOM   1431 CG2  CG2  . THR THR THR A A 191 191 . 58.505  39.697 60.339 1.00 34.24  1 . C  ?  
ATOM   1432 N    N    . HIS HIS HIS A A 192 192 . 58.766  40.024 56.628 1.00 38.84  1 . N  ?  
ATOM   1433 CA   CA   . HIS HIS HIS A A 192 192 . 59.462  39.103 55.743 1.00 36.20  1 . C  ?  
ATOM   1434 C    C    . HIS HIS HIS A A 192 192 . 60.572  39.812 54.988 1.00 38.64  1 . C  ?  
ATOM   1435 O    O    . HIS HIS HIS A A 192 192 . 61.667  39.255 54.819 1.00 35.54  1 . O  ?  
ATOM   1436 CB   CB   . HIS HIS HIS A A 192 192 . 58.479  38.473 54.765 1.00 35.94  1 . C  ?  
ATOM   1437 CG   CG   . HIS HIS HIS A A 192 192 . 59.118  37.558 53.775 1.00 36.41  1 . C  ?  
ATOM   1438 ND1  ND1  . HIS HIS HIS A A 192 192 . 59.309  36.218 54.018 1.00 41.42  1 . N  ?  
ATOM   1439 CD2  CD2  . HIS HIS HIS A A 192 192 . 59.616  37.789 52.538 1.00 39.70  1 . C  ?  
ATOM   1440 CE1  CE1  . HIS HIS HIS A A 192 192 . 59.904  35.664 52.977 1.00 41.17  1 . C  ?  
ATOM   1441 NE2  NE2  . HIS HIS HIS A A 192 192 . 60.103  36.596 52.064 1.00 37.59  1 . N  ?  
ATOM   1442 N    N    . ALA ALA ALA A A 193 193 . 60.297  41.040 54.520 1.00 36.99  1 . N  ?  
ATOM   1443 CA   CA   . ALA ALA ALA A A 193 193 . 61.295  41.803 53.775 1.00 37.75  1 . C  ?  
ATOM   1444 C    C    . ALA ALA ALA A A 193 193 . 62.537  42.077 54.625 1.00 37.22  1 . C  ?  
ATOM   1445 O    O    . ALA ALA ALA A A 193 193 . 63.666  42.023 54.125 1.00 34.30  1 . O  ?  
ATOM   1446 CB   CB   . ALA ALA ALA A A 193 193 . 60.682  43.107 53.266 1.00 35.52  1 . C  ?  
ATOM   1447 N    N    . LEU LEU LEU A A 194 194 . 62.352  42.349 55.918 1.00 34.78  1 . N  ?  
ATOM   1448 CA   CA   . LEU LEU LEU A A 194 194 . 63.496  42.570 56.788 1.00 34.38  1 . C  ?  
ATOM   1449 C    C    . LEU LEU LEU A A 194 194 . 64.327  41.304 56.950 1.00 38.89  1 . C  ?  
ATOM   1450 O    O    . LEU LEU LEU A A 194 194 . 65.539  41.383 57.190 1.00 42.14  1 . O  ?  
ATOM   1451 CB   CB   . LEU LEU LEU A A 194 194 . 63.033  43.085 58.151 1.00 34.94  1 . C  ?  
ATOM   1452 CG   CG   . LEU LEU LEU A A 194 194 . 62.367  44.459 58.123 1.00 35.18  1 . C  ?  
ATOM   1453 CD1  CD1  . LEU LEU LEU A A 194 194 . 61.707  44.807 59.446 1.00 37.89  1 . C  ?  
ATOM   1454 CD2  CD2  . LEU LEU LEU A A 194 194 . 63.389  45.488 57.766 1.00 33.85  1 . C  ?  
ATOM   1455 N    N    . GLU GLU GLU A A 195 195 . 63.714  40.133 56.818 1.00 44.25  1 . N  ?  
ATOM   1456 CA   CA   . GLU GLU GLU A A 195 195 . 64.504  38.914 56.898 1.00 45.20  1 . C  ?  
ATOM   1457 C    C    . GLU GLU GLU A A 195 195 . 65.041  38.489 55.543 1.00 40.30  1 . C  ?  
ATOM   1458 O    O    . GLU GLU GLU A A 195 195 . 66.104  37.871 55.477 1.00 42.98  1 . O  ?  
ATOM   1459 CB   CB   . GLU GLU GLU A A 195 195 . 63.682  37.774 57.505 1.00 44.10  1 . C  ?  
ATOM   1460 CG   CG   . GLU GLU GLU A A 195 195 . 64.569  36.667 58.045 1.00 59.94  1 . C  ?  
ATOM   1461 CD   CD   . GLU GLU GLU A A 195 195 . 63.990  35.280 57.825 1.00 73.06  1 . C  ?  
ATOM   1462 OE1  OE1  . GLU GLU GLU A A 195 195 . 62.813  35.184 57.400 1.00 79.16  1 . O  ?  
ATOM   1463 OE2  OE2  . GLU GLU GLU A A 195 195 . 64.714  34.288 58.079 1.00 71.98  1 . O  ?  
ATOM   1464 N    N    . GLN GLN GLN A A 196 196 . 64.330  38.812 54.467 1.00 38.05  1 . N  ?  
ATOM   1465 CA   CA   . GLN GLN GLN A A 196 196 . 64.701  38.384 53.122 1.00 35.20  1 . C  ?  
ATOM   1466 C    C    . GLN GLN GLN A A 196 196 . 64.207  39.449 52.155 1.00 37.97  1 . C  ?  
ATOM   1467 O    O    . GLN GLN GLN A A 196 196 . 62.998  39.571 51.923 1.00 41.19  1 . O  ?  
ATOM   1468 CB   CB   . GLN GLN GLN A A 196 196 . 64.099  37.019 52.791 1.00 35.83  1 . C  ?  
ATOM   1469 CG   CG   . GLN GLN GLN A A 196 196 . 64.388  36.539 51.395 1.00 35.23  1 . C  ?  
ATOM   1470 CD   CD   . GLN GLN GLN A A 196 196 . 65.868  36.352 51.178 1.00 38.57  1 . C  ?  
ATOM   1471 OE1  OE1  . GLN GLN GLN A A 196 196 . 66.467  35.431 51.721 1.00 45.95  1 . O  ?  
ATOM   1472 NE2  NE2  . GLN GLN GLN A A 196 196 . 66.471  37.237 50.402 1.00 36.51  1 . N  ?  
ATOM   1473 N    N    . CYS CYS CYS A A 197 197 . 65.127  40.228 51.613 1.00 32.55  1 . N  ?  
ATOM   1474 CA   CA   . CYS CYS CYS A A 197 197 . 64.751  41.221 50.631 1.00 35.43  1 . C  ?  
ATOM   1475 C    C    . CYS CYS CYS A A 197 197 . 64.430  40.532 49.317 1.00 33.47  1 . C  ?  
ATOM   1476 O    O    . CYS CYS CYS A A 197 197 . 64.862  39.408 49.053 1.00 33.19  1 . O  ?  
ATOM   1477 CB   CB   . CYS CYS CYS A A 197 197 . 65.872  42.250 50.431 1.00 35.72  1 . C  ?  
ATOM   1478 SG   SG   . CYS CYS CYS A A 197 197 . 67.345  41.552 49.640 1.00 42.01  1 . S  ?  
ATOM   1479 N    N    . LEU LEU LEU A A 198 198 . 63.674  41.237 48.477 1.00 32.63  1 . N  ?  
ATOM   1480 CA   CA   . LEU LEU LEU A A 198 198 . 63.203  40.648 47.233 1.00 33.18  1 . C  ?  
ATOM   1481 C    C    . LEU LEU LEU A A 198 198 . 64.349  40.374 46.263 1.00 35.56  1 . C  ?  
ATOM   1482 O    O    . LEU LEU LEU A A 198 198 . 64.383  39.313 45.626 1.00 34.28  1 . O  ?  
ATOM   1483 CB   CB   . LEU LEU LEU A A 198 198 . 62.161  41.562 46.595 1.00 33.35  1 . C  ?  
ATOM   1484 CG   CG   . LEU LEU LEU A A 198 198 . 61.535  41.035 45.307 1.00 35.08  1 . C  ?  
ATOM   1485 CD1  CD1  . LEU LEU LEU A A 198 198 . 61.125  39.568 45.470 1.00 30.28  1 . C  ?  
ATOM   1486 CD2  CD2  . LEU LEU LEU A A 198 198 . 60.356  41.918 44.906 1.00 35.54  1 . C  ?  
ATOM   1487 N    N    . HIS HIS HIS A A 199 199 . 65.294  41.317 46.132 1.00 34.72  1 . N  ?  
ATOM   1488 CA   CA   . HIS HIS HIS A A 199 199 . 66.260  41.249 45.042 1.00 29.68  1 . C  ?  
ATOM   1489 C    C    . HIS HIS HIS A A 199 199 . 67.214  40.075 45.192 1.00 34.93  1 . C  ?  
ATOM   1490 O    O    . HIS HIS HIS A A 199 199 . 67.649  39.510 44.183 1.00 37.78  1 . O  ?  
ATOM   1491 CB   CB   . HIS HIS HIS A A 199 199 . 67.049  42.548 44.958 1.00 32.84  1 . C  ?  
ATOM   1492 CG   CG   . HIS HIS HIS A A 199 199 . 68.040  42.577 43.839 1.00 32.92  1 . C  ?  
ATOM   1493 ND1  ND1  . HIS HIS HIS A A 199 199 . 67.685  42.344 42.530 1.00 36.22  1 . N  ?  
ATOM   1494 CD2  CD2  . HIS HIS HIS A A 199 199 . 69.373  42.808 43.835 1.00 34.05  1 . C  ?  
ATOM   1495 CE1  CE1  . HIS HIS HIS A A 199 199 . 68.758  42.425 41.766 1.00 33.68  1 . C  ?  
ATOM   1496 NE2  NE2  . HIS HIS HIS A A 199 199 . 69.794  42.715 42.532 1.00 33.09  1 . N  ?  
ATOM   1497 N    N    . LYS LYS LYS A A 200 200 . 67.563  39.706 46.426 1.00 34.50  1 . N  ?  
ATOM   1498 CA   CA   . LYS LYS LYS A A 200 200 . 68.531  38.648 46.693 1.00 34.44  1 . C  ?  
ATOM   1499 C    C    . LYS LYS LYS A A 200 200 . 67.885  37.325 47.091 1.00 34.84  1 . C  ?  
ATOM   1500 O    O    . LYS LYS LYS A A 200 200 . 68.592  36.420 47.533 1.00 34.15  1 . O  ?  
ATOM   1501 CB   CB   . LYS LYS LYS A A 200 200 . 69.498  39.093 47.784 1.00 32.26  1 . C  ?  
ATOM   1502 CG   CG   . LYS LYS LYS A A 200 200 . 70.292  40.321 47.400 1.00 34.16  1 . C  ?  
ATOM   1503 CD   CD   . LYS LYS LYS A A 200 200 . 71.100  40.855 48.552 1.00 32.01  1 . C  ?  
ATOM   1504 CE   CE   . LYS LYS LYS A A 200 200 . 72.103  41.868 48.019 1.00 41.23  1 . C  ?  
ATOM   1505 NZ   NZ   . LYS LYS LYS A A 200 200 . 72.708  42.692 49.093 1.00 42.93  1 . N  ?  
ATOM   1506 N    N    . GLY GLY GLY A A 201 201 . 66.558  37.200 46.967 1.00 36.05  1 . N  ?  
ATOM   1507 CA   CA   . GLY GLY GLY A A 201 201 . 65.884  35.957 47.260 1.00 32.49  1 . C  ?  
ATOM   1508 C    C    . GLY GLY GLY A A 201 201 . 65.772  35.057 46.042 1.00 35.93  1 . C  ?  
ATOM   1509 O    O    . GLY GLY GLY A A 201 201 . 65.898  35.509 44.906 1.00 34.98  1 . O  ?  
ATOM   1510 N    N    . VAL VAL VAL A A 202 202 . 65.550  33.767 46.293 1.00 32.87  1 . N  ?  
ATOM   1511 CA   CA   . VAL VAL VAL A A 202 202 . 65.255  32.841 45.192 1.00 30.54  1 . C  ?  
ATOM   1512 C    C    . VAL VAL VAL A A 202 202 . 63.839  33.103 44.673 1.00 34.07  1 . C  ?  
ATOM   1513 O    O    . VAL VAL VAL A A 202 202 . 62.887  33.110 45.470 1.00 32.30  1 . O  ?  
ATOM   1514 CB   CB   . VAL VAL VAL A A 202 202 . 65.415  31.394 45.648 1.00 31.29  1 . C  ?  
ATOM   1515 CG1  CG1  . VAL VAL VAL A A 202 202 . 64.885  30.474 44.562 1.00 26.26  1 . C  ?  
ATOM   1516 CG2  CG2  . VAL VAL VAL A A 202 202 . 66.880  31.098 45.963 1.00 30.74  1 . C  ?  
ATOM   1517 N    N    . PRO PRO PRO A A 203 203 . 63.646  33.292 43.361 1.00 35.85  1 . N  ?  
ATOM   1518 CA   CA   . PRO PRO PRO A A 203 203 . 62.327  33.734 42.875 1.00 32.31  1 . C  ?  
ATOM   1519 C    C    . PRO PRO PRO A A 203 203 . 61.169  32.797 43.212 1.00 36.92  1 . C  ?  
ATOM   1520 O    O    . PRO PRO PRO A A 203 203 . 60.118  33.294 43.626 1.00 39.33  1 . O  ?  
ATOM   1521 CB   CB   . PRO PRO PRO A A 203 203 . 62.558  33.875 41.366 1.00 30.29  1 . C  ?  
ATOM   1522 CG   CG   . PRO PRO PRO A A 203 203 . 64.009  34.215 41.253 1.00 35.29  1 . C  ?  
ATOM   1523 CD   CD   . PRO PRO PRO A A 203 203 . 64.673  33.386 42.304 1.00 35.47  1 . C  ?  
ATOM   1524 N    N    . ARG ARG ARG A A 204 204 . 61.300  31.471 43.051 1.00 35.92  1 . N  ?  
ATOM   1525 CA   CA   . ARG ARG ARG A A 204 204 . 60.177  30.596 43.406 1.00 34.02  1 . C  ?  
ATOM   1526 C    C    . ARG ARG ARG A A 204 204 . 59.840  30.707 44.885 1.00 35.59  1 . C  ?  
ATOM   1527 O    O    . ARG ARG ARG A A 204 204 . 58.661  30.688 45.261 1.00 36.65  1 . O  ?  
ATOM   1528 CB   CB   . ARG ARG ARG A A 204 204 . 60.460  29.131 43.071 1.00 32.26  1 . C  ?  
ATOM   1529 CG   CG   . ARG ARG ARG A A 204 204 . 60.223  28.692 41.635 1.00 34.51  1 . C  ?  
ATOM   1530 CD   CD   . ARG ARG ARG A A 204 204 . 58.766  28.590 41.266 1.00 36.51  1 . C  ?  
ATOM   1531 NE   NE   . ARG ARG ARG A A 204 204 . 58.274  29.853 40.730 1.00 38.40  1 . N  ?  
ATOM   1532 CZ   CZ   . ARG ARG ARG A A 204 204 . 57.167  29.985 40.000 1.00 42.84  1 . C  ?  
ATOM   1533 NH1  NH1  . ARG ARG ARG A A 204 204 . 56.422  28.908 39.710 1.00 35.34  1 . N  ?  
ATOM   1534 NH2  NH2  . ARG ARG ARG A A 204 204 . 56.810  31.202 39.563 1.00 36.81  1 . N  ?  
ATOM   1535 N    N    . VAL VAL VAL A A 205 205 . 60.861  30.792 45.745 1.00 32.98  1 . N  ?  
ATOM   1536 CA   CA   . VAL VAL VAL A A 205 205 . 60.610  30.911 47.181 1.00 31.01  1 . C  ?  
ATOM   1537 C    C    . VAL VAL VAL A A 205 205 . 59.836  32.182 47.472 1.00 34.60  1 . C  ?  
ATOM   1538 O    O    . VAL VAL VAL A A 205 205 . 58.803  32.163 48.150 1.00 44.02  1 . O  ?  
ATOM   1539 CB   CB   . VAL VAL VAL A A 205 205 . 61.923  30.885 47.976 1.00 32.25  1 . C  ?  
ATOM   1540 CG1  CG1  . VAL VAL VAL A A 205 205 . 61.626  31.128 49.440 1.00 32.24  1 . C  ?  
ATOM   1541 CG2  CG2  . VAL VAL VAL A A 205 205 . 62.662  29.571 47.770 1.00 33.46  1 . C  ?  
ATOM   1542 N    N    . GLU GLU GLU A A 206 206 . 60.326  33.310 46.970 1.00 30.78  1 . N  ?  
ATOM   1543 CA   CA   . GLU GLU GLU A A 206 206 . 59.639  34.565 47.224 1.00 37.68  1 . C  ?  
ATOM   1544 C    C    . GLU GLU GLU A A 206 206 . 58.241  34.555 46.635 1.00 37.91  1 . C  ?  
ATOM   1545 O    O    . GLU GLU GLU A A 206 206 . 57.332  35.176 47.192 1.00 37.23  1 . O  ?  
ATOM   1546 CB   CB   . GLU GLU GLU A A 206 206 . 60.447  35.731 46.663 1.00 34.12  1 . C  ?  
ATOM   1547 CG   CG   . GLU GLU GLU A A 206 206 . 61.780  35.858 47.358 1.00 37.21  1 . C  ?  
ATOM   1548 CD   CD   . GLU GLU GLU A A 206 206 . 61.651  35.752 48.871 1.00 38.37  1 . C  ?  
ATOM   1549 OE1  OE1  . GLU GLU GLU A A 206 206 . 61.007  36.628 49.484 1.00 40.24  1 . O  ?  
ATOM   1550 OE2  OE2  . GLU GLU GLU A A 206 206 . 62.182  34.781 49.449 1.00 38.32  1 . O  ?  
ATOM   1551 N    N    . THR THR THR A A 207 207 . 58.056  33.854 45.516 1.00 32.61  1 . N  ?  
ATOM   1552 CA   CA   . THR THR THR A A 207 207 . 56.771  33.835 44.853 1.00 33.96  1 . C  ?  
ATOM   1553 C    C    . THR THR THR A A 207 207 . 55.764  32.993 45.626 1.00 39.53  1 . C  ?  
ATOM   1554 O    O    . THR THR THR A A 207 207 . 54.602  33.390 45.771 1.00 35.07  1 . O  ?  
ATOM   1555 CB   CB   . THR THR THR A A 207 207 . 56.932  33.310 43.436 1.00 36.15  1 . C  ?  
ATOM   1556 OG1  OG1  . THR THR THR A A 207 207 . 57.511  34.338 42.626 1.00 34.91  1 . O  ?  
ATOM   1557 CG2  CG2  . THR THR THR A A 207 207 . 55.550  32.882 42.874 1.00 35.38  1 . C  ?  
ATOM   1558 N    N    . ARG ARG ARG A A 208 208 . 56.194  31.830 46.128 1.00 34.91  1 . N  ?  
ATOM   1559 CA   CA   . ARG ARG ARG A A 208 208 . 55.319  31.024 46.965 1.00 36.83  1 . C  ?  
ATOM   1560 C    C    . ARG ARG ARG A A 208 208 . 54.865  31.800 48.190 1.00 40.03  1 . C  ?  
ATOM   1561 O    O    . ARG ARG ARG A A 208 208 . 53.688  31.728 48.583 1.00 36.69  1 . O  ?  
ATOM   1562 CB   CB   . ARG ARG ARG A A 208 208 . 56.028  29.746 47.395 1.00 40.33  1 . C  ?  
ATOM   1563 CG   CG   . ARG ARG ARG A A 208 208 . 55.224  28.900 48.343 1.00 38.31  1 . C  ?  
ATOM   1564 CD   CD   . ARG ARG ARG A A 208 208 . 54.100  28.285 47.600 1.00 41.50  1 . C  ?  
ATOM   1565 NE   NE   . ARG ARG ARG A A 208 208 . 53.802  26.908 48.019 1.00 49.21  1 . N  ?  
ATOM   1566 CZ   CZ   . ARG ARG ARG A A 208 208 . 52.897  26.581 48.942 1.00 47.34  1 . C  ?  
ATOM   1567 NH1  NH1  . ARG ARG ARG A A 208 208 . 52.679  25.310 49.222 1.00 45.34  1 . N  ?  
ATOM   1568 NH2  NH2  . ARG ARG ARG A A 208 208 . 52.214  27.527 49.587 1.00 46.19  1 . N  ?  
ATOM   1569 N    N    . PHE PHE PHE A A 209 209 . 55.791  32.525 48.829 1.00 36.40  1 . N  ?  
ATOM   1570 CA   CA   . PHE PHE PHE A A 209 209 . 55.410  33.306 50.000 1.00 34.12  1 . C  ?  
ATOM   1571 C    C    . PHE PHE PHE A A 209 209 . 54.455  34.427 49.623 1.00 35.64  1 . C  ?  
ATOM   1572 O    O    . PHE PHE PHE A A 209 209 . 53.500  34.708 50.355 1.00 37.91  1 . O  ?  
ATOM   1573 CB   CB   . PHE PHE PHE A A 209 209 . 56.641  33.883 50.702 1.00 34.61  1 . C  ?  
ATOM   1574 CG   CG   . PHE PHE PHE A A 209 209 . 56.309  34.871 51.797 1.00 34.36  1 . C  ?  
ATOM   1575 CD1  CD1  . PHE PHE PHE A A 209 209 . 55.962  34.440 53.064 1.00 37.74  1 . C  ?  
ATOM   1576 CD2  CD2  . PHE PHE PHE A A 209 209 . 56.345  36.231 51.564 1.00 36.66  1 . C  ?  
ATOM   1577 CE1  CE1  . PHE PHE PHE A A 209 209 . 55.651  35.355 54.075 1.00 36.70  1 . C  ?  
ATOM   1578 CE2  CE2  . PHE PHE PHE A A 209 209 . 56.032  37.148 52.580 1.00 33.89  1 . C  ?  
ATOM   1579 CZ   CZ   . PHE PHE PHE A A 209 209 . 55.689  36.704 53.830 1.00 28.58  1 . C  ?  
ATOM   1580 N    N    . PHE PHE PHE A A 210 210 . 54.701  35.102 48.501 1.00 36.38  1 . N  ?  
ATOM   1581 CA   CA   . PHE PHE PHE A A 210 210 . 53.860  36.250 48.179 1.00 38.09  1 . C  ?  
ATOM   1582 C    C    . PHE PHE PHE A A 210 210 . 52.431  35.806 47.881 1.00 35.66  1 . C  ?  
ATOM   1583 O    O    . PHE PHE PHE A A 210 210 . 51.478  36.334 48.460 1.00 36.05  1 . O  ?  
ATOM   1584 CB   CB   . PHE PHE PHE A A 210 210 . 54.438  37.043 47.008 1.00 30.91  1 . C  ?  
ATOM   1585 CG   CG   . PHE PHE PHE A A 210 210 . 53.665  38.290 46.700 1.00 30.45  1 . C  ?  
ATOM   1586 CD1  CD1  . PHE PHE PHE A A 210 210 . 53.747  39.390 47.533 1.00 33.79  1 . C  ?  
ATOM   1587 CD2  CD2  . PHE PHE PHE A A 210 210 . 52.849  38.359 45.588 1.00 33.02  1 . C  ?  
ATOM   1588 CE1  CE1  . PHE PHE PHE A A 210 210 . 53.025  40.551 47.254 1.00 36.12  1 . C  ?  
ATOM   1589 CE2  CE2  . PHE PHE PHE A A 210 210 . 52.123  39.510 45.304 1.00 36.54  1 . C  ?  
ATOM   1590 CZ   CZ   . PHE PHE PHE A A 210 210 . 52.199  40.602 46.139 1.00 29.99  1 . C  ?  
ATOM   1591 N    N    . ILE ILE ILE A A 211 211 . 52.271  34.819 46.991 1.00 33.28  1 . N  ?  
ATOM   1592 CA   CA   . ILE ILE ILE A A 211 211 . 50.947  34.305 46.660 1.00 35.73  1 . C  ?  
ATOM   1593 C    C    . ILE ILE ILE A A 211 211 . 50.189  33.926 47.923 1.00 36.43  1 . C  ?  
ATOM   1594 O    O    . ILE ILE ILE A A 211 211 . 49.078  34.405 48.162 1.00 39.74  1 . O  ?  
ATOM   1595 CB   CB   . ILE ILE ILE A A 211 211 . 51.052  33.110 45.698 1.00 38.52  1 . C  ?  
ATOM   1596 CG1  CG1  . ILE ILE ILE A A 211 211 . 51.823  33.504 44.436 1.00 35.71  1 . C  ?  
ATOM   1597 CG2  CG2  . ILE ILE ILE A A 211 211 . 49.655  32.634 45.336 1.00 36.34  1 . C  ?  
ATOM   1598 CD1  CD1  . ILE ILE ILE A A 211 211 . 51.700  32.496 43.315 1.00 31.89  1 . C  ?  
ATOM   1599 N    N    . SER SER SER A A 212 212 . 50.797  33.087 48.770 1.00 34.39  1 . N  ?  
ATOM   1600 CA   CA   . SER SER SER A A 212 212 . 50.053  32.447 49.859 1.00 37.36  1 . C  ?  
ATOM   1601 C    C    . SER SER SER A A 212 212 . 49.893  33.346 51.073 1.00 38.72  1 . C  ?  
ATOM   1602 O    O    . SER SER SER A A 212 212 . 48.806  33.420 51.650 1.00 40.25  1 . O  ?  
ATOM   1603 CB   CB   . SER SER SER A A 212 212 . 50.723  31.143 50.287 1.00 35.89  1 . C  ?  
ATOM   1604 OG   OG   . SER SER SER A A 212 212 . 50.599  30.193 49.251 1.00 49.98  1 . O  ?  
ATOM   1605 N    N    . SER SER SER A A 213 213 . 50.967  33.988 51.516 1.00 35.98  1 . N  ?  
ATOM   1606 CA   CA   . SER SER SER A A 213 213 . 50.901  34.731 52.762 1.00 35.25  1 . C  ?  
ATOM   1607 C    C    . SER SER SER A A 213 213 . 50.500  36.195 52.586 1.00 38.76  1 . C  ?  
ATOM   1608 O    O    . SER SER SER A A 213 213 . 50.046  36.813 53.553 1.00 36.22  1 . O  ?  
ATOM   1609 CB   CB   . SER SER SER A A 213 213 . 52.244  34.655 53.481 1.00 36.38  1 . C  ?  
ATOM   1610 OG   OG   . SER SER SER A A 213 213 . 52.668  33.308 53.598 1.00 39.27  1 . O  ?  
ATOM   1611 N    N    . ILE ILE ILE A A 214 214 . 50.645  36.770 51.392 1.00 34.86  1 . N  ?  
ATOM   1612 CA   CA   . ILE ILE ILE A A 214 214 . 50.422  38.204 51.250 1.00 33.74  1 . C  ?  
ATOM   1613 C    C    . ILE ILE ILE A A 214 214 . 49.245  38.471 50.325 1.00 37.01  1 . C  ?  
ATOM   1614 O    O    . ILE ILE ILE A A 214 214 . 48.197  38.943 50.772 1.00 37.62  1 . O  ?  
ATOM   1615 CB   CB   . ILE ILE ILE A A 214 214 . 51.686  38.935 50.752 1.00 33.35  1 . C  ?  
ATOM   1616 CG1  CG1  . ILE ILE ILE A A 214 214 . 52.883  38.632 51.661 1.00 32.38  1 . C  ?  
ATOM   1617 CG2  CG2  . ILE ILE ILE A A 214 214 . 51.448  40.424 50.708 1.00 33.30  1 . C  ?  
ATOM   1618 CD1  CD1  . ILE ILE ILE A A 214 214 . 52.654  39.015 53.101 1.00 33.21  1 . C  ?  
ATOM   1619 N    N    . TYR TYR TYR A A 215 215 . 49.407  38.177 49.032 1.00 35.86  1 . N  ?  
ATOM   1620 CA   CA   . TYR TYR TYR A A 215 215 . 48.409  38.591 48.053 1.00 39.16  1 . C  ?  
ATOM   1621 C    C    . TYR TYR TYR A A 215 215 . 47.070  37.905 48.303 1.00 41.35  1 . C  ?  
ATOM   1622 O    O    . TYR TYR TYR A A 215 215 . 46.011  38.543 48.258 1.00 39.20  1 . O  ?  
ATOM   1623 CB   CB   . TYR TYR TYR A A 215 215 . 48.914  38.301 46.644 1.00 31.25  1 . C  ?  
ATOM   1624 CG   CG   . TYR TYR TYR A A 215 215 . 48.260  39.182 45.609 1.00 36.77  1 . C  ?  
ATOM   1625 CD1  CD1  . TYR TYR TYR A A 215 215 . 48.358  40.566 45.687 1.00 36.54  1 . C  ?  
ATOM   1626 CD2  CD2  . TYR TYR TYR A A 215 215 . 47.552  38.638 44.549 1.00 38.58  1 . C  ?  
ATOM   1627 CE1  CE1  . TYR TYR TYR A A 215 215 . 47.779  41.377 44.737 1.00 33.86  1 . C  ?  
ATOM   1628 CE2  CE2  . TYR TYR TYR A A 215 215 . 46.959  39.442 43.596 1.00 35.61  1 . C  ?  
ATOM   1629 CZ   CZ   . TYR TYR TYR A A 215 215 . 47.071  40.813 43.696 1.00 36.10  1 . C  ?  
ATOM   1630 OH   OH   . TYR TYR TYR A A 215 215 . 46.486  41.621 42.740 1.00 36.23  1 . O  ?  
ATOM   1631 N    N    . ASP ASP ASP A A 216 216 . 47.097  36.603 48.573 1.00 43.58  1 . N  ?  
ATOM   1632 CA   CA   . ASP ASP ASP A A 216 216 . 45.863  35.889 48.849 1.00 42.38  1 . C  ?  
ATOM   1633 C    C    . ASP ASP ASP A A 216 216 . 45.062  36.573 49.943 1.00 44.00  1 . C  ?  
ATOM   1634 O    O    . ASP ASP ASP A A 216 216 . 43.838  36.450 49.981 1.00 46.73  1 . O  ?  
ATOM   1635 CB   CB   . ASP ASP ASP A A 216 216 . 46.178  34.454 49.253 1.00 43.69  1 . C  ?  
ATOM   1636 CG   CG   . ASP ASP ASP A A 216 216 . 44.936  33.597 49.343 1.00 48.10  1 . C  ?  
ATOM   1637 OD1  OD1  . ASP ASP ASP A A 216 216 . 44.143  33.608 48.375 1.00 44.93  1 . O  ?  
ATOM   1638 OD2  OD2  . ASP ASP ASP A A 216 216 . 44.756  32.926 50.380 1.00 51.94  1 . O  ?  
ATOM   1639 N    N    . LYS LYS LYS A A 217 217 . 45.734  37.301 50.833 1.00 45.18  1 . N  ?  
ATOM   1640 CA   CA   . LYS LYS LYS A A 217 217 . 45.126  37.897 52.016 1.00 39.86  1 . C  ?  
ATOM   1641 C    C    . LYS LYS LYS A A 217 217 . 44.968  39.403 51.894 1.00 40.25  1 . C  ?  
ATOM   1642 O    O    . LYS LYS LYS A A 217 217 . 44.694  40.076 52.893 1.00 43.05  1 . O  ?  
ATOM   1643 CB   CB   . LYS LYS LYS A A 217 217 . 45.957  37.554 53.253 1.00 39.93  1 . C  ?  
ATOM   1644 CG   CG   . LYS LYS LYS A A 217 217 . 45.965  36.058 53.590 1.00 40.34  1 . C  ?  
ATOM   1645 CD   CD   . LYS LYS LYS A A 217 217 . 46.839  35.849 54.787 1.00 49.59  1 . C  ?  
ATOM   1646 CE   CE   . LYS LYS LYS A A 217 217 . 46.499  34.603 55.568 1.00 56.05  1 . C  ?  
ATOM   1647 NZ   NZ   . LYS LYS LYS A A 217 217 . 47.524  34.467 56.671 1.00 63.68  1 . N  ?  
ATOM   1648 N    N    . GLU GLU GLU A A 218 218 . 45.136  39.942 50.696 1.00 41.82  1 . N  ?  
ATOM   1649 CA   CA   . GLU GLU GLU A A 218 218 . 44.977  41.365 50.454 1.00 45.68  1 . C  ?  
ATOM   1650 C    C    . GLU GLU GLU A A 218 218 . 43.518  41.720 50.206 1.00 49.33  1 . C  ?  
ATOM   1651 O    O    . GLU GLU GLU A A 218 218 . 42.893  41.183 49.290 1.00 54.28  1 . O  ?  
ATOM   1652 CB   CB   . GLU GLU GLU A A 218 218 . 45.798  41.761 49.236 1.00 48.60  1 . C  ?  
ATOM   1653 CG   CG   . GLU GLU GLU A A 218 218 . 47.259  41.806 49.485 1.00 48.90  1 . C  ?  
ATOM   1654 CD   CD   . GLU GLU GLU A A 218 218 . 47.653  43.135 50.055 1.00 55.25  1 . C  ?  
ATOM   1655 OE1  OE1  . GLU GLU GLU A A 218 218 . 46.714  43.918 50.351 1.00 57.47  1 . O  ?  
ATOM   1656 OE2  OE2  . GLU GLU GLU A A 218 218 . 48.882  43.392 50.183 1.00 53.87  1 . O  ?  
ATOM   1657 N    N    . GLN GLN GLN A A 219 219 . 42.987  42.661 50.986 1.00 59.06  1 . N  ?  
ATOM   1658 CA   CA   . GLN GLN GLN A A 219 219 . 41.640  43.161 50.715 1.00 62.63  1 . C  ?  
ATOM   1659 C    C    . GLN GLN GLN A A 219 219 . 41.499  43.636 49.268 1.00 59.81  1 . C  ?  
ATOM   1660 O    O    . GLN GLN GLN A A 219 219 . 40.474  43.391 48.618 1.00 56.25  1 . O  ?  
ATOM   1661 CB   CB   . GLN GLN GLN A A 219 219 . 41.299  44.290 51.693 1.00 61.34  1 . C  ?  
ATOM   1662 CG   CG   . GLN GLN GLN A A 219 219 . 40.068  45.110 51.309 1.00 70.56  1 . C  ?  
ATOM   1663 CD   CD   . GLN GLN GLN A A 219 219 . 38.774  44.294 51.355 1.00 85.45  1 . C  ?  
ATOM   1664 OE1  OE1  . GLN GLN GLN A A 219 219 . 38.740  43.193 51.917 1.00 88.83  1 . O  ?  
ATOM   1665 NE2  NE2  . GLN GLN GLN A A 219 219 . 37.701  44.836 50.762 1.00 80.93  1 . N  ?  
ATOM   1666 N    N    . SER SER SER A A 220 220 . 42.528  44.295 48.739 1.00 55.00  1 . N  ?  
ATOM   1667 CA   CA   . SER SER SER A A 220 220 . 42.470  44.919 47.423 1.00 50.91  1 . C  ?  
ATOM   1668 C    C    . SER SER SER A A 220 220 . 42.820  43.981 46.270 1.00 49.55  1 . C  ?  
ATOM   1669 O    O    . SER SER SER A A 220 220 . 42.770  44.410 45.113 1.00 50.16  1 . O  ?  
ATOM   1670 CB   CB   . SER SER SER A A 220 220 . 43.421  46.108 47.403 1.00 57.21  1 . C  ?  
ATOM   1671 OG   OG   . SER SER SER A A 220 220 . 44.682  45.712 47.946 1.00 67.27  1 . O  ?  
ATOM   1672 N    N    . LYS LYS LYS A A 221 221 . 43.170  42.726 46.546 1.00 44.21  1 . N  ?  
ATOM   1673 CA   CA   . LYS LYS LYS A A 221 221 . 43.769  41.867 45.534 1.00 46.00  1 . C  ?  
ATOM   1674 C    C    . LYS LYS LYS A A 221 221 . 42.931  41.839 44.264 1.00 43.57  1 . C  ?  
ATOM   1675 O    O    . LYS LYS LYS A A 221 221 . 41.706  41.956 44.302 1.00 50.41  1 . O  ?  
ATOM   1676 CB   CB   . LYS LYS LYS A A 221 221 . 43.927  40.443 46.074 1.00 45.36  1 . C  ?  
ATOM   1677 CG   CG   . LYS LYS LYS A A 221 221 . 42.616  39.868 46.601 1.00 47.13  1 . C  ?  
ATOM   1678 CD   CD   . LYS LYS LYS A A 221 221 . 42.601  38.366 46.534 1.00 49.83  1 . C  ?  
ATOM   1679 CE   CE   . LYS LYS LYS A A 221 221 . 41.282  37.808 47.016 1.00 52.01  1 . C  ?  
ATOM   1680 NZ   NZ   . LYS LYS LYS A A 221 221 . 41.195  37.941 48.504 1.00 61.92  1 . N  ?  
ATOM   1681 N    N    . ASN ASN ASN A A 222 222 . 43.598  41.656 43.128 1.00 38.94  1 . N  ?  
ATOM   1682 CA   CA   . ASN ASN ASN A A 222 222 . 42.907  41.420 41.873 1.00 37.92  1 . C  ?  
ATOM   1683 C    C    . ASN ASN ASN A A 222 222 . 42.672  39.921 41.710 1.00 46.86  1 . C  ?  
ATOM   1684 O    O    . ASN ASN ASN A A 222 222 . 43.612  39.116 41.778 1.00 45.10  1 . O  ?  
ATOM   1685 CB   CB   . ASN ASN ASN A A 222 222 . 43.692  41.979 40.690 1.00 35.05  1 . C  ?  
ATOM   1686 CG   CG   . ASN ASN ASN A A 222 222 . 43.028  41.678 39.364 1.00 43.03  1 . C  ?  
ATOM   1687 OD1  OD1  . ASN ASN ASN A A 222 222 . 42.999  40.526 38.937 1.00 47.97  1 . O  ?  
ATOM   1688 ND2  ND2  . ASN ASN ASN A A 222 222 . 42.480  42.701 38.708 1.00 38.47  1 . N  ?  
ATOM   1689 N    N    . ASN ASN ASN A A 223 223 . 41.412  39.549 41.487 1.00 43.08  1 . N  ?  
ATOM   1690 CA   CA   . ASN ASN ASN A A 223 223 . 41.059  38.137 41.513 1.00 43.53  1 . C  ?  
ATOM   1691 C    C    . ASN ASN ASN A A 223 223 . 41.573  37.420 40.282 1.00 42.06  1 . C  ?  
ATOM   1692 O    O    . ASN ASN ASN A A 223 223 . 42.010  36.270 40.366 1.00 39.91  1 . O  ?  
ATOM   1693 CB   CB   . ASN ASN ASN A A 223 223 . 39.543  37.981 41.639 1.00 42.37  1 . C  ?  
ATOM   1694 CG   CG   . ASN ASN ASN A A 223 223 . 39.052  38.402 42.989 1.00 46.00  1 . C  ?  
ATOM   1695 OD1  OD1  . ASN ASN ASN A A 223 223 . 39.219  37.657 43.965 1.00 42.79  1 . O  ?  
ATOM   1696 ND2  ND2  . ASN ASN ASN A A 223 223 . 38.495  39.628 43.080 1.00 40.21  1 . N  ?  
ATOM   1697 N    N    . VAL VAL VAL A A 224 224 . 41.489  38.069 39.125 1.00 44.20  1 . N  ?  
ATOM   1698 CA   CA   . VAL VAL VAL A A 224 224 . 42.082  37.504 37.921 1.00 40.32  1 . C  ?  
ATOM   1699 C    C    . VAL VAL VAL A A 224 224 . 43.548  37.166 38.170 1.00 42.49  1 . C  ?  
ATOM   1700 O    O    . VAL VAL VAL A A 224 224 . 44.003  36.050 37.881 1.00 42.38  1 . O  ?  
ATOM   1701 CB   CB   . VAL VAL VAL A A 224 224 . 41.907  38.476 36.743 1.00 42.27  1 . C  ?  
ATOM   1702 CG1  CG1  . VAL VAL VAL A A 224 224 . 42.602  37.955 35.510 1.00 42.82  1 . C  ?  
ATOM   1703 CG2  CG2  . VAL VAL VAL A A 224 224 . 40.420  38.726 36.488 1.00 45.10  1 . C  ?  
ATOM   1704 N    N    . LEU LEU LEU A A 225 225 . 44.306  38.108 38.749 1.00 38.63  1 . N  ?  
ATOM   1705 CA   CA   . LEU LEU LEU A A 225 225 . 45.742  37.879 38.905 1.00 43.19  1 . C  ?  
ATOM   1706 C    C    . LEU LEU LEU A A 225 225 . 46.016  36.780 39.924 1.00 41.76  1 . C  ?  
ATOM   1707 O    O    . LEU LEU LEU A A 225 225 . 46.937  35.977 39.739 1.00 39.03  1 . O  ?  
ATOM   1708 CB   CB   . LEU LEU LEU A A 225 225 . 46.469  39.172 39.310 1.00 39.48  1 . C  ?  
ATOM   1709 CG   CG   . LEU LEU LEU A A 225 225 . 46.531  40.321 38.305 1.00 41.19  1 . C  ?  
ATOM   1710 CD1  CD1  . LEU LEU LEU A A 225 225 . 47.167  41.566 38.932 1.00 39.71  1 . C  ?  
ATOM   1711 CD2  CD2  . LEU LEU LEU A A 225 225 . 47.279  39.908 37.059 1.00 34.88  1 . C  ?  
ATOM   1712 N    N    . LEU LEU LEU A A 226 226 . 45.230  36.729 41.008 1.00 43.51  1 . N  ?  
ATOM   1713 CA   CA   . LEU LEU LEU A A 226 226 . 45.471  35.724 42.041 1.00 41.59  1 . C  ?  
ATOM   1714 C    C    . LEU LEU LEU A A 226 226 . 45.198  34.320 41.513 1.00 44.03  1 . C  ?  
ATOM   1715 O    O    . LEU LEU LEU A A 226 226 . 46.005  33.402 41.713 1.00 43.42  1 . O  ?  
ATOM   1716 CB   CB   . LEU LEU LEU A A 226 226 . 44.619  36.009 43.279 1.00 38.63  1 . C  ?  
ATOM   1717 CG   CG   . LEU LEU LEU A A 226 226 . 44.819  35.000 44.419 1.00 39.60  1 . C  ?  
ATOM   1718 CD1  CD1  . LEU LEU LEU A A 226 226 . 46.235  35.095 44.953 1.00 39.89  1 . C  ?  
ATOM   1719 CD2  CD2  . LEU LEU LEU A A 226 226 . 43.818  35.226 45.536 1.00 38.34  1 . C  ?  
ATOM   1720 N    N    . ARG ARG ARG A A 227 227 . 44.062  34.127 40.831 1.00 42.85  1 . N  ?  
ATOM   1721 CA   CA   . ARG ARG ARG A A 227 227 . 43.769  32.806 40.286 1.00 41.98  1 . C  ?  
ATOM   1722 C    C    . ARG ARG ARG A A 227 227 . 44.841  32.399 39.293 1.00 37.36  1 . C  ?  
ATOM   1723 O    O    . ARG ARG ARG A A 227 227 . 45.319  31.260 39.313 1.00 39.21  1 . O  ?  
ATOM   1724 CB   CB   . ARG ARG ARG A A 227 227 . 42.384  32.774 39.625 1.00 39.03  1 . C  ?  
ATOM   1725 CG   CG   . ARG ARG ARG A A 227 227 . 42.062  31.406 39.051 1.00 40.17  1 . C  ?  
ATOM   1726 CD   CD   . ARG ARG ARG A A 227 227 . 40.570  31.058 39.074 1.00 50.15  1 . C  ?  
ATOM   1727 NE   NE   . ARG ARG ARG A A 227 227 . 40.334  29.688 38.609 1.00 41.73  1 . N  ?  
ATOM   1728 CZ   CZ   . ARG ARG ARG A A 227 227 . 40.301  28.631 39.415 1.00 47.41  1 . C  ?  
ATOM   1729 NH1  NH1  . ARG ARG ARG A A 227 227 . 40.479  28.794 40.721 1.00 49.43  1 . N  ?  
ATOM   1730 NH2  NH2  . ARG ARG ARG A A 227 227 . 40.102  27.412 38.925 1.00 38.05  1 . N  ?  
ATOM   1731 N    N    . PHE PHE PHE A A 228 228 . 45.229  33.326 38.415 1.00 39.86  1 . N  ?  
ATOM   1732 CA   CA   . PHE PHE PHE A A 228 228 . 46.327  33.090 37.485 1.00 42.59  1 . C  ?  
ATOM   1733 C    C    . PHE PHE PHE A A 228 228 . 47.565  32.581 38.223 1.00 43.54  1 . C  ?  
ATOM   1734 O    O    . PHE PHE PHE A A 228 228 . 48.132  31.535 37.878 1.00 40.83  1 . O  ?  
ATOM   1735 CB   CB   . PHE PHE PHE A A 228 228 . 46.621  34.386 36.725 1.00 40.67  1 . C  ?  
ATOM   1736 CG   CG   . PHE PHE PHE A A 228 228 . 47.564  34.232 35.564 1.00 41.10  1 . C  ?  
ATOM   1737 CD1  CD1  . PHE PHE PHE A A 228 228 . 48.150  33.016 35.270 1.00 45.19  1 . C  ?  
ATOM   1738 CD2  CD2  . PHE PHE PHE A A 228 228 . 47.880  35.330 34.773 1.00 44.36  1 . C  ?  
ATOM   1739 CE1  CE1  . PHE PHE PHE A A 228 228 . 49.046  32.889 34.208 1.00 47.09  1 . C  ?  
ATOM   1740 CE2  CE2  . PHE PHE PHE A A 228 228 . 48.757  35.212 33.707 1.00 47.73  1 . C  ?  
ATOM   1741 CZ   CZ   . PHE PHE PHE A A 228 228 . 49.344  33.991 33.428 1.00 45.66  1 . C  ?  
ATOM   1742 N    N    . ALA ALA ALA A A 229 229 . 47.980  33.295 39.268 1.00 42.16  1 . N  ?  
ATOM   1743 CA   CA   . ALA ALA ALA A A 229 229 . 49.219  32.931 39.947 1.00 42.20  1 . C  ?  
ATOM   1744 C    C    . ALA ALA ALA A A 229 229 . 49.100  31.567 40.614 1.00 41.64  1 . C  ?  
ATOM   1745 O    O    . ALA ALA ALA A A 229 229 . 50.021  30.745 40.531 1.00 39.94  1 . O  ?  
ATOM   1746 CB   CB   . ALA ALA ALA A A 229 229 . 49.592  34.003 40.968 1.00 39.25  1 . C  ?  
ATOM   1747 N    N    . LYS LYS LYS A A 230 230 . 47.975  31.308 41.284 1.00 41.60  1 . N  ?  
ATOM   1748 CA   CA   . LYS LYS LYS A A 230 230 . 47.800  30.021 41.947 1.00 40.00  1 . C  ?  
ATOM   1749 C    C    . LYS LYS LYS A A 230 230 . 47.846  28.881 40.936 1.00 38.96  1 . C  ?  
ATOM   1750 O    O    . LYS LYS LYS A A 230 230 . 48.600  27.916 41.112 1.00 40.08  1 . O  ?  
ATOM   1751 CB   CB   . LYS LYS LYS A A 230 230 . 46.489  30.009 42.732 1.00 41.36  1 . C  ?  
ATOM   1752 CG   CG   . LYS LYS LYS A A 230 230 . 46.478  30.911 43.944 1.00 36.61  1 . C  ?  
ATOM   1753 CD   CD   . LYS LYS LYS A A 230 230 . 45.388  30.525 44.929 1.00 41.11  1 . C  ?  
ATOM   1754 CE   CE   . LYS LYS LYS A A 230 230 . 45.291  31.530 46.077 1.00 44.23  1 . C  ?  
ATOM   1755 NZ   NZ   . LYS LYS LYS A A 230 230 . 44.242  31.204 47.081 1.00 45.90  1 . N  ?  
ATOM   1756 N    N    . LEU LEU LEU A A 231 231 . 47.056  28.986 39.856 1.00 39.75  1 . N  ?  
ATOM   1757 CA   CA   . LEU LEU LEU A A 231 231 . 47.041  27.933 38.840 1.00 42.00  1 . C  ?  
ATOM   1758 C    C    . LEU LEU LEU A A 231 231 . 48.422  27.740 38.221 1.00 44.18  1 . C  ?  
ATOM   1759 O    O    . LEU LEU LEU A A 231 231 . 48.891  26.602 38.071 1.00 41.82  1 . O  ?  
ATOM   1760 CB   CB   . LEU LEU LEU A A 231 231 . 46.003  28.242 37.759 1.00 41.24  1 . C  ?  
ATOM   1761 CG   CG   . LEU LEU LEU A A 231 231 . 44.538  28.149 38.218 1.00 43.18  1 . C  ?  
ATOM   1762 CD1  CD1  . LEU LEU LEU A A 231 231 . 43.576  28.536 37.106 1.00 35.74  1 . C  ?  
ATOM   1763 CD2  CD2  . LEU LEU LEU A A 231 231 . 44.238  26.753 38.727 1.00 40.50  1 . C  ?  
ATOM   1764 N    N    . ASP ASP ASP A A 232 232 . 49.096  28.845 37.862 1.00 42.17  1 . N  ?  
ATOM   1765 CA   CA   . ASP ASP ASP A A 232 232 . 50.399  28.734 37.213 1.00 38.91  1 . C  ?  
ATOM   1766 C    C    . ASP ASP ASP A A 232 232 . 51.437  28.129 38.149 1.00 38.94  1 . C  ?  
ATOM   1767 O    O    . ASP ASP ASP A A 232 232 . 52.197  27.247 37.740 1.00 41.34  1 . O  ?  
ATOM   1768 CB   CB   . ASP ASP ASP A A 232 232 . 50.868  30.094 36.698 1.00 41.76  1 . C  ?  
ATOM   1769 CG   CG   . ASP ASP ASP A A 232 232 . 51.938  29.969 35.607 1.00 40.54  1 . C  ?  
ATOM   1770 OD2  OD2  . ASP ASP ASP A A 232 232 . 51.576  29.942 34.412 1.00 40.81  1 . O  ?  
ATOM   1771 OD1  OD1  . ASP ASP ASP A A 232 232 . 53.144  29.906 35.942 1.00 41.59  1 . O  ?  
ATOM   1772 N    N    . PHE PHE PHE A A 233 233 . 51.480  28.565 39.411 1.00 36.99  1 . N  ?  
ATOM   1773 CA   CA   . PHE PHE PHE A A 233 233 . 52.412  27.947 40.349 1.00 36.49  1 . C  ?  
ATOM   1774 C    C    . PHE PHE PHE A A 233 233 . 52.153  26.448 40.483 1.00 43.17  1 . C  ?  
ATOM   1775 O    O    . PHE PHE PHE A A 233 233 . 53.091  25.639 40.449 1.00 41.70  1 . O  ?  
ATOM   1776 CB   CB   . PHE PHE PHE A A 233 233 . 52.337  28.611 41.720 1.00 35.77  1 . C  ?  
ATOM   1777 CG   CG   . PHE PHE PHE A A 233 233 . 53.417  28.140 42.671 1.00 41.31  1 . C  ?  
ATOM   1778 CD2  CD2  . PHE PHE PHE A A 233 233 . 54.607  28.849 42.802 1.00 38.06  1 . C  ?  
ATOM   1779 CD1  CD1  . PHE PHE PHE A A 233 233 . 53.255  26.976 43.415 1.00 39.60  1 . C  ?  
ATOM   1780 CE2  CE2  . PHE PHE PHE A A 233 233 . 55.612  28.415 43.671 1.00 37.39  1 . C  ?  
ATOM   1781 CE1  CE1  . PHE PHE PHE A A 233 233 . 54.254  26.538 44.286 1.00 42.08  1 . C  ?  
ATOM   1782 CZ   CZ   . PHE PHE PHE A A 233 233 . 55.440  27.261 44.410 1.00 40.75  1 . C  ?  
ATOM   1783 N    N    . ASN ASN ASN A A 234 234 . 50.884  26.053 40.666 1.00 40.30  1 . N  ?  
ATOM   1784 CA   CA   . ASN ASN ASN A A 234 234 . 50.606  24.626 40.823 1.00 40.96  1 . C  ?  
ATOM   1785 C    C    . ASN ASN ASN A A 234 234 . 50.884  23.860 39.540 1.00 37.72  1 . C  ?  
ATOM   1786 O    O    . ASN ASN ASN A A 234 234 . 51.295  22.696 39.591 1.00 36.63  1 . O  ?  
ATOM   1787 CB   CB   . ASN ASN ASN A A 234 234 . 49.161  24.399 41.276 1.00 41.45  1 . C  ?  
ATOM   1788 CG   CG   . ASN ASN ASN A A 234 234 . 48.927  24.843 42.703 1.00 43.99  1 . C  ?  
ATOM   1789 OD1  OD1  . ASN ASN ASN A A 234 234 . 49.874  24.972 43.492 1.00 44.63  1 . O  ?  
ATOM   1790 ND2  ND2  . ASN ASN ASN A A 234 234 . 47.667  25.083 43.047 1.00 44.95  1 . N  ?  
ATOM   1791 N    N    . LEU LEU LEU A A 235 235 . 50.675  24.483 38.382 1.00 38.93  1 . N  ?  
ATOM   1792 CA   CA   . LEU LEU LEU A A 235 235 . 50.902  23.757 37.140 1.00 39.79  1 . C  ?  
ATOM   1793 C    C    . LEU LEU LEU A A 235 235 . 52.385  23.513 36.910 1.00 42.79  1 . C  ?  
ATOM   1794 O    O    . LEU LEU LEU A A 235 235 . 52.786  22.402 36.547 1.00 45.87  1 . O  ?  
ATOM   1795 CB   CB   . LEU LEU LEU A A 235 235 . 50.296  24.512 35.969 1.00 41.09  1 . C  ?  
ATOM   1796 CG   CG   . LEU LEU LEU A A 235 235 . 50.515  23.804 34.635 1.00 46.97  1 . C  ?  
ATOM   1797 CD1  CD1  . LEU LEU LEU A A 235 235 . 50.056  22.369 34.743 1.00 43.66  1 . C  ?  
ATOM   1798 CD2  CD2  . LEU LEU LEU A A 235 235 . 49.739  24.530 33.548 1.00 49.33  1 . C  ?  
ATOM   1799 N    N    . LEU LEU LEU A A 236 236 . 53.219  24.537 37.130 1.00 42.15  1 . N  ?  
ATOM   1800 CA   CA   . LEU LEU LEU A A 236 236 . 54.660  24.347 37.016 1.00 41.78  1 . C  ?  
ATOM   1801 C    C    . LEU LEU LEU A A 236 236 . 55.163  23.359 38.057 1.00 42.94  1 . C  ?  
ATOM   1802 O    O    . LEU LEU LEU A A 236 236 . 56.033  22.529 37.766 1.00 44.40  1 . O  ?  
ATOM   1803 CB   CB   . LEU LEU LEU A A 236 236 . 55.385  25.687 37.145 1.00 42.86  1 . C  ?  
ATOM   1804 CG   CG   . LEU LEU LEU A A 236 236 . 55.341  26.512 35.861 1.00 44.51  1 . C  ?  
ATOM   1805 CD1  CD1  . LEU LEU LEU A A 236 236 . 55.997  27.878 36.033 1.00 43.57  1 . C  ?  
ATOM   1806 CD2  CD2  . LEU LEU LEU A A 236 236 . 56.055  25.718 34.790 1.00 50.00  1 . C  ?  
ATOM   1807 N    N    . GLN GLN GLN A A 237 237 . 54.614  23.418 39.271 1.00 39.72  1 . N  ?  
ATOM   1808 CA   CA   . GLN GLN GLN A A 237 237 . 55.042  22.484 40.304 1.00 42.51  1 . C  ?  
ATOM   1809 C    C    . GLN GLN GLN A A 237 237 . 54.928  21.037 39.830 1.00 44.99  1 . C  ?  
ATOM   1810 O    O    . GLN GLN GLN A A 237 237 . 55.761  20.195 40.188 1.00 47.78  1 . O  ?  
ATOM   1811 CB   CB   . GLN GLN GLN A A 237 237 . 54.227  22.710 41.577 1.00 41.98  1 . C  ?  
ATOM   1812 CG   CG   . GLN GLN GLN A A 237 237 . 54.649  21.842 42.755 1.00 39.97  1 . C  ?  
ATOM   1813 CD   CD   . GLN GLN GLN A A 237 237 . 53.678  21.961 43.912 1.00 43.75  1 . C  ?  
ATOM   1814 OE1  OE1  . GLN GLN GLN A A 237 237 . 52.507  21.581 43.792 1.00 49.87  1 . O  ?  
ATOM   1815 NE2  NE2  . GLN GLN GLN A A 237 237 . 54.146  22.498 45.034 1.00 40.85  1 . N  ?  
ATOM   1816 N    N    . MET MET MET A A 238 238 . 53.904  20.728 39.016 1.00 46.75  1 . N  ?  
ATOM   1817 CA   CA   . MET MET MET A A 238 238 . 53.747  19.364 38.510 1.00 46.19  1 . C  ?  
ATOM   1818 C    C    . MET MET MET A A 238 238 . 54.920  18.985 37.619 1.00 47.40  1 . C  ?  
ATOM   1819 O    O    . MET MET MET A A 238 238 . 55.416  17.852 37.681 1.00 47.56  1 . O  ?  
ATOM   1820 CB   CB   . MET MET MET A A 238 238 . 52.431  19.207 37.740 1.00 42.85  1 . C  ?  
ATOM   1821 CG   CG   . MET MET MET A A 238 238 . 51.168  19.323 38.562 1.00 40.74  1 . C  ?  
ATOM   1822 SD   SD   . MET MET MET A A 238 238 . 49.694  19.435 37.494 1.00 50.40  1 . S  ?  
ATOM   1823 CE   CE   . MET MET MET A A 238 238 . 48.454  20.063 38.625 1.00 39.53  1 . C  ?  
ATOM   1824 N    N    . LEU LEU LEU A A 239 239 . 55.388  19.929 36.792 1.00 47.87  1 . N  ?  
ATOM   1825 CA   CA   . LEU LEU LEU A A 239 239 . 56.576  19.685 35.980 1.00 45.69  1 . C  ?  
ATOM   1826 C    C    . LEU LEU LEU A A 239 239 . 57.797  19.453 36.859 1.00 45.56  1 . C  ?  
ATOM   1827 O    O    . LEU LEU LEU A A 239 239 . 58.558  18.501 36.652 1.00 46.59  1 . O  ?  
ATOM   1828 CB   CB   . LEU LEU LEU A A 239 239 . 56.820  20.848 35.024 1.00 44.06  1 . C  ?  
ATOM   1829 CG   CG   . LEU LEU LEU A A 239 239 . 58.082  20.672 34.172 1.00 45.43  1 . C  ?  
ATOM   1830 CD1  CD1  . LEU LEU LEU A A 239 239 . 57.888  19.578 33.153 1.00 43.14  1 . C  ?  
ATOM   1831 CD2  CD2  . LEU LEU LEU A A 239 239 . 58.456  21.952 33.479 1.00 44.74  1 . C  ?  
ATOM   1832 N    N    . HIS HIS HIS A A 240 240 . 57.999  20.306 37.858 1.00 44.29  1 . N  ?  
ATOM   1833 CA   CA   . HIS HIS HIS A A 240 240 . 59.157  20.112 38.720 1.00 47.40  1 . C  ?  
ATOM   1834 C    C    . HIS HIS HIS A A 240 240 . 59.071  18.775 39.420 1.00 46.12  1 . C  ?  
ATOM   1835 O    O    . HIS HIS HIS A A 240 240 . 60.096  18.124 39.656 1.00 47.09  1 . O  ?  
ATOM   1836 CB   CB   . HIS HIS HIS A A 240 240 . 59.275  21.234 39.754 1.00 45.15  1 . C  ?  
ATOM   1837 CG   CG   . HIS HIS HIS A A 240 240 . 59.197  22.605 39.171 1.00 40.16  1 . C  ?  
ATOM   1838 ND1  ND1  . HIS HIS HIS A A 240 240 . 58.661  23.673 39.859 1.00 41.23  1 . N  ?  
ATOM   1839 CD2  CD2  . HIS HIS HIS A A 240 240 . 59.574  23.084 37.966 1.00 40.98  1 . C  ?  
ATOM   1840 CE1  CE1  . HIS HIS HIS A A 240 240 . 58.717  24.753 39.104 1.00 39.00  1 . C  ?  
ATOM   1841 NE2  NE2  . HIS HIS HIS A A 240 240 . 59.263  24.423 37.949 1.00 40.43  1 . N  ?  
ATOM   1842 N    N    . LYS LYS LYS A A 241 241 . 57.851  18.346 39.759 1.00 47.55  1 . N  ?  
ATOM   1843 CA   CA   . LYS LYS LYS A A 241 241 . 57.696  17.061 40.431 1.00 45.93  1 . C  ?  
ATOM   1844 C    C    . LYS LYS LYS A A 241 241 . 58.073  15.906 39.507 1.00 45.74  1 . C  ?  
ATOM   1845 O    O    . LYS LYS LYS A A 241 241 . 58.715  14.945 39.944 1.00 44.86  1 . O  ?  
ATOM   1846 CB   CB   . LYS LYS LYS A A 241 241 . 56.274  16.923 40.975 1.00 49.70  1 . C  ?  
ATOM   1847 CG   CG   . LYS LYS LYS A A 241 241 . 56.158  17.350 42.446 1.00 47.68  1 . C  ?  
ATOM   1848 CD   CD   . LYS LYS LYS A A 241 241 . 54.790  17.905 42.781 1.00 41.13  1 . C  ?  
ATOM   1849 CE   CE   . LYS LYS LYS A A 241 241 . 53.749  16.831 43.053 1.00 43.16  1 . C  ?  
ATOM   1850 NZ   NZ   . LYS LYS LYS A A 241 241 . 52.401  17.475 43.163 1.00 48.00  1 . N  ?  
ATOM   1851 N    N    . GLN GLN GLN A A 242 242 . 57.720  15.996 38.221 1.00 47.44  1 . N  ?  
ATOM   1852 CA   CA   . GLN GLN GLN A A 242 242 . 58.183  15.004 37.251 1.00 41.54  1 . C  ?  
ATOM   1853 C    C    . GLN GLN GLN A A 242 242 . 59.699  14.983 37.178 1.00 48.80  1 . C  ?  
ATOM   1854 O    O    . GLN GLN GLN A A 242 242 . 60.335  13.930 37.333 1.00 50.43  1 . O  ?  
ATOM   1855 CB   CB   . GLN GLN GLN A A 242 242 . 57.597  15.297 35.870 1.00 45.00  1 . C  ?  
ATOM   1856 CG   CG   . GLN GLN GLN A A 242 242 . 56.104  15.072 35.791 1.00 55.04  1 . C  ?  
ATOM   1857 CD   CD   . GLN GLN GLN A A 242 242 . 55.533  15.319 34.405 1.00 67.03  1 . C  ?  
ATOM   1858 OE1  OE1  . GLN GLN GLN A A 242 242 . 54.396  14.918 34.107 1.00 67.99  1 . O  ?  
ATOM   1859 NE2  NE2  . GLN GLN GLN A A 242 242 . 56.316  15.984 33.548 1.00 61.36  1 . N  ?  
ATOM   1860 N    N    . GLU GLU GLU A A 243 243 . 60.296  16.147 36.928 1.00 51.16  1 . N  ?  
ATOM   1861 CA   CA   . GLU GLU GLU A A 243 243 . 61.743  16.241 36.855 1.00 45.18  1 . C  ?  
ATOM   1862 C    C    . GLU GLU GLU A A 243 243 . 62.401  15.611 38.070 1.00 47.37  1 . C  ?  
ATOM   1863 O    O    . GLU GLU GLU A A 243 243 . 63.338  14.817 37.937 1.00 49.34  1 . O  ?  
ATOM   1864 CB   CB   . GLU GLU GLU A A 243 243 . 62.139  17.704 36.711 1.00 46.48  1 . C  ?  
ATOM   1865 CG   CG   . GLU GLU GLU A A 243 243 . 61.673  18.293 35.412 1.00 42.58  1 . C  ?  
ATOM   1866 CD   CD   . GLU GLU GLU A A 243 243 . 61.796  19.793 35.393 1.00 46.64  1 . C  ?  
ATOM   1867 OE1  OE1  . GLU GLU GLU A A 243 243 . 62.215  20.373 36.425 1.00 43.91  1 . O  ?  
ATOM   1868 OE2  OE2  . GLU GLU GLU A A 243 243 . 61.473  20.385 34.342 1.00 45.41  1 . O  ?  
ATOM   1869 N    N    . LEU LEU LEU A A 244 244 . 61.928  15.959 39.271 1.00 46.17  1 . N  ?  
ATOM   1870 CA   CA   . LEU LEU LEU A A 244 244 . 62.547  15.416 40.480 1.00 48.12  1 . C  ?  
ATOM   1871 C    C    . LEU LEU LEU A A 244 244 . 62.351  13.900 40.570 1.00 49.28  1 . C  ?  
ATOM   1872 O    O    . LEU LEU LEU A A 244 244 . 63.246  13.172 41.025 1.00 44.84  1 . O  ?  
ATOM   1873 CB   CB   . LEU LEU LEU A A 244 244 . 61.984  16.125 41.716 1.00 43.64  1 . C  ?  
ATOM   1874 CG   CG   . LEU LEU LEU A A 244 244 . 62.542  15.671 43.069 1.00 41.94  1 . C  ?  
ATOM   1875 CD1  CD1  . LEU LEU LEU A A 244 244 . 64.055  15.542 43.044 1.00 35.25  1 . C  ?  
ATOM   1876 CD2  CD2  . LEU LEU LEU A A 244 244 . 62.099  16.581 44.194 1.00 41.43  1 . C  ?  
ATOM   1877 N    N    . ALA ALA ALA A A 245 245 . 61.189  13.404 40.137 1.00 47.78  1 . N  ?  
ATOM   1878 CA   CA   . ALA ALA ALA A A 245 245 . 60.995  11.959 40.069 1.00 51.36  1 . C  ?  
ATOM   1879 C    C    . ALA ALA ALA A A 245 245 . 62.057  11.313 39.190 1.00 52.74  1 . C  ?  
ATOM   1880 O    O    . ALA ALA ALA A A 245 245 . 62.757  10.390 39.615 1.00 53.88  1 . O  ?  
ATOM   1881 CB   CB   . ALA ALA ALA A A 245 245 . 59.598  11.637 39.542 1.00 48.82  1 . C  ?  
ATOM   1882 N    N    . GLN GLN GLN A A 246 246 . 62.196  11.803 37.959 1.00 50.49  1 . N  ?  
ATOM   1883 CA   CA   . GLN GLN GLN A A 246 246 . 63.137  11.215 37.016 1.00 51.08  1 . C  ?  
ATOM   1884 C    C    . GLN GLN GLN A A 246 246 . 64.576  11.333 37.526 1.00 54.44  1 . C  ?  
ATOM   1885 O    O    . GLN GLN GLN A A 246 246 . 65.343  10.362 37.497 1.00 51.74  1 . O  ?  
ATOM   1886 CB   CB   . GLN GLN GLN A A 246 246 . 62.945  11.885 35.655 1.00 48.22  1 . C  ?  
ATOM   1887 CG   CG   . GLN GLN GLN A A 246 246 . 64.171  11.935 34.768 1.00 66.81  1 . C  ?  
ATOM   1888 CD   CD   . GLN GLN GLN A A 246 246 . 63.960  12.868 33.580 1.00 70.90  1 . C  ?  
ATOM   1889 OE1  OE1  . GLN GLN GLN A A 246 246 . 62.817  13.214 33.259 1.00 69.90  1 . O  ?  
ATOM   1890 NE2  NE2  . GLN GLN GLN A A 246 246 . 65.060  13.291 32.930 1.00 60.81  1 . N  ?  
ATOM   1891 N    N    . VAL VAL VAL A A 247 247 . 64.951  12.515 38.016 1.00 51.60  1 . N  ?  
ATOM   1892 CA   CA   . VAL VAL VAL A A 247 247 . 66.255  12.707 38.650 1.00 52.82  1 . C  ?  
ATOM   1893 C    C    . VAL VAL VAL A A 247 247 . 66.405  11.796 39.863 1.00 52.33  1 . C  ?  
ATOM   1894 O    O    . VAL VAL VAL A A 247 247 . 67.507  11.310 40.159 1.00 48.65  1 . O  ?  
ATOM   1895 CB   CB   . VAL VAL VAL A A 247 247 . 66.425  14.200 39.024 1.00 51.06  1 . C  ?  
ATOM   1896 CG1  CG1  . VAL VAL VAL A A 247 247 . 67.376  14.377 40.188 1.00 40.03  1 . C  ?  
ATOM   1897 CG2  CG2  . VAL VAL VAL A A 247 247 . 66.854  15.012 37.809 1.00 47.46  1 . C  ?  
ATOM   1898 N    N    . SER SER SER A A 248 248 . 65.306  11.552 40.586 1.00 53.20  1 . N  ?  
ATOM   1899 CA   CA   . SER SER SER A A 248 248 . 65.360  10.673 41.753 1.00 55.72  1 . C  ?  
ATOM   1900 C    C    . SER SER SER A A 248 248 . 65.563  9.215  41.349 1.00 55.31  1 . C  ?  
ATOM   1901 O    O    . SER SER SER A A 248 248 . 66.184  8.450  42.094 1.00 47.97  1 . O  ?  
ATOM   1902 CB   CB   . SER SER SER A A 248 248 . 64.085  10.832 42.594 1.00 48.51  1 . C  ?  
ATOM   1903 OG   OG   . SER SER SER A A 248 248 . 64.253  11.794 43.633 1.00 44.80  1 . O  ?  
ATOM   1904 N    N    . ARG ARG ARG A A 249 249 . 65.039  8.820  40.181 1.00 57.93  1 . N  ?  
ATOM   1905 CA   CA   . ARG ARG ARG A A 249 249 . 65.298  7.489  39.637 1.00 57.44  1 . C  ?  
ATOM   1906 C    C    . ARG ARG ARG A A 249 249 . 66.758  7.358  39.222 1.00 61.58  1 . C  ?  
ATOM   1907 O    O    . ARG ARG ARG A A 249 249 . 67.432  6.378  39.571 1.00 60.17  1 . O  ?  
ATOM   1908 CB   CB   . ARG ARG ARG A A 249 249 . 64.373  7.221  38.442 1.00 58.35  1 . C  ?  
ATOM   1909 CG   CG   . ARG ARG ARG A A 249 249 . 63.361  6.090  38.620 1.00 65.56  1 . C  ?  
ATOM   1910 CD   CD   . ARG ARG ARG A A 249 249 . 61.900  6.591  38.555 1.00 73.03  1 . C  ?  
ATOM   1911 NE   NE   . ARG ARG ARG A A 249 249 . 61.632  7.483  37.417 1.00 73.79  1 . N  ?  
ATOM   1912 CZ   CZ   . ARG ARG ARG A A 249 249 . 60.577  8.298  37.323 1.00 72.44  1 . C  ?  
ATOM   1913 NH1  NH1  . ARG ARG ARG A A 249 249 . 59.670  8.351  38.301 1.00 63.73  1 . N  ?  
ATOM   1914 NH2  NH2  . ARG ARG ARG A A 249 249 . 60.425  9.072  36.247 1.00 68.71  1 . N  ?  
ATOM   1915 N    N    . TRP TRP TRP A A 250 250 . 67.264  8.355  38.483 1.00 60.12  1 . N  ?  
ATOM   1916 CA   CA   . TRP TRP TRP A A 250 250 . 68.666  8.384  38.068 1.00 56.16  1 . C  ?  
ATOM   1917 C    C    . TRP TRP TRP A A 250 250 . 69.605  8.233  39.263 1.00 55.83  1 . C  ?  
ATOM   1918 O    O    . TRP TRP TRP A A 250 250 . 70.504  7.384  39.265 1.00 59.90  1 . O  ?  
ATOM   1919 CB   CB   . TRP TRP TRP A A 250 250 . 68.925  9.687  37.307 1.00 54.21  1 . C  ?  
ATOM   1920 CG   CG   . TRP TRP TRP A A 250 250 . 70.359  10.007 36.987 1.00 53.49  1 . C  ?  
ATOM   1921 CD1  CD1  . TRP TRP TRP A A 250 250 . 71.060  9.592  35.900 1.00 50.75  1 . C  ?  
ATOM   1922 CD2  CD2  . TRP TRP TRP A A 250 250 . 71.244  10.859 37.737 1.00 55.16  1 . C  ?  
ATOM   1923 NE1  NE1  . TRP TRP TRP A A 250 250 . 72.339  10.092 35.940 1.00 58.82  1 . N  ?  
ATOM   1924 CE2  CE2  . TRP TRP TRP A A 250 250 . 72.478  10.878 37.055 1.00 59.01  1 . C  ?  
ATOM   1925 CE3  CE3  . TRP TRP TRP A A 250 250 . 71.119  11.586 38.926 1.00 51.10  1 . C  ?  
ATOM   1926 CZ2  CZ2  . TRP TRP TRP A A 250 250 . 73.582  11.610 37.517 1.00 50.91  1 . C  ?  
ATOM   1927 CZ3  CZ3  . TRP TRP TRP A A 250 250 . 72.223  12.307 39.388 1.00 54.07  1 . C  ?  
ATOM   1928 CH2  CH2  . TRP TRP TRP A A 250 250 . 73.435  12.312 38.683 1.00 50.12  1 . C  ?  
ATOM   1929 N    N    . TRP TRP TRP A A 251 251 . 69.399  9.045  40.300 1.00 57.18  1 . N  ?  
ATOM   1930 CA   CA   . TRP TRP TRP A A 251 251 . 70.217  8.943  41.507 1.00 54.32  1 . C  ?  
ATOM   1931 C    C    . TRP TRP TRP A A 251 251 . 70.161  7.542  42.096 1.00 58.70  1 . C  ?  
ATOM   1932 O    O    . TRP TRP TRP A A 251 251 . 71.190  6.990  42.502 1.00 59.08  1 . O  ?  
ATOM   1933 CB   CB   . TRP TRP TRP A A 251 251 . 69.726  9.956  42.531 1.00 50.86  1 . C  ?  
ATOM   1934 CG   CG   . TRP TRP TRP A A 251 251 . 70.611  10.189 43.693 1.00 44.73  1 . C  ?  
ATOM   1935 CD1  CD1  . TRP TRP TRP A A 251 251 . 70.282  10.058 45.011 1.00 42.34  1 . C  ?  
ATOM   1936 CD2  CD2  . TRP TRP TRP A A 251 251 . 71.959  10.660 43.659 1.00 47.14  1 . C  ?  
ATOM   1937 NE1  NE1  . TRP TRP TRP A A 251 251 . 71.347  10.407 45.804 1.00 44.97  1 . N  ?  
ATOM   1938 CE2  CE2  . TRP TRP TRP A A 251 251 . 72.394  10.775 44.998 1.00 46.30  1 . C  ?  
ATOM   1939 CE3  CE3  . TRP TRP TRP A A 251 251 . 72.848  10.984 42.630 1.00 47.71  1 . C  ?  
ATOM   1940 CZ2  CZ2  . TRP TRP TRP A A 251 251 . 73.682  11.182 45.331 1.00 43.55  1 . C  ?  
ATOM   1941 CZ3  CZ3  . TRP TRP TRP A A 251 251 . 74.122  11.398 42.964 1.00 43.51  1 . C  ?  
ATOM   1942 CH2  CH2  . TRP TRP TRP A A 251 251 . 74.525  11.495 44.302 1.00 45.74  1 . C  ?  
ATOM   1943 N    N    . LYS LYS LYS A A 252 252 . 68.957  6.958  42.156 1.00 58.88  1 . N  ?  
ATOM   1944 CA   CA   . LYS LYS LYS A A 252 252 . 68.754  5.660  42.791 1.00 55.81  1 . C  ?  
ATOM   1945 C    C    . LYS LYS LYS A A 252 252 . 69.566  4.568  42.099 1.00 60.95  1 . C  ?  
ATOM   1946 O    O    . LYS LYS LYS A A 252 252 . 70.236  3.761  42.758 1.00 57.20  1 . O  ?  
ATOM   1947 CB   CB   . LYS LYS LYS A A 252 252 . 67.259  5.326  42.772 1.00 63.50  1 . C  ?  
ATOM   1948 CG   CG   . LYS LYS LYS A A 252 252 . 66.786  4.258  43.762 1.00 65.22  1 . C  ?  
ATOM   1949 CD   CD   . LYS LYS LYS A A 252 252 . 65.252  4.235  43.834 1.00 67.53  1 . C  ?  
ATOM   1950 CE   CE   . LYS LYS LYS A A 252 252 . 64.737  2.967  44.513 1.00 73.27  1 . C  ?  
ATOM   1951 NZ   NZ   . LYS LYS LYS A A 252 252 . 65.202  2.862  45.926 1.00 74.30  1 . N  ?  
ATOM   1952 N    N    . ASP ASP ASP A A 253 253 . 69.515  4.527  40.763 1.00 59.06  1 . N  ?  
ATOM   1953 CA   CA   . ASP ASP ASP A A 253 253 . 70.269  3.525  40.014 1.00 60.78  1 . C  ?  
ATOM   1954 C    C    . ASP ASP ASP A A 253 253 . 71.772  3.636  40.273 1.00 62.22  1 . C  ?  
ATOM   1955 O    O    . ASP ASP ASP A A 253 253 . 72.467  2.620  40.367 1.00 66.62  1 . O  ?  
ATOM   1956 CB   CB   . ASP ASP ASP A A 253 253 . 69.971  3.650  38.518 1.00 65.09  1 . C  ?  
ATOM   1957 CG   CG   . ASP ASP ASP A A 253 253 . 68.484  3.503  38.197 1.00 69.14  1 . C  ?  
ATOM   1958 OD1  OD1  . ASP ASP ASP A A 253 253 . 67.718  3.016  39.060 1.00 70.29  1 . O  ?  
ATOM   1959 OD2  OD2  . ASP ASP ASP A A 253 253 . 68.080  3.866  37.071 1.00 76.18  1 . O  ?  
ATOM   1960 N    N    . LEU LEU LEU A A 254 254 . 72.300  4.855  40.381 1.00 60.88  1 . N  ?  
ATOM   1961 CA   CA   . LEU LEU LEU A A 254 254 . 73.713  4.984  40.716 1.00 62.21  1 . C  ?  
ATOM   1962 C    C    . LEU LEU LEU A A 254 254 . 74.023  4.447  42.114 1.00 64.43  1 . C  ?  
ATOM   1963 O    O    . LEU LEU LEU A A 254 254 . 75.167  4.061  42.375 1.00 70.19  1 . O  ?  
ATOM   1964 CB   CB   . LEU LEU LEU A A 254 254 . 74.153  6.449  40.587 1.00 63.01  1 . C  ?  
ATOM   1965 CG   CG   . LEU LEU LEU A A 254 254 . 74.110  7.028  39.173 1.00 57.25  1 . C  ?  
ATOM   1966 CD1  CD1  . LEU LEU LEU A A 254 254 . 74.317  8.529  39.194 1.00 60.13  1 . C  ?  
ATOM   1967 CD2  CD2  . LEU LEU LEU A A 254 254 . 75.150  6.373  38.289 1.00 53.86  1 . C  ?  
ATOM   1968 N    N    . ASP ASP ASP A A 255 255 . 73.035  4.420  43.012 1.00 63.32  1 . N  ?  
ATOM   1969 CA   CA   . ASP ASP ASP A A 255 255 . 73.152  3.847  44.353 1.00 64.44  1 . C  ?  
ATOM   1970 C    C    . ASP ASP ASP A A 255 255 . 74.450  4.224  45.067 1.00 67.36  1 . C  ?  
ATOM   1971 O    O    . ASP ASP ASP A A 255 255 . 75.048  3.390  45.753 1.00 69.42  1 . O  ?  
ATOM   1972 CB   CB   . ASP ASP ASP A A 255 255 . 73.004  2.320  44.275 1.00 67.15  1 . C  ?  
ATOM   1973 CG   CG   . ASP ASP ASP A A 255 255 . 72.854  1.660  45.652 1.00 71.89  1 . C  ?  
ATOM   1974 OD1  OD1  . ASP ASP ASP A A 255 255 . 72.511  2.352  46.642 1.00 71.03  1 . O  ?  
ATOM   1975 OD2  OD2  . ASP ASP ASP A A 255 255 . 73.080  0.431  45.746 1.00 77.78  1 . O  ?  
ATOM   1976 N    N    . PHE PHE PHE A A 256 256 . 74.888  5.480  44.942 1.00 68.26  1 . N  ?  
ATOM   1977 CA   CA   . PHE PHE PHE A A 256 256 . 75.986  5.951  45.781 1.00 65.64  1 . C  ?  
ATOM   1978 C    C    . PHE PHE PHE A A 256 256 . 75.633  5.932  47.267 1.00 68.83  1 . C  ?  
ATOM   1979 O    O    . PHE PHE PHE A A 256 256 . 76.538  6.003  48.107 1.00 72.80  1 . O  ?  
ATOM   1980 CB   CB   . PHE PHE PHE A A 256 256 . 76.405  7.374  45.397 1.00 67.39  1 . C  ?  
ATOM   1981 CG   CG   . PHE PHE PHE A A 256 256 . 76.855  7.516  43.974 1.00 67.65  1 . C  ?  
ATOM   1982 CD1  CD1  . PHE PHE PHE A A 256 256 . 77.366  6.431  43.279 1.00 64.91  1 . C  ?  
ATOM   1983 CD2  CD2  . PHE PHE PHE A A 256 256 . 76.756  8.738  43.326 1.00 61.23  1 . C  ?  
ATOM   1984 CE1  CE1  . PHE PHE PHE A A 256 256 . 77.775  6.558  41.964 1.00 64.10  1 . C  ?  
ATOM   1985 CE2  CE2  . PHE PHE PHE A A 256 256 . 77.161  8.871  42.006 1.00 66.91  1 . C  ?  
ATOM   1986 CZ   CZ   . PHE PHE PHE A A 256 256 . 77.674  7.774  41.323 1.00 66.68  1 . C  ?  
ATOM   1987 N    N    . VAL VAL VAL A A 257 257 . 74.348  5.852  47.621 1.00 66.34  1 . N  ?  
ATOM   1988 CA   CA   . VAL VAL VAL A A 257 257 . 74.002  5.883  49.037 1.00 65.85  1 . C  ?  
ATOM   1989 C    C    . VAL VAL VAL A A 257 257 . 74.459  4.623  49.752 1.00 72.89  1 . C  ?  
ATOM   1990 O    O    . VAL VAL VAL A A 257 257 . 74.640  4.642  50.977 1.00 74.79  1 . O  ?  
ATOM   1991 CB   CB   . VAL VAL VAL A A 257 257 . 72.494  6.094  49.251 1.00 65.01  1 . C  ?  
ATOM   1992 CG1  CG1  . VAL VAL VAL A A 257 257 . 71.690  5.017  48.540 1.00 64.17  1 . C  ?  
ATOM   1993 CG2  CG2  . VAL VAL VAL A A 257 257 . 72.191  6.114  50.740 1.00 59.18  1 . C  ?  
ATOM   1994 N    N    . THR THR THR A A 258 258 . 74.654  3.522  49.026 1.00 71.30  1 . N  ?  
ATOM   1995 CA   CA   . THR THR THR A A 258 258 . 75.248  2.327  49.612 1.00 73.10  1 . C  ?  
ATOM   1996 C    C    . THR THR THR A A 258 258 . 76.700  2.138  49.181 1.00 72.78  1 . C  ?  
ATOM   1997 O    O    . THR THR THR A A 258 258 . 77.561  1.897  50.028 1.00 79.66  1 . O  ?  
ATOM   1998 CB   CB   . THR THR THR A A 258 258 . 74.413  1.072  49.273 1.00 76.28  1 . C  ?  
ATOM   1999 OG1  OG1  . THR THR THR A A 258 258 . 74.551  0.739  47.884 1.00 73.59  1 . O  ?  
ATOM   2000 CG2  CG2  . THR THR THR A A 258 258 . 72.924  1.293  49.600 1.00 63.41  1 . C  ?  
ATOM   2001 N    N    . THR THR THR A A 259 259 . 77.009  2.287  47.887 1.00 71.99  1 . N  ?  
ATOM   2002 CA   CA   . THR THR THR A A 259 259 . 78.378  2.048  47.433 1.00 72.20  1 . C  ?  
ATOM   2003 C    C    . THR THR THR A A 259 259 . 79.346  3.154  47.870 1.00 72.53  1 . C  ?  
ATOM   2004 O    O    . THR THR THR A A 259 259 . 80.548  2.895  48.003 1.00 74.35  1 . O  ?  
ATOM   2005 CB   CB   . THR THR THR A A 259 259 . 78.415  1.874  45.909 1.00 71.31  1 . C  ?  
ATOM   2006 OG1  OG1  . THR THR THR A A 259 259 . 78.040  3.095  45.259 1.00 69.67  1 . O  ?  
ATOM   2007 CG2  CG2  . THR THR THR A A 259 259 . 77.467  0.794  45.487 1.00 66.84  1 . C  ?  
ATOM   2008 N    N    . LEU LEU LEU A A 260 260 . 78.869  4.381  48.090 1.00 72.99  1 . N  ?  
ATOM   2009 CA   CA   . LEU LEU LEU A A 260 260 . 79.732  5.497  48.500 1.00 73.98  1 . C  ?  
ATOM   2010 C    C    . LEU LEU LEU A A 260 260 . 79.198  6.134  49.778 1.00 72.33  1 . C  ?  
ATOM   2011 O    O    . LEU LEU LEU A A 260 260 . 78.924  7.337  49.824 1.00 73.65  1 . O  ?  
ATOM   2012 CB   CB   . LEU LEU LEU A A 260 260 . 79.852  6.538  47.386 1.00 65.31  1 . C  ?  
ATOM   2013 CG   CG   . LEU LEU LEU A A 260 260 . 80.511  6.114  46.069 1.00 68.78  1 . C  ?  
ATOM   2014 CD1  CD1  . LEU LEU LEU A A 260 260 . 80.426  7.239  45.054 1.00 66.89  1 . C  ?  
ATOM   2015 CD2  CD2  . LEU LEU LEU A A 260 260 . 81.957  5.697  46.281 1.00 64.57  1 . C  ?  
ATOM   2016 N    N    . PRO PRO PRO A A 261 261 . 79.061  5.349  50.852 1.00 71.05  1 . N  ?  
ATOM   2017 CA   CA   . PRO PRO PRO A A 261 261 . 78.356  5.835  52.051 1.00 65.57  1 . C  ?  
ATOM   2018 C    C    . PRO PRO PRO A A 261 261 . 79.046  6.982  52.766 1.00 66.79  1 . C  ?  
ATOM   2019 O    O    . PRO PRO PRO A A 261 261 . 78.499  7.492  53.751 1.00 64.86  1 . O  ?  
ATOM   2020 CB   CB   . PRO PRO PRO A A 261 261 . 78.299  4.592  52.947 1.00 66.54  1 . C  ?  
ATOM   2021 CG   CG   . PRO PRO PRO A A 261 261 . 79.444  3.757  52.496 1.00 66.67  1 . C  ?  
ATOM   2022 CD   CD   . PRO PRO PRO A A 261 261 . 79.579  3.982  51.021 1.00 66.94  1 . C  ?  
ATOM   2023 N    N    . TYR TYR TYR A A 262 262 . 80.233  7.391  52.319 1.00 71.51  1 . N  ?  
ATOM   2024 CA   CA   . TYR TYR TYR A A 262 262 . 80.900  8.551  52.893 1.00 68.27  1 . C  ?  
ATOM   2025 C    C    . TYR TYR TYR A A 262 262 . 80.352  9.862  52.348 1.00 67.77  1 . C  ?  
ATOM   2026 O    O    . TYR TYR TYR A A 262 262 . 80.565  10.913 52.965 1.00 64.94  1 . O  ?  
ATOM   2027 CB   CB   . TYR TYR TYR A A 262 262 . 82.409  8.479  52.626 1.00 65.58  1 . C  ?  
ATOM   2028 CG   CG   . TYR TYR TYR A A 262 262 . 82.791  8.563  51.158 1.00 66.34  1 . C  ?  
ATOM   2029 CD1  CD1  . TYR TYR TYR A A 262 262 . 83.017  9.795  50.544 1.00 62.79  1 . C  ?  
ATOM   2030 CD2  CD2  . TYR TYR TYR A A 262 262 . 82.924  7.415  50.385 1.00 63.04  1 . C  ?  
ATOM   2031 CE1  CE1  . TYR TYR TYR A A 262 262 . 83.368  9.880  49.200 1.00 60.05  1 . C  ?  
ATOM   2032 CE2  CE2  . TYR TYR TYR A A 262 262 . 83.277  7.489  49.040 1.00 64.95  1 . C  ?  
ATOM   2033 CZ   CZ   . TYR TYR TYR A A 262 262 . 83.501  8.725  48.452 1.00 64.47  1 . C  ?  
ATOM   2034 OH   OH   . TYR TYR TYR A A 262 262 . 83.850  8.803  47.118 1.00 56.42  1 . O  ?  
ATOM   2035 N    N    . ALA ALA ALA A A 263 263 . 79.656  9.820  51.212 1.00 65.22  1 . N  ?  
ATOM   2036 CA   CA   . ALA ALA ALA A A 263 263 . 79.193  11.028 50.543 1.00 65.69  1 . C  ?  
ATOM   2037 C    C    . ALA ALA ALA A A 263 263 . 77.842  11.489 51.086 1.00 61.31  1 . C  ?  
ATOM   2038 O    O    . ALA ALA ALA A A 263 263 . 77.045  10.699 51.602 1.00 59.83  1 . O  ?  
ATOM   2039 CB   CB   . ALA ALA ALA A A 263 263 . 79.089  10.793 49.035 1.00 62.85  1 . C  ?  
ATOM   2040 N    N    . ARG ARG ARG A A 264 264 . 77.597  12.790 50.974 1.00 63.48  1 . N  ?  
ATOM   2041 CA   CA   . ARG ARG ARG A A 264 264 . 76.291  13.325 51.321 1.00 62.79  1 . C  ?  
ATOM   2042 C    C    . ARG ARG ARG A A 264 264 . 75.247  12.835 50.326 1.00 61.37  1 . C  ?  
ATOM   2043 O    O    . ARG ARG ARG A A 264 264 . 75.497  12.752 49.121 1.00 60.05  1 . O  ?  
ATOM   2044 CB   CB   . ARG ARG ARG A A 264 264 . 76.325  14.851 51.354 1.00 61.00  1 . C  ?  
ATOM   2045 CG   CG   . ARG ARG ARG A A 264 264 . 77.083  15.400 52.546 1.00 65.13  1 . C  ?  
ATOM   2046 CD   CD   . ARG ARG ARG A A 264 264 . 77.411  16.866 52.380 1.00 64.78  1 . C  ?  
ATOM   2047 NE   NE   . ARG ARG ARG A A 264 264 . 78.082  17.117 51.111 1.00 63.50  1 . N  ?  
ATOM   2048 CZ   CZ   . ARG ARG ARG A A 264 264 . 78.685  18.260 50.798 1.00 63.41  1 . C  ?  
ATOM   2049 NH1  NH1  . ARG ARG ARG A A 264 264 . 78.698  19.256 51.672 1.00 60.51  1 . N  ?  
ATOM   2050 NH2  NH2  . ARG ARG ARG A A 264 264 . 79.276  18.400 49.616 1.00 61.53  1 . N  ?  
ATOM   2051 N    N    . ASP ASP ASP A A 265 265 . 74.079  12.487 50.846 1.00 53.65  1 . N  ?  
ATOM   2052 CA   CA   . ASP ASP ASP A A 265 265 . 72.956  12.009 50.049 1.00 55.12  1 . C  ?  
ATOM   2053 C    C    . ASP ASP ASP A A 265 265 . 71.934  13.152 49.952 1.00 54.40  1 . C  ?  
ATOM   2054 O    O    . ASP ASP ASP A A 265 265 . 71.121  13.357 50.862 1.00 48.73  1 . O  ?  
ATOM   2055 CB   CB   . ASP ASP ASP A A 265 265 . 72.396  10.752 50.705 1.00 52.67  1 . C  ?  
ATOM   2056 CG   CG   . ASP ASP ASP A A 265 265 . 71.257  10.150 49.945 1.00 59.56  1 . C  ?  
ATOM   2057 OD1  OD1  . ASP ASP ASP A A 265 265 . 71.083  10.499 48.749 1.00 57.32  1 . O  ?  
ATOM   2058 OD2  OD2  . ASP ASP ASP A A 265 265 . 70.545  9.321  50.561 1.00 61.36  1 . O  ?  
ATOM   2059 N    N    . ARG ARG ARG A A 266 266 . 71.987  13.915 48.840 1.00 48.00  1 . N  ?  
ATOM   2060 CA   CA   . ARG ARG ARG A A 266 266 . 71.291  15.203 48.787 1.00 54.98  1 . C  ?  
ATOM   2061 C    C    . ARG ARG ARG A A 266 266 . 70.740  15.533 47.403 1.00 47.57  1 . C  ?  
ATOM   2062 O    O    . ARG ARG ARG A A 266 266 . 70.762  16.699 46.998 1.00 47.92  1 . O  ?  
ATOM   2063 CB   CB   . ARG ARG ARG A A 266 266 . 72.226  16.358 49.204 1.00 53.58  1 . C  ?  
ATOM   2064 CG   CG   . ARG ARG ARG A A 266 266 . 72.766  16.270 50.604 1.00 50.50  1 . C  ?  
ATOM   2065 CD   CD   . ARG ARG ARG A A 266 266 . 71.720  16.679 51.604 1.00 52.76  1 . C  ?  
ATOM   2066 NE   NE   . ARG ARG ARG A A 266 266 . 72.274  16.664 52.950 1.00 59.60  1 . N  ?  
ATOM   2067 CZ   CZ   . ARG ARG ARG A A 266 266 . 72.375  15.569 53.695 1.00 64.38  1 . C  ?  
ATOM   2068 NH1  NH1  . ARG ARG ARG A A 266 266 . 71.944  14.401 53.222 1.00 58.07  1 . N  ?  
ATOM   2069 NH2  NH2  . ARG ARG ARG A A 266 266 . 72.903  15.644 54.910 1.00 64.33  1 . N  ?  
ATOM   2070 N    N    . VAL VAL VAL A A 267 267 . 70.262  14.548 46.656 1.00 47.98  1 . N  ?  
ATOM   2071 CA   CA   . VAL VAL VAL A A 267 267 . 69.806  14.861 45.309 1.00 48.12  1 . C  ?  
ATOM   2072 C    C    . VAL VAL VAL A A 267 267 . 68.613  15.813 45.340 1.00 47.13  1 . C  ?  
ATOM   2073 O    O    . VAL VAL VAL A A 267 267 . 68.448  16.625 44.424 1.00 50.95  1 . O  ?  
ATOM   2074 CB   CB   . VAL VAL VAL A A 267 267 . 69.492  13.562 44.537 1.00 43.83  1 . C  ?  
ATOM   2075 CG1  CG1  . VAL VAL VAL A A 267 267 . 68.040  13.161 44.729 1.00 42.54  1 . C  ?  
ATOM   2076 CG2  CG2  . VAL VAL VAL A A 267 267 . 69.831  13.728 43.064 1.00 43.14  1 . C  ?  
ATOM   2077 N    N    . VAL VAL VAL A A 268 268 . 67.767  15.741 46.379 1.00 46.65  1 . N  ?  
ATOM   2078 CA   CA   . VAL VAL VAL A A 268 268 . 66.613  16.642 46.470 1.00 46.01  1 . C  ?  
ATOM   2079 C    C    . VAL VAL VAL A A 268 268 . 67.071  18.079 46.683 1.00 49.94  1 . C  ?  
ATOM   2080 O    O    . VAL VAL VAL A A 268 268 . 66.514  19.019 46.095 1.00 47.00  1 . O  ?  
ATOM   2081 CB   CB   . VAL VAL VAL A A 268 268 . 65.647  16.209 47.592 1.00 50.05  1 . C  ?  
ATOM   2082 CG1  CG1  . VAL VAL VAL A A 268 268 . 64.402  17.099 47.596 1.00 38.43  1 . C  ?  
ATOM   2083 CG2  CG2  . VAL VAL VAL A A 268 268 . 65.270  14.732 47.461 1.00 50.05  1 . C  ?  
ATOM   2084 N    N    . GLU GLU GLU A A 269 269 . 68.063  18.273 47.557 1.00 45.29  1 . N  ?  
ATOM   2085 CA   CA   . GLU GLU GLU A A 269 269 . 68.623  19.598 47.768 1.00 45.02  1 . C  ?  
ATOM   2086 C    C    . GLU GLU GLU A A 269 269 . 69.269  20.118 46.491 1.00 49.87  1 . C  ?  
ATOM   2087 O    O    . GLU GLU GLU A A 269 269 . 69.100  21.295 46.132 1.00 41.30  1 . O  ?  
ATOM   2088 CB   CB   . GLU GLU GLU A A 269 269 . 69.633  19.571 48.918 1.00 46.19  1 . C  ?  
ATOM   2089 CG   CG   . GLU GLU GLU A A 269 269 . 69.034  19.345 50.306 1.00 49.29  1 . C  ?  
ATOM   2090 CD   CD   . GLU GLU GLU A A 269 269 . 68.413  17.946 50.482 1.00 56.14  1 . C  ?  
ATOM   2091 OE1  OE1  . GLU GLU GLU A A 269 269 . 68.528  17.104 49.562 1.00 50.85  1 . O  ?  
ATOM   2092 OE2  OE2  . GLU GLU GLU A A 269 269 . 67.807  17.692 51.548 1.00 53.54  1 . O  ?  
ATOM   2093 N    N    . CYS CYS CYS A A 270 270 . 69.999  19.248 45.780 1.00 47.49  1 . N  ?  
ATOM   2094 CA   CA   . CYS CYS CYS A A 270 270 . 70.589  19.657 44.509 1.00 45.77  1 . C  ?  
ATOM   2095 C    C    . CYS CYS CYS A A 270 270 . 69.508  20.116 43.547 1.00 48.54  1 . C  ?  
ATOM   2096 O    O    . CYS CYS CYS A A 270 270 . 69.690  21.093 42.811 1.00 45.30  1 . O  ?  
ATOM   2097 CB   CB   . CYS CYS CYS A A 270 270 . 71.397  18.514 43.903 1.00 45.38  1 . C  ?  
ATOM   2098 SG   SG   . CYS CYS CYS A A 270 270 . 72.838  18.052 44.899 1.00 54.18  1 . S  ?  
ATOM   2099 N    N    . TYR TYR TYR A A 271 271 . 68.367  19.430 43.548 1.00 47.36  1 . N  ?  
ATOM   2100 CA   CA   . TYR TYR TYR A A 271 271 . 67.288  19.856 42.673 1.00 44.82  1 . C  ?  
ATOM   2101 C    C    . TYR TYR TYR A A 271 271 . 66.787  21.240 43.060 1.00 44.23  1 . C  ?  
ATOM   2102 O    O    . TYR TYR TYR A A 271 271 . 66.557  22.088 42.186 1.00 43.25  1 . O  ?  
ATOM   2103 CB   CB   . TYR TYR TYR A A 271 271 . 66.134  18.853 42.683 1.00 41.63  1 . C  ?  
ATOM   2104 CG   CG   . TYR TYR TYR A A 271 271 . 65.104  19.276 41.680 1.00 40.49  1 . C  ?  
ATOM   2105 CD1  CD1  . TYR TYR TYR A A 271 271 . 65.245  18.952 40.343 1.00 39.22  1 . C  ?  
ATOM   2106 CD2  CD2  . TYR TYR TYR A A 271 271 . 64.027  20.061 42.058 1.00 41.31  1 . C  ?  
ATOM   2107 CE1  CE1  . TYR TYR TYR A A 271 271 . 64.319  19.360 39.412 1.00 42.21  1 . C  ?  
ATOM   2108 CE2  CE2  . TYR TYR TYR A A 271 271 . 63.093  20.479 41.141 1.00 43.49  1 . C  ?  
ATOM   2109 CZ   CZ   . TYR TYR TYR A A 271 271 . 63.237  20.129 39.814 1.00 46.19  1 . C  ?  
ATOM   2110 OH   OH   . TYR TYR TYR A A 271 271 . 62.299  20.564 38.892 1.00 44.97  1 . O  ?  
ATOM   2111 N    N    . PHE PHE PHE A A 272 272 . 66.602  21.493 44.358 1.00 41.89  1 . N  ?  
ATOM   2112 CA   CA   . PHE PHE PHE A A 272 272 . 66.156  22.820 44.765 1.00 37.09  1 . C  ?  
ATOM   2113 C    C    . PHE PHE PHE A A 272 272 . 67.127  23.884 44.261 1.00 42.05  1 . C  ?  
ATOM   2114 O    O    . PHE PHE PHE A A 272 272 . 66.711  24.888 43.670 1.00 41.76  1 . O  ?  
ATOM   2115 CB   CB   . PHE PHE PHE A A 272 272 . 65.999  22.900 46.283 1.00 33.88  1 . C  ?  
ATOM   2116 CG   CG   . PHE PHE PHE A A 272 272 . 65.871  24.303 46.786 1.00 40.63  1 . C  ?  
ATOM   2117 CD1  CD1  . PHE PHE PHE A A 272 272 . 64.620  24.932 46.820 1.00 40.68  1 . C  ?  
ATOM   2118 CD2  CD2  . PHE PHE PHE A A 272 272 . 67.000  25.021 47.187 1.00 39.31  1 . C  ?  
ATOM   2119 CE1  CE1  . PHE PHE PHE A A 272 272 . 64.499  26.242 47.260 1.00 39.16  1 . C  ?  
ATOM   2120 CE2  CE2  . PHE PHE PHE A A 272 272 . 66.889  26.323 47.635 1.00 37.66  1 . C  ?  
ATOM   2121 CZ   CZ   . PHE PHE PHE A A 272 272 . 65.637  26.944 47.665 1.00 38.12  1 . C  ?  
ATOM   2122 N    N    . GLU GLU GLU A A 273 273 . 68.435  23.663 44.461 1.00 41.29  1 . N  ?  
ATOM   2123 CA   CA   . GLU GLU GLU A A 273 273 . 69.429  24.603 43.956 1.00 41.12  1 . C  ?  
ATOM   2124 C    C    . GLU GLU GLU A A 273 273 . 69.256  24.830 42.459 1.00 39.63  1 . C  ?  
ATOM   2125 O    O    . GLU GLU GLU A A 273 273 . 69.276  25.970 41.989 1.00 39.41  1 . O  ?  
ATOM   2126 CB   CB   . GLU GLU GLU A A 273 273 . 70.848  24.111 44.272 1.00 41.69  1 . C  ?  
ATOM   2127 CG   CG   . GLU GLU GLU A A 273 273 . 71.143  23.821 45.753 1.00 43.49  1 . C  ?  
ATOM   2128 CD   CD   . GLU GLU GLU A A 273 273 . 70.923  25.025 46.688 1.00 49.92  1 . C  ?  
ATOM   2129 OE1  OE1  . GLU GLU GLU A A 273 273 . 70.565  26.124 46.208 1.00 48.40  1 . O  ?  
ATOM   2130 OE2  OE2  . GLU GLU GLU A A 273 273 . 71.111  24.875 47.921 1.00 49.55  1 . O  ?  
ATOM   2131 N    N    . ALA ALA ALA A A 274 274 . 69.066  23.763 41.695 1.00 39.68  1 . N  ?  
ATOM   2132 CA   CA   . ALA ALA ALA A A 274 274 . 68.947  23.937 40.252 1.00 42.95  1 . C  ?  
ATOM   2133 C    C    . ALA ALA ALA A A 274 274 . 67.633  24.607 39.878 1.00 42.98  1 . C  ?  
ATOM   2134 O    O    . ALA ALA ALA A A 274 274 . 67.552  25.275 38.840 1.00 42.99  1 . O  ?  
ATOM   2135 CB   CB   . ALA ALA ALA A A 274 274 . 69.085  22.588 39.538 1.00 40.02  1 . C  ?  
ATOM   2136 N    N    . LEU LEU LEU A A 275 275 . 66.594  24.429 40.700 1.00 43.75  1 . N  ?  
ATOM   2137 CA   CA   . LEU LEU LEU A A 275 275 . 65.320  25.100 40.467 1.00 42.36  1 . C  ?  
ATOM   2138 C    C    . LEU LEU LEU A A 275 275 . 65.386  26.581 40.826 1.00 40.33  1 . C  ?  
ATOM   2139 O    O    . LEU LEU LEU A A 275 275 . 64.532  27.351 40.382 1.00 37.99  1 . O  ?  
ATOM   2140 CB   CB   . LEU LEU LEU A A 275 275 . 64.209  24.393 41.257 1.00 41.69  1 . C  ?  
ATOM   2141 CG   CG   . LEU LEU LEU A A 275 275 . 62.767  24.929 41.161 1.00 42.96  1 . C  ?  
ATOM   2142 CD1  CD1  . LEU LEU LEU A A 275 275 . 62.232  24.885 39.738 1.00 39.31  1 . C  ?  
ATOM   2143 CD2  CD2  . LEU LEU LEU A A 275 275 . 61.862  24.136 42.088 1.00 39.70  1 . C  ?  
ATOM   2144 N    N    . GLY GLY GLY A A 276 276 . 66.380  26.988 41.620 1.00 41.45  1 . N  ?  
ATOM   2145 CA   CA   . GLY GLY GLY A A 276 276 . 66.633  28.400 41.836 1.00 36.94  1 . C  ?  
ATOM   2146 C    C    . GLY GLY GLY A A 276 276 . 67.324  29.060 40.660 1.00 41.71  1 . C  ?  
ATOM   2147 O    O    . GLY GLY GLY A A 276 276 . 67.101  30.245 40.388 1.00 42.17  1 . O  ?  
ATOM   2148 N    N    . VAL VAL VAL A A 277 277 . 68.152  28.307 39.934 1.00 41.20  1 . N  ?  
ATOM   2149 CA   CA   . VAL VAL VAL A A 277 277 . 68.854  28.876 38.788 1.00 39.21  1 . C  ?  
ATOM   2150 C    C    . VAL VAL VAL A A 277 277 . 67.871  29.195 37.673 1.00 42.41  1 . C  ?  
ATOM   2151 O    O    . VAL VAL VAL A A 277 277 . 68.000  30.214 36.984 1.00 45.51  1 . O  ?  
ATOM   2152 CB   CB   . VAL VAL VAL A A 277 277 . 69.965  27.928 38.308 1.00 40.39  1 . C  ?  
ATOM   2153 CG1  CG1  . VAL VAL VAL A A 277 277 . 70.598  28.489 37.065 1.00 36.60  1 . C  ?  
ATOM   2154 CG2  CG2  . VAL VAL VAL A A 277 277 . 71.004  27.701 39.407 1.00 33.95  1 . C  ?  
ATOM   2155 N    N    . TYR TYR TYR A A 278 278 . 66.888  28.330 37.465 1.00 37.93  1 . N  ?  
ATOM   2156 CA   CA   . TYR TYR TYR A A 278 278 . 65.765  28.667 36.607 1.00 38.19  1 . C  ?  
ATOM   2157 C    C    . TYR TYR TYR A A 278 278 . 64.606  27.733 36.941 1.00 44.55  1 . C  ?  
ATOM   2158 O    O    . TYR TYR TYR A A 278 278 . 64.814  26.554 37.259 1.00 44.53  1 . O  ?  
ATOM   2159 CB   CB   . TYR TYR TYR A A 278 278 . 66.117  28.606 35.111 1.00 38.84  1 . C  ?  
ATOM   2160 CG   CG   . TYR TYR TYR A A 278 278 . 67.311  27.750 34.713 1.00 41.14  1 . C  ?  
ATOM   2161 CD1  CD1  . TYR TYR TYR A A 278 278 . 67.543  26.509 35.303 1.00 43.76  1 . C  ?  
ATOM   2162 CD2  CD2  . TYR TYR TYR A A 278 278 . 68.175  28.160 33.704 1.00 38.62  1 . C  ?  
ATOM   2163 CE1  CE1  . TYR TYR TYR A A 278 278 . 68.633  25.721 34.929 1.00 43.83  1 . C  ?  
ATOM   2164 CE2  CE2  . TYR TYR TYR A A 278 278 . 69.258  27.371 33.316 1.00 42.47  1 . C  ?  
ATOM   2165 CZ   CZ   . TYR TYR TYR A A 278 278 . 69.479  26.151 33.936 1.00 42.01  1 . C  ?  
ATOM   2166 OH   OH   . TYR TYR TYR A A 278 278 . 70.549  25.362 33.575 1.00 39.41  1 . O  ?  
ATOM   2167 N    N    . PHE PHE PHE A A 279 279 . 63.387  28.283 36.900 1.00 39.82  1 . N  ?  
ATOM   2168 CA   CA   . PHE PHE PHE A A 279 279 . 62.182  27.519 37.167 1.00 38.01  1 . C  ?  
ATOM   2169 C    C    . PHE PHE PHE A A 279 279 . 61.269  27.403 35.960 1.00 42.59  1 . C  ?  
ATOM   2170 O    O    . PHE PHE PHE A A 279 279 . 60.397  26.529 35.949 1.00 44.12  1 . O  ?  
ATOM   2171 CB   CB   . PHE PHE PHE A A 279 279 . 61.386  28.156 38.315 1.00 38.36  1 . C  ?  
ATOM   2172 CG   CG   . PHE PHE PHE A A 279 279 . 60.762  29.469 37.944 1.00 38.69  1 . C  ?  
ATOM   2173 CD2  CD2  . PHE PHE PHE A A 279 279 . 59.490  29.522 37.419 1.00 35.98  1 . C  ?  
ATOM   2174 CD1  CD1  . PHE PHE PHE A A 279 279 . 61.482  30.654 38.070 1.00 41.89  1 . C  ?  
ATOM   2175 CE2  CE2  . PHE PHE PHE A A 279 279 . 58.926  30.743 37.056 1.00 45.20  1 . C  ?  
ATOM   2176 CE1  CE1  . PHE PHE PHE A A 279 279 . 60.935  31.861 37.700 1.00 34.79  1 . C  ?  
ATOM   2177 CZ   CZ   . PHE PHE PHE A A 279 279 . 59.656  31.916 37.194 1.00 38.04  1 . C  ?  
ATOM   2178 N    N    . GLU GLU GLU A A 280 280 . 61.438  28.251 34.951 1.00 39.02  1 . N  ?  
ATOM   2179 CA   CA   . GLU GLU GLU A A 280 280 . 60.489  28.255 33.855 1.00 40.08  1 . C  ?  
ATOM   2180 C    C    . GLU GLU GLU A A 280 280 . 60.525  26.905 33.131 1.00 44.30  1 . C  ?  
ATOM   2181 O    O    . GLU GLU GLU A A 280 280 . 61.549  26.205 33.151 1.00 44.14  1 . O  ?  
ATOM   2182 CB   CB   . GLU GLU GLU A A 280 280 . 60.787  29.405 32.892 1.00 44.23  1 . C  ?  
ATOM   2183 CG   CG   . GLU GLU GLU A A 280 280 . 60.663  30.809 33.501 1.00 41.19  1 . C  ?  
ATOM   2184 CD   CD   . GLU GLU GLU A A 280 280 . 61.991  31.355 34.106 1.00 50.02  1 . C  ?  
ATOM   2185 OE1  OE1  . GLU GLU GLU A A 280 280 . 62.818  30.564 34.648 1.00 42.17  1 . O  ?  
ATOM   2186 OE2  OE2  . GLU GLU GLU A A 280 280 . 62.202  32.596 34.038 1.00 53.67  1 . O  ?  
ATOM   2187 N    N    . PRO PRO PRO A A 281 281 . 59.417  26.501 32.496 1.00 42.58  1 . N  ?  
ATOM   2188 CA   CA   . PRO PRO PRO A A 281 281 . 59.392  25.164 31.865 1.00 43.46  1 . C  ?  
ATOM   2189 C    C    . PRO PRO PRO A A 281 281 . 60.339  25.036 30.687 1.00 42.87  1 . C  ?  
ATOM   2190 O    O    . PRO PRO PRO A A 281 281 . 60.827  23.933 30.410 1.00 49.89  1 . O  ?  
ATOM   2191 CB   CB   . PRO PRO PRO A A 281 281 . 57.925  24.996 31.433 1.00 38.29  1 . C  ?  
ATOM   2192 CG   CG   . PRO PRO PRO A A 281 281 . 57.366  26.392 31.358 1.00 36.09  1 . C  ?  
ATOM   2193 CD   CD   . PRO PRO PRO A A 281 281 . 58.135  27.218 32.353 1.00 41.58  1 . C  ?  
ATOM   2194 N    N    . GLN GLN GLN A A 282 282 . 60.618  26.127 29.982 1.00 45.52  1 . N  ?  
ATOM   2195 CA   CA   . GLN GLN GLN A A 282 282 . 61.521  26.082 28.839 1.00 47.13  1 . C  ?  
ATOM   2196 C    C    . GLN GLN GLN A A 282 282 . 62.919  25.628 29.221 1.00 48.13  1 . C  ?  
ATOM   2197 O    O    . GLN GLN GLN A A 282 282 . 63.729  25.334 28.338 1.00 51.32  1 . O  ?  
ATOM   2198 CB   CB   . GLN GLN GLN A A 282 282 . 61.600  27.464 28.205 1.00 49.35  1 . C  ?  
ATOM   2199 CG   CG   . GLN GLN GLN A A 282 282 . 60.864  28.519 29.003 1.00 50.30  1 . C  ?  
ATOM   2200 CD   CD   . GLN GLN GLN A A 282 282 . 61.604  29.838 28.989 1.00 64.14  1 . C  ?  
ATOM   2201 OE1  OE1  . GLN GLN GLN A A 282 282 . 62.681  29.957 28.378 1.00 58.32  1 . O  ?  
ATOM   2202 NE2  NE2  . GLN GLN GLN A A 282 282 . 61.033  30.848 29.663 1.00 65.84  1 . N  ?  
ATOM   2203 N    N    . TYR TYR TYR A A 283 283 . 63.227  25.592 30.510 1.00 46.25  1 . N  ?  
ATOM   2204 CA   CA   . TYR TYR TYR A A 283 283 . 64.538  25.204 31.004 1.00 45.40  1 . C  ?  
ATOM   2205 C    C    . TYR TYR TYR A A 283 283 . 64.495  23.838 31.665 1.00 45.10  1 . C  ?  
ATOM   2206 O    O    . TYR TYR TYR A A 283 283 . 65.387  23.496 32.452 1.00 46.91  1 . O  ?  
ATOM   2207 CB   CB   . TYR TYR TYR A A 283 283 . 65.058  26.263 31.975 1.00 41.91  1 . C  ?  
ATOM   2208 CG   CG   . TYR TYR TYR A A 283 283 . 65.248  27.608 31.331 1.00 41.64  1 . C  ?  
ATOM   2209 CD1  CD1  . TYR TYR TYR A A 283 283 . 66.005  27.740 30.173 1.00 50.38  1 . C  ?  
ATOM   2210 CD2  CD2  . TYR TYR TYR A A 283 283 . 64.654  28.745 31.854 1.00 46.30  1 . C  ?  
ATOM   2211 CE1  CE1  . TYR TYR TYR A A 283 283 . 66.188  28.985 29.568 1.00 50.15  1 . C  ?  
ATOM   2212 CE2  CE2  . TYR TYR TYR A A 283 283 . 64.828  29.990 31.249 1.00 45.45  1 . C  ?  
ATOM   2213 CZ   CZ   . TYR TYR TYR A A 283 283 . 65.595  30.090 30.113 1.00 42.63  1 . C  ?  
ATOM   2214 OH   OH   . TYR TYR TYR A A 283 283 . 65.781  31.288 29.503 1.00 45.53  1 . O  ?  
ATOM   2215 N    N    . SER SER SER A A 284 284 . 63.456  23.058 31.367 1.00 43.85  1 . N  ?  
ATOM   2216 CA   CA   . SER SER SER A A 284 284 . 63.340  21.715 31.914 1.00 43.78  1 . C  ?  
ATOM   2217 C    C    . SER SER SER A A 284 284 . 64.596  20.892 31.628 1.00 43.42  1 . C  ?  
ATOM   2218 O    O    . SER SER SER A A 284 284 . 65.197  20.309 32.540 1.00 43.78  1 . O  ?  
ATOM   2219 CB   CB   . SER SER SER A A 284 284 . 62.086  21.044 31.340 1.00 43.91  1 . C  ?  
ATOM   2220 OG   OG   . SER SER SER A A 284 284 . 61.781  19.832 32.018 1.00 44.59  1 . O  ?  
ATOM   2221 N    N    . GLN GLN GLN A A 285 285 . 65.018  20.845 30.363 1.00 44.76  1 . N  ?  
ATOM   2222 CA   CA   . GLN GLN GLN A A 285 285 . 66.194  20.050 30.017 1.00 51.06  1 . C  ?  
ATOM   2223 C    C    . GLN GLN GLN A A 285 285 . 67.440  20.582 30.709 1.00 52.00  1 . C  ?  
ATOM   2224 O    O    . GLN GLN GLN A A 285 285 . 68.245  19.811 31.252 1.00 49.68  1 . O  ?  
ATOM   2225 CB   CB   . GLN GLN GLN A A 285 285 . 66.409  20.034 28.506 1.00 55.68  1 . C  ?  
ATOM   2226 CG   CG   . GLN GLN GLN A A 285 285 . 67.582  19.158 28.109 1.00 57.67  1 . C  ?  
ATOM   2227 CD   CD   . GLN GLN GLN A A 285 285 . 67.850  19.183 26.625 1.00 61.43  1 . C  ?  
ATOM   2228 OE1  OE1  . GLN GLN GLN A A 285 285 . 67.398  20.084 25.913 1.00 62.99  1 . O  ?  
ATOM   2229 NE2  NE2  . GLN GLN GLN A A 285 285 . 68.589  18.191 26.145 1.00 65.03  1 . N  ?  
ATOM   2230 N    N    . ALA ALA ALA A A 286 286 . 67.623  21.907 30.675 1.00 49.43  1 . N  ?  
ATOM   2231 CA   CA   . ALA ALA ALA A A 286 286 . 68.762  22.531 31.339 1.00 44.52  1 . C  ?  
ATOM   2232 C    C    . ALA ALA ALA A A 286 286 . 68.747  22.248 32.832 1.00 43.93  1 . C  ?  
ATOM   2233 O    O    . ALA ALA ALA A A 286 286 . 69.791  21.942 33.433 1.00 41.18  1 . O  ?  
ATOM   2234 CB   CB   . ALA ALA ALA A A 286 286 . 68.743  24.036 31.075 1.00 45.28  1 . C  ?  
ATOM   2235 N    N    . ARG ARG ARG A A 287 287 . 67.563  22.346 33.447 1.00 43.32  1 . N  ?  
ATOM   2236 CA   CA   . ARG ARG ARG A A 287 287 . 67.426  22.071 34.873 1.00 42.78  1 . C  ?  
ATOM   2237 C    C    . ARG ARG ARG A A 287 287 . 67.882  20.657 35.217 1.00 44.61  1 . C  ?  
ATOM   2238 O    O    . ARG ARG ARG A A 287 287 . 68.611  20.464 36.199 1.00 46.00  1 . O  ?  
ATOM   2239 CB   CB   . ARG ARG ARG A A 287 287 . 65.978  22.286 35.306 1.00 43.57  1 . C  ?  
ATOM   2240 CG   CG   . ARG ARG ARG A A 287 287 . 65.817  23.177 36.500 1.00 44.81  1 . C  ?  
ATOM   2241 CD   CD   . ARG ARG ARG A A 287 287 . 64.396  23.155 37.051 1.00 43.26  1 . C  ?  
ATOM   2242 NE   NE   . ARG ARG ARG A A 287 287 . 63.392  22.917 36.026 1.00 40.78  1 . N  ?  
ATOM   2243 CZ   CZ   . ARG ARG ARG A A 287 287 . 62.798  23.862 35.313 1.00 43.28  1 . C  ?  
ATOM   2244 NH1  NH1  . ARG ARG ARG A A 287 287 . 63.106  25.142 35.502 1.00 41.09  1 . N  ?  
ATOM   2245 NH2  NH2  . ARG ARG ARG A A 287 287 . 61.888  23.521 34.410 1.00 45.34  1 . N  ?  
ATOM   2246 N    N    . VAL VAL VAL A A 288 288 . 67.479  19.654 34.421 1.00 42.42  1 . N  ?  
ATOM   2247 CA   CA   . VAL VAL VAL A A 288 288 . 67.810  18.276 34.780 1.00 43.09  1 . C  ?  
ATOM   2248 C    C    . VAL VAL VAL A A 288 288 . 69.306  18.017 34.614 1.00 46.00  1 . C  ?  
ATOM   2249 O    O    . VAL VAL VAL A A 288 288 . 69.940  17.403 35.485 1.00 48.09  1 . O  ?  
ATOM   2250 CB   CB   . VAL VAL VAL A A 288 288 . 66.958  17.270 33.978 1.00 45.94  1 . C  ?  
ATOM   2251 CG1  CG1  . VAL VAL VAL A A 288 288 . 67.386  15.833 34.300 1.00 43.05  1 . C  ?  
ATOM   2252 CG2  CG2  . VAL VAL VAL A A 288 288 . 65.515  17.432 34.327 1.00 38.28  1 . C  ?  
ATOM   2253 N    N    . MET MET MET A A 289 289 . 69.902  18.489 33.510 1.00 44.07  1 . N  ?  
ATOM   2254 CA   CA   . MET MET MET A A 289 289 . 71.360  18.405 33.381 1.00 48.67  1 . C  ?  
ATOM   2255 C    C    . MET MET MET A A 289 289 . 72.062  19.074 34.557 1.00 47.70  1 . C  ?  
ATOM   2256 O    O    . MET MET MET A A 289 289 . 72.997  18.504 35.132 1.00 49.54  1 . O  ?  
ATOM   2257 CB   CB   . MET MET MET A A 289 289 . 71.825  19.031 32.065 1.00 45.98  1 . C  ?  
ATOM   2258 CG   CG   . MET MET MET A A 289 289 . 71.103  18.492 30.843 1.00 51.91  1 . C  ?  
ATOM   2259 SD   SD   . MET MET MET A A 289 289 . 71.627  19.197 29.257 1.00 59.36  1 . S  ?  
ATOM   2260 CE   CE   . MET MET MET A A 289 289 . 73.105  18.249 28.935 1.00 57.79  1 . C  ?  
ATOM   2261 N    N    . LEU LEU LEU A A 290 290 . 71.616  20.278 34.946 1.00 48.29  1 . N  ?  
ATOM   2262 CA   CA   . LEU LEU LEU A A 290 290 . 72.291  21.008 36.019 1.00 42.77  1 . C  ?  
ATOM   2263 C    C    . LEU LEU LEU A A 290 290 . 72.257  20.234 37.333 1.00 45.97  1 . C  ?  
ATOM   2264 O    O    . LEU LEU LEU A A 290 290 . 73.280  20.137 38.020 1.00 44.35  1 . O  ?  
ATOM   2265 CB   CB   . LEU LEU LEU A A 290 290 . 71.663  22.393 36.198 1.00 42.47  1 . C  ?  
ATOM   2266 CG   CG   . LEU LEU LEU A A 290 290 . 72.251  23.293 37.294 1.00 42.92  1 . C  ?  
ATOM   2267 CD1  CD1  . LEU LEU LEU A A 290 290 . 73.763  23.425 37.149 1.00 39.62  1 . C  ?  
ATOM   2268 CD2  CD2  . LEU LEU LEU A A 290 290 . 71.616  24.666 37.273 1.00 42.64  1 . C  ?  
ATOM   2269 N    N    . VAL VAL VAL A A 291 291 . 71.086  19.682 37.705 1.00 45.61  1 . N  ?  
ATOM   2270 CA   CA   . VAL VAL VAL A A 291 291 . 70.978  18.901 38.945 1.00 42.33  1 . C  ?  
ATOM   2271 C    C    . VAL VAL VAL A A 291 291 . 71.972  17.761 38.948 1.00 41.98  1 . C  ?  
ATOM   2272 O    O    . VAL VAL VAL A A 291 291 . 72.579  17.452 39.979 1.00 44.68  1 . O  ?  
ATOM   2273 CB   CB   . VAL VAL VAL A A 291 291 . 69.561  18.338 39.145 1.00 49.16  1 . C  ?  
ATOM   2274 CG1  CG1  . VAL VAL VAL A A 291 291 . 69.447  17.750 40.543 1.00 44.44  1 . C  ?  
ATOM   2275 CG2  CG2  . VAL VAL VAL A A 291 291 . 68.529  19.402 38.913 1.00 51.40  1 . C  ?  
ATOM   2276 N    N    . LYS LYS LYS A A 292 292 . 72.112  17.080 37.812 1.00 46.44  1 . N  ?  
ATOM   2277 CA   CA   . LYS LYS LYS A A 292 292 . 72.981  15.908 37.769 1.00 50.12  1 . C  ?  
ATOM   2278 C    C    . LYS LYS LYS A A 292 292 . 74.423  16.291 38.057 1.00 47.32  1 . C  ?  
ATOM   2279 O    O    . LYS LYS LYS A A 292 292 . 75.098  15.633 38.863 1.00 47.12  1 . O  ?  
ATOM   2280 CB   CB   . LYS LYS LYS A A 292 292 . 72.845  15.209 36.418 1.00 50.16  1 . C  ?  
ATOM   2281 CG   CG   . LYS LYS LYS A A 292 292 . 71.619  14.325 36.329 1.00 46.94  1 . C  ?  
ATOM   2282 CD   CD   . LYS LYS LYS A A 292 292 . 71.325  13.942 34.895 1.00 51.00  1 . C  ?  
ATOM   2283 CE   CE   . LYS LYS LYS A A 292 292 . 70.269  12.859 34.849 1.00 50.34  1 . C  ?  
ATOM   2284 NZ   NZ   . LYS LYS LYS A A 292 292 . 69.617  12.818 33.517 1.00 57.05  1 . N  ?  
ATOM   2285 N    N    . THR THR THR A A 293 293 . 74.893  17.392 37.455 1.00 49.49  1 . N  ?  
ATOM   2286 CA   CA   . THR THR THR A A 293 293 . 76.246  17.883 37.730 1.00 46.38  1 . C  ?  
ATOM   2287 C    C    . THR THR THR A A 293 293 . 76.418  18.254 39.199 1.00 45.02  1 . C  ?  
ATOM   2288 O    O    . THR THR THR A A 293 293 . 77.422  17.893 39.826 1.00 43.54  1 . O  ?  
ATOM   2289 CB   CB   . THR THR THR A A 293 293 . 76.559  19.081 36.837 1.00 41.78  1 . C  ?  
ATOM   2290 OG1  OG1  . THR THR THR A A 293 293 . 76.746  18.633 35.489 1.00 51.57  1 . O  ?  
ATOM   2291 CG2  CG2  . THR THR THR A A 293 293 . 77.810  19.807 37.320 1.00 43.04  1 . C  ?  
ATOM   2292 N    N    . ILE ILE ILE A A 294 294 . 75.448  18.974 39.771 1.00 40.54  1 . N  ?  
ATOM   2293 CA   CA   . ILE ILE ILE A A 294 294 . 75.580  19.380 41.170 1.00 43.53  1 . C  ?  
ATOM   2294 C    C    . ILE ILE ILE A A 294 294 . 75.758  18.151 42.059 1.00 48.78  1 . C  ?  
ATOM   2295 O    O    . ILE ILE ILE A A 294 294 . 76.688  18.082 42.875 1.00 48.73  1 . O  ?  
ATOM   2296 CB   CB   . ILE ILE ILE A A 294 294 . 74.375  20.240 41.604 1.00 43.40  1 . C  ?  
ATOM   2297 CG1  CG1  . ILE ILE ILE A A 294 294 . 74.313  21.530 40.769 1.00 47.66  1 . C  ?  
ATOM   2298 CG2  CG2  . ILE ILE ILE A A 294 294 . 74.467  20.567 43.089 1.00 39.26  1 . C  ?  
ATOM   2299 CD1  CD1  . ILE ILE ILE A A 294 294 . 73.120  22.461 41.060 1.00 40.47  1 . C  ?  
ATOM   2300 N    N    . SER SER SER A A 295 295 . 74.873  17.155 41.898 1.00 46.72  1 . N  ?  
ATOM   2301 CA   CA   . SER SER SER A A 295 295 . 75.018  15.859 42.560 1.00 46.92  1 . C  ?  
ATOM   2302 C    C    . SER SER SER A A 295 295 . 76.434  15.326 42.443 1.00 47.30  1 . C  ?  
ATOM   2303 O    O    . SER SER SER A A 295 295 . 77.114  15.088 43.448 1.00 47.32  1 . O  ?  
ATOM   2304 CB   CB   . SER SER SER A A 295 295 . 74.061  14.836 41.945 1.00 44.76  1 . C  ?  
ATOM   2305 OG   OG   . SER SER SER A A 295 295 . 72.726  15.265 42.036 1.00 51.88  1 . O  ?  
ATOM   2306 N    N    . MET MET MET A A 296 296 . 76.874  15.099 41.205 1.00 45.07  1 . N  ?  
ATOM   2307 CA   CA   . MET MET MET A A 296 296 . 78.166  14.468 40.979 1.00 46.19  1 . C  ?  
ATOM   2308 C    C    . MET MET MET A A 296 296 . 79.297  15.268 41.618 1.00 54.80  1 . C  ?  
ATOM   2309 O    O    . MET MET MET A A 296 296 . 80.128  14.707 42.348 1.00 53.66  1 . O  ?  
ATOM   2310 CB   CB   . MET MET MET A A 296 296 . 78.406  14.293 39.486 1.00 40.56  1 . C  ?  
ATOM   2311 CG   CG   . MET MET MET A A 296 296 . 79.195  13.059 39.203 1.00 61.28  1 . C  ?  
ATOM   2312 SD   SD   . MET MET MET A A 296 296 . 78.189  11.601 39.554 1.00 59.86  1 . S  ?  
ATOM   2313 CE   CE   . MET MET MET A A 296 296 . 77.203  11.609 38.065 1.00 62.65  1 . C  ?  
ATOM   2314 O    O    . ILE ILE ILE A A 297 297 . 81.398  17.547 44.095 1.00 47.84  1 . O  ?  
ATOM   2315 N    N    . ILE ILE ILE A A 297 297 . 79.351  16.585 41.361 1.00 47.51  1 . N  ?  
ATOM   2316 CA   CA   . ILE ILE ILE A A 297 297 . 80.468  17.350 41.905 1.00 46.84  1 . C  ?  
ATOM   2317 C    C    . ILE ILE ILE A A 297 297 . 80.379  17.386 43.418 1.00 47.85  1 . C  ?  
ATOM   2318 CB   CB   . ILE ILE ILE A A 297 297 . 80.560  18.780 41.316 1.00 48.27  1 . C  ?  
ATOM   2319 CG1  CG1  . ILE ILE ILE A A 297 297 . 81.963  19.348 41.540 1.00 46.61  1 . C  ?  
ATOM   2320 CG2  CG2  . ILE ILE ILE A A 297 297 . 79.546  19.732 41.945 1.00 40.31  1 . C  ?  
ATOM   2321 CD1  CD1  . ILE ILE ILE A A 297 297 . 83.038  18.602 40.798 1.00 46.95  1 . C  ?  
ATOM   2322 N    N    . SER SER SER A A 298 298 . 79.182  17.221 43.976 1.00 47.19  1 . N  ?  
ATOM   2323 CA   CA   . SER SER SER A A 298 298 . 79.100  17.109 45.424 1.00 53.10  1 . C  ?  
ATOM   2324 C    C    . SER SER SER A A 298 298 . 79.762  15.828 45.910 1.00 51.34  1 . C  ?  
ATOM   2325 O    O    . SER SER SER A A 298 298 . 80.285  15.793 47.028 1.00 50.56  1 . O  ?  
ATOM   2326 CB   CB   . SER SER SER A A 298 298 . 77.643  17.164 45.886 1.00 55.90  1 . C  ?  
ATOM   2327 OG   OG   . SER SER SER A A 298 298 . 77.564  17.010 47.294 1.00 60.85  1 . O  ?  
ATOM   2328 N    N    . ILE ILE ILE A A 299 299 . 79.732  14.770 45.093 1.00 51.53  1 . N  ?  
ATOM   2329 CA   CA   . ILE ILE ILE A A 299 299 . 80.409  13.524 45.444 1.00 55.13  1 . C  ?  
ATOM   2330 C    C    . ILE ILE ILE A A 299 299 . 81.923  13.727 45.444 1.00 55.27  1 . C  ?  
ATOM   2331 O    O    . ILE ILE ILE A A 299 299 . 82.609  13.434 46.432 1.00 53.51  1 . O  ?  
ATOM   2332 CB   CB   . ILE ILE ILE A A 299 299 . 79.987  12.402 44.481 1.00 51.85  1 . C  ?  
ATOM   2333 CG1  CG1  . ILE ILE ILE A A 299 299 . 78.514  12.068 44.676 1.00 57.66  1 . C  ?  
ATOM   2334 CG2  CG2  . ILE ILE ILE A A 299 299 . 80.824  11.142 44.708 1.00 56.66  1 . C  ?  
ATOM   2335 CD1  CD1  . ILE ILE ILE A A 299 299 . 78.229  11.430 46.015 1.00 59.68  1 . C  ?  
ATOM   2336 N    N    . VAL VAL VAL A A 300 300 . 82.458  14.262 44.346 1.00 49.99  1 . N  ?  
ATOM   2337 CA   CA   . VAL VAL VAL A A 300 300 . 83.883  14.564 44.282 1.00 53.57  1 . C  ?  
ATOM   2338 C    C    . VAL VAL VAL A A 300 300 . 84.319  15.401 45.480 1.00 54.05  1 . C  ?  
ATOM   2339 O    O    . VAL VAL VAL A A 300 300 . 85.421  15.222 46.010 1.00 58.69  1 . O  ?  
ATOM   2340 CB   CB   . VAL VAL VAL A A 300 300 . 84.211  15.254 42.946 1.00 52.67  1 . C  ?  
ATOM   2341 CG1  CG1  . VAL VAL VAL A A 300 300 . 85.699  15.514 42.831 1.00 48.67  1 . C  ?  
ATOM   2342 CG2  CG2  . VAL VAL VAL A A 300 300 . 83.719  14.391 41.789 1.00 51.07  1 . C  ?  
ATOM   2343 N    N    . ASP ASP ASP A A 301 301 . 83.465  16.319 45.938 1.00 53.57  1 . N  ?  
ATOM   2344 CA   CA   . ASP ASP ASP A A 301 301 . 83.853  17.148 47.079 1.00 59.42  1 . C  ?  
ATOM   2345 C    C    . ASP ASP ASP A A 301 301 . 83.965  16.319 48.354 1.00 60.14  1 . C  ?  
ATOM   2346 O    O    . ASP ASP ASP A A 301 301 . 84.923  16.477 49.121 1.00 62.04  1 . O  ?  
ATOM   2347 CB   CB   . ASP ASP ASP A A 301 301 . 82.863  18.302 47.274 1.00 58.18  1 . C  ?  
ATOM   2348 CG   CG   . ASP ASP ASP A A 301 301 . 83.305  19.274 48.364 1.00 60.15  1 . C  ?  
ATOM   2349 OD2  OD2  . ASP ASP ASP A A 301 301 . 82.487  19.607 49.248 1.00 68.03  1 . O  ?  
ATOM   2350 OD1  OD1  . ASP ASP ASP A A 301 301 . 84.476  19.700 48.350 1.00 65.60  1 . O  ?  
ATOM   2351 N    N    . ASP ASP ASP A A 302 302 . 82.998  15.431 48.600 1.00 60.94  1 . N  ?  
ATOM   2352 CA   CA   . ASP ASP ASP A A 302 302 . 83.046  14.607 49.805 1.00 60.52  1 . C  ?  
ATOM   2353 C    C    . ASP ASP ASP A A 302 302 . 84.247  13.659 49.799 1.00 63.45  1 . C  ?  
ATOM   2354 O    O    . ASP ASP ASP A A 302 302 . 84.834  13.391 50.856 1.00 62.80  1 . O  ?  
ATOM   2355 CB   CB   . ASP ASP ASP A A 302 302 . 81.731  13.840 49.946 1.00 63.32  1 . C  ?  
ATOM   2356 CG   CG   . ASP ASP ASP A A 302 302 . 80.545  14.760 50.265 1.00 67.71  1 . C  ?  
ATOM   2357 OD1  OD1  . ASP ASP ASP A A 302 302 . 80.774  15.805 50.922 1.00 65.60  1 . O  ?  
ATOM   2358 OD2  OD2  . ASP ASP ASP A A 302 302 . 79.394  14.439 49.862 1.00 66.34  1 . O  ?  
ATOM   2359 N    N    . THR THR THR A A 303 303 . 84.631  13.163 48.618 1.00 57.42  1 . N  ?  
ATOM   2360 CA   CA   . THR THR THR A A 303 303 . 85.798  12.295 48.485 1.00 57.93  1 . C  ?  
ATOM   2361 C    C    . THR THR THR A A 303 303 . 87.086  13.010 48.889 1.00 66.85  1 . C  ?  
ATOM   2362 O    O    . THR THR THR A A 303 303 . 87.883  12.482 49.675 1.00 67.48  1 . O  ?  
ATOM   2363 CB   CB   . THR THR THR A A 303 303 . 85.905  11.811 47.045 1.00 57.99  1 . C  ?  
ATOM   2364 OG1  OG1  . THR THR THR A A 303 303 . 84.600  11.489 46.552 1.00 55.87  1 . O  ?  
ATOM   2365 CG2  CG2  . THR THR THR A A 303 303 . 86.807  10.594 46.959 1.00 60.59  1 . C  ?  
ATOM   2366 N    N    . PHE PHE PHE A A 304 304 . 87.327  14.204 48.331 1.00 62.32  1 . N  ?  
ATOM   2367 CA   CA   . PHE PHE PHE A A 304 304 . 88.521  14.961 48.693 1.00 52.10  1 . C  ?  
ATOM   2368 C    C    . PHE PHE PHE A A 304 304 . 88.496  15.401 50.145 1.00 58.18  1 . C  ?  
ATOM   2369 O    O    . PHE PHE PHE A A 304 304 . 89.554  15.573 50.758 1.00 66.14  1 . O  ?  
ATOM   2370 CB   CB   . PHE PHE PHE A A 304 304 . 88.651  16.194 47.815 1.00 50.34  1 . C  ?  
ATOM   2371 CG   CG   . PHE PHE PHE A A 304 304 . 89.278  15.938 46.490 1.00 49.63  1 . C  ?  
ATOM   2372 CD2  CD2  . PHE PHE PHE A A 304 304 . 90.632  16.163 46.301 1.00 49.61  1 . C  ?  
ATOM   2373 CD1  CD1  . PHE PHE PHE A A 304 304 . 88.519  15.503 45.423 1.00 47.78  1 . C  ?  
ATOM   2374 CE2  CE2  . PHE PHE PHE A A 304 304 . 91.214  15.937 45.072 1.00 49.68  1 . C  ?  
ATOM   2375 CE1  CE1  . PHE PHE PHE A A 304 304 . 89.091  15.279 44.190 1.00 46.44  1 . C  ?  
ATOM   2376 CZ   CZ   . PHE PHE PHE A A 304 304 . 90.436  15.498 44.010 1.00 49.58  1 . C  ?  
ATOM   2377 N    N    . ASP ASP ASP A A 305 305 . 87.311  15.603 50.706 1.00 63.14  1 . N  ?  
ATOM   2378 CA   CA   . ASP ASP ASP A A 305 305 . 87.174  16.360 51.942 1.00 68.07  1 . C  ?  
ATOM   2379 C    C    . ASP ASP ASP A A 305 305 . 87.190  15.477 53.179 1.00 72.22  1 . C  ?  
ATOM   2380 O    O    . ASP ASP ASP A A 305 305 . 87.740  15.870 54.214 1.00 74.12  1 . O  ?  
ATOM   2381 CB   CB   . ASP ASP ASP A A 305 305 . 85.878  17.177 51.900 1.00 68.32  1 . C  ?  
ATOM   2382 CG   CG   . ASP ASP ASP A A 305 305 . 85.904  18.373 52.841 1.00 81.20  1 . C  ?  
ATOM   2383 OD1  OD1  . ASP ASP ASP A A 305 305 . 86.490  18.269 53.941 1.00 82.85  1 . O  ?  
ATOM   2384 OD2  OD2  . ASP ASP ASP A A 305 305 . 85.327  19.423 52.472 1.00 87.00  1 . O  ?  
ATOM   2385 O    O    . ALA ALA ALA A A 306 306 . 85.946  11.155 54.697 1.00 77.31  1 . O  ?  
ATOM   2386 N    N    . ALA ALA ALA A A 306 306 . 86.591  14.286 53.093 1.00 73.68  1 . N  ?  
ATOM   2387 CA   CA   . ALA ALA ALA A A 306 306 . 86.401  13.470 54.286 1.00 78.01  1 . C  ?  
ATOM   2388 C    C    . ALA ALA ALA A A 306 306 . 86.557  11.977 54.005 1.00 78.30  1 . C  ?  
ATOM   2389 CB   CB   . ALA ALA ALA A A 306 306 . 85.020  13.735 54.902 1.00 81.57  1 . C  ?  
ATOM   2390 O    O    . TYR TYR TYR A A 307 307 . 89.678  9.145  52.706 1.00 78.10  1 . O  ?  
ATOM   2391 N    N    . TYR TYR TYR A A 307 307 . 87.356  11.601 53.007 1.00 73.47  1 . N  ?  
ATOM   2392 CA   CA   . TYR TYR TYR A A 307 307 . 87.510  10.177 52.744 1.00 75.02  1 . C  ?  
ATOM   2393 C    C    . TYR TYR TYR A A 307 307 . 88.847  9.825  52.093 1.00 75.66  1 . C  ?  
ATOM   2394 CB   CB   . TYR TYR TYR A A 307 307 . 86.352  9.672  51.880 1.00 68.12  1 . C  ?  
ATOM   2395 CG   CG   . TYR TYR TYR A A 307 307 . 86.267  8.164  51.872 1.00 76.42  1 . C  ?  
ATOM   2396 CD1  CD1  . TYR TYR TYR A A 307 307 . 85.851  7.467  53.005 1.00 77.18  1 . C  ?  
ATOM   2397 CD2  CD2  . TYR TYR TYR A A 307 307 . 86.632  7.429  50.745 1.00 75.49  1 . C  ?  
ATOM   2398 CE1  CE1  . TYR TYR TYR A A 307 307 . 85.787  6.086  53.010 1.00 78.15  1 . C  ?  
ATOM   2399 CE2  CE2  . TYR TYR TYR A A 307 307 . 86.572  6.046  50.744 1.00 76.70  1 . C  ?  
ATOM   2400 CZ   CZ   . TYR TYR TYR A A 307 307 . 86.150  5.380  51.880 1.00 79.32  1 . C  ?  
ATOM   2401 OH   OH   . TYR TYR TYR A A 307 307 . 86.088  4.004  51.885 1.00 86.00  1 . O  ?  
ATOM   2402 O    O    . GLY GLY GLY A A 308 308 . 91.532  11.113 51.764 1.00 69.92  1 . O  ?  
ATOM   2403 N    N    . GLY GLY GLY A A 308 308 . 89.056  10.264 50.855 1.00 71.82  1 . N  ?  
ATOM   2404 CA   CA   . GLY GLY GLY A A 308 308 . 90.252  9.887  50.128 1.00 70.58  1 . C  ?  
ATOM   2405 C    C    . GLY GLY GLY A A 308 308 . 91.525  10.283 50.851 1.00 72.44  1 . C  ?  
ATOM   2406 O    O    . THR THR THR A A 309 309 . 94.531  10.577 48.678 1.00 69.92  1 . O  ?  
ATOM   2407 N    N    . THR THR THR A A 309 309 . 92.623  9.653  50.423 1.00 71.39  1 . N  ?  
ATOM   2408 CA   CA   . THR THR THR A A 309 309 . 93.977  9.884  50.918 1.00 70.96  1 . C  ?  
ATOM   2409 C    C    . THR THR THR A A 309 309 . 94.801  10.642 49.883 1.00 69.42  1 . C  ?  
ATOM   2410 CB   CB   . THR THR THR A A 309 309 . 94.689  8.561  51.231 1.00 70.55  1 . C  ?  
ATOM   2411 OG1  OG1  . THR THR THR A A 309 309 . 94.728  7.758  50.039 1.00 65.92  1 . O  ?  
ATOM   2412 CG2  CG2  . THR THR THR A A 309 309 . 93.978  7.807  52.358 1.00 72.09  1 . C  ?  
ATOM   2413 O    O    . VAL VAL VAL A A 310 310 . 96.651  11.902 47.107 1.00 65.60  1 . O  ?  
ATOM   2414 N    N    . VAL VAL VAL A A 310 310 . 95.835  11.341 50.363 1.00 65.43  1 . N  ?  
ATOM   2415 CA   CA   . VAL VAL VAL A A 310 310 . 96.702  12.141 49.500 1.00 64.23  1 . C  ?  
ATOM   2416 C    C    . VAL VAL VAL A A 310 310 . 96.981  11.405 48.193 1.00 68.40  1 . C  ?  
ATOM   2417 CB   CB   . VAL VAL VAL A A 310 310 . 98.025  12.496 50.205 1.00 65.77  1 . C  ?  
ATOM   2418 CG1  CG1  . VAL VAL VAL A A 310 310 . 99.050  12.959 49.183 1.00 59.03  1 . C  ?  
ATOM   2419 CG2  CG2  . VAL VAL VAL A A 310 310 . 97.804  13.552 51.271 1.00 61.17  1 . C  ?  
ATOM   2420 O    O    . LYS LYS LYS A A 311 311 . 96.785  9.352  44.986 1.00 69.71  1 . O  ?  
ATOM   2421 N    N    . LYS LYS LYS A A 311 311 . 97.580  10.209 48.292 1.00 66.49  1 . N  ?  
ATOM   2422 CA   CA   . LYS LYS LYS A A 311 311 . 97.942  9.460  47.091 1.00 69.27  1 . C  ?  
ATOM   2423 C    C    . LYS LYS LYS A A 311 311 . 96.725  9.184  46.213 1.00 68.71  1 . C  ?  
ATOM   2424 CB   CB   . LYS LYS LYS A A 311 311 . 98.632  8.150  47.472 1.00 74.72  1 . C  ?  
ATOM   2425 CG   CG   . LYS LYS LYS A A 311 311 . 99.924  8.313  48.249 1.00 75.43  1 . C  ?  
ATOM   2426 CD   CD   . LYS LYS LYS A A 311 311 . 100.565 6.951  48.546 1.00 84.95  1 . C  ?  
ATOM   2427 CE   CE   . LYS LYS LYS A A 311 311 . 100.914 6.185  47.263 1.00 89.67  1 . C  ?  
ATOM   2428 NZ   NZ   . LYS LYS LYS A A 311 311 . 101.793 4.997  47.509 1.00 82.12  1 . N  ?  
ATOM   2429 O    O    . GLU GLU GLU A A 312 312 . 93.686  9.769  44.104 1.00 60.93  1 . O  ?  
ATOM   2430 N    N    . GLU GLU GLU A A 312 312 . 95.613  8.752  46.816 1.00 63.40  1 . N  ?  
ATOM   2431 CA   CA   . GLU GLU GLU A A 312 312 . 94.403  8.512  46.034 1.00 68.57  1 . C  ?  
ATOM   2432 C    C    . GLU GLU GLU A A 312 312 . 93.940  9.780  45.317 1.00 62.73  1 . C  ?  
ATOM   2433 CB   CB   . GLU GLU GLU A A 312 312 . 93.295  7.976  46.937 1.00 72.64  1 . C  ?  
ATOM   2434 CG   CG   . GLU GLU GLU A A 312 312 . 93.436  6.527  47.319 1.00 65.26  1 . C  ?  
ATOM   2435 CD   CD   . GLU GLU GLU A A 312 312 . 92.432  6.121  48.377 1.00 77.33  1 . C  ?  
ATOM   2436 OE1  OE1  . GLU GLU GLU A A 312 312 . 92.318  6.841  49.394 1.00 73.84  1 . O  ?  
ATOM   2437 OE2  OE2  . GLU GLU GLU A A 312 312 . 91.747  5.087  48.190 1.00 82.37  1 . O  ?  
ATOM   2438 O    O    . LEU LEU LEU A A 313 313 . 93.579  13.145 43.317 1.00 52.10  1 . O  ?  
ATOM   2439 N    N    . LEU LEU LEU A A 313 313 . 93.818  10.888 46.057 1.00 61.85  1 . N  ?  
ATOM   2440 CA   CA   . LEU LEU LEU A A 313 313 . 93.285  12.114 45.460 1.00 61.96  1 . C  ?  
ATOM   2441 C    C    . LEU LEU LEU A A 313 313 . 94.120  12.564 44.269 1.00 60.71  1 . C  ?  
ATOM   2442 CB   CB   . LEU LEU LEU A A 313 313 . 93.198  13.217 46.512 1.00 52.37  1 . C  ?  
ATOM   2443 CG   CG   . LEU LEU LEU A A 313 313 . 92.408  12.802 47.753 1.00 58.73  1 . C  ?  
ATOM   2444 CD1  CD1  . LEU LEU LEU A A 313 313 . 92.565  13.791 48.891 1.00 56.65  1 . C  ?  
ATOM   2445 CD2  CD2  . LEU LEU LEU A A 313 313 . 90.947  12.583 47.405 1.00 52.24  1 . C  ?  
ATOM   2446 O    O    . GLU GLU GLU A A 314 314 . 95.875  12.346 40.807 1.00 61.37  1 . O  ?  
ATOM   2447 N    N    . GLU GLU GLU A A 314 314 . 95.429  12.273 44.285 1.00 61.46  1 . N  ?  
ATOM   2448 CA   CA   . GLU GLU GLU A A 314 314 . 96.278  12.643 43.158 1.00 60.96  1 . C  ?  
ATOM   2449 C    C    . GLU GLU GLU A A 314 314 . 95.949  11.811 41.922 1.00 61.94  1 . C  ?  
ATOM   2450 CB   CB   . GLU GLU GLU A A 314 314 . 97.751  12.499 43.539 1.00 62.83  1 . C  ?  
ATOM   2451 CG   CG   . GLU GLU GLU A A 314 314 . 98.707  13.212 42.594 1.00 66.26  1 . C  ?  
ATOM   2452 CD   CD   . GLU GLU GLU A A 314 314 . 99.115  14.591 43.104 1.00 75.69  1 . C  ?  
ATOM   2453 OE1  OE1  . GLU GLU GLU A A 314 314 . 99.045  14.809 44.335 1.00 71.81  1 . O  ?  
ATOM   2454 OE2  OE2  . GLU GLU GLU A A 314 314 . 99.504  15.457 42.282 1.00 75.23  1 . O  ?  
ATOM   2455 O    O    . ALA ALA ALA A A 315 315 . 93.777  10.061 39.185 1.00 60.60  1 . O  ?  
ATOM   2456 N    N    . ALA ALA ALA A A 315 315 . 95.743  10.502 42.094 1.00 61.54  1 . N  ?  
ATOM   2457 CA   CA   . ALA ALA ALA A A 315 315 . 95.373  9.672  40.951 1.00 63.22  1 . C  ?  
ATOM   2458 C    C    . ALA ALA ALA A A 315 315 . 94.007  10.078 40.405 1.00 62.21  1 . C  ?  
ATOM   2459 CB   CB   . ALA ALA ALA A A 315 315 . 95.390  8.195  41.348 1.00 55.98  1 . C  ?  
ATOM   2460 O    O    . TYR TYR TYR A A 316 316 . 91.516  12.347 38.855 1.00 55.97  1 . O  ?  
ATOM   2461 N    N    . TYR TYR TYR A A 316 316 . 93.083  10.446 41.293 1.00 58.56  1 . N  ?  
ATOM   2462 CA   CA   . TYR TYR TYR A A 316 316 . 91.816  11.009 40.841 1.00 59.67  1 . C  ?  
ATOM   2463 C    C    . TYR TYR TYR A A 316 316 . 92.038  12.254 39.977 1.00 59.33  1 . C  ?  
ATOM   2464 CB   CB   . TYR TYR TYR A A 316 316 . 90.942  11.326 42.050 1.00 58.75  1 . C  ?  
ATOM   2465 CG   CG   . TYR TYR TYR A A 316 316 . 89.467  11.285 41.747 1.00 64.46  1 . C  ?  
ATOM   2466 CD2  CD2  . TYR TYR TYR A A 316 316 . 88.743  10.112 41.927 1.00 65.41  1 . C  ?  
ATOM   2467 CD1  CD1  . TYR TYR TYR A A 316 316 . 88.791  12.416 41.281 1.00 61.65  1 . C  ?  
ATOM   2468 CE2  CE2  . TYR TYR TYR A A 316 316 . 87.388  10.055 41.652 1.00 66.02  1 . C  ?  
ATOM   2469 CE1  CE1  . TYR TYR TYR A A 316 316 . 87.431  12.371 41.005 1.00 59.67  1 . C  ?  
ATOM   2470 CZ   CZ   . TYR TYR TYR A A 316 316 . 86.735  11.186 41.195 1.00 65.22  1 . C  ?  
ATOM   2471 OH   OH   . TYR TYR TYR A A 316 316 . 85.388  11.111 40.925 1.00 61.62  1 . O  ?  
ATOM   2472 O    O    . THR THR THR A A 317 317 . 93.124  14.666 37.330 1.00 57.56  1 . O  ?  
ATOM   2473 N    N    . THR THR THR A A 317 317 . 92.825  13.220 40.477 1.00 53.14  1 . N  ?  
ATOM   2474 CA   CA   . THR THR THR A A 317 317 . 93.028  14.461 39.728 1.00 54.46  1 . C  ?  
ATOM   2475 C    C    . THR THR THR A A 317 317 . 93.629  14.177 38.353 1.00 62.56  1 . C  ?  
ATOM   2476 CB   CB   . THR THR THR A A 317 317 . 93.919  15.436 40.509 1.00 54.53  1 . C  ?  
ATOM   2477 OG1  OG1  . THR THR THR A A 317 317 . 93.355  15.726 41.799 1.00 53.33  1 . O  ?  
ATOM   2478 CG2  CG2  . THR THR THR A A 317 317 . 94.089  16.745 39.728 1.00 48.66  1 . C  ?  
ATOM   2479 O    O    . ASP ASP ASP A A 318 318 . 94.228  12.664 34.926 1.00 58.57  1 . O  ?  
ATOM   2480 N    N    . ASP ASP ASP A A 318 318 . 94.712  13.381 38.313 1.00 59.73  1 . N  ?  
ATOM   2481 CA   CA   . ASP ASP ASP A A 318 318 . 95.323  12.995 37.043 1.00 56.60  1 . C  ?  
ATOM   2482 C    C    . ASP ASP ASP A A 318 318 . 94.312  12.331 36.116 1.00 58.47  1 . C  ?  
ATOM   2483 CB   CB   . ASP ASP ASP A A 318 318 . 96.505  12.060 37.296 1.00 65.83  1 . C  ?  
ATOM   2484 CG   CG   . ASP ASP ASP A A 318 318 . 97.717  12.784 37.850 1.00 77.21  1 . C  ?  
ATOM   2485 OD1  OD1  . ASP ASP ASP A A 318 318 . 98.074  13.858 37.310 1.00 85.41  1 . O  ?  
ATOM   2486 OD2  OD2  . ASP ASP ASP A A 318 318 . 98.308  12.282 38.836 1.00 81.67  1 . O  ?  
ATOM   2487 O    O    . ALA ALA ALA A A 319 319 . 91.183  11.682 34.070 1.00 58.34  1 . O  ?  
ATOM   2488 N    N    . ALA ALA ALA A A 319 319 . 93.537  11.381 36.643 1.00 57.54  1 . N  ?  
ATOM   2489 CA   CA   . ALA ALA ALA A A 319 319 . 92.508  10.728 35.837 1.00 60.09  1 . C  ?  
ATOM   2490 C    C    . ALA ALA ALA A A 319 319 . 91.528  11.745 35.259 1.00 60.65  1 . C  ?  
ATOM   2491 CB   CB   . ALA ALA ALA A A 319 319 . 91.780  9.688  36.680 1.00 59.74  1 . C  ?  
ATOM   2492 O    O    . ILE ILE ILE A A 320 320 . 90.265  14.844 33.455 1.00 52.00  1 . O  ?  
ATOM   2493 N    N    . ILE ILE ILE A A 320 320 . 91.072  12.698 36.083 1.00 57.56  1 . N  ?  
ATOM   2494 CA   CA   . ILE ILE ILE A A 320 320 . 90.160  13.733 35.589 1.00 59.91  1 . C  ?  
ATOM   2495 C    C    . ILE ILE ILE A A 320 320 . 90.841  14.575 34.516 1.00 53.52  1 . C  ?  
ATOM   2496 CB   CB   . ILE ILE ILE A A 320 320 . 89.645  14.612 36.745 1.00 58.88  1 . C  ?  
ATOM   2497 CG1  CG1  . ILE ILE ILE A A 320 320 . 88.893  13.776 37.792 1.00 58.26  1 . C  ?  
ATOM   2498 CG2  CG2  . ILE ILE ILE A A 320 320 . 88.736  15.712 36.202 1.00 54.54  1 . C  ?  
ATOM   2499 CD1  CD1  . ILE ILE ILE A A 320 320 . 87.573  13.238 37.306 1.00 54.68  1 . C  ?  
ATOM   2500 O    O    . GLN GLN GLN A A 321 321 . 92.667  15.566 31.366 1.00 56.81  1 . O  ?  
ATOM   2501 N    N    . GLN GLN GLN A A 321 321 . 92.079  15.007 34.776 1.00 53.14  1 . N  ?  
ATOM   2502 CA   CA   . GLN GLN GLN A A 321 321 . 92.810  15.760 33.760 1.00 55.64  1 . C  ?  
ATOM   2503 C    C    . GLN GLN GLN A A 321 321 . 92.877  14.990 32.444 1.00 60.69  1 . C  ?  
ATOM   2504 CB   CB   . GLN GLN GLN A A 321 321 . 94.215  16.094 34.255 1.00 54.79  1 . C  ?  
ATOM   2505 CG   CG   . GLN GLN GLN A A 321 321 . 94.256  16.831 35.584 1.00 56.35  1 . C  ?  
ATOM   2506 CD   CD   . GLN GLN GLN A A 321 321 . 93.250  17.966 35.646 1.00 56.33  1 . C  ?  
ATOM   2507 OE1  OE1  . GLN GLN GLN A A 321 321 . 93.183  18.807 34.747 1.00 52.34  1 . O  ?  
ATOM   2508 NE2  NE2  . GLN GLN GLN A A 321 321 . 92.440  17.973 36.700 1.00 53.90  1 . N  ?  
ATOM   2509 O    O    . ARG ARG ARG A A 322 322 . 91.852  12.693 29.405 1.00 66.02  1 . O  ?  
ATOM   2510 N    N    . ARG ARG ARG A A 322 322 . 93.151  13.678 32.517 1.00 63.63  1 . N  ?  
ATOM   2511 CA   CA   . ARG ARG ARG A A 322 322 . 93.309  12.872 31.308 1.00 63.70  1 . C  ?  
ATOM   2512 C    C    . ARG ARG ARG A A 322 322 . 91.966  12.601 30.635 1.00 64.63  1 . C  ?  
ATOM   2513 CB   CB   . ARG ARG ARG A A 322 322 . 94.030  11.567 31.648 1.00 72.97  1 . C  ?  
ATOM   2514 CG   CG   . ARG ARG ARG A A 322 322 . 95.485  11.523 31.210 1.00 74.19  1 . C  ?  
ATOM   2515 CD   CD   . ARG ARG ARG A A 322 322 . 95.731  10.329 30.287 1.00 91.96  1 . C  ?  
ATOM   2516 NE   NE   . ARG ARG ARG A A 322 322 . 96.523  9.268  30.919 1.00 103.90 1 . N  ?  
ATOM   2517 CZ   CZ   . ARG ARG ARG A A 322 322 . 96.592  8.013  30.470 1.00 106.08 1 . C  ?  
ATOM   2518 NH1  NH1  . ARG ARG ARG A A 322 322 . 95.893  7.654  29.397 1.00 104.59 1 . N  ?  
ATOM   2519 NH2  NH2  . ARG ARG ARG A A 322 322 . 97.330  7.104  31.106 1.00 106.68 1 . N  ?  
ATOM   2520 O    O    . TRP TRP TRP A A 323 323 . 89.156  11.469 28.653 1.00 66.01  1 . O  ?  
ATOM   2521 N    N    . TRP TRP TRP A A 323 323 . 90.939  12.266 31.421 1.00 62.59  1 . N  ?  
ATOM   2522 CA   CA   . TRP TRP TRP A A 323 323 . 89.561  12.186 30.934 1.00 62.93  1 . C  ?  
ATOM   2523 C    C    . TRP TRP TRP A A 323 323 . 89.451  11.158 29.809 1.00 66.20  1 . C  ?  
ATOM   2524 CB   CB   . TRP TRP TRP A A 323 323 . 89.059  13.558 30.465 1.00 62.08  1 . C  ?  
ATOM   2525 CG   CG   . TRP TRP TRP A A 323 323 . 87.559  13.637 30.350 1.00 65.54  1 . C  ?  
ATOM   2526 CD1  CD1  . TRP TRP TRP A A 323 323 . 86.795  13.298 29.267 1.00 62.04  1 . C  ?  
ATOM   2527 CD2  CD2  . TRP TRP TRP A A 323 323 . 86.645  14.084 31.361 1.00 63.19  1 . C  ?  
ATOM   2528 NE1  NE1  . TRP TRP TRP A A 323 323 . 85.466  13.499 29.543 1.00 61.53  1 . N  ?  
ATOM   2529 CE2  CE2  . TRP TRP TRP A A 323 323 . 85.347  13.989 30.820 1.00 64.14  1 . C  ?  
ATOM   2530 CE3  CE3  . TRP TRP TRP A A 323 323 . 86.800  14.560 32.669 1.00 61.26  1 . C  ?  
ATOM   2531 CZ2  CZ2  . TRP TRP TRP A A 323 323 . 84.209  14.355 31.542 1.00 59.88  1 . C  ?  
ATOM   2532 CZ3  CZ3  . TRP TRP TRP A A 323 323 . 85.674  14.912 33.382 1.00 61.29  1 . C  ?  
ATOM   2533 CH2  CH2  . TRP TRP TRP A A 323 323 . 84.392  14.805 32.818 1.00 57.60  1 . C  ?  
ATOM   2534 O    O    . ASP ASP ASP A A 324 324 . 89.982  7.303  31.151 1.00 73.16  1 . O  ?  
ATOM   2535 N    N    . ASP ASP ASP A A 324 324 . 89.706  9.913  30.203 1.00 73.97  1 . N  ?  
ATOM   2536 CA   CA   . ASP ASP ASP A A 324 324 . 89.767  8.784  29.284 1.00 78.08  1 . C  ?  
ATOM   2537 C    C    . ASP ASP ASP A A 324 324 . 89.427  7.530  30.070 1.00 78.92  1 . C  ?  
ATOM   2538 CB   CB   . ASP ASP ASP A A 324 324 . 91.155  8.662  28.640 1.00 78.68  1 . C  ?  
ATOM   2539 CG   CG   . ASP ASP ASP A A 324 324 . 91.287  7.447  27.725 1.00 87.69  1 . C  ?  
ATOM   2540 OD1  OD1  . ASP ASP ASP A A 324 324 . 90.260  6.924  27.229 1.00 87.40  1 . O  ?  
ATOM   2541 OD2  OD2  . ASP ASP ASP A A 324 324 . 92.442  7.022  27.496 1.00 92.10  1 . O  ?  
ATOM   2542 N    N    . ILE ILE ILE A A 325 325 . 88.514  6.727  29.520 1.00 77.63  1 . N  ?  
ATOM   2543 CA   CA   . ILE ILE ILE A A 325 325 . 88.046  5.536  30.224 1.00 81.75  1 . C  ?  
ATOM   2544 C    C    . ILE ILE ILE A A 325 325 . 89.215  4.640  30.618 1.00 82.07  1 . C  ?  
ATOM   2545 O    O    . ILE ILE ILE A A 325 325 . 89.218  4.054  31.707 1.00 76.81  1 . O  ?  
ATOM   2546 CB   CB   . ILE ILE ILE A A 325 325 . 87.016  4.775  29.373 1.00 81.76  1 . C  ?  
ATOM   2547 CG1  CG1  . ILE ILE ILE A A 325 325 . 86.074  5.754  28.646 1.00 84.02  1 . C  ?  
ATOM   2548 CG2  CG2  . ILE ILE ILE A A 325 325 . 86.232  3.845  30.267 1.00 75.16  1 . C  ?  
ATOM   2549 CD1  CD1  . ILE ILE ILE A A 325 325 . 86.696  6.507  27.438 1.00 73.48  1 . C  ?  
ATOM   2550 N    N    . ASN ASN ASN A A 326 326 . 90.242  4.537  29.760 1.00 81.93  1 . N  ?  
ATOM   2551 CA   CA   . ASN ASN ASN A A 326 326 . 91.378  3.659  30.051 1.00 85.18  1 . C  ?  
ATOM   2552 C    C    . ASN ASN ASN A A 326 326 . 91.946  3.857  31.456 1.00 83.73  1 . C  ?  
ATOM   2553 O    O    . ASN ASN ASN A A 326 326 . 92.657  2.975  31.953 1.00 85.37  1 . O  ?  
ATOM   2554 CB   CB   . ASN ASN ASN A A 326 326 . 92.499  3.860  29.011 1.00 85.55  1 . C  ?  
ATOM   2555 CG   CG   . ASN ASN ASN A A 326 326 . 92.324  2.984  27.773 1.00 82.24  1 . C  ?  
ATOM   2556 OD1  OD1  . ASN ASN ASN A A 326 326 . 91.695  1.926  27.832 1.00 76.42  1 . O  ?  
ATOM   2557 ND2  ND2  . ASN ASN ASN A A 326 326 . 92.887  3.421  26.649 1.00 79.91  1 . N  ?  
ATOM   2558 N    N    . GLU GLU GLU A A 327 327 . 91.624  4.972  32.119 1.00 78.31  1 . N  ?  
ATOM   2559 CA   CA   . GLU GLU GLU A A 327 327 . 92.274  5.363  33.366 1.00 74.91  1 . C  ?  
ATOM   2560 C    C    . GLU GLU GLU A A 327 327 . 91.666  4.737  34.613 1.00 79.37  1 . C  ?  
ATOM   2561 O    O    . GLU GLU GLU A A 327 327 . 92.252  4.884  35.693 1.00 76.12  1 . O  ?  
ATOM   2562 CB   CB   . GLU GLU GLU A A 327 327 . 92.222  6.881  33.538 1.00 82.82  1 . C  ?  
ATOM   2563 CG   CG   . GLU GLU GLU A A 327 327 . 92.507  7.665  32.287 1.00 84.49  1 . C  ?  
ATOM   2564 CD   CD   . GLU GLU GLU A A 327 327 . 93.883  7.376  31.746 1.00 91.04  1 . C  ?  
ATOM   2565 OE1  OE1  . GLU GLU GLU A A 327 327 . 94.826  7.227  32.560 1.00 82.87  1 . O  ?  
ATOM   2566 OE2  OE2  . GLU GLU GLU A A 327 327 . 94.010  7.285  30.504 1.00 94.76  1 . O  ?  
ATOM   2567 N    N    . ILE ILE ILE A A 328 328 . 90.507  4.077  34.515 1.00 80.70  1 . N  ?  
ATOM   2568 CA   CA   . ILE ILE ILE A A 328 328 . 89.820  3.620  35.723 1.00 78.07  1 . C  ?  
ATOM   2569 C    C    . ILE ILE ILE A A 328 328 . 90.732  2.720  36.546 1.00 83.84  1 . C  ?  
ATOM   2570 O    O    . ILE ILE ILE A A 328 328 . 90.869  2.885  37.766 1.00 80.38  1 . O  ?  
ATOM   2571 CB   CB   . ILE ILE ILE A A 328 328 . 88.508  2.905  35.364 1.00 80.08  1 . C  ?  
ATOM   2572 CG1  CG1  . ILE ILE ILE A A 328 328 . 87.980  3.413  34.027 1.00 80.67  1 . C  ?  
ATOM   2573 CG2  CG2  . ILE ILE ILE A A 328 328 . 87.479  3.108  36.475 1.00 77.74  1 . C  ?  
ATOM   2574 CD1  CD1  . ILE ILE ILE A A 328 328 . 87.724  2.311  33.026 1.00 87.87  1 . C  ?  
ATOM   2575 N    N    . ASP ASP ASP A A 329 329 . 91.376  1.754  35.882 1.00 91.13  1 . N  ?  
ATOM   2576 CA   CA   . ASP ASP ASP A A 329 329 . 92.184  0.757  36.577 1.00 89.30  1 . C  ?  
ATOM   2577 C    C    . ASP ASP ASP A A 329 329 . 93.260  1.391  37.447 1.00 82.70  1 . C  ?  
ATOM   2578 O    O    . ASP ASP ASP A A 329 329 . 93.720  0.762  38.407 1.00 82.79  1 . O  ?  
ATOM   2579 CB   CB   . ASP ASP ASP A A 329 329 . 92.811  -0.194 35.556 1.00 85.93  1 . C  ?  
ATOM   2580 CG   CG   . ASP ASP ASP A A 329 329 . 91.847  -0.573 34.448 1.00 90.08  1 . C  ?  
ATOM   2581 OD1  OD1  . ASP ASP ASP A A 329 329 . 90.824  -1.222 34.753 1.00 87.42  1 . O  ?  
ATOM   2582 OD2  OD2  . ASP ASP ASP A A 329 329 . 92.105  -0.210 33.277 1.00 95.80  1 . O  ?  
ATOM   2583 N    N    . ARG ARG ARG A A 330 330 . 93.646  2.632  37.150 1.00 80.98  1 . N  ?  
ATOM   2584 CA   CA   . ARG ARG ARG A A 330 330 . 94.658  3.334  37.930 1.00 80.42  1 . C  ?  
ATOM   2585 C    C    . ARG ARG ARG A A 330 330 . 94.146  3.819  39.283 1.00 80.01  1 . C  ?  
ATOM   2586 O    O    . ARG ARG ARG A A 330 330 . 94.955  4.282  40.098 1.00 78.52  1 . O  ?  
ATOM   2587 CB   CB   . ARG ARG ARG A A 330 330 . 95.189  4.515  37.115 1.00 74.26  1 . C  ?  
ATOM   2588 CG   CG   . ARG ARG ARG A A 330 330 . 96.674  4.734  37.250 1.00 84.30  1 . C  ?  
ATOM   2589 CD   CD   . ARG ARG ARG A A 330 330 . 97.319  4.950  35.892 1.00 91.94  1 . C  ?  
ATOM   2590 NE   NE   . ARG ARG ARG A A 330 330 . 98.650  4.347  35.841 1.00 104.66 1 . N  ?  
ATOM   2591 CZ   CZ   . ARG ARG ARG A A 330 330 . 99.521  4.525  34.853 1.00 104.28 1 . C  ?  
ATOM   2592 NH1  NH1  . ARG ARG ARG A A 330 330 . 99.210  5.300  33.818 1.00 104.82 1 . N  ?  
ATOM   2593 NH2  NH2  . ARG ARG ARG A A 330 330 . 100.704 3.928  34.903 1.00 99.12  1 . N  ?  
ATOM   2594 N    N    . LEU LEU LEU A A 331 331 . 92.821  3.722  39.549 1.00 78.36  1 . N  ?  
ATOM   2595 CA   CA   . LEU LEU LEU A A 331 331 . 92.187  4.276  40.744 1.00 76.32  1 . C  ?  
ATOM   2596 C    C    . LEU LEU LEU A A 331 331 . 91.639  3.166  41.636 1.00 76.15  1 . C  ?  
ATOM   2597 O    O    . LEU LEU LEU A A 331 331 . 91.187  2.129  41.138 1.00 75.57  1 . O  ?  
ATOM   2598 CB   CB   . LEU LEU LEU A A 331 331 . 91.033  5.224  40.377 1.00 74.41  1 . C  ?  
ATOM   2599 CG   CG   . LEU LEU LEU A A 331 331 . 91.293  6.302  39.321 1.00 69.30  1 . C  ?  
ATOM   2600 CD1  CD1  . LEU LEU LEU A A 331 331 . 90.077  6.514  38.457 1.00 68.10  1 . C  ?  
ATOM   2601 CD2  CD2  . LEU LEU LEU A A 331 331 . 91.711  7.608  39.977 1.00 64.35  1 . C  ?  
ATOM   2602 O    O    . PRO PRO PRO A A 332 332 . 88.972  2.795  42.660 1.00 80.50  1 . O  ?  
ATOM   2603 N    N    . PRO PRO PRO A A 332 332 . 91.634  3.363  42.954 1.00 70.02  1 . N  ?  
ATOM   2604 CA   CA   . PRO PRO PRO A A 332 332 . 91.032  2.367  43.848 1.00 68.98  1 . C  ?  
ATOM   2605 C    C    . PRO PRO PRO A A 332 332 . 89.587  2.092  43.466 1.00 78.24  1 . C  ?  
ATOM   2606 CB   CB   . PRO PRO PRO A A 332 332 . 91.134  3.004  45.238 1.00 72.38  1 . C  ?  
ATOM   2607 CG   CG   . PRO PRO PRO A A 332 332 . 91.384  4.449  44.992 1.00 72.43  1 . C  ?  
ATOM   2608 CD   CD   . PRO PRO PRO A A 332 332 . 92.092  4.558  43.676 1.00 69.02  1 . C  ?  
ATOM   2609 N    N    . ASP ASP ASP A A 333 333 . 89.035  1.042  44.074 1.00 82.30  1 . N  ?  
ATOM   2610 CA   CA   . ASP ASP ASP A A 333 333 . 87.715  0.562  43.678 1.00 80.41  1 . C  ?  
ATOM   2611 C    C    . ASP ASP ASP A A 333 333 . 86.676  1.676  43.741 1.00 73.91  1 . C  ?  
ATOM   2612 O    O    . ASP ASP ASP A A 333 333 . 86.090  2.053  42.721 1.00 70.79  1 . O  ?  
ATOM   2613 CB   CB   . ASP ASP ASP A A 333 333 . 87.303  -0.623 44.556 1.00 82.81  1 . C  ?  
ATOM   2614 CG   CG   . ASP ASP ASP A A 333 333 . 87.947  -1.930 44.117 1.00 85.85  1 . C  ?  
ATOM   2615 OD1  OD1  . ASP ASP ASP A A 333 333 . 89.007  -1.890 43.448 1.00 80.78  1 . O  ?  
ATOM   2616 OD2  OD2  . ASP ASP ASP A A 333 333 . 87.388  -2.997 44.451 1.00 84.47  1 . O  ?  
ATOM   2617 N    N    . TYR TYR TYR A A 334 334 . 86.431  2.216  44.938 1.00 71.51  1 . N  ?  
ATOM   2618 CA   CA   . TYR TYR TYR A A 334 334 . 85.362  3.200  45.093 1.00 74.83  1 . C  ?  
ATOM   2619 C    C    . TYR TYR TYR A A 334 334 . 85.517  4.364  44.114 1.00 72.58  1 . C  ?  
ATOM   2620 O    O    . TYR TYR TYR A A 334 334 . 84.536  4.808  43.504 1.00 69.05  1 . O  ?  
ATOM   2621 CB   CB   . TYR TYR TYR A A 334 334 . 85.319  3.707  46.535 1.00 71.19  1 . C  ?  
ATOM   2622 CG   CG   . TYR TYR TYR A A 334 334 . 86.421  4.677  46.878 1.00 72.67  1 . C  ?  
ATOM   2623 CD2  CD2  . TYR TYR TYR A A 334 334 . 86.145  6.017  47.127 1.00 73.64  1 . C  ?  
ATOM   2624 CD1  CD1  . TYR TYR TYR A A 334 334 . 87.740  4.255  46.955 1.00 77.07  1 . C  ?  
ATOM   2625 CE2  CE2  . TYR TYR TYR A A 334 334 . 87.158  6.913  47.449 1.00 70.85  1 . C  ?  
ATOM   2626 CE1  CE1  . TYR TYR TYR A A 334 334 . 88.758  5.138  47.273 1.00 77.46  1 . C  ?  
ATOM   2627 CZ   CZ   . TYR TYR TYR A A 334 334 . 88.463  6.467  47.520 1.00 75.95  1 . C  ?  
ATOM   2628 OH   OH   . TYR TYR TYR A A 334 334 . 89.480  7.341  47.836 1.00 75.04  1 . O  ?  
ATOM   2629 N    N    . MET MET MET A A 335 335 . 86.743  4.861  43.931 1.00 70.28  1 . N  ?  
ATOM   2630 CA   CA   . MET MET MET A A 335 335 . 86.941  5.962  42.998 1.00 70.14  1 . C  ?  
ATOM   2631 C    C    . MET MET MET A A 335 335 . 86.585  5.579  41.567 1.00 69.36  1 . C  ?  
ATOM   2632 O    O    . MET MET MET A A 335 335 . 86.305  6.465  40.747 1.00 71.57  1 . O  ?  
ATOM   2633 CB   CB   . MET MET MET A A 335 335 . 88.379  6.462  43.076 1.00 69.13  1 . C  ?  
ATOM   2634 CG   CG   . MET MET MET A A 335 335 . 88.709  7.131  44.394 1.00 63.99  1 . C  ?  
ATOM   2635 SD   SD   . MET MET MET A A 335 335 . 90.283  8.009  44.305 1.00 64.15  1 . S  ?  
ATOM   2636 CE   CE   . MET MET MET A A 335 335 . 90.144  9.091  45.721 1.00 66.20  1 . C  ?  
ATOM   2637 N    N    . LYS LYS LYS A A 336 336 . 86.590  4.286  41.244 1.00 67.58  1 . N  ?  
ATOM   2638 CA   CA   . LYS LYS LYS A A 336 336 . 86.131  3.857  39.926 1.00 70.82  1 . C  ?  
ATOM   2639 C    C    . LYS LYS LYS A A 336 336 . 84.641  4.131  39.747 1.00 69.55  1 . C  ?  
ATOM   2640 O    O    . LYS LYS LYS A A 336 336 . 84.191  4.458  38.640 1.00 67.93  1 . O  ?  
ATOM   2641 CB   CB   . LYS LYS LYS A A 336 336 . 86.426  2.371  39.728 1.00 75.57  1 . C  ?  
ATOM   2642 CG   CG   . LYS LYS LYS A A 336 336 . 87.894  2.015  39.812 1.00 78.12  1 . C  ?  
ATOM   2643 CD   CD   . LYS LYS LYS A A 336 336 . 88.082  0.611  40.369 1.00 79.20  1 . C  ?  
ATOM   2644 CE   CE   . LYS LYS LYS A A 336 336 . 89.466  0.063  40.033 1.00 82.56  1 . C  ?  
ATOM   2645 NZ   NZ   . LYS LYS LYS A A 336 336 . 89.706  -1.254 40.689 1.00 85.66  1 . N  ?  
ATOM   2646 N    N    . ILE ILE ILE A A 337 337 . 83.860  3.986  40.821 1.00 62.70  1 . N  ?  
ATOM   2647 CA   CA   . ILE ILE ILE A A 337 337 . 82.443  4.338  40.759 1.00 68.81  1 . C  ?  
ATOM   2648 C    C    . ILE ILE ILE A A 337 337 . 82.289  5.795  40.336 1.00 71.05  1 . C  ?  
ATOM   2649 O    O    . ILE ILE ILE A A 337 337 . 81.745  6.102  39.265 1.00 67.69  1 . O  ?  
ATOM   2650 CB   CB   . ILE ILE ILE A A 337 337 . 81.759  4.069  42.115 1.00 67.75  1 . C  ?  
ATOM   2651 CG1  CG1  . ILE ILE ILE A A 337 337 . 82.082  2.660  42.622 1.00 67.30  1 . C  ?  
ATOM   2652 CG2  CG2  . ILE ILE ILE A A 337 337 . 80.268  4.235  41.988 1.00 62.64  1 . C  ?  
ATOM   2653 CD1  CD1  . ILE ILE ILE A A 337 337 . 81.420  2.322  43.953 1.00 65.99  1 . C  ?  
ATOM   2654 N    N    . SER SER SER A A 338 338 . 82.783  6.716  41.173 1.00 68.47  1 . N  ?  
ATOM   2655 CA   CA   . SER SER SER A A 338 338 . 82.780  8.134  40.837 1.00 61.42  1 . C  ?  
ATOM   2656 C    C    . SER SER SER A A 338 338 . 83.249  8.358  39.406 1.00 63.21  1 . C  ?  
ATOM   2657 O    O    . SER SER SER A A 338 338 . 82.563  9.004  38.607 1.00 60.88  1 . O  ?  
ATOM   2658 CB   CB   . SER SER SER A A 338 338 . 83.675  8.897  41.815 1.00 61.29  1 . C  ?  
ATOM   2659 OG   OG   . SER SER SER A A 338 338 . 83.724  8.263  43.087 1.00 63.26  1 . O  ?  
ATOM   2660 N    N    . TYR TYR TYR A A 339 339 . 84.406  7.794  39.053 1.00 63.31  1 . N  ?  
ATOM   2661 CA   CA   . TYR TYR TYR A A 339 339 . 85.049  8.171  37.798 1.00 63.79  1 . C  ?  
ATOM   2662 C    C    . TYR TYR TYR A A 339 339 . 84.189  7.808  36.590 1.00 61.98  1 . C  ?  
ATOM   2663 O    O    . TYR TYR TYR A A 339 339 . 84.008  8.624  35.674 1.00 59.53  1 . O  ?  
ATOM   2664 CB   CB   . TYR TYR TYR A A 339 339 . 86.438  7.533  37.693 1.00 62.68  1 . C  ?  
ATOM   2665 CG   CG   . TYR TYR TYR A A 339 339 . 87.243  8.160  36.572 1.00 68.53  1 . C  ?  
ATOM   2666 CD1  CD1  . TYR TYR TYR A A 339 339 . 88.003  9.302  36.790 1.00 62.96  1 . C  ?  
ATOM   2667 CD2  CD2  . TYR TYR TYR A A 339 339 . 87.197  7.643  35.281 1.00 67.45  1 . C  ?  
ATOM   2668 CE1  CE1  . TYR TYR TYR A A 339 339 . 88.720  9.886  35.767 1.00 61.44  1 . C  ?  
ATOM   2669 CE2  CE2  . TYR TYR TYR A A 339 339 . 87.904  8.225  34.251 1.00 66.12  1 . C  ?  
ATOM   2670 CZ   CZ   . TYR TYR TYR A A 339 339 . 88.667  9.347  34.497 1.00 65.66  1 . C  ?  
ATOM   2671 OH   OH   . TYR TYR TYR A A 339 339 . 89.383  9.930  33.467 1.00 66.67  1 . O  ?  
ATOM   2672 N    N    . LYS LYS LYS A A 340 340 . 83.650  6.583  36.565 1.00 68.34  1 . N  ?  
ATOM   2673 CA   CA   . LYS LYS LYS A A 340 340 . 82.860  6.154  35.411 1.00 64.01  1 . C  ?  
ATOM   2674 C    C    . LYS LYS LYS A A 340 340 . 81.529  6.882  35.347 1.00 61.30  1 . C  ?  
ATOM   2675 O    O    . LYS LYS LYS A A 340 340 . 81.066  7.247  34.258 1.00 64.25  1 . O  ?  
ATOM   2676 CB   CB   . LYS LYS LYS A A 340 340 . 82.617  4.645  35.442 1.00 67.40  1 . C  ?  
ATOM   2677 CG   CG   . LYS LYS LYS A A 340 340 . 81.820  4.153  34.225 1.00 68.94  1 . C  ?  
ATOM   2678 CD   CD   . LYS LYS LYS A A 340 340 . 81.479  2.667  34.313 1.00 74.36  1 . C  ?  
ATOM   2679 CE   CE   . LYS LYS LYS A A 340 340 . 81.235  2.057  32.932 1.00 73.54  1 . C  ?  
ATOM   2680 NZ   NZ   . LYS LYS LYS A A 340 340 . 79.985  2.511  32.277 1.00 70.13  1 . N  ?  
ATOM   2681 N    N    . ALA ALA ALA A A 341 341 . 80.873  7.065  36.494 1.00 56.79  1 . N  ?  
ATOM   2682 CA   CA   . ALA ALA ALA A A 341 341 . 79.623  7.810  36.484 1.00 61.01  1 . C  ?  
ATOM   2683 C    C    . ALA ALA ALA A A 341 341 . 79.835  9.204  35.902 1.00 63.68  1 . C  ?  
ATOM   2684 O    O    . ALA ALA ALA A A 341 341 . 79.036  9.670  35.077 1.00 59.12  1 . O  ?  
ATOM   2685 CB   CB   . ALA ALA ALA A A 341 341 . 79.040  7.887  37.893 1.00 58.27  1 . C  ?  
ATOM   2686 N    N    . ILE ILE ILE A A 342 342 . 80.930  9.870  36.293 1.00 55.61  1 . N  ?  
ATOM   2687 CA   CA   . ILE ILE ILE A A 342 342 . 81.223  11.192 35.748 1.00 55.46  1 . C  ?  
ATOM   2688 C    C    . ILE ILE ILE A A 342 342 . 81.345  11.114 34.235 1.00 54.97  1 . C  ?  
ATOM   2689 O    O    . ILE ILE ILE A A 342 342 . 80.662  11.835 33.501 1.00 55.28  1 . O  ?  
ATOM   2690 CB   CB   . ILE ILE ILE A A 342 342 . 82.495  11.776 36.392 1.00 55.87  1 . C  ?  
ATOM   2691 CG1  CG1  . ILE ILE ILE A A 342 342 . 82.232  12.146 37.848 1.00 49.31  1 . C  ?  
ATOM   2692 CG2  CG2  . ILE ILE ILE A A 342 342 . 82.977  12.992 35.624 1.00 52.01  1 . C  ?  
ATOM   2693 CD1  CD1  . ILE ILE ILE A A 342 342 . 83.450  12.570 38.582 1.00 49.17  1 . C  ?  
ATOM   2694 N    N    . LEU LEU LEU A A 343 343 . 82.197  10.211 33.746 1.00 60.14  1 . N  ?  
ATOM   2695 CA   CA   . LEU LEU LEU A A 343 343 . 82.447  10.154 32.313 1.00 58.69  1 . C  ?  
ATOM   2696 C    C    . LEU LEU LEU A A 343 343 . 81.185  9.803  31.536 1.00 58.96  1 . C  ?  
ATOM   2697 O    O    . LEU LEU LEU A A 343 343 . 80.981  10.302 30.421 1.00 57.99  1 . O  ?  
ATOM   2698 CB   CB   . LEU LEU LEU A A 343 343 . 83.572  9.163  32.032 1.00 59.96  1 . C  ?  
ATOM   2699 CG   CG   . LEU LEU LEU A A 343 343 . 84.898  9.778  31.570 1.00 66.79  1 . C  ?  
ATOM   2700 CD1  CD1  . LEU LEU LEU A A 343 343 . 85.189  11.092 32.283 1.00 61.39  1 . C  ?  
ATOM   2701 CD2  CD2  . LEU LEU LEU A A 343 343 . 86.050  8.797  31.778 1.00 66.80  1 . C  ?  
ATOM   2702 N    N    . ASP ASP ASP A A 344 344 . 80.312  8.975  32.112 1.00 62.36  1 . N  ?  
ATOM   2703 CA   CA   . ASP ASP ASP A A 344 344 . 79.085  8.615  31.409 1.00 62.70  1 . C  ?  
ATOM   2704 C    C    . ASP ASP ASP A A 344 344 . 78.056  9.734  31.468 1.00 62.43  1 . C  ?  
ATOM   2705 O    O    . ASP ASP ASP A A 344 344 . 77.341  9.973  30.484 1.00 61.27  1 . O  ?  
ATOM   2706 CB   CB   . ASP ASP ASP A A 344 344 . 78.509  7.323  31.980 1.00 63.10  1 . C  ?  
ATOM   2707 CG   CG   . ASP ASP ASP A A 344 344 . 79.266  6.114  31.511 1.00 75.92  1 . C  ?  
ATOM   2708 OD1  OD1  . ASP ASP ASP A A 344 344 . 79.518  6.017  30.287 1.00 80.47  1 . O  ?  
ATOM   2709 OD2  OD2  . ASP ASP ASP A A 344 344 . 79.636  5.276  32.361 1.00 78.97  1 . O  ?  
ATOM   2710 N    N    . LEU LEU LEU A A 345 345 . 77.964  10.429 32.607 1.00 61.67  1 . N  ?  
ATOM   2711 CA   CA   . LEU LEU LEU A A 345 345 . 77.097  11.602 32.673 1.00 63.19  1 . C  ?  
ATOM   2712 C    C    . LEU LEU LEU A A 345 345 . 77.353  12.517 31.487 1.00 59.46  1 . C  ?  
ATOM   2713 O    O    . LEU LEU LEU A A 345 345 . 76.407  13.051 30.888 1.00 59.56  1 . O  ?  
ATOM   2714 CB   CB   . LEU LEU LEU A A 345 345 . 77.306  12.358 33.991 1.00 61.32  1 . C  ?  
ATOM   2715 CG   CG   . LEU LEU LEU A A 345 345 . 76.539  13.682 34.145 1.00 56.68  1 . C  ?  
ATOM   2716 CD1  CD1  . LEU LEU LEU A A 345 345 . 75.073  13.518 33.784 1.00 55.57  1 . C  ?  
ATOM   2717 CD2  CD2  . LEU LEU LEU A A 345 345 . 76.671  14.211 35.558 1.00 54.34  1 . C  ?  
ATOM   2718 N    N    . TYR TYR TYR A A 346 346 . 78.629  12.678 31.108 1.00 49.65  1 . N  ?  
ATOM   2719 CA   CA   . TYR TYR TYR A A 346 346 . 78.963  13.576 30.013 1.00 52.68  1 . C  ?  
ATOM   2720 C    C    . TYR TYR TYR A A 346 346 . 78.711  12.958 28.645 1.00 58.14  1 . C  ?  
ATOM   2721 O    O    . TYR TYR TYR A A 346 346 . 78.359  13.691 27.711 1.00 58.83  1 . O  ?  
ATOM   2722 CB   CB   . TYR TYR TYR A A 346 346 . 80.408  14.063 30.163 1.00 56.85  1 . C  ?  
ATOM   2723 CG   CG   . TYR TYR TYR A A 346 346 . 80.473  15.179 31.182 1.00 52.84  1 . C  ?  
ATOM   2724 CD1  CD1  . TYR TYR TYR A A 346 346 . 80.074  16.462 30.839 1.00 48.88  1 . C  ?  
ATOM   2725 CD2  CD2  . TYR TYR TYR A A 346 346 . 80.851  14.934 32.501 1.00 47.63  1 . C  ?  
ATOM   2726 CE1  CE1  . TYR TYR TYR A A 346 346 . 80.087  17.481 31.758 1.00 48.96  1 . C  ?  
ATOM   2727 CE2  CE2  . TYR TYR TYR A A 346 346 . 80.865  15.950 33.435 1.00 47.75  1 . C  ?  
ATOM   2728 CZ   CZ   . TYR TYR TYR A A 346 346 . 80.483  17.230 33.050 1.00 49.13  1 . C  ?  
ATOM   2729 OH   OH   . TYR TYR TYR A A 346 346 . 80.490  18.277 33.945 1.00 46.66  1 . O  ?  
ATOM   2730 N    N    . LYS LYS LYS A A 347 347 . 78.852  11.633 28.500 1.00 60.07  1 . N  ?  
ATOM   2731 CA   CA   . LYS LYS LYS A A 347 347 . 78.381  10.994 27.271 1.00 61.98  1 . C  ?  
ATOM   2732 C    C    . LYS LYS LYS A A 347 347 . 76.881  11.202 27.096 1.00 59.43  1 . C  ?  
ATOM   2733 O    O    . LYS LYS LYS A A 347 347 . 76.422  11.555 26.001 1.00 60.38  1 . O  ?  
ATOM   2734 CB   CB   . LYS LYS LYS A A 347 347 . 78.720  9.498  27.253 1.00 60.71  1 . C  ?  
ATOM   2735 CG   CG   . LYS LYS LYS A A 347 347 . 80.214  9.167  27.248 1.00 64.28  1 . C  ?  
ATOM   2736 CD   CD   . LYS LYS LYS A A 347 347 . 81.045  10.063 26.295 1.00 75.00  1 . C  ?  
ATOM   2737 CE   CE   . LYS LYS LYS A A 347 347 . 81.149  9.505  24.860 1.00 73.11  1 . C  ?  
ATOM   2738 NZ   NZ   . LYS LYS LYS A A 347 347 . 81.952  10.386 23.930 1.00 62.75  1 . N  ?  
ATOM   2739 N    N    . ASP ASP ASP A A 348 348 . 76.104  11.007 28.171 1.00 57.93  1 . N  ?  
ATOM   2740 CA   CA   . ASP ASP ASP A A 348 348 . 74.670  11.304 28.132 1.00 61.14  1 . C  ?  
ATOM   2741 C    C    . ASP ASP ASP A A 348 348 . 74.410  12.740 27.688 1.00 63.16  1 . C  ?  
ATOM   2742 O    O    . ASP ASP ASP A A 348 348 . 73.565  12.989 26.817 1.00 58.62  1 . O  ?  
ATOM   2743 CB   CB   . ASP ASP ASP A A 348 348 . 74.033  11.084 29.503 1.00 63.28  1 . C  ?  
ATOM   2744 CG   CG   . ASP ASP ASP A A 348 348 . 74.056  9.646  29.944 1.00 72.36  1 . C  ?  
ATOM   2745 OD1  OD1  . ASP ASP ASP A A 348 348 . 74.226  8.744  29.085 1.00 76.89  1 . O  ?  
ATOM   2746 OD2  OD2  . ASP ASP ASP A A 348 348 . 73.894  9.427  31.168 1.00 73.70  1 . O  ?  
ATOM   2747 N    N    . TYR TYR TYR A A 349 349 . 75.096  13.706 28.319 1.00 54.61  1 . N  ?  
ATOM   2748 CA   CA   . TYR TYR TYR A A 349 349 . 74.962  15.098 27.907 1.00 55.96  1 . C  ?  
ATOM   2749 C    C    . TYR TYR TYR A A 349 349 . 75.169  15.234 26.404 1.00 58.74  1 . C  ?  
ATOM   2750 O    O    . TYR TYR TYR A A 349 349 . 74.349  15.837 25.699 1.00 61.04  1 . O  ?  
ATOM   2751 CB   CB   . TYR TYR TYR A A 349 349 . 75.959  15.983 28.666 1.00 58.14  1 . C  ?  
ATOM   2752 CG   CG   . TYR TYR TYR A A 349 349 . 75.659  16.249 30.135 1.00 53.09  1 . C  ?  
ATOM   2753 CD1  CD1  . TYR TYR TYR A A 349 349 . 74.380  16.060 30.670 1.00 55.64  1 . C  ?  
ATOM   2754 CD2  CD2  . TYR TYR TYR A A 349 349 . 76.659  16.700 30.983 1.00 49.13  1 . C  ?  
ATOM   2755 CE1  CE1  . TYR TYR TYR A A 349 349 . 74.117  16.316 32.014 1.00 49.33  1 . C  ?  
ATOM   2756 CE2  CE2  . TYR TYR TYR A A 349 349 . 76.412  16.956 32.318 1.00 51.30  1 . C  ?  
ATOM   2757 CZ   CZ   . TYR TYR TYR A A 349 349 . 75.143  16.763 32.834 1.00 51.73  1 . C  ?  
ATOM   2758 OH   OH   . TYR TYR TYR A A 349 349 . 74.915  17.025 34.173 1.00 49.92  1 . O  ?  
ATOM   2759 N    N    . GLU GLU GLU A A 350 350 . 76.263  14.664 25.891 1.00 60.05  1 . N  ?  
ATOM   2760 CA   CA   . GLU GLU GLU A A 350 350 . 76.534  14.760 24.459 1.00 62.48  1 . C  ?  
ATOM   2761 C    C    . GLU GLU GLU A A 350 350 . 75.402  14.158 23.636 1.00 65.59  1 . C  ?  
ATOM   2762 O    O    . GLU GLU GLU A A 350 350 . 75.104  14.645 22.538 1.00 65.37  1 . O  ?  
ATOM   2763 CB   CB   . GLU GLU GLU A A 350 350 . 77.850  14.074 24.120 1.00 63.78  1 . C  ?  
ATOM   2764 CG   CG   . GLU GLU GLU A A 350 350 . 79.087  14.728 24.699 1.00 62.37  1 . C  ?  
ATOM   2765 CD   CD   . GLU GLU GLU A A 350 350 . 80.348  14.063 24.185 1.00 70.83  1 . C  ?  
ATOM   2766 OE1  OE1  . GLU GLU GLU A A 350 350 . 80.623  14.209 22.973 1.00 73.17  1 . O  ?  
ATOM   2767 OE2  OE2  . GLU GLU GLU A A 350 350 . 81.037  13.369 24.975 1.00 71.77  1 . O  ?  
ATOM   2768 N    N    . LYS LYS LYS A A 351 351 . 74.769  13.089 24.141 1.00 60.11  1 . N  ?  
ATOM   2769 CA   CA   . LYS LYS LYS A A 351 351 . 73.647  12.493 23.423 1.00 63.01  1 . C  ?  
ATOM   2770 C    C    . LYS LYS LYS A A 351 351 . 72.418  13.405 23.442 1.00 69.86  1 . C  ?  
ATOM   2771 O    O    . LYS LYS LYS A A 351 351 . 71.777  13.604 22.400 1.00 67.00  1 . O  ?  
ATOM   2772 CB   CB   . LYS LYS LYS A A 351 351 . 73.319  11.116 24.008 1.00 67.96  1 . C  ?  
ATOM   2773 CG   CG   . LYS LYS LYS A A 351 351 . 74.143  9.983  23.403 1.00 73.07  1 . C  ?  
ATOM   2774 CD   CD   . LYS LYS LYS A A 351 351 . 73.934  8.640  24.116 1.00 75.33  1 . C  ?  
ATOM   2775 CE   CE   . LYS LYS LYS A A 351 351 . 74.740  8.554  25.416 1.00 72.68  1 . C  ?  
ATOM   2776 NZ   NZ   . LYS LYS LYS A A 351 351 . 75.078  7.148  25.826 1.00 75.09  1 . N  ?  
ATOM   2777 N    N    . GLU GLU GLU A A 352 352 . 72.076  13.972 24.613 1.00 69.14  1 . N  ?  
ATOM   2778 CA   CA   . GLU GLU GLU A A 352 352 . 70.905  14.847 24.712 1.00 64.30  1 . C  ?  
ATOM   2779 C    C    . GLU GLU GLU A A 352 352 . 70.957  15.979 23.697 1.00 64.50  1 . C  ?  
ATOM   2780 O    O    . GLU GLU GLU A A 352 352 . 69.919  16.404 23.179 1.00 58.30  1 . O  ?  
ATOM   2781 CB   CB   . GLU GLU GLU A A 352 352 . 70.785  15.447 26.116 1.00 59.94  1 . C  ?  
ATOM   2782 CG   CG   . GLU GLU GLU A A 352 352 . 70.479  14.479 27.248 1.00 59.50  1 . C  ?  
ATOM   2783 CD   CD   . GLU GLU GLU A A 352 352 . 70.105  15.202 28.552 1.00 64.15  1 . C  ?  
ATOM   2784 OE1  OE1  . GLU GLU GLU A A 352 352 . 70.752  14.949 29.594 1.00 63.66  1 . O  ?  
ATOM   2785 OE2  OE2  . GLU GLU GLU A A 352 352 . 69.160  16.027 28.538 1.00 61.09  1 . O  ?  
ATOM   2786 N    N    . LEU LEU LEU A A 353 353 . 72.153  16.474 23.393 1.00 65.05  1 . N  ?  
ATOM   2787 CA   CA   . LEU LEU LEU A A 353 353 . 72.306  17.663 22.563 1.00 68.94  1 . C  ?  
ATOM   2788 C    C    . LEU LEU LEU A A 353 353 . 72.520  17.343 21.085 1.00 71.27  1 . C  ?  
ATOM   2789 O    O    . LEU LEU LEU A A 353 353 . 72.595  18.267 20.265 1.00 65.56  1 . O  ?  
ATOM   2790 CB   CB   . LEU LEU LEU A A 353 353 . 73.467  18.512 23.101 1.00 69.18  1 . C  ?  
ATOM   2791 CG   CG   . LEU LEU LEU A A 353 353 . 73.368  18.966 24.568 1.00 62.38  1 . C  ?  
ATOM   2792 CD1  CD1  . LEU LEU LEU A A 353 353 . 74.647  19.633 25.022 1.00 64.83  1 . C  ?  
ATOM   2793 CD2  CD2  . LEU LEU LEU A A 353 353 . 72.202  19.906 24.764 1.00 64.98  1 . C  ?  
ATOM   2794 N    N    . SER SER SER A A 354 354 . 72.594  16.061 20.723 1.00 75.89  1 . N  ?  
ATOM   2795 CA   CA   . SER SER SER A A 354 354 . 72.859  15.648 19.348 1.00 77.64  1 . C  ?  
ATOM   2796 C    C    . SER SER SER A A 354 354 . 71.793  16.189 18.404 1.00 77.36  1 . C  ?  
ATOM   2797 O    O    . SER SER SER A A 354 354 . 72.078  17.031 17.546 1.00 78.62  1 . O  ?  
ATOM   2798 CB   CB   . SER SER SER A A 354 354 . 72.920  14.123 19.259 1.00 77.99  1 . C  ?  
ATOM   2799 OG   OG   . SER SER SER A A 354 354 . 73.600  13.575 20.377 1.00 77.36  1 . O  ?  
ATOM   2800 N    N    . SER SER SER A A 355 355 . 70.564  15.704 18.568 1.00 69.66  1 . N  ?  
ATOM   2801 CA   CA   . SER SER SER A A 355 355 . 69.407  16.151 17.804 1.00 73.72  1 . C  ?  
ATOM   2802 C    C    . SER SER SER A A 355 355 . 69.479  17.612 17.375 1.00 82.14  1 . C  ?  
ATOM   2803 O    O    . SER SER SER A A 355 355 . 69.087  17.949 16.252 1.00 87.67  1 . O  ?  
ATOM   2804 CB   CB   . SER SER SER A A 355 355 . 68.145  15.945 18.630 1.00 79.09  1 . C  ?  
ATOM   2805 OG   OG   . SER SER SER A A 355 355 . 68.243  16.692 19.831 1.00 87.17  1 . O  ?  
ATOM   2806 N    N    . ALA ALA ALA A A 356 356 . 69.945  18.494 18.259 1.00 77.41  1 . N  ?  
ATOM   2807 CA   CA   . ALA ALA ALA A A 356 356 . 70.025  19.915 17.942 1.00 79.14  1 . C  ?  
ATOM   2808 C    C    . ALA ALA ALA A A 356 356 . 71.409  20.347 17.485 1.00 74.85  1 . C  ?  
ATOM   2809 O    O    . ALA ALA ALA A A 356 356 . 71.602  21.528 17.185 1.00 74.78  1 . O  ?  
ATOM   2810 CB   CB   . ALA ALA ALA A A 356 356 . 69.593  20.762 19.146 1.00 80.11  1 . C  ?  
ATOM   2811 N    N    . GLY GLY GLY A A 357 357 . 72.371  19.428 17.426 1.00 73.73  1 . N  ?  
ATOM   2812 CA   CA   . GLY GLY GLY A A 357 357 . 73.688  19.771 16.927 1.00 76.92  1 . C  ?  
ATOM   2813 C    C    . GLY GLY GLY A A 357 357 . 74.544  20.559 17.889 1.00 76.59  1 . C  ?  
ATOM   2814 O    O    . GLY GLY GLY A A 357 357 . 75.487  21.232 17.456 1.00 77.84  1 . O  ?  
ATOM   2815 N    N    . ARG ARG ARG A A 358 358 . 74.248  20.483 19.188 1.00 72.49  1 . N  ?  
ATOM   2816 CA   CA   . ARG ARG ARG A A 358 358 . 74.951  21.239 20.217 1.00 72.26  1 . C  ?  
ATOM   2817 C    C    . ARG ARG ARG A A 358 358 . 75.834  20.362 21.092 1.00 69.16  1 . C  ?  
ATOM   2818 O    O    . ARG ARG ARG A A 358 358 . 76.246  20.800 22.171 1.00 69.34  1 . O  ?  
ATOM   2819 CB   CB   . ARG ARG ARG A A 358 358 . 73.949  21.990 21.096 1.00 69.18  1 . C  ?  
ATOM   2820 CG   CG   . ARG ARG ARG A A 358 358 . 72.840  22.659 20.331 1.00 68.63  1 . C  ?  
ATOM   2821 CD   CD   . ARG ARG ARG A A 358 358 . 71.822  23.272 21.280 1.00 74.23  1 . C  ?  
ATOM   2822 NE   NE   . ARG ARG ARG A A 358 358 . 72.391  24.382 22.041 1.00 77.05  1 . N  ?  
ATOM   2823 CZ   CZ   . ARG ARG ARG A A 358 358 . 72.486  24.432 23.370 1.00 72.07  1 . C  ?  
ATOM   2824 NH1  NH1  . ARG ARG ARG A A 358 358 . 72.024  23.430 24.124 1.00 56.35  1 . N  ?  
ATOM   2825 NH2  NH2  . ARG ARG ARG A A 358 358 . 73.038  25.509 23.943 1.00 66.76  1 . N  ?  
ATOM   2826 N    N    . SER SER SER A A 359 359 . 76.132  19.134 20.663 1.00 72.26  1 . N  ?  
ATOM   2827 CA   CA   . SER SER SER A A 359 359 . 76.898  18.227 21.512 1.00 64.97  1 . C  ?  
ATOM   2828 C    C    . SER SER SER A A 359 359 . 78.271  18.788 21.837 1.00 64.74  1 . C  ?  
ATOM   2829 O    O    . SER SER SER A A 359 359 . 78.818  18.511 22.910 1.00 65.33  1 . O  ?  
ATOM   2830 CB   CB   . SER SER SER A A 359 359 . 77.030  16.870 20.831 1.00 64.13  1 . C  ?  
ATOM   2831 OG   OG   . SER SER SER A A 359 359 . 75.753  16.426 20.393 1.00 73.20  1 . O  ?  
ATOM   2832 N    N    . HIS HIS HIS A A 360 360 . 78.839  19.586 20.933 1.00 66.54  1 . N  ?  
ATOM   2833 CA   CA   . HIS HIS HIS A A 360 360 . 80.220  20.020 21.103 1.00 63.30  1 . C  ?  
ATOM   2834 C    C    . HIS HIS HIS A A 360 360 . 80.409  20.856 22.368 1.00 70.28  1 . C  ?  
ATOM   2835 O    O    . HIS HIS HIS A A 360 360 . 81.479  20.804 22.987 1.00 65.94  1 . O  ?  
ATOM   2836 CB   CB   . HIS HIS HIS A A 360 360 . 80.678  20.796 19.864 1.00 61.29  1 . C  ?  
ATOM   2837 CG   CG   . HIS HIS HIS A A 360 360 . 79.746  21.891 19.449 1.00 67.30  1 . C  ?  
ATOM   2838 ND1  ND1  . HIS HIS HIS A A 360 360 . 78.520  21.646 18.867 1.00 73.53  1 . N  ?  
ATOM   2839 CD2  CD2  . HIS HIS HIS A A 360 360 . 79.861  23.239 19.531 1.00 74.51  1 . C  ?  
ATOM   2840 CE1  CE1  . HIS HIS HIS A A 360 360 . 77.918  22.796 18.611 1.00 75.49  1 . C  ?  
ATOM   2841 NE2  NE2  . HIS HIS HIS A A 360 360 . 78.710  23.779 19.005 1.00 72.98  1 . N  ?  
ATOM   2842 N    N    . ILE ILE ILE A A 361 361 . 79.385  21.609 22.791 1.00 67.22  1 . N  ?  
ATOM   2843 CA   CA   . ILE ILE ILE A A 361 361 . 79.557  22.532 23.909 1.00 59.79  1 . C  ?  
ATOM   2844 C    C    . ILE ILE ILE A A 361 361 . 79.803  21.842 25.243 1.00 60.70  1 . C  ?  
ATOM   2845 O    O    . ILE ILE ILE A A 361 361 . 80.230  22.502 26.198 1.00 61.33  1 . O  ?  
ATOM   2846 CB   CB   . ILE ILE ILE A A 361 361 . 78.339  23.460 24.055 1.00 60.66  1 . C  ?  
ATOM   2847 CG1  CG1  . ILE ILE ILE A A 361 361 . 77.085  22.626 24.331 1.00 60.45  1 . C  ?  
ATOM   2848 CG2  CG2  . ILE ILE ILE A A 361 361 . 78.188  24.321 22.820 1.00 61.37  1 . C  ?  
ATOM   2849 CD1  CD1  . ILE ILE ILE A A 361 361 . 75.857  23.445 24.496 1.00 58.70  1 . C  ?  
ATOM   2850 N    N    . VAL VAL VAL A A 362 362 . 79.561  20.535 25.345 1.00 55.61  1 . N  ?  
ATOM   2851 CA   CA   . VAL VAL VAL A A 362 362 . 79.827  19.841 26.602 1.00 53.89  1 . C  ?  
ATOM   2852 C    C    . VAL VAL VAL A A 362 362 . 81.265  20.051 27.053 1.00 53.57  1 . C  ?  
ATOM   2853 O    O    . VAL VAL VAL A A 362 362 . 81.560  20.043 28.254 1.00 54.80  1 . O  ?  
ATOM   2854 CB   CB   . VAL VAL VAL A A 362 362 . 79.499  18.340 26.457 1.00 58.34  1 . C  ?  
ATOM   2855 CG1  CG1  . VAL VAL VAL A A 362 362 . 79.725  17.597 27.786 1.00 51.58  1 . C  ?  
ATOM   2856 CG2  CG2  . VAL VAL VAL A A 362 362 . 78.078  18.164 25.968 1.00 62.32  1 . C  ?  
ATOM   2857 N    N    . CYS CYS CYS A A 363 363 . 82.186  20.235 26.112 1.00 54.25  1 . N  ?  
ATOM   2858 CA   CA   . CYS CYS CYS A A 363 363 . 83.597  20.285 26.484 1.00 56.03  1 . C  ?  
ATOM   2859 C    C    . CYS CYS CYS A A 363 363 . 83.923  21.520 27.317 1.00 55.94  1 . C  ?  
ATOM   2860 O    O    . CYS CYS CYS A A 363 363 . 84.864  21.488 28.122 1.00 48.68  1 . O  ?  
ATOM   2861 CB   CB   . CYS CYS CYS A A 363 363 . 84.462  20.243 25.229 1.00 59.66  1 . C  ?  
ATOM   2862 SG   SG   . CYS CYS CYS A A 363 363 . 84.022  21.542 24.059 1.00 76.48  1 . S  ?  
ATOM   2863 N    N    . HIS HIS HIS A A 364 364 . 83.161  22.610 27.156 1.00 55.35  1 . N  ?  
ATOM   2864 CA   CA   . HIS HIS HIS A A 364 364 . 83.356  23.765 28.028 1.00 51.37  1 . C  ?  
ATOM   2865 C    C    . HIS HIS HIS A A 364 364 . 83.119  23.386 29.480 1.00 51.15  1 . C  ?  
ATOM   2866 O    O    . HIS HIS HIS A A 364 364 . 83.943  23.676 30.358 1.00 49.66  1 . O  ?  
ATOM   2867 CB   CB   . HIS HIS HIS A A 364 364 . 82.430  24.902 27.621 1.00 48.72  1 . C  ?  
ATOM   2868 CG   CG   . HIS HIS HIS A A 364 364 . 82.685  25.416 26.243 1.00 51.59  1 . C  ?  
ATOM   2869 ND1  ND1  . HIS HIS HIS A A 364 364 . 83.844  26.077 25.900 1.00 53.71  1 . N  ?  
ATOM   2870 CD2  CD2  . HIS HIS HIS A A 364 364 . 81.926  25.375 25.123 1.00 53.79  1 . C  ?  
ATOM   2871 CE1  CE1  . HIS HIS HIS A A 364 364 . 83.789  26.418 24.624 1.00 58.64  1 . C  ?  
ATOM   2872 NE2  NE2  . HIS HIS HIS A A 364 364 . 82.637  25.999 24.129 1.00 53.81  1 . N  ?  
ATOM   2873 N    N    . ALA ALA ALA A A 365 365 . 81.996  22.720 29.749 1.00 47.91  1 . N  ?  
ATOM   2874 CA   CA   . ALA ALA ALA A A 365 365 . 81.683  22.327 31.114 1.00 45.67  1 . C  ?  
ATOM   2875 C    C    . ALA ALA ALA A A 365 365 . 82.727  21.360 31.652 1.00 47.08  1 . C  ?  
ATOM   2876 O    O    . ALA ALA ALA A A 365 365 . 83.093  21.420 32.833 1.00 50.62  1 . O  ?  
ATOM   2877 CB   CB   . ALA ALA ALA A A 365 365 . 80.278  21.720 31.163 1.00 47.90  1 . C  ?  
ATOM   2878 N    N    . ILE ILE ILE A A 366 366 . 83.239  20.478 30.790 1.00 51.43  1 . N  ?  
ATOM   2879 CA   CA   . ILE ILE ILE A A 366 366 . 84.265  19.516 31.199 1.00 49.54  1 . C  ?  
ATOM   2880 C    C    . ILE ILE ILE A A 366 366 . 85.546  20.228 31.623 1.00 49.31  1 . C  ?  
ATOM   2881 O    O    . ILE ILE ILE A A 366 366 . 86.142  19.912 32.665 1.00 49.46  1 . O  ?  
ATOM   2882 CB   CB   . ILE ILE ILE A A 366 366 . 84.531  18.518 30.061 1.00 51.26  1 . C  ?  
ATOM   2883 CG1  CG1  . ILE ILE ILE A A 366 366 . 83.361  17.530 29.947 1.00 53.49  1 . C  ?  
ATOM   2884 CG2  CG2  . ILE ILE ILE A A 366 366 . 85.866  17.817 30.285 1.00 53.93  1 . C  ?  
ATOM   2885 CD1  CD1  . ILE ILE ILE A A 366 366 . 83.511  16.500 28.851 1.00 45.54  1 . C  ?  
ATOM   2886 N    N    . GLU GLU GLU A A 367 367 . 86.007  21.187 30.810 1.00 45.26  1 . N  ?  
ATOM   2887 CA   CA   . GLU GLU GLU A A 367 367 . 87.224  21.916 31.158 1.00 48.66  1 . C  ?  
ATOM   2888 C    C    . GLU GLU GLU A A 367 367 . 87.095  22.607 32.512 1.00 47.80  1 . C  ?  
ATOM   2889 O    O    . GLU GLU GLU A A 367 367 . 88.049  22.620 33.302 1.00 45.98  1 . O  ?  
ATOM   2890 CB   CB   . GLU GLU GLU A A 367 367 . 87.568  22.921 30.063 1.00 48.11  1 . C  ?  
ATOM   2891 CG   CG   . GLU GLU GLU A A 367 367 . 88.032  22.248 28.777 1.00 55.84  1 . C  ?  
ATOM   2892 CD   CD   . GLU GLU GLU A A 367 367 . 89.239  21.333 28.992 1.00 62.41  1 . C  ?  
ATOM   2893 OE1  OE1  . GLU GLU GLU A A 367 367 . 90.279  21.821 29.501 1.00 67.74  1 . O  ?  
ATOM   2894 OE2  OE2  . GLU GLU GLU A A 367 367 . 89.144  20.128 28.665 1.00 65.88  1 . O  ?  
ATOM   2895 N    N    . ARG ARG ARG A A 368 368 . 85.912  23.163 32.811 1.00 44.53  1 . N  ?  
ATOM   2896 CA   CA   . ARG ARG ARG A A 368 368 . 85.694  23.772 34.120 1.00 40.71  1 . C  ?  
ATOM   2897 C    C    . ARG ARG ARG A A 368 368 . 85.630  22.732 35.226 1.00 44.26  1 . C  ?  
ATOM   2898 O    O    . ARG ARG ARG A A 368 368 . 85.983  23.036 36.370 1.00 47.10  1 . O  ?  
ATOM   2899 CB   CB   . ARG ARG ARG A A 368 368 . 84.408  24.597 34.132 1.00 44.47  1 . C  ?  
ATOM   2900 CG   CG   . ARG ARG ARG A A 368 368 . 84.454  25.887 33.341 1.00 40.35  1 . C  ?  
ATOM   2901 CD   CD   . ARG ARG ARG A A 368 368 . 85.299  26.952 34.005 1.00 38.44  1 . C  ?  
ATOM   2902 NE   NE   . ARG ARG ARG A A 368 368 . 85.017  28.243 33.394 1.00 39.62  1 . N  ?  
ATOM   2903 CZ   CZ   . ARG ARG ARG A A 368 368 . 85.554  29.381 33.801 1.00 43.50  1 . C  ?  
ATOM   2904 NH1  NH1  . ARG ARG ARG A A 368 368 . 86.390  29.376 34.828 1.00 41.29  1 . N  ?  
ATOM   2905 NH2  NH2  . ARG ARG ARG A A 368 368 . 85.245  30.525 33.193 1.00 45.17  1 . N  ?  
ATOM   2906 N    N    . MET MET MET A A 369 369 . 85.174  21.511 34.932 1.00 42.58  1 . N  ?  
ATOM   2907 CA   CA   . MET MET MET A A 369 369 . 85.213  20.489 35.976 1.00 45.52  1 . C  ?  
ATOM   2908 C    C    . MET MET MET A A 369 369 . 86.642  20.033 36.263 1.00 46.01  1 . C  ?  
ATOM   2909 O    O    . MET MET MET A A 369 369 . 87.009  19.829 37.431 1.00 43.99  1 . O  ?  
ATOM   2910 CB   CB   . MET MET MET A A 369 369 . 84.347  19.291 35.616 1.00 44.21  1 . C  ?  
ATOM   2911 CG   CG   . MET MET MET A A 369 369 . 84.220  18.353 36.800 1.00 46.55  1 . C  ?  
ATOM   2912 SD   SD   . MET MET MET A A 369 369 . 83.594  16.704 36.416 1.00 52.94  1 . S  ?  
ATOM   2913 CE   CE   . MET MET MET A A 369 369 . 83.213  16.134 38.067 1.00 47.45  1 . C  ?  
ATOM   2914 N    N    . LYS LYS LYS A A 370 370 . 87.465  19.865 35.220 1.00 42.15  1 . N  ?  
ATOM   2915 CA   CA   . LYS LYS LYS A A 370 370 . 88.884  19.589 35.464 1.00 48.66  1 . C  ?  
ATOM   2916 C    C    . LYS LYS LYS A A 370 370 . 89.488  20.640 36.392 1.00 47.24  1 . C  ?  
ATOM   2917 O    O    . LYS LYS LYS A A 370 370 . 90.195  20.304 37.355 1.00 43.03  1 . O  ?  
ATOM   2918 CB   CB   . LYS LYS LYS A A 370 370 . 89.664  19.526 34.148 1.00 48.58  1 . C  ?  
ATOM   2919 CG   CG   . LYS LYS LYS A A 370 370 . 89.375  18.307 33.275 1.00 52.06  1 . C  ?  
ATOM   2920 CD   CD   . LYS LYS LYS A A 370 370 . 89.986  18.483 31.883 1.00 55.09  1 . C  ?  
ATOM   2921 CE   CE   . LYS LYS LYS A A 370 370 . 89.613  17.339 30.958 1.00 55.75  1 . C  ?  
ATOM   2922 NZ   NZ   . LYS LYS LYS A A 370 370 . 90.390  17.372 29.694 1.00 60.29  1 . N  ?  
ATOM   2923 N    N    . GLU GLU GLU A A 371 371 . 89.190  21.926 36.124 1.00 46.99  1 . N  ?  
ATOM   2924 CA   CA   . GLU GLU GLU A A 371 371 . 89.714  23.023 36.944 1.00 44.19  1 . C  ?  
ATOM   2925 C    C    . GLU GLU GLU A A 371 371 . 89.297  22.874 38.404 1.00 42.11  1 . C  ?  
ATOM   2926 O    O    . GLU GLU GLU A A 371 371 . 90.128  23.002 39.313 1.00 43.30  1 . O  ?  
ATOM   2927 CB   CB   . GLU GLU GLU A A 371 371 . 89.249  24.372 36.375 1.00 43.25  1 . C  ?  
ATOM   2928 CG   CG   . GLU GLU GLU A A 371 371 . 89.528  25.572 37.258 1.00 38.93  1 . C  ?  
ATOM   2929 CD   CD   . GLU GLU GLU A A 371 371 . 89.006  26.908 36.669 1.00 51.26  1 . C  ?  
ATOM   2930 OE1  OE1  . GLU GLU GLU A A 371 371 . 87.938  26.941 36.003 1.00 45.91  1 . O  ?  
ATOM   2931 OE2  OE2  . GLU GLU GLU A A 371 371 . 89.678  27.945 36.879 1.00 54.57  1 . O  ?  
ATOM   2932 N    N    . VAL VAL VAL A A 372 372 . 88.012  22.600 38.648 1.00 41.91  1 . N  ?  
ATOM   2933 CA   CA   . VAL VAL VAL A A 372 372 . 87.533  22.379 40.014 1.00 43.50  1 . C  ?  
ATOM   2934 C    C    . VAL VAL VAL A A 372 372 . 88.358  21.300 40.693 1.00 41.62  1 . C  ?  
ATOM   2935 O    O    . VAL VAL VAL A A 372 372 . 88.782  21.452 41.844 1.00 41.25  1 . O  ?  
ATOM   2936 CB   CB   . VAL VAL VAL A A 372 372 . 86.034  22.003 40.025 1.00 42.17  1 . C  ?  
ATOM   2937 CG1  CG1  . VAL VAL VAL A A 372 372 . 85.580  21.712 41.449 1.00 34.95  1 . C  ?  
ATOM   2938 CG2  CG2  . VAL VAL VAL A A 372 372 . 85.198  23.093 39.415 1.00 41.72  1 . C  ?  
ATOM   2939 N    N    . VAL VAL VAL A A 373 373 . 88.558  20.170 40.008 1.00 41.98  1 . N  ?  
ATOM   2940 CA   CA   . VAL VAL VAL A A 373 373 . 89.233  19.042 40.644 1.00 45.56  1 . C  ?  
ATOM   2941 C    C    . VAL VAL VAL A A 373 373 . 90.682  19.399 40.963 1.00 46.30  1 . C  ?  
ATOM   2942 O    O    . VAL VAL VAL A A 373 373 . 91.152  19.176 42.087 1.00 47.03  1 . O  ?  
ATOM   2943 CB   CB   . VAL VAL VAL A A 373 373 . 89.136  17.772 39.774 1.00 50.09  1 . C  ?  
ATOM   2944 CG1  CG1  . VAL VAL VAL A A 373 373 . 89.969  16.633 40.383 1.00 47.92  1 . C  ?  
ATOM   2945 CG2  CG2  . VAL VAL VAL A A 373 373 . 87.686  17.344 39.607 1.00 39.43  1 . C  ?  
ATOM   2946 N    N    . ARG ARG ARG A A 374 374 . 91.410  19.975 39.995 1.00 43.55  1 . N  ?  
ATOM   2947 CA   CA   . ARG ARG ARG A A 374 374 . 92.765  20.443 40.306 1.00 43.31  1 . C  ?  
ATOM   2948 C    C    . ARG ARG ARG A A 374 374 . 92.777  21.219 41.612 1.00 42.13  1 . C  ?  
ATOM   2949 O    O    . ARG ARG ARG A A 374 374 . 93.607  20.966 42.488 1.00 45.79  1 . O  ?  
ATOM   2950 CB   CB   . ARG ARG ARG A A 374 374 . 93.335  21.318 39.188 1.00 44.77  1 . C  ?  
ATOM   2951 CG   CG   . ARG ARG ARG A A 374 374 . 93.644  20.617 37.885 1.00 43.92  1 . C  ?  
ATOM   2952 CD   CD   . ARG ARG ARG A A 374 374 . 94.434  21.533 36.986 1.00 41.91  1 . C  ?  
ATOM   2953 NE   NE   . ARG ARG ARG A A 374 374 . 93.686  22.714 36.576 1.00 48.30  1 . N  ?  
ATOM   2954 CZ   CZ   . ARG ARG ARG A A 374 374 . 92.925  22.776 35.486 1.00 47.30  1 . C  ?  
ATOM   2955 NH1  NH1  . ARG ARG ARG A A 374 374 . 92.808  21.723 34.696 1.00 47.70  1 . N  ?  
ATOM   2956 NH2  NH2  . ARG ARG ARG A A 374 374 . 92.282  23.893 35.178 1.00 49.41  1 . N  ?  
ATOM   2957 N    N    . ASN ASN ASN A A 375 375 . 91.846  22.170 41.766 1.00 44.45  1 . N  ?  
ATOM   2958 CA   CA   . ASN ASN ASN A A 375 375 . 91.914  23.057 42.922 1.00 44.21  1 . C  ?  
ATOM   2959 C    C    . ASN ASN ASN A A 375 375 . 91.496  22.358 44.209 1.00 46.22  1 . C  ?  
ATOM   2960 O    O    . ASN ASN ASN A A 375 375 . 91.991  22.714 45.287 1.00 46.64  1 . O  ?  
ATOM   2961 CB   CB   . ASN ASN ASN A A 375 375 . 91.072  24.303 42.672 1.00 48.59  1 . C  ?  
ATOM   2962 CG   CG   . ASN ASN ASN A A 375 375 . 91.668  25.194 41.603 1.00 50.85  1 . C  ?  
ATOM   2963 OD1  OD1  . ASN ASN ASN A A 375 375 . 92.480  24.742 40.782 1.00 46.31  1 . O  ?  
ATOM   2964 ND2  ND2  . ASN ASN ASN A A 375 375 . 91.274  26.476 41.606 1.00 45.68  1 . N  ?  
ATOM   2965 N    N    . TYR TYR TYR A A 376 376 . 90.583  21.386 44.128 1.00 46.08  1 . N  ?  
ATOM   2966 CA   CA   . TYR TYR TYR A A 376 376 . 90.387  20.460 45.239 1.00 48.11  1 . C  ?  
ATOM   2967 C    C    . TYR TYR TYR A A 376 376 . 91.721  19.855 45.664 1.00 46.72  1 . C  ?  
ATOM   2968 O    O    . TYR TYR TYR A A 376 376 . 92.101  19.896 46.841 1.00 45.03  1 . O  ?  
ATOM   2969 CB   CB   . TYR TYR TYR A A 376 376 . 89.405  19.350 44.839 1.00 49.96  1 . C  ?  
ATOM   2970 CG   CG   . TYR TYR TYR A A 376 376 . 87.943  19.738 44.866 1.00 52.35  1 . C  ?  
ATOM   2971 CD1  CD1  . TYR TYR TYR A A 376 376 . 87.526  20.942 45.443 1.00 51.55  1 . C  ?  
ATOM   2972 CD2  CD2  . TYR TYR TYR A A 376 376 . 86.972  18.895 44.324 1.00 51.41  1 . C  ?  
ATOM   2973 CE1  CE1  . TYR TYR TYR A A 376 376 . 86.190  21.293 45.472 1.00 48.10  1 . C  ?  
ATOM   2974 CE2  CE2  . TYR TYR TYR A A 376 376 . 85.628  19.244 44.350 1.00 52.45  1 . C  ?  
ATOM   2975 CZ   CZ   . TYR TYR TYR A A 376 376 . 85.248  20.447 44.923 1.00 52.45  1 . C  ?  
ATOM   2976 OH   OH   . TYR TYR TYR A A 376 376 . 83.924  20.800 44.964 1.00 52.80  1 . O  ?  
ATOM   2977 N    N    . ASN ASN ASN A A 377 377 . 92.456  19.303 44.699 1.00 45.86  1 . N  ?  
ATOM   2978 CA   CA   . ASN ASN ASN A A 377 377 . 93.740  18.675 45.004 1.00 51.22  1 . C  ?  
ATOM   2979 C    C    . ASN ASN ASN A A 377 377 . 94.700  19.656 45.678 1.00 51.00  1 . C  ?  
ATOM   2980 O    O    . ASN ASN ASN A A 377 377 . 95.294  19.345 46.721 1.00 47.98  1 . O  ?  
ATOM   2981 CB   CB   . ASN ASN ASN A A 377 377 . 94.351  18.110 43.729 1.00 48.47  1 . C  ?  
ATOM   2982 CG   CG   . ASN ASN ASN A A 377 377 . 95.343  17.016 44.011 1.00 58.98  1 . C  ?  
ATOM   2983 OD1  OD1  . ASN ASN ASN A A 377 377 . 94.976  15.846 44.136 1.00 57.57  1 . O  ?  
ATOM   2984 ND2  ND2  . ASN ASN ASN A A 377 377 . 96.613  17.389 44.129 1.00 55.70  1 . N  ?  
ATOM   2985 N    N    . VAL VAL VAL A A 378 378 . 94.868  20.852 45.102 1.00 47.77  1 . N  ?  
ATOM   2986 CA   CA   . VAL VAL VAL A A 378 378 . 95.727  21.841 45.748 1.00 45.15  1 . C  ?  
ATOM   2987 C    C    . VAL VAL VAL A A 378 378 . 95.295  22.040 47.191 1.00 49.04  1 . C  ?  
ATOM   2988 O    O    . VAL VAL VAL A A 378 378 . 96.128  22.091 48.107 1.00 53.97  1 . O  ?  
ATOM   2989 CB   CB   . VAL VAL VAL A A 378 378 . 95.714  23.167 44.966 1.00 46.24  1 . C  ?  
ATOM   2990 CG1  CG1  . VAL VAL VAL A A 378 378 . 96.334  24.298 45.808 1.00 43.48  1 . C  ?  
ATOM   2991 CG2  CG2  . VAL VAL VAL A A 378 378 . 96.433  23.000 43.644 1.00 36.96  1 . C  ?  
ATOM   2992 N    N    . GLU GLU GLU A A 379 379 . 93.981  22.140 47.415 1.00 51.17  1 . N  ?  
ATOM   2993 CA   CA   . GLU GLU GLU A A 379 379 . 93.459  22.412 48.753 1.00 50.49  1 . C  ?  
ATOM   2994 C    C    . GLU GLU GLU A A 379 379 . 93.759  21.252 49.695 1.00 48.53  1 . C  ?  
ATOM   2995 O    O    . GLU GLU GLU A A 379 379 . 94.076  21.462 50.872 1.00 44.64  1 . O  ?  
ATOM   2996 CB   CB   . GLU GLU GLU A A 379 379 . 91.957  22.704 48.657 1.00 43.77  1 . C  ?  
ATOM   2997 CG   CG   . GLU GLU GLU A A 379 379 . 91.190  22.753 49.973 1.00 54.11  1 . C  ?  
ATOM   2998 CD   CD   . GLU GLU GLU A A 379 379 . 89.669  22.864 49.755 1.00 64.41  1 . C  ?  
ATOM   2999 OE1  OE1  . GLU GLU GLU A A 379 379 . 89.259  23.575 48.813 1.00 68.19  1 . O  ?  
ATOM   3000 OE2  OE2  . GLU GLU GLU A A 379 379 . 88.881  22.234 50.506 1.00 74.66  1 . O  ?  
ATOM   3001 N    N    . SER SER SER A A 380 380 . 93.682  20.018 49.189 1.00 47.44  1 . N  ?  
ATOM   3002 CA   CA   . SER SER SER A A 380 380 . 94.163  18.873 49.957 1.00 50.70  1 . C  ?  
ATOM   3003 C    C    . SER SER SER A A 380 380 . 95.637  19.048 50.329 1.00 57.23  1 . C  ?  
ATOM   3004 O    O    . SER SER SER A A 380 380 . 96.005  19.001 51.513 1.00 56.16  1 . O  ?  
ATOM   3005 CB   CB   . SER SER SER A A 380 380 . 93.950  17.586 49.158 1.00 48.82  1 . C  ?  
ATOM   3006 OG   OG   . SER SER SER A A 380 380 . 94.325  16.439 49.906 1.00 60.69  1 . O  ?  
ATOM   3007 N    N    . THR THR THR A A 381 381 . 96.497  19.277 49.327 1.00 50.01  1 . N  ?  
ATOM   3008 CA   CA   . THR THR THR A A 381 381 . 97.912  19.511 49.601 1.00 46.13  1 . C  ?  
ATOM   3009 C    C    . THR THR THR A A 381 381 . 98.110  20.564 50.684 1.00 51.22  1 . C  ?  
ATOM   3010 O    O    . THR THR THR A A 381 381 . 98.915  20.378 51.600 1.00 53.95  1 . O  ?  
ATOM   3011 CB   CB   . THR THR THR A A 381 381 . 98.644  19.939 48.336 1.00 47.50  1 . C  ?  
ATOM   3012 OG1  OG1  . THR THR THR A A 381 381 . 98.336  19.047 47.258 1.00 47.83  1 . O  ?  
ATOM   3013 CG2  CG2  . THR THR THR A A 381 381 . 100.140 19.919 48.599 1.00 47.49  1 . C  ?  
ATOM   3014 N    N    . TRP TRP TRP A A 382 382 . 97.410  21.698 50.584 1.00 49.87  1 . N  ?  
ATOM   3015 CA   CA   . TRP TRP TRP A A 382 382 . 97.618  22.740 51.586 1.00 52.77  1 . C  ?  
ATOM   3016 C    C    . TRP TRP TRP A A 382 382 . 97.253  22.233 52.972 1.00 54.16  1 . C  ?  
ATOM   3017 O    O    . TRP TRP TRP A A 382 382 . 97.920  22.556 53.963 1.00 57.65  1 . O  ?  
ATOM   3018 CB   CB   . TRP TRP TRP A A 382 382 . 96.807  23.993 51.253 1.00 51.14  1 . C  ?  
ATOM   3019 CG   CG   . TRP TRP TRP A A 382 382 . 97.290  24.788 50.083 1.00 53.70  1 . C  ?  
ATOM   3020 CD1  CD1  . TRP TRP TRP A A 382 382 . 98.438  24.598 49.365 1.00 53.60  1 . C  ?  
ATOM   3021 CD2  CD2  . TRP TRP TRP A A 382 382 . 96.633  25.918 49.497 1.00 57.97  1 . C  ?  
ATOM   3022 NE1  NE1  . TRP TRP TRP A A 382 382 . 98.537  25.545 48.369 1.00 55.20  1 . N  ?  
ATOM   3023 CE2  CE2  . TRP TRP TRP A A 382 382 . 97.441  26.366 48.429 1.00 50.98  1 . C  ?  
ATOM   3024 CE3  CE3  . TRP TRP TRP A A 382 382 . 95.435  26.598 49.770 1.00 56.69  1 . C  ?  
ATOM   3025 CZ2  CZ2  . TRP TRP TRP A A 382 382 . 97.087  27.453 47.633 1.00 52.02  1 . C  ?  
ATOM   3026 CZ3  CZ3  . TRP TRP TRP A A 382 382 . 95.086  27.691 48.975 1.00 49.05  1 . C  ?  
ATOM   3027 CH2  CH2  . TRP TRP TRP A A 382 382 . 95.905  28.102 47.921 1.00 50.54  1 . C  ?  
ATOM   3028 N    N    . PHE PHE PHE A A 383 383 . 96.187  21.442 53.058 1.00 55.90  1 . N  ?  
ATOM   3029 CA   CA   . PHE PHE PHE A A 383 383 . 95.753  20.907 54.341 1.00 60.56  1 . C  ?  
ATOM   3030 C    C    . PHE PHE PHE A A 383 383 . 96.775  19.912 54.895 1.00 59.28  1 . C  ?  
ATOM   3031 O    O    . PHE PHE PHE A A 383 383 . 97.186  20.015 56.057 1.00 60.45  1 . O  ?  
ATOM   3032 CB   CB   . PHE PHE PHE A A 383 383 . 94.366  20.267 54.183 1.00 60.43  1 . C  ?  
ATOM   3033 CG   CG   . PHE PHE PHE A A 383 383 . 93.916  19.507 55.385 1.00 58.87  1 . C  ?  
ATOM   3034 CD1  CD1  . PHE PHE PHE A A 383 383 . 93.445  20.172 56.507 1.00 67.76  1 . C  ?  
ATOM   3035 CD2  CD2  . PHE PHE PHE A A 383 383 . 93.988  18.127 55.401 1.00 61.10  1 . C  ?  
ATOM   3036 CE1  CE1  . PHE PHE PHE A A 383 383 . 93.049  19.469 57.620 1.00 71.46  1 . C  ?  
ATOM   3037 CE2  CE2  . PHE PHE PHE A A 383 383 . 93.601  17.415 56.509 1.00 62.03  1 . C  ?  
ATOM   3038 CZ   CZ   . PHE PHE PHE A A 383 383 . 93.127  18.085 57.620 1.00 68.81  1 . C  ?  
ATOM   3039 N    N    . ILE ILE ILE A A 384 384 . 97.219  18.955 54.070 1.00 53.66  1 . N  ?  
ATOM   3040 CA   CA   . ILE ILE ILE A A 384 384 . 98.231  18.000 54.525 1.00 58.40  1 . C  ?  
ATOM   3041 C    C    . ILE ILE ILE A A 384 384 . 99.514  18.691 54.997 1.00 60.19  1 . C  ?  
ATOM   3042 O    O    . ILE ILE ILE A A 384 384 . 100.215 18.163 55.865 1.00 66.77  1 . O  ?  
ATOM   3043 CB   CB   . ILE ILE ILE A A 384 384 . 98.549  16.959 53.434 1.00 58.17  1 . C  ?  
ATOM   3044 CG1  CG1  . ILE ILE ILE A A 384 384 . 97.404  15.955 53.282 1.00 62.82  1 . C  ?  
ATOM   3045 CG2  CG2  . ILE ILE ILE A A 384 384 . 99.773  16.181 53.818 1.00 54.40  1 . C  ?  
ATOM   3046 CD1  CD1  . ILE ILE ILE A A 384 384 . 96.537  16.196 52.081 1.00 63.15  1 . C  ?  
ATOM   3047 N    N    . GLU GLU GLU A A 385 385 . 99.858  19.858 54.445 1.00 56.67  1 . N  ?  
ATOM   3048 CA   CA   . GLU GLU GLU A A 385 385 . 101.085 20.538 54.855 1.00 51.34  1 . C  ?  
ATOM   3049 C    C    . GLU GLU GLU A A 385 385 . 100.877 21.573 55.943 1.00 53.08  1 . C  ?  
ATOM   3050 O    O    . GLU GLU GLU A A 385 385 . 101.865 22.109 56.453 1.00 59.19  1 . O  ?  
ATOM   3051 CB   CB   . GLU GLU GLU A A 385 385 . 101.748 21.265 53.679 1.00 47.85  1 . C  ?  
ATOM   3052 CG   CG   . GLU GLU GLU A A 385 385 . 102.092 20.413 52.490 1.00 52.22  1 . C  ?  
ATOM   3053 CD   CD   . GLU GLU GLU A A 385 385 . 102.551 21.249 51.299 1.00 53.75  1 . C  ?  
ATOM   3054 OE1  OE1  . GLU GLU GLU A A 385 385 . 102.509 22.492 51.405 1.00 52.85  1 . O  ?  
ATOM   3055 OE2  OE2  . GLU GLU GLU A A 385 385 . 102.940 20.664 50.256 1.00 56.44  1 . O  ?  
ATOM   3056 N    N    . GLY GLY GLY A A 386 386 . 99.638  21.925 56.267 1.00 58.24  1 . N  ?  
ATOM   3057 CA   CA   . GLY GLY GLY A A 386 386 . 99.438  23.047 57.167 1.00 52.15  1 . C  ?  
ATOM   3058 C    C    . GLY GLY GLY A A 386 386 . 99.816  24.382 56.570 1.00 52.70  1 . C  ?  
ATOM   3059 O    O    . GLY GLY GLY A A 386 386 . 100.164 25.314 57.305 1.00 57.11  1 . O  ?  
ATOM   3060 N    N    . TYR TYR TYR A A 387 387 . 99.758  24.504 55.249 1.00 50.44  1 . N  ?  
ATOM   3061 CA   CA   . TYR TYR TYR A A 387 387 . 100.045 25.783 54.606 1.00 54.99  1 . C  ?  
ATOM   3062 C    C    . TYR TYR TYR A A 387 387 . 98.891  26.762 54.800 1.00 52.94  1 . C  ?  
ATOM   3063 O    O    . TYR TYR TYR A A 387 387 . 97.728  26.414 54.589 1.00 61.78  1 . O  ?  
ATOM   3064 CB   CB   . TYR TYR TYR A A 387 387 . 100.302 25.564 53.118 1.00 53.06  1 . C  ?  
ATOM   3065 CG   CG   . TYR TYR TYR A A 387 387 . 100.717 26.799 52.341 1.00 52.18  1 . C  ?  
ATOM   3066 CD1  CD1  . TYR TYR TYR A A 387 387 . 101.771 27.617 52.778 1.00 47.07  1 . C  ?  
ATOM   3067 CD2  CD2  . TYR TYR TYR A A 387 387 . 100.084 27.122 51.143 1.00 48.23  1 . C  ?  
ATOM   3068 CE1  CE1  . TYR TYR TYR A A 387 387 . 102.159 28.728 52.042 1.00 44.11  1 . C  ?  
ATOM   3069 CE2  CE2  . TYR TYR TYR A A 387 387 . 100.467 28.220 50.404 1.00 46.23  1 . C  ?  
ATOM   3070 CZ   CZ   . TYR TYR TYR A A 387 387 . 101.501 29.018 50.853 1.00 46.57  1 . C  ?  
ATOM   3071 OH   OH   . TYR TYR TYR A A 387 387 . 101.860 30.114 50.103 1.00 49.23  1 . O  ?  
ATOM   3072 N    N    . THR THR THR A A 388 388 . 99.216  27.991 55.198 1.00 55.60  1 . N  ?  
ATOM   3073 CA   CA   . THR THR THR A A 388 388 . 98.254  29.082 55.362 1.00 52.76  1 . C  ?  
ATOM   3074 C    C    . THR THR THR A A 388 388 . 98.644  30.206 54.406 1.00 51.77  1 . C  ?  
ATOM   3075 O    O    . THR THR THR A A 388 388 . 99.417  31.111 54.771 1.00 51.33  1 . O  ?  
ATOM   3076 CB   CB   . THR THR THR A A 388 388 . 98.222  29.584 56.805 1.00 57.44  1 . C  ?  
ATOM   3077 OG1  OG1  . THR THR THR A A 388 388 . 97.799  28.525 57.671 1.00 59.61  1 . O  ?  
ATOM   3078 CG2  CG2  . THR THR THR A A 388 388 . 97.261  30.769 56.937 1.00 61.26  1 . C  ?  
ATOM   3079 N    N    . PRO PRO PRO A A 389 389 . 98.130  30.195 53.181 1.00 47.54  1 . N  ?  
ATOM   3080 CA   CA   . PRO PRO PRO A A 389 389 . 98.598  31.152 52.175 1.00 46.61  1 . C  ?  
ATOM   3081 C    C    . PRO PRO PRO A A 389 389 . 98.138  32.568 52.472 1.00 53.05  1 . C  ?  
ATOM   3082 O    O    . PRO PRO PRO A A 389 389 . 97.312  32.811 53.371 1.00 54.02  1 . O  ?  
ATOM   3083 CB   CB   . PRO PRO PRO A A 389 389 . 97.981  30.626 50.868 1.00 45.48  1 . C  ?  
ATOM   3084 CG   CG   . PRO PRO PRO A A 389 389 . 96.878  29.743 51.267 1.00 47.25  1 . C  ?  
ATOM   3085 CD   CD   . PRO PRO PRO A A 389 389 . 97.224  29.183 52.616 1.00 52.34  1 . C  ?  
ATOM   3086 N    N    . PRO PRO PRO A A 390 390 . 98.678  33.541 51.747 1.00 46.26  1 . N  ?  
ATOM   3087 CA   CA   . PRO PRO PRO A A 390 390 . 98.112  34.890 51.773 1.00 50.05  1 . C  ?  
ATOM   3088 C    C    . PRO PRO PRO A A 390 390 . 96.749  34.902 51.097 1.00 49.73  1 . C  ?  
ATOM   3089 O    O    . PRO PRO PRO A A 390 390 . 96.414  34.028 50.289 1.00 45.98  1 . O  ?  
ATOM   3090 CB   CB   . PRO PRO PRO A A 390 390 . 99.126  35.720 50.977 1.00 48.90  1 . C  ?  
ATOM   3091 CG   CG   . PRO PRO PRO A A 390 390 . 100.293 34.801 50.734 1.00 42.59  1 . C  ?  
ATOM   3092 CD   CD   . PRO PRO PRO A A 390 390 . 99.759  33.420 50.765 1.00 43.73  1 . C  ?  
ATOM   3093 N    N    . VAL VAL VAL A A 391 391 . 95.950  35.914 51.439 1.00 50.67  1 . N  ?  
ATOM   3094 CA   CA   . VAL VAL VAL A A 391 391 . 94.578  35.946 50.941 1.00 51.40  1 . C  ?  
ATOM   3095 C    C    . VAL VAL VAL A A 391 391 . 94.566  35.834 49.419 1.00 47.54  1 . C  ?  
ATOM   3096 O    O    . VAL VAL VAL A A 391 391 . 93.831  35.018 48.841 1.00 43.78  1 . O  ?  
ATOM   3097 CB   CB   . VAL VAL VAL A A 391 391 . 93.841  37.207 51.428 1.00 51.32  1 . C  ?  
ATOM   3098 CG1  CG1  . VAL VAL VAL A A 391 391 . 92.493  37.286 50.772 1.00 48.29  1 . C  ?  
ATOM   3099 CG2  CG2  . VAL VAL VAL A A 391 391 . 93.666  37.186 52.944 1.00 52.58  1 . C  ?  
ATOM   3100 N    N    . SER SER SER A A 392 392 . 95.404  36.626 48.747 1.00 43.90  1 . N  ?  
ATOM   3101 CA   CA   . SER SER SER A A 392 392 . 95.411  36.587 47.289 1.00 43.50  1 . C  ?  
ATOM   3102 C    C    . SER SER SER A A 392 392 . 95.634  35.174 46.789 1.00 46.63  1 . C  ?  
ATOM   3103 O    O    . SER SER SER A A 392 392 . 94.926  34.713 45.883 1.00 47.70  1 . O  ?  
ATOM   3104 CB   CB   . SER SER SER A A 392 392 . 96.472  37.535 46.718 1.00 44.40  1 . C  ?  
ATOM   3105 OG   OG   . SER SER SER A A 392 392 . 97.666  37.491 47.468 1.00 53.58  1 . O  ?  
ATOM   3106 N    N    . GLU GLU GLU A A 393 393 . 96.601  34.457 47.380 1.00 42.43  1 . N  ?  
ATOM   3107 CA   CA   . GLU GLU GLU A A 393 393 . 96.877  33.109 46.905 1.00 44.79  1 . C  ?  
ATOM   3108 C    C    . GLU GLU GLU A A 393 393 . 95.737  32.160 47.257 1.00 41.83  1 . C  ?  
ATOM   3109 O    O    . GLU GLU GLU A A 393 393 . 95.358  31.315 46.441 1.00 46.99  1 . O  ?  
ATOM   3110 CB   CB   . GLU GLU GLU A A 393 393 . 98.211  32.579 47.461 1.00 48.34  1 . C  ?  
ATOM   3111 CG   CG   . GLU GLU GLU A A 393 393 . 98.782  31.438 46.589 1.00 48.48  1 . C  ?  
ATOM   3112 CD   CD   . GLU GLU GLU A A 393 393 . 99.762  30.502 47.298 1.00 53.35  1 . C  ?  
ATOM   3113 OE1  OE1  . GLU GLU GLU A A 393 393 . 100.416 30.951 48.276 1.00 45.79  1 . O  ?  
ATOM   3114 OE2  OE2  . GLU GLU GLU A A 393 393 . 99.867  29.313 46.855 1.00 47.12  1 . O  ?  
ATOM   3115 N    N    . TYR TYR TYR A A 394 394 . 95.205  32.257 48.476 1.00 42.67  1 . N  ?  
ATOM   3116 CA   CA   . TYR TYR TYR A A 394 394 . 94.018  31.487 48.838 1.00 41.50  1 . C  ?  
ATOM   3117 C    C    . TYR TYR TYR A A 394 394 . 92.907  31.634 47.797 1.00 43.51  1 . C  ?  
ATOM   3118 O    O    . TYR TYR TYR A A 394 394 . 92.317  30.640 47.354 1.00 43.42  1 . O  ?  
ATOM   3119 CB   CB   . TYR TYR TYR A A 394 394 . 93.524  31.926 50.215 1.00 43.19  1 . C  ?  
ATOM   3120 CG   CG   . TYR TYR TYR A A 394 394 . 92.181  31.346 50.566 1.00 50.26  1 . C  ?  
ATOM   3121 CD1  CD1  . TYR TYR TYR A A 394 394 . 92.048  29.986 50.831 1.00 46.69  1 . C  ?  
ATOM   3122 CD2  CD2  . TYR TYR TYR A A 394 394 . 91.042  32.151 50.636 1.00 44.42  1 . C  ?  
ATOM   3123 CE1  CE1  . TYR TYR TYR A A 394 394 . 90.830  29.440 51.150 1.00 46.98  1 . C  ?  
ATOM   3124 CE2  CE2  . TYR TYR TYR A A 394 394 . 89.819  31.614 50.965 1.00 45.10  1 . C  ?  
ATOM   3125 CZ   CZ   . TYR TYR TYR A A 394 394 . 89.716  30.249 51.211 1.00 52.46  1 . C  ?  
ATOM   3126 OH   OH   . TYR TYR TYR A A 394 394 . 88.502  29.679 51.531 1.00 52.64  1 . O  ?  
ATOM   3127 N    N    . LEU LEU LEU A A 395 395 . 92.618  32.872 47.382 1.00 41.84  1 . N  ?  
ATOM   3128 CA   CA   . LEU LEU LEU A A 395 395 . 91.491  33.111 46.483 1.00 42.54  1 . C  ?  
ATOM   3129 C    C    . LEU LEU LEU A A 395 395 . 91.756  32.557 45.092 1.00 40.98  1 . C  ?  
ATOM   3130 O    O    . LEU LEU LEU A A 395 395 . 90.839  32.038 44.436 1.00 39.98  1 . O  ?  
ATOM   3131 CB   CB   . LEU LEU LEU A A 395 395 . 91.176  34.610 46.403 1.00 40.48  1 . C  ?  
ATOM   3132 CG   CG   . LEU LEU LEU A A 395 395 . 90.520  35.215 47.641 1.00 40.20  1 . C  ?  
ATOM   3133 CD1  CD1  . LEU LEU LEU A A 395 395 . 90.263  36.699 47.456 1.00 37.05  1 . C  ?  
ATOM   3134 CD2  CD2  . LEU LEU LEU A A 395 395 . 89.223  34.469 47.942 1.00 43.13  1 . C  ?  
ATOM   3135 N    N    . SER SER SER A A 396 396 . 92.992  32.677 44.608 1.00 40.91  1 . N  ?  
ATOM   3136 CA   CA   . SER SER SER A A 396 396 . 93.284  32.172 43.276 1.00 36.81  1 . C  ?  
ATOM   3137 C    C    . SER SER SER A A 396 396 . 93.033  30.681 43.189 1.00 39.95  1 . C  ?  
ATOM   3138 O    O    . SER SER SER A A 396 396 . 92.826  30.165 42.084 1.00 42.99  1 . O  ?  
ATOM   3139 CB   CB   . SER SER SER A A 396 396 . 94.722  32.489 42.885 1.00 39.32  1 . C  ?  
ATOM   3140 OG   OG   . SER SER SER A A 396 396 . 95.608  31.879 43.795 1.00 46.20  1 . O  ?  
ATOM   3141 N    N    . ASN ASN ASN A A 397 397 . 93.017  29.980 44.327 1.00 36.25  1 . N  ?  
ATOM   3142 CA   CA   . ASN ASN ASN A A 397 397 . 92.609  28.578 44.321 1.00 45.97  1 . C  ?  
ATOM   3143 C    C    . ASN ASN ASN A A 397 397 . 91.168  28.370 44.800 1.00 43.44  1 . C  ?  
ATOM   3144 O    O    . ASN ASN ASN A A 397 397 . 90.421  27.599 44.185 1.00 39.61  1 . O  ?  
ATOM   3145 CB   CB   . ASN ASN ASN A A 397 397 . 93.578  27.721 45.166 1.00 40.33  1 . C  ?  
ATOM   3146 CG   CG   . ASN ASN ASN A A 397 397 . 93.203  26.250 45.153 1.00 47.23  1 . C  ?  
ATOM   3147 OD1  OD1  . ASN ASN ASN A A 397 397 . 93.396  25.559 44.149 1.00 50.57  1 . O  ?  
ATOM   3148 ND2  ND2  . ASN ASN ASN A A 397 397 . 92.625  25.769 46.255 1.00 46.72  1 . N  ?  
ATOM   3149 N    N    . ALA ALA ALA A A 398 398 . 90.748  29.066 45.863 1.00 45.47  1 . N  ?  
ATOM   3150 CA   CA   . ALA ALA ALA A A 398 398 . 89.472  28.780 46.510 1.00 43.92  1 . C  ?  
ATOM   3151 C    C    . ALA ALA ALA A A 398 398 . 88.273  29.361 45.766 1.00 46.32  1 . C  ?  
ATOM   3152 O    O    . ALA ALA ALA A A 398 398 . 87.144  28.916 46.011 1.00 47.42  1 . O  ?  
ATOM   3153 CB   CB   . ALA ALA ALA A A 398 398 . 89.486  29.299 47.954 1.00 41.93  1 . C  ?  
ATOM   3154 N    N    . LEU LEU LEU A A 399 399 . 88.467  30.338 44.873 1.00 40.81  1 . N  ?  
ATOM   3155 CA   CA   . LEU LEU LEU A A 399 399 . 87.336  30.790 44.072 1.00 38.02  1 . C  ?  
ATOM   3156 C    C    . LEU LEU LEU A A 399 399 . 86.759  29.640 43.262 1.00 39.72  1 . C  ?  
ATOM   3157 O    O    . LEU LEU LEU A A 399 399 . 85.548  29.393 43.289 1.00 38.62  1 . O  ?  
ATOM   3158 CB   CB   . LEU LEU LEU A A 399 399 . 87.725  31.955 43.168 1.00 33.95  1 . C  ?  
ATOM   3159 CG   CG   . LEU LEU LEU A A 399 399 . 88.066  33.252 43.919 1.00 38.66  1 . C  ?  
ATOM   3160 CD1  CD1  . LEU LEU LEU A A 399 399 . 88.352  34.368 42.946 1.00 34.91  1 . C  ?  
ATOM   3161 CD2  CD2  . LEU LEU LEU A A 399 399 . 86.993  33.680 44.894 1.00 38.62  1 . C  ?  
ATOM   3162 N    N    . ALA ALA ALA A A 400 400 . 87.607  28.896 42.558 1.00 41.95  1 . N  ?  
ATOM   3163 CA   CA   . ALA ALA ALA A A 400 400 . 87.055  27.810 41.757 1.00 41.99  1 . C  ?  
ATOM   3164 C    C    . ALA ALA ALA A A 400 400 . 86.555  26.645 42.599 1.00 39.54  1 . C  ?  
ATOM   3165 O    O    . ALA ALA ALA A A 400 400 . 85.688  25.908 42.124 1.00 43.22  1 . O  ?  
ATOM   3166 CB   CB   . ALA ALA ALA A A 400 400 . 88.061  27.315 40.724 1.00 36.84  1 . C  ?  
ATOM   3167 N    N    . THR THR THR A A 401 401 . 87.036  26.464 43.835 1.00 38.54  1 . N  ?  
ATOM   3168 CA   CA   . THR THR THR A A 401 401 . 86.498  25.340 44.604 1.00 41.02  1 . C  ?  
ATOM   3169 C    C    . THR THR THR A A 401 401 . 85.103  25.618 45.161 1.00 45.48  1 . C  ?  
ATOM   3170 O    O    . THR THR THR A A 401 401 . 84.569  24.773 45.891 1.00 47.04  1 . O  ?  
ATOM   3171 CB   CB   . THR THR THR A A 401 401 . 87.438  24.912 45.749 1.00 43.42  1 . C  ?  
ATOM   3172 OG1  OG1  . THR THR THR A A 401 401 . 87.495  25.903 46.780 1.00 40.79  1 . O  ?  
ATOM   3173 CG2  CG2  . THR THR THR A A 401 401 . 88.851  24.616 45.227 1.00 38.79  1 . C  ?  
ATOM   3174 N    N    . THR THR THR A A 402 402 . 84.507  26.775 44.845 1.00 41.01  1 . N  ?  
ATOM   3175 CA   CA   . THR THR THR A A 402 402 . 83.074  26.957 45.040 1.00 40.94  1 . C  ?  
ATOM   3176 C    C    . THR THR THR A A 402 402 . 82.258  26.151 44.045 1.00 39.38  1 . C  ?  
ATOM   3177 O    O    . THR THR THR A A 402 402 . 81.068  25.936 44.274 1.00 42.34  1 . O  ?  
ATOM   3178 CB   CB   . THR THR THR A A 402 402 . 82.667  28.422 44.879 1.00 39.17  1 . C  ?  
ATOM   3179 OG1  OG1  . THR THR THR A A 402 402 . 82.846  28.814 43.512 1.00 35.66  1 . O  ?  
ATOM   3180 CG2  CG2  . THR THR THR A A 402 402 . 83.449  29.336 45.799 1.00 39.52  1 . C  ?  
ATOM   3181 N    N    . THR THR THR A A 403 403 . 82.863  25.725 42.939 1.00 40.13  1 . N  ?  
ATOM   3182 CA   CA   . THR THR THR A A 403 403 . 82.196  25.094 41.801 1.00 43.92  1 . C  ?  
ATOM   3183 C    C    . THR THR THR A A 403 403 . 81.372  26.079 40.984 1.00 40.73  1 . C  ?  
ATOM   3184 O    O    . THR THR THR A A 403 403 . 80.634  25.654 40.096 1.00 41.33  1 . O  ?  
ATOM   3185 CB   CB   . THR THR THR A A 403 403 . 81.271  23.927 42.205 1.00 45.78  1 . C  ?  
ATOM   3186 OG1  OG1  . THR THR THR A A 403 403 . 80.028  24.452 42.693 1.00 40.87  1 . O  ?  
ATOM   3187 CG2  CG2  . THR THR THR A A 403 403 . 81.913  23.035 43.268 1.00 39.02  1 . C  ?  
ATOM   3188 N    N    . TYR TYR TYR A A 404 404 . 81.488  27.384 41.234 1.00 42.11  1 . N  ?  
ATOM   3189 CA   CA   . TYR TYR TYR A A 404 404 . 80.530  28.305 40.628 1.00 41.89  1 . C  ?  
ATOM   3190 C    C    . TYR TYR TYR A A 404 404 . 80.863  28.664 39.177 1.00 42.68  1 . C  ?  
ATOM   3191 O    O    . TYR TYR TYR A A 404 404 . 79.936  28.883 38.385 1.00 39.09  1 . O  ?  
ATOM   3192 CB   CB   . TYR TYR TYR A A 404 404 . 80.382  29.560 41.498 1.00 42.15  1 . C  ?  
ATOM   3193 CG   CG   . TYR TYR TYR A A 404 404 . 79.119  29.515 42.339 1.00 43.59  1 . C  ?  
ATOM   3194 CD1  CD1  . TYR TYR TYR A A 404 404 . 78.691  28.313 42.907 1.00 40.36  1 . C  ?  
ATOM   3195 CD2  CD2  . TYR TYR TYR A A 404 404 . 78.339  30.657 42.546 1.00 38.43  1 . C  ?  
ATOM   3196 CE1  CE1  . TYR TYR TYR A A 404 404 . 77.538  28.253 43.659 1.00 43.79  1 . C  ?  
ATOM   3197 CE2  CE2  . TYR TYR TYR A A 404 404 . 77.180  30.605 43.305 1.00 34.32  1 . C  ?  
ATOM   3198 CZ   CZ   . TYR TYR TYR A A 404 404 . 76.780  29.403 43.855 1.00 41.96  1 . C  ?  
ATOM   3199 OH   OH   . TYR TYR TYR A A 404 404 . 75.620  29.320 44.599 1.00 38.86  1 . O  ?  
ATOM   3200 N    N    . TYR TYR TYR A A 405 405 . 82.146  28.726 38.789 1.00 41.42  1 . N  ?  
ATOM   3201 CA   CA   . TYR TYR TYR A A 405 405 . 82.439  28.794 37.355 1.00 41.61  1 . C  ?  
ATOM   3202 C    C    . TYR TYR TYR A A 405 405 . 81.939  27.536 36.658 1.00 42.37  1 . C  ?  
ATOM   3203 O    O    . TYR TYR TYR A A 405 405 . 81.463  27.575 35.513 1.00 41.30  1 . O  ?  
ATOM   3204 CB   CB   . TYR TYR TYR A A 405 405 . 83.934  28.930 37.086 1.00 38.79  1 . C  ?  
ATOM   3205 CG   CG   . TYR TYR TYR A A 405 405 . 84.690  30.019 37.805 1.00 40.67  1 . C  ?  
ATOM   3206 CD1  CD1  . TYR TYR TYR A A 405 405 . 84.682  31.333 37.338 1.00 40.67  1 . C  ?  
ATOM   3207 CD2  CD2  . TYR TYR TYR A A 405 405 . 85.478  29.718 38.900 1.00 39.44  1 . C  ?  
ATOM   3208 CE1  CE1  . TYR TYR TYR A A 405 405 . 85.403  32.316 37.973 1.00 38.46  1 . C  ?  
ATOM   3209 CE2  CE2  . TYR TYR TYR A A 405 405 . 86.198  30.693 39.540 1.00 42.45  1 . C  ?  
ATOM   3210 CZ   CZ   . TYR TYR TYR A A 405 405 . 86.159  31.988 39.075 1.00 39.12  1 . C  ?  
ATOM   3211 OH   OH   . TYR TYR TYR A A 405 405 . 86.879  32.944 39.730 1.00 39.26  1 . O  ?  
ATOM   3212 N    N    . TYR TYR TYR A A 406 406 . 82.055  26.407 37.340 1.00 38.76  1 . N  ?  
ATOM   3213 CA   CA   . TYR TYR TYR A A 406 406 . 81.626  25.141 36.769 1.00 44.13  1 . C  ?  
ATOM   3214 C    C    . TYR TYR TYR A A 406 406 . 80.095  25.084 36.624 1.00 42.52  1 . C  ?  
ATOM   3215 O    O    . TYR TYR TYR A A 406 406 . 79.573  24.789 35.540 1.00 39.94  1 . O  ?  
ATOM   3216 CB   CB   . TYR TYR TYR A A 406 406 . 82.211  24.028 37.643 1.00 43.60  1 . C  ?  
ATOM   3217 CG   CG   . TYR TYR TYR A A 406 406 . 81.799  22.636 37.304 1.00 43.25  1 . C  ?  
ATOM   3218 CD1  CD1  . TYR TYR TYR A A 406 406 . 81.801  22.188 35.994 1.00 43.13  1 . C  ?  
ATOM   3219 CD2  CD2  . TYR TYR TYR A A 406 406 . 81.425  21.755 38.308 1.00 40.61  1 . C  ?  
ATOM   3220 CE1  CE1  . TYR TYR TYR A A 406 406 . 81.418  20.890 35.693 1.00 46.91  1 . C  ?  
ATOM   3221 CE2  CE2  . TYR TYR TYR A A 406 406 . 81.044  20.460 38.021 1.00 46.06  1 . C  ?  
ATOM   3222 CZ   CZ   . TYR TYR TYR A A 406 406 . 81.041  20.035 36.715 1.00 44.09  1 . C  ?  
ATOM   3223 OH   OH   . TYR TYR TYR A A 406 406 . 80.658  18.755 36.440 1.00 43.12  1 . O  ?  
ATOM   3224 N    N    . LEU LEU LEU A A 407 407 . 79.353  25.442 37.679 1.00 43.54  1 . N  ?  
ATOM   3225 CA   CA   . LEU LEU LEU A A 407 407 . 77.891  25.387 37.589 1.00 43.90  1 . C  ?  
ATOM   3226 C    C    . LEU LEU LEU A A 407 407 . 77.341  26.428 36.624 1.00 43.80  1 . C  ?  
ATOM   3227 O    O    . LEU LEU LEU A A 407 407 . 76.315  26.193 35.970 1.00 44.91  1 . O  ?  
ATOM   3228 CB   CB   . LEU LEU LEU A A 407 407 . 77.244  25.580 38.960 1.00 41.77  1 . C  ?  
ATOM   3229 CG   CG   . LEU LEU LEU A A 407 407 . 77.583  24.602 40.078 1.00 43.90  1 . C  ?  
ATOM   3230 CD1  CD1  . LEU LEU LEU A A 407 407 . 76.633  24.839 41.242 1.00 42.53  1 . C  ?  
ATOM   3231 CD2  CD2  . LEU LEU LEU A A 407 407 . 77.536  23.152 39.582 1.00 41.30  1 . C  ?  
ATOM   3232 N    N    . ALA ALA ALA A A 408 408 . 77.981  27.590 36.532 1.00 40.59  1 . N  ?  
ATOM   3233 CA   CA   . ALA ALA ALA A A 408 408 . 77.491  28.586 35.593 1.00 41.62  1 . C  ?  
ATOM   3234 C    C    . ALA ALA ALA A A 408 408 . 77.669  28.096 34.163 1.00 39.89  1 . C  ?  
ATOM   3235 O    O    . ALA ALA ALA A A 408 408 . 76.767  28.221 33.330 1.00 43.42  1 . O  ?  
ATOM   3236 CB   CB   . ALA ALA ALA A A 408 408 . 78.198  29.926 35.826 1.00 42.67  1 . C  ?  
ATOM   3237 N    N    . THR THR THR A A 409 409 . 78.824  27.518 33.860 1.00 43.99  1 . N  ?  
ATOM   3238 CA   CA   . THR THR THR A A 409 409 . 79.004  26.911 32.548 1.00 46.49  1 . C  ?  
ATOM   3239 C    C    . THR THR THR A A 409 409 . 77.974  25.812 32.315 1.00 41.62  1 . C  ?  
ATOM   3240 O    O    . THR THR THR A A 409 409 . 77.313  25.776 31.271 1.00 41.06  1 . O  ?  
ATOM   3241 CB   CB   . THR THR THR A A 409 409 . 80.421  26.363 32.417 1.00 43.69  1 . C  ?  
ATOM   3242 OG1  OG1  . THR THR THR A A 409 409 . 81.336  27.374 32.859 1.00 42.64  1 . O  ?  
ATOM   3243 CG2  CG2  . THR THR THR A A 409 409 . 80.696  26.013 30.979 1.00 42.19  1 . C  ?  
ATOM   3244 N    N    . THR THR THR A A 410 410 . 77.809  24.917 33.290 1.00 41.51  1 . N  ?  
ATOM   3245 CA   CA   . THR THR THR A A 410 410 . 76.788  23.879 33.170 1.00 41.05  1 . C  ?  
ATOM   3246 C    C    . THR THR THR A A 410 410 . 75.411  24.464 32.870 1.00 41.59  1 . C  ?  
ATOM   3247 O    O    . THR THR THR A A 410 410 . 74.682  23.934 32.026 1.00 42.80  1 . O  ?  
ATOM   3248 CB   CB   . THR THR THR A A 410 410 . 76.710  23.058 34.447 1.00 39.82  1 . C  ?  
ATOM   3249 OG1  OG1  . THR THR THR A A 410 410 . 78.002  22.517 34.753 1.00 41.30  1 . O  ?  
ATOM   3250 CG2  CG2  . THR THR THR A A 410 410 . 75.662  21.948 34.275 1.00 39.90  1 . C  ?  
ATOM   3251 N    N    . SER SER SER A A 411 411 . 75.036  25.560 33.542 1.00 36.18  1 . N  ?  
ATOM   3252 CA   CA   . SER SER SER A A 411 411 . 73.663  26.057 33.415 1.00 41.02  1 . C  ?  
ATOM   3253 C    C    . SER SER SER A A 411 411 . 73.288  26.333 31.964 1.00 40.19  1 . C  ?  
ATOM   3254 O    O    . SER SER SER A A 411 411 . 72.101  26.265 31.610 1.00 41.67  1 . O  ?  
ATOM   3255 CB   CB   . SER SER SER A A 411 411 . 73.459  27.314 34.269 1.00 41.03  1 . C  ?  
ATOM   3256 OG   OG   . SER SER SER A A 411 411 . 74.016  28.479 33.655 1.00 39.92  1 . O  ?  
ATOM   3257 N    N    . TYR TYR TYR A A 412 412 . 74.282  26.625 31.112 1.00 41.13  1 . N  ?  
ATOM   3258 CA   CA   . TYR TYR TYR A A 412 412 . 74.058  26.913 29.696 1.00 40.20  1 . C  ?  
ATOM   3259 C    C    . TYR TYR TYR A A 412 412 . 73.843  25.659 28.845 1.00 46.82  1 . C  ?  
ATOM   3260 O    O    . TYR TYR TYR A A 412 412 . 73.274  25.770 27.748 1.00 48.34  1 . O  ?  
ATOM   3261 CB   CB   . TYR TYR TYR A A 412 412 . 75.246  27.690 29.103 1.00 40.13  1 . C  ?  
ATOM   3262 CG   CG   . TYR TYR TYR A A 412 412 . 75.457  29.123 29.584 1.00 44.62  1 . C  ?  
ATOM   3263 CD1  CD1  . TYR TYR TYR A A 412 412 . 74.659  29.693 30.573 1.00 43.06  1 . C  ?  
ATOM   3264 CD2  CD2  . TYR TYR TYR A A 412 412 . 76.465  29.910 29.030 1.00 44.17  1 . C  ?  
ATOM   3265 CE1  CE1  . TYR TYR TYR A A 412 412 . 74.877  31.011 31.002 1.00 40.43  1 . C  ?  
ATOM   3266 CE2  CE2  . TYR TYR TYR A A 412 412 . 76.686  31.217 29.449 1.00 41.01  1 . C  ?  
ATOM   3267 CZ   CZ   . TYR TYR TYR A A 412 412 . 75.898  31.759 30.433 1.00 43.60  1 . C  ?  
ATOM   3268 OH   OH   . TYR TYR TYR A A 412 412 . 76.130  33.058 30.834 1.00 44.60  1 . O  ?  
ATOM   3269 N    N    . LEU LEU LEU A A 413 413 . 74.304  24.484 29.303 1.00 39.32  1 . N  ?  
ATOM   3270 CA   CA   . LEU LEU LEU A A 413 413 . 74.269  23.283 28.469 1.00 46.37  1 . C  ?  
ATOM   3271 C    C    . LEU LEU LEU A A 413 413 . 72.886  23.054 27.891 1.00 51.16  1 . C  ?  
ATOM   3272 O    O    . LEU LEU LEU A A 413 413 . 72.732  22.828 26.684 1.00 53.63  1 . O  ?  
ATOM   3273 CB   CB   . LEU LEU LEU A A 413 413 . 74.702  22.052 29.271 1.00 43.57  1 . C  ?  
ATOM   3274 CG   CG   . LEU LEU LEU A A 413 413 . 76.151  22.080 29.754 1.00 46.80  1 . C  ?  
ATOM   3275 CD1  CD1  . LEU LEU LEU A A 413 413 . 76.515  20.769 30.438 1.00 47.76  1 . C  ?  
ATOM   3276 CD2  CD2  . LEU LEU LEU A A 413 413 . 77.084  22.379 28.585 1.00 45.73  1 . C  ?  
ATOM   3277 N    N    . GLY GLY GLY A A 414 414 . 71.863  23.110 28.745 1.00 47.84  1 . N  ?  
ATOM   3278 CA   CA   . GLY GLY GLY A A 414 414 . 70.509  22.826 28.337 1.00 46.85  1 . C  ?  
ATOM   3279 C    C    . GLY GLY GLY A A 414 414 . 69.731  23.985 27.767 1.00 49.46  1 . C  ?  
ATOM   3280 O    O    . GLY GLY GLY A A 414 414 . 68.556  23.810 27.432 1.00 51.91  1 . O  ?  
ATOM   3281 N    N    . MET MET MET A A 415 415 . 70.327  25.168 27.635 1.00 47.53  1 . N  ?  
ATOM   3282 CA   CA   . MET MET MET A A 415 415 . 69.605  26.327 27.116 1.00 50.52  1 . C  ?  
ATOM   3283 C    C    . MET MET MET A A 415 415 . 69.778  26.347 25.602 1.00 52.76  1 . C  ?  
ATOM   3284 O    O    . MET MET MET A A 415 415 . 70.875  26.595 25.101 1.00 56.90  1 . O  ?  
ATOM   3285 CB   CB   . MET MET MET A A 415 415 . 70.105  27.620 27.760 1.00 51.68  1 . C  ?  
ATOM   3286 CG   CG   . MET MET MET A A 415 415 . 70.110  27.614 29.291 1.00 48.32  1 . C  ?  
ATOM   3287 SD   SD   . MET MET MET A A 415 415 . 70.811  29.110 30.043 1.00 48.88  1 . S  ?  
ATOM   3288 CE   CE   . MET MET MET A A 415 415 . 69.684  30.386 29.459 1.00 44.59  1 . C  ?  
ATOM   3289 N    N    . LYS LYS LYS A A 416 416 . 68.697  26.082 24.872 1.00 54.85  1 . N  ?  
ATOM   3290 CA   CA   . LYS LYS LYS A A 416 416 . 68.822  25.889 23.431 1.00 56.26  1 . C  ?  
ATOM   3291 C    C    . LYS LYS LYS A A 416 416 . 69.415  27.113 22.746 1.00 59.06  1 . C  ?  
ATOM   3292 O    O    . LYS LYS LYS A A 416 416 . 70.147  26.978 21.758 1.00 67.09  1 . O  ?  
ATOM   3293 CB   CB   . LYS LYS LYS A A 416 416 . 67.461  25.535 22.841 1.00 57.65  1 . C  ?  
ATOM   3294 CG   CG   . LYS LYS LYS A A 416 416 . 66.509  24.950 23.888 1.00 63.36  1 . C  ?  
ATOM   3295 CD   CD   . LYS LYS LYS A A 416 416 . 65.860  23.644 23.435 1.00 67.91  1 . C  ?  
ATOM   3296 CE   CE   . LYS LYS LYS A A 416 416 . 65.313  22.854 24.626 1.00 65.64  1 . C  ?  
ATOM   3297 NZ   NZ   . LYS LYS LYS A A 416 416 . 64.687  21.559 24.229 1.00 67.36  1 . N  ?  
ATOM   3298 N    N    . SER SER SER A A 417 417 . 69.149  28.306 23.267 1.00 56.58  1 . N  ?  
ATOM   3299 CA   CA   . SER SER SER A A 417 417 . 69.666  29.521 22.649 1.00 57.17  1 . C  ?  
ATOM   3300 C    C    . SER SER SER A A 417 417 . 71.136  29.789 22.958 1.00 51.64  1 . C  ?  
ATOM   3301 O    O    . SER SER SER A A 417 417 . 71.735  30.654 22.314 1.00 58.40  1 . O  ?  
ATOM   3302 CB   CB   . SER SER SER A A 417 417 . 68.820  30.717 23.083 1.00 55.09  1 . C  ?  
ATOM   3303 OG   OG   . SER SER SER A A 417 417 . 68.737  30.764 24.495 1.00 59.49  1 . O  ?  
ATOM   3304 N    N    . ALA ALA ALA A A 418 418 . 71.733  29.091 23.914 1.00 52.94  1 . N  ?  
ATOM   3305 CA   CA   . ALA ALA ALA A A 418 418 . 73.147  29.298 24.204 1.00 58.27  1 . C  ?  
ATOM   3306 C    C    . ALA ALA ALA A A 418 418 . 73.993  29.016 22.968 1.00 61.59  1 . C  ?  
ATOM   3307 O    O    . ALA ALA ALA A A 418 418 . 73.993  27.890 22.456 1.00 65.96  1 . O  ?  
ATOM   3308 CB   CB   . ALA ALA ALA A A 418 418 . 73.584  28.397 25.357 1.00 54.93  1 . C  ?  
ATOM   3309 N    N    . THR THR THR A A 419 419 . 74.711  30.034 22.494 1.00 58.44  1 . N  ?  
ATOM   3310 CA   CA   . THR THR THR A A 419 419 . 75.649  29.900 21.387 1.00 58.47  1 . C  ?  
ATOM   3311 C    C    . THR THR THR A A 419 419 . 77.077  29.754 21.905 1.00 61.38  1 . C  ?  
ATOM   3312 O    O    . THR THR THR A A 419 419 . 77.364  29.936 23.091 1.00 60.58  1 . O  ?  
ATOM   3313 CB   CB   . THR THR THR A A 419 419 . 75.574  31.106 20.448 1.00 57.51  1 . C  ?  
ATOM   3314 OG1  OG1  . THR THR THR A A 419 419 . 76.275  32.202 21.039 1.00 62.16  1 . O  ?  
ATOM   3315 CG2  CG2  . THR THR THR A A 419 419 . 74.137  31.512 20.200 1.00 57.53  1 . C  ?  
ATOM   3316 N    N    . GLU GLU GLU A A 420 420 . 77.989  29.439 20.980 1.00 65.70  1 . N  ?  
ATOM   3317 CA   CA   . GLU GLU GLU A A 420 420 . 79.393  29.264 21.346 1.00 64.60  1 . C  ?  
ATOM   3318 C    C    . GLU GLU GLU A A 420 420 . 80.033  30.570 21.800 1.00 60.74  1 . C  ?  
ATOM   3319 O    O    . GLU GLU GLU A A 420 420 . 80.932  30.560 22.647 1.00 56.85  1 . O  ?  
ATOM   3320 CB   CB   . GLU GLU GLU A A 420 420 . 80.174  28.693 20.168 1.00 66.18  1 . C  ?  
ATOM   3321 CG   CG   . GLU GLU GLU A A 420 420 . 81.599  28.323 20.515 1.00 68.11  1 . C  ?  
ATOM   3322 CD   CD   . GLU GLU GLU A A 420 420 . 81.693  26.948 21.152 1.00 69.13  1 . C  ?  
ATOM   3323 OE1  OE1  . GLU GLU GLU A A 420 420 . 80.766  26.134 20.940 1.00 69.41  1 . O  ?  
ATOM   3324 OE2  OE2  . GLU GLU GLU A A 420 420 . 82.686  26.685 21.865 1.00 69.19  1 . O  ?  
ATOM   3325 N    N    . GLN GLN GLN A A 421 421 . 79.594  31.699 21.245 1.00 58.42  1 . N  ?  
ATOM   3326 CA   CA   . GLN GLN GLN A A 421 421 . 80.116  32.982 21.696 1.00 60.75  1 . C  ?  
ATOM   3327 C    C    . GLN GLN GLN A A 421 421 . 79.678  33.286 23.124 1.00 61.31  1 . C  ?  
ATOM   3328 O    O    . GLN GLN GLN A A 421 421 . 80.370  34.023 23.843 1.00 55.45  1 . O  ?  
ATOM   3329 CB   CB   . GLN GLN GLN A A 421 421 . 79.674  34.095 20.743 1.00 59.62  1 . C  ?  
ATOM   3330 CG   CG   . GLN GLN GLN A A 421 421 . 80.148  33.922 19.297 1.00 62.28  1 . C  ?  
ATOM   3331 CD   CD   . GLN GLN GLN A A 421 421 . 79.589  32.664 18.628 1.00 74.67  1 . C  ?  
ATOM   3332 OE1  OE1  . GLN GLN GLN A A 421 421 . 78.399  32.358 18.741 1.00 68.51  1 . O  ?  
ATOM   3333 NE2  NE2  . GLN GLN GLN A A 421 421 . 80.460  31.916 17.949 1.00 80.54  1 . N  ?  
ATOM   3334 N    N    . ASP ASP ASP A A 422 422 . 78.539  32.722 23.554 1.00 60.91  1 . N  ?  
ATOM   3335 CA   CA   . ASP ASP ASP A A 422 422 . 78.116  32.878 24.941 1.00 54.30  1 . C  ?  
ATOM   3336 C    C    . ASP ASP ASP A A 422 422 . 79.063  32.144 25.876 1.00 52.23  1 . C  ?  
ATOM   3337 O    O    . ASP ASP ASP A A 422 422 . 79.422  32.666 26.937 1.00 52.08  1 . O  ?  
ATOM   3338 CB   CB   . ASP ASP ASP A A 422 422 . 76.677  32.378 25.124 1.00 54.11  1 . C  ?  
ATOM   3339 CG   CG   . ASP ASP ASP A A 422 422 . 75.642  33.281 24.450 1.00 55.79  1 . C  ?  
ATOM   3340 OD1  OD1  . ASP ASP ASP A A 422 422 . 75.838  34.514 24.436 1.00 54.77  1 . O  ?  
ATOM   3341 OD2  OD2  . ASP ASP ASP A A 422 422 . 74.624  32.758 23.937 1.00 59.94  1 . O  ?  
ATOM   3342 N    N    . PHE PHE PHE A A 423 423 . 79.485  30.932 25.499 1.00 50.57  1 . N  ?  
ATOM   3343 CA   CA   . PHE PHE PHE A A 423 423 . 80.474  30.208 26.292 1.00 48.26  1 . C  ?  
ATOM   3344 C    C    . PHE PHE PHE A A 423 423 . 81.837  30.881 26.236 1.00 50.62  1 . C  ?  
ATOM   3345 O    O    . PHE PHE PHE A A 423 423 . 82.581  30.853 27.226 1.00 51.03  1 . O  ?  
ATOM   3346 CB   CB   . PHE PHE PHE A A 423 423 . 80.606  28.761 25.811 1.00 48.44  1 . C  ?  
ATOM   3347 CG   CG   . PHE PHE PHE A A 423 423 . 79.449  27.885 26.180 1.00 45.71  1 . C  ?  
ATOM   3348 CD1  CD1  . PHE PHE PHE A A 423 423 . 79.444  27.197 27.381 1.00 43.73  1 . C  ?  
ATOM   3349 CD2  CD2  . PHE PHE PHE A A 423 423 . 78.378  27.729 25.316 1.00 47.48  1 . C  ?  
ATOM   3350 CE1  CE1  . PHE PHE PHE A A 423 423 . 78.396  26.370 27.719 1.00 46.92  1 . C  ?  
ATOM   3351 CE2  CE2  . PHE PHE PHE A A 423 423 . 77.314  26.912 25.647 1.00 49.83  1 . C  ?  
ATOM   3352 CZ   CZ   . PHE PHE PHE A A 423 423 . 77.318  26.230 26.853 1.00 50.87  1 . C  ?  
ATOM   3353 N    N    . GLU GLU GLU A A 424 424 . 82.202  31.462 25.089 1.00 48.55  1 . N  ?  
ATOM   3354 CA   CA   . GLU GLU GLU A A 424 424 . 83.463  32.191 25.040 1.00 53.89  1 . C  ?  
ATOM   3355 C    C    . GLU GLU GLU A A 424 424 . 83.473  33.270 26.101 1.00 49.55  1 . C  ?  
ATOM   3356 O    O    . GLU GLU GLU A A 424 424 . 84.414  33.368 26.899 1.00 45.19  1 . O  ?  
ATOM   3357 CB   CB   . GLU GLU GLU A A 424 424 . 83.693  32.797 23.656 1.00 56.86  1 . C  ?  
ATOM   3358 CG   CG   . GLU GLU GLU A A 424 424 . 84.499  31.922 22.716 1.00 64.64  1 . C  ?  
ATOM   3359 CD   CD   . GLU GLU GLU A A 424 424 . 84.024  32.029 21.272 1.00 75.35  1 . C  ?  
ATOM   3360 OE1  OE1  . GLU GLU GLU A A 424 424 . 83.739  33.165 20.813 1.00 72.78  1 . O  ?  
ATOM   3361 OE2  OE2  . GLU GLU GLU A A 424 424 . 83.927  30.970 20.601 1.00 76.89  1 . O  ?  
ATOM   3362 N    N    . TRP TRP TRP A A 425 425 . 82.397  34.059 26.152 1.00 47.69  1 . N  ?  
ATOM   3363 CA   CA   . TRP TRP TRP A A 425 425 . 82.303  35.138 27.127 1.00 44.93  1 . C  ?  
ATOM   3364 C    C    . TRP TRP TRP A A 425 425 . 82.473  34.610 28.539 1.00 44.92  1 . C  ?  
ATOM   3365 O    O    . TRP TRP TRP A A 425 425 . 83.222  35.176 29.345 1.00 46.33  1 . O  ?  
ATOM   3366 CB   CB   . TRP TRP TRP A A 425 425 . 80.965  35.842 26.979 1.00 45.46  1 . C  ?  
ATOM   3367 CG   CG   . TRP TRP TRP A A 425 425 . 80.691  36.848 28.042 1.00 45.71  1 . C  ?  
ATOM   3368 CD1  CD1  . TRP TRP TRP A A 425 425 . 81.154  38.126 28.097 1.00 38.92  1 . C  ?  
ATOM   3369 CD2  CD2  . TRP TRP TRP A A 425 425 . 79.859  36.670 29.194 1.00 45.02  1 . C  ?  
ATOM   3370 NE1  NE1  . TRP TRP TRP A A 425 425 . 80.675  38.754 29.215 1.00 42.02  1 . N  ?  
ATOM   3371 CE2  CE2  . TRP TRP TRP A A 425 425 . 79.866  37.889 29.903 1.00 42.51  1 . C  ?  
ATOM   3372 CE3  CE3  . TRP TRP TRP A A 425 425 . 79.096  35.607 29.683 1.00 42.95  1 . C  ?  
ATOM   3373 CZ2  CZ2  . TRP TRP TRP A A 425 425 . 79.148  38.075 31.082 1.00 37.22  1 . C  ?  
ATOM   3374 CZ3  CZ3  . TRP TRP TRP A A 425 425 . 78.394  35.785 30.857 1.00 44.05  1 . C  ?  
ATOM   3375 CH2  CH2  . TRP TRP TRP A A 425 425 . 78.427  37.016 31.548 1.00 41.86  1 . C  ?  
ATOM   3376 N    N    . LEU LEU LEU A A 426 426 . 81.800  33.506 28.846 1.00 44.66  1 . N  ?  
ATOM   3377 CA   CA   . LEU LEU LEU A A 426 426 . 81.854  32.943 30.186 1.00 43.30  1 . C  ?  
ATOM   3378 C    C    . LEU LEU LEU A A 426 426 . 83.241  32.413 30.511 1.00 45.63  1 . C  ?  
ATOM   3379 O    O    . LEU LEU LEU A A 426 426 . 83.656  32.446 31.677 1.00 47.69  1 . O  ?  
ATOM   3380 CB   CB   . LEU LEU LEU A A 426 426 . 80.803  31.835 30.318 1.00 46.29  1 . C  ?  
ATOM   3381 CG   CG   . LEU LEU LEU A A 426 426 . 80.352  31.516 31.735 1.00 43.62  1 . C  ?  
ATOM   3382 CD1  CD1  . LEU LEU LEU A A 426 426 . 79.681  32.748 32.341 1.00 40.84  1 . C  ?  
ATOM   3383 CD2  CD2  . LEU LEU LEU A A 426 426 . 79.424  30.328 31.720 1.00 42.11  1 . C  ?  
ATOM   3384 N    N    . SER SER SER A A 427 427 . 83.980  31.935 29.505 1.00 42.50  1 . N  ?  
ATOM   3385 CA   CA   . SER SER SER A A 427 427 . 85.318  31.414 29.779 1.00 45.53  1 . C  ?  
ATOM   3386 C    C    . SER SER SER A A 427 427 . 86.306  32.527 30.121 1.00 48.41  1 . C  ?  
ATOM   3387 O    O    . SER SER SER A A 427 427 . 87.265  32.295 30.867 1.00 49.44  1 . O  ?  
ATOM   3388 CB   CB   . SER SER SER A A 427 427 . 85.826  30.593 28.593 1.00 44.05  1 . C  ?  
ATOM   3389 OG   OG   . SER SER SER A A 427 427 . 85.923  31.381 27.418 1.00 47.70  1 . O  ?  
ATOM   3390 N    N    . LYS LYS LYS A A 428 428 . 86.088  33.739 29.614 1.00 44.86  1 . N  ?  
ATOM   3391 CA   CA   . LYS LYS LYS A A 428 428 . 87.016  34.793 29.982 1.00 44.04  1 . C  ?  
ATOM   3392 C    C    . LYS LYS LYS A A 428 428 . 86.868  35.261 31.447 1.00 47.02  1 . C  ?  
ATOM   3393 O    O    . LYS LYS LYS A A 428 428 . 87.520  36.273 31.792 1.00 49.30  1 . O  ?  
ATOM   3394 CB   CB   . LYS LYS LYS A A 428 428 . 86.833  35.984 29.050 1.00 50.74  1 . C  ?  
ATOM   3395 CG   CG   . LYS LYS LYS A A 428 428 . 87.148  35.725 27.591 1.00 51.64  1 . C  ?  
ATOM   3396 CD   CD   . LYS LYS LYS A A 428 428 . 87.197  37.078 26.876 1.00 59.05  1 . C  ?  
ATOM   3397 CE   CE   . LYS LYS LYS A A 428 428 . 87.919  36.992 25.548 1.00 66.11  1 . C  ?  
ATOM   3398 NZ   NZ   . LYS LYS LYS A A 428 428 . 89.167  37.799 25.589 1.00 58.42  1 . N  ?  
ATOM   3399 N    N    . ASN ASN ASN A A 429 429 . 86.059  34.584 32.273 1.00 44.15  1 . N  ?  
ATOM   3400 CA   CA   . ASN ASN ASN A A 429 429 . 85.768  34.951 33.658 1.00 42.08  1 . C  ?  
ATOM   3401 C    C    . ASN ASN ASN A A 429 429 . 85.229  36.371 33.745 1.00 42.58  1 . C  ?  
ATOM   3402 O    O    . ASN ASN ASN A A 429 429 . 85.835  37.219 34.407 1.00 40.64  1 . O  ?  
ATOM   3403 CB   CB   . ASN ASN ASN A A 429 429 . 87.003  34.815 34.548 1.00 43.59  1 . C  ?  
ATOM   3404 CG   CG   . ASN ASN ASN A A 429 429 . 87.261  33.373 34.973 1.00 48.28  1 . C  ?  
ATOM   3405 OD1  OD1  . ASN ASN ASN A A 429 429 . 86.549  32.456 34.560 1.00 51.05  1 . O  ?  
ATOM   3406 ND2  ND2  . ASN ASN ASN A A 429 429 . 88.281  33.169 35.803 1.00 44.32  1 . N  ?  
ATOM   3407 N    N    . PRO PRO PRO A A 430 430 . 84.079  36.656 33.135 1.00 40.24  1 . N  ?  
ATOM   3408 CA   CA   . PRO PRO PRO A A 430 430 . 83.549  38.020 33.174 1.00 38.67  1 . C  ?  
ATOM   3409 C    C    . PRO PRO PRO A A 430 430 . 83.269  38.467 34.597 1.00 36.61  1 . C  ?  
ATOM   3410 O    O    . PRO PRO PRO A A 430 430 . 83.206  37.674 35.539 1.00 38.08  1 . O  ?  
ATOM   3411 CB   CB   . PRO PRO PRO A A 430 430 . 82.266  37.941 32.344 1.00 38.74  1 . C  ?  
ATOM   3412 CG   CG   . PRO PRO PRO A A 430 430 . 81.893  36.481 32.374 1.00 43.27  1 . C  ?  
ATOM   3413 CD   CD   . PRO PRO PRO A A 430 430 . 83.195  35.730 32.413 1.00 39.65  1 . C  ?  
ATOM   3414 N    N    . LYS LYS LYS A A 431 431 . 83.117  39.781 34.733 1.00 38.65  1 . N  ?  
ATOM   3415 CA   CA   . LYS LYS LYS A A 431 431 . 83.051  40.404 36.047 1.00 40.50  1 . C  ?  
ATOM   3416 C    C    . LYS LYS LYS A A 431 431 . 81.841  39.904 36.836 1.00 42.08  1 . C  ?  
ATOM   3417 O    O    . LYS LYS LYS A A 431 431 . 81.945  39.611 38.038 1.00 39.98  1 . O  ?  
ATOM   3418 CB   CB   . LYS LYS LYS A A 431 431 . 83.014  41.921 35.866 1.00 36.73  1 . C  ?  
ATOM   3419 CG   CG   . LYS LYS LYS A A 431 431 . 82.968  42.712 37.145 1.00 41.44  1 . C  ?  
ATOM   3420 CD   CD   . LYS LYS LYS A A 431 431 . 84.358  42.948 37.642 1.00 50.47  1 . C  ?  
ATOM   3421 CE   CE   . LYS LYS LYS A A 431 431 . 84.411  43.829 38.886 1.00 50.04  1 . C  ?  
ATOM   3422 NZ   NZ   . LYS LYS LYS A A 431 431 . 85.787  43.676 39.515 1.00 56.22  1 . N  ?  
ATOM   3423 N    N    . ILE ILE ILE A A 432 432 . 80.683  39.799 36.174 1.00 36.84  1 . N  ?  
ATOM   3424 CA   CA   . ILE ILE ILE A A 432 432 . 79.473  39.362 36.861 1.00 38.65  1 . C  ?  
ATOM   3425 C    C    . ILE ILE ILE A A 432 432 . 79.645  37.946 37.406 1.00 37.33  1 . C  ?  
ATOM   3426 O    O    . ILE ILE ILE A A 432 432 . 79.265  37.658 38.549 1.00 35.14  1 . O  ?  
ATOM   3427 CB   CB   . ILE ILE ILE A A 432 432 . 78.261  39.481 35.918 1.00 39.69  1 . C  ?  
ATOM   3428 CG1  CG1  . ILE ILE ILE A A 432 432 . 76.965  39.198 36.664 1.00 35.55  1 . C  ?  
ATOM   3429 CG2  CG2  . ILE ILE ILE A A 432 432 . 78.414  38.582 34.696 1.00 34.72  1 . C  ?  
ATOM   3430 CD1  CD1  . ILE ILE ILE A A 432 432 . 75.771  39.692 35.926 1.00 36.88  1 . C  ?  
ATOM   3431 N    N    . LEU LEU LEU A A 433 433 . 80.237  37.043 36.614 1.00 36.43  1 . N  ?  
ATOM   3432 CA   CA   . LEU LEU LEU A A 433 433 . 80.450  35.682 37.113 1.00 39.13  1 . C  ?  
ATOM   3433 C    C    . LEU LEU LEU A A 433 433 . 81.402  35.683 38.299 1.00 38.93  1 . C  ?  
ATOM   3434 O    O    . LEU LEU LEU A A 433 433 . 81.174  34.981 39.290 1.00 42.81  1 . O  ?  
ATOM   3435 CB   CB   . LEU LEU LEU A A 433 433 . 80.982  34.752 36.010 1.00 39.89  1 . C  ?  
ATOM   3436 CG   CG   . LEU LEU LEU A A 433 433 . 81.438  33.356 36.494 1.00 33.70  1 . C  ?  
ATOM   3437 CD1  CD1  . LEU LEU LEU A A 433 433 . 80.337  32.621 37.246 1.00 34.87  1 . C  ?  
ATOM   3438 CD2  CD2  . LEU LEU LEU A A 433 433 . 81.929  32.512 35.350 1.00 35.61  1 . C  ?  
ATOM   3439 N    N    . GLU GLU GLU A A 434 434 . 82.469  36.470 38.219 1.00 37.62  1 . N  ?  
ATOM   3440 CA   CA   . GLU GLU GLU A A 434 434 . 83.419  36.516 39.314 1.00 35.89  1 . C  ?  
ATOM   3441 C    C    . GLU GLU GLU A A 434 434 . 82.766  37.011 40.596 1.00 36.49  1 . C  ?  
ATOM   3442 O    O    . GLU GLU GLU A A 434 434 . 82.991  36.446 41.670 1.00 35.09  1 . O  ?  
ATOM   3443 CB   CB   . GLU GLU GLU A A 434 434 . 84.589  37.409 38.928 1.00 42.95  1 . C  ?  
ATOM   3444 CG   CG   . GLU GLU GLU A A 434 434 . 85.854  37.007 39.596 1.00 53.55  1 . C  ?  
ATOM   3445 CD   CD   . GLU GLU GLU A A 434 434 . 86.910  36.662 38.583 1.00 65.79  1 . C  ?  
ATOM   3446 OE1  OE1  . GLU GLU GLU A A 434 434 . 87.400  37.615 37.917 1.00 68.98  1 . O  ?  
ATOM   3447 OE2  OE2  . GLU GLU GLU A A 434 434 . 87.222  35.445 38.445 1.00 56.62  1 . O  ?  
ATOM   3448 N    N    . ALA ALA ALA A A 435 435 . 81.984  38.095 40.515 1.00 36.84  1 . N  ?  
ATOM   3449 CA   CA   . ALA ALA ALA A A 435 435 . 81.253  38.578 41.687 1.00 35.55  1 . C  ?  
ATOM   3450 C    C    . ALA ALA ALA A A 435 435 . 80.396  37.466 42.295 1.00 35.10  1 . C  ?  
ATOM   3451 O    O    . ALA ALA ALA A A 435 435 . 80.388  37.248 43.512 1.00 35.09  1 . O  ?  
ATOM   3452 CB   CB   . ALA ALA ALA A A 435 435 . 80.390  39.788 41.302 1.00 32.02  1 . C  ?  
ATOM   3453 N    N    . SER SER SER A A 436 436 . 79.659  36.751 41.461 1.00 32.49  1 . N  ?  
ATOM   3454 CA   CA   . SER SER SER A A 436 436 . 78.848  35.671 41.995 1.00 37.96  1 . C  ?  
ATOM   3455 C    C    . SER SER SER A A 436 436 . 79.719  34.634 42.713 1.00 41.96  1 . C  ?  
ATOM   3456 O    O    . SER SER SER A A 436 436 . 79.352  34.123 43.783 1.00 40.17  1 . O  ?  
ATOM   3457 CB   CB   . SER SER SER A A 436 436 . 78.043  35.049 40.857 1.00 37.03  1 . C  ?  
ATOM   3458 OG   OG   . SER SER SER A A 436 436 . 77.683  33.732 41.193 1.00 46.43  1 . O  ?  
ATOM   3459 N    N    . VAL VAL VAL A A 437 437 . 80.888  34.324 42.145 1.00 36.35  1 . N  ?  
ATOM   3460 CA   CA   . VAL VAL VAL A A 437 437 . 81.801  33.361 42.754 1.00 33.90  1 . C  ?  
ATOM   3461 C    C    . VAL VAL VAL A A 437 437 . 82.326  33.871 44.089 1.00 36.91  1 . C  ?  
ATOM   3462 O    O    . VAL VAL VAL A A 437 437 . 82.447  33.110 45.053 1.00 39.14  1 . O  ?  
ATOM   3463 CB   CB   . VAL VAL VAL A A 437 437 . 82.949  33.060 41.784 1.00 36.19  1 . C  ?  
ATOM   3464 CG1  CG1  . VAL VAL VAL A A 437 437 . 84.074  32.367 42.514 1.00 37.89  1 . C  ?  
ATOM   3465 CG2  CG2  . VAL VAL VAL A A 437 437 . 82.438  32.245 40.614 1.00 35.28  1 . C  ?  
ATOM   3466 N    N    . ILE ILE ILE A A 438 438 . 82.654  35.162 44.165 1.00 33.73  1 . N  ?  
ATOM   3467 CA   CA   . ILE ILE ILE A A 438 438 . 83.138  35.761 45.404 1.00 34.12  1 . C  ?  
ATOM   3468 C    C    . ILE ILE ILE A A 438 438 . 82.076  35.696 46.504 1.00 39.67  1 . C  ?  
ATOM   3469 O    O    . ILE ILE ILE A A 438 438 . 82.383  35.405 47.667 1.00 42.35  1 . O  ?  
ATOM   3470 CB   CB   . ILE ILE ILE A A 438 438 . 83.589  37.208 45.127 1.00 36.04  1 . C  ?  
ATOM   3471 CG1  CG1  . ILE ILE ILE A A 438 438 . 84.970  37.206 44.470 1.00 40.63  1 . C  ?  
ATOM   3472 CG2  CG2  . ILE ILE ILE A A 438 438 . 83.589  38.030 46.396 1.00 36.90  1 . C  ?  
ATOM   3473 CD1  CD1  . ILE ILE ILE A A 438 438 . 85.404  38.571 44.014 1.00 40.84  1 . C  ?  
ATOM   3474 N    N    . ILE ILE ILE A A 439 439 . 80.812  35.986 46.160 1.00 40.23  1 . N  ?  
ATOM   3475 CA   CA   . ILE ILE ILE A A 439 439 . 79.732  35.889 47.140 1.00 35.42  1 . C  ?  
ATOM   3476 C    C    . ILE ILE ILE A A 439 439 . 79.657  34.477 47.708 1.00 39.08  1 . C  ?  
ATOM   3477 O    O    . ILE ILE ILE A A 439 439 . 79.676  34.272 48.928 1.00 40.74  1 . O  ?  
ATOM   3478 CB   CB   . ILE ILE ILE A A 439 439 . 78.401  36.326 46.504 1.00 40.86  1 . C  ?  
ATOM   3479 CG1  CG1  . ILE ILE ILE A A 439 439 . 78.356  37.849 46.388 1.00 34.13  1 . C  ?  
ATOM   3480 CG2  CG2  . ILE ILE ILE A A 439 439 . 77.189  35.763 47.275 1.00 37.57  1 . C  ?  
ATOM   3481 CD1  CD1  . ILE ILE ILE A A 439 439 . 77.794  38.335 45.079 1.00 36.54  1 . C  ?  
ATOM   3482 N    N    . CYS CYS CYS A A 440 440 . 79.594  33.477 46.831 1.00 36.26  1 . N  ?  
ATOM   3483 CA   CA   . CYS CYS CYS A A 440 440 . 79.592  32.097 47.297 1.00 40.85  1 . C  ?  
ATOM   3484 C    C    . CYS CYS CYS A A 440 440 . 80.768  31.820 48.236 1.00 44.82  1 . C  ?  
ATOM   3485 O    O    . CYS CYS CYS A A 440 440 . 80.593  31.259 49.326 1.00 40.58  1 . O  ?  
ATOM   3486 CB   CB   . CYS CYS CYS A A 440 440 . 79.622  31.158 46.097 1.00 39.17  1 . C  ?  
ATOM   3487 SG   SG   . CYS CYS CYS A A 440 440 . 79.523  29.465 46.570 1.00 41.84  1 . S  ?  
ATOM   3488 N    N    . ARG ARG ARG A A 441 441 . 81.977  32.225 47.828 1.00 44.52  1 . N  ?  
ATOM   3489 CA   CA   . ARG ARG ARG A A 441 441 . 83.190  31.915 48.588 1.00 44.70  1 . C  ?  
ATOM   3490 C    C    . ARG ARG ARG A A 441 441 . 83.176  32.554 49.977 1.00 45.89  1 . C  ?  
ATOM   3491 O    O    . ARG ARG ARG A A 441 441 . 83.468  31.881 50.974 1.00 44.53  1 . O  ?  
ATOM   3492 CB   CB   . ARG ARG ARG A A 441 441 . 84.429  32.357 47.797 1.00 43.97  1 . C  ?  
ATOM   3493 CG   CG   . ARG ARG ARG A A 441 441 . 85.721  32.479 48.587 1.00 39.12  1 . C  ?  
ATOM   3494 CD   CD   . ARG ARG ARG A A 441 441 . 86.033  31.251 49.394 1.00 43.09  1 . C  ?  
ATOM   3495 NE   NE   . ARG ARG ARG A A 441 441 . 85.986  30.031 48.595 1.00 46.82  1 . N  ?  
ATOM   3496 CZ   CZ   . ARG ARG ARG A A 441 441 . 85.554  28.863 49.065 1.00 45.67  1 . C  ?  
ATOM   3497 NH1  NH1  . ARG ARG ARG A A 441 441 . 85.128  28.773 50.318 1.00 43.72  1 . N  ?  
ATOM   3498 NH2  NH2  . ARG ARG ARG A A 441 441 . 85.533  27.791 48.285 1.00 41.21  1 . N  ?  
ATOM   3499 N    N    . VAL VAL VAL A A 442 442 . 82.829  33.844 50.078 1.00 41.16  1 . N  ?  
ATOM   3500 CA   CA   . VAL VAL VAL A A 442 442 . 82.899  34.470 51.398 1.00 43.41  1 . C  ?  
ATOM   3501 C    C    . VAL VAL VAL A A 442 442 . 81.722  34.070 52.288 1.00 50.07  1 . C  ?  
ATOM   3502 O    O    . VAL VAL VAL A A 442 442 . 81.877  34.008 53.514 1.00 54.77  1 . O  ?  
ATOM   3503 CB   CB   . VAL VAL VAL A A 442 442 . 83.011  36.003 51.306 1.00 49.03  1 . C  ?  
ATOM   3504 CG1  CG1  . VAL VAL VAL A A 442 442 . 83.760  36.422 50.053 1.00 48.95  1 . C  ?  
ATOM   3505 CG2  CG2  . VAL VAL VAL A A 442 442 . 81.651  36.663 51.408 1.00 46.71  1 . C  ?  
ATOM   3506 N    N    . ILE ILE ILE A A 443 443 . 80.534  33.812 51.720 1.00 50.45  1 . N  ?  
ATOM   3507 CA   CA   . ILE ILE ILE A A 443 443 . 79.442  33.266 52.531 1.00 49.65  1 . C  ?  
ATOM   3508 C    C    . ILE ILE ILE A A 443 443 . 79.862  31.923 53.118 1.00 46.96  1 . C  ?  
ATOM   3509 O    O    . ILE ILE ILE A A 443 443 . 79.626  31.635 54.295 1.00 49.02  1 . O  ?  
ATOM   3510 CB   CB   . ILE ILE ILE A A 443 443 . 78.142  33.149 51.701 1.00 47.72  1 . C  ?  
ATOM   3511 CG1  CG1  . ILE ILE ILE A A 443 443 . 77.434  34.497 51.566 1.00 49.72  1 . C  ?  
ATOM   3512 CG2  CG2  . ILE ILE ILE A A 443 443 . 77.186  32.131 52.305 1.00 45.80  1 . C  ?  
ATOM   3513 CD1  CD1  . ILE ILE ILE A A 443 443 . 78.101  35.633 52.350 1.00 58.73  1 . C  ?  
ATOM   3514 N    N    . ASP ASP ASP A A 444 444 . 80.509  31.092 52.306 1.00 49.83  1 . N  ?  
ATOM   3515 CA   CA   . ASP ASP ASP A A 444 444 . 81.039  29.808 52.760 1.00 52.29  1 . C  ?  
ATOM   3516 C    C    . ASP ASP ASP A A 444 444 . 81.960  29.935 53.961 1.00 56.84  1 . C  ?  
ATOM   3517 O    O    . ASP ASP ASP A A 444 444 . 81.792  29.232 54.964 1.00 58.60  1 . O  ?  
ATOM   3518 CB   CB   . ASP ASP ASP A A 444 444 . 81.811  29.164 51.632 1.00 54.47  1 . C  ?  
ATOM   3519 CG   CG   . ASP ASP ASP A A 444 444 . 80.981  28.257 50.862 1.00 62.28  1 . C  ?  
ATOM   3520 OD1  OD1  . ASP ASP ASP A A 444 444 . 80.222  27.528 51.533 1.00 71.29  1 . O  ?  
ATOM   3521 OD2  OD2  . ASP ASP ASP A A 444 444 . 81.041  28.285 49.610 1.00 62.27  1 . O  ?  
ATOM   3522 N    N    . ASP ASP ASP A A 445 445 . 82.997  30.773 53.842 1.00 47.63  1 . N  ?  
ATOM   3523 CA   CA   . ASP ASP ASP A A 445 445 . 84.018  30.793 54.878 1.00 51.49  1 . C  ?  
ATOM   3524 C    C    . ASP ASP ASP A A 445 445 . 83.509  31.468 56.141 1.00 60.36  1 . C  ?  
ATOM   3525 O    O    . ASP ASP ASP A A 445 445 . 83.965  31.131 57.243 1.00 66.28  1 . O  ?  
ATOM   3526 CB   CB   . ASP ASP ASP A A 445 445 . 85.295  31.489 54.386 1.00 56.06  1 . C  ?  
ATOM   3527 CG   CG   . ASP ASP ASP A A 445 445 . 85.841  30.898 53.095 1.00 53.13  1 . C  ?  
ATOM   3528 OD1  OD1  . ASP ASP ASP A A 445 445 . 85.441  29.776 52.702 1.00 52.44  1 . O  ?  
ATOM   3529 OD2  OD2  . ASP ASP ASP A A 445 445 . 86.686  31.568 52.472 1.00 48.44  1 . O  ?  
ATOM   3530 N    N    . THR THR THR A A 446 446 . 82.593  32.435 56.007 1.00 53.99  1 . N  ?  
ATOM   3531 CA   CA   . THR THR THR A A 446 446 . 81.973  33.013 57.193 1.00 56.57  1 . C  ?  
ATOM   3532 C    C    . THR THR THR A A 446 446 . 81.159  31.967 57.935 1.00 59.03  1 . C  ?  
ATOM   3533 O    O    . THR THR THR A A 446 446 . 81.122  31.960 59.169 1.00 66.56  1 . O  ?  
ATOM   3534 CB   CB   . THR THR THR A A 446 446 . 81.080  34.197 56.828 1.00 49.93  1 . C  ?  
ATOM   3535 OG1  OG1  . THR THR THR A A 446 446 . 81.880  35.275 56.328 1.00 55.82  1 . O  ?  
ATOM   3536 CG2  CG2  . THR THR THR A A 446 446 . 80.346  34.672 58.057 1.00 52.12  1 . C  ?  
ATOM   3537 N    N    . ALA ALA ALA A A 447 447 . 80.497  31.075 57.198 1.00 56.86  1 . N  ?  
ATOM   3538 CA   CA   . ALA ALA ALA A A 447 447 . 79.605  30.105 57.820 1.00 58.50  1 . C  ?  
ATOM   3539 C    C    . ALA ALA ALA A A 447 447 . 80.395  28.923 58.347 1.00 66.64  1 . C  ?  
ATOM   3540 O    O    . ALA ALA ALA A A 447 447 . 80.315  28.576 59.529 1.00 71.77  1 . O  ?  
ATOM   3541 CB   CB   . ALA ALA ALA A A 447 447 . 78.559  29.626 56.812 1.00 54.97  1 . C  ?  
ATOM   3542 N    N    . THR THR THR A A 448 448 . 81.173  28.296 57.468 1.00 67.00  1 . N  ?  
ATOM   3543 CA   CA   . THR THR THR A A 448 448 . 81.957  27.116 57.793 1.00 69.51  1 . C  ?  
ATOM   3544 C    C    . THR THR THR A A 448 448 . 83.287  27.465 58.434 1.00 76.32  1 . C  ?  
ATOM   3545 O    O    . THR THR THR A A 448 448 . 84.241  26.690 58.311 1.00 87.83  1 . O  ?  
ATOM   3546 CB   CB   . THR THR THR A A 448 448 . 82.188  26.278 56.533 1.00 69.47  1 . C  ?  
ATOM   3547 OG1  OG1  . THR THR THR A A 448 448 . 83.193  26.909 55.716 1.00 69.09  1 . O  ?  
ATOM   3548 CG2  CG2  . THR THR THR A A 448 448 . 80.881  26.151 55.732 1.00 63.29  1 . C  ?  
ATOM   3549 N    N    . TYR TYR TYR A A 449 449 . 83.391  28.611 59.108 1.00 70.85  1 . N  ?  
ATOM   3550 CA   CA   . TYR TYR TYR A A 449 449 . 84.651  28.927 59.768 1.00 77.93  1 . C  ?  
ATOM   3551 C    C    . TYR TYR TYR A A 449 449 . 84.863  28.027 60.976 1.00 89.92  1 . C  ?  
ATOM   3552 O    O    . TYR TYR TYR A A 449 449 . 85.674  27.094 60.925 1.00 95.52  1 . O  ?  
ATOM   3553 CB   CB   . TYR TYR TYR A A 449 449 . 84.732  30.387 60.213 1.00 74.50  1 . C  ?  
ATOM   3554 CG   CG   . TYR TYR TYR A A 449 449 . 86.049  30.675 60.911 1.00 79.39  1 . C  ?  
ATOM   3555 CD1  CD1  . TYR TYR TYR A A 449 449 . 87.206  29.968 60.568 1.00 81.02  1 . C  ?  
ATOM   3556 CD2  CD2  . TYR TYR TYR A A 449 449 . 86.136  31.622 61.923 1.00 78.55  1 . C  ?  
ATOM   3557 CE1  CE1  . TYR TYR TYR A A 449 449 . 88.414  30.206 61.199 1.00 83.36  1 . C  ?  
ATOM   3558 CE2  CE2  . TYR TYR TYR A A 449 449 . 87.344  31.872 62.565 1.00 86.54  1 . C  ?  
ATOM   3559 CZ   CZ   . TYR TYR TYR A A 449 449 . 88.483  31.160 62.200 1.00 88.23  1 . C  ?  
ATOM   3560 OH   OH   . TYR TYR TYR A A 449 449 . 89.693  31.399 62.832 1.00 88.41  1 . O  ?  
ATOM   3561 N    N    . GLU GLU GLU A A 450 450 . 84.147  28.313 62.068 1.00 91.37  1 . N  ?  
ATOM   3562 CA   CA   . GLU GLU GLU A A 450 450 . 84.332  27.559 63.305 1.00 94.72  1 . C  ?  
ATOM   3563 C    C    . GLU GLU GLU A A 450 450 . 84.346  26.056 63.042 1.00 96.75  1 . C  ?  
ATOM   3564 O    O    . GLU GLU GLU A A 450 450 . 85.300  25.354 63.405 1.00 93.68  1 . O  ?  
ATOM   3565 CB   CB   . GLU GLU GLU A A 450 450 . 83.229  27.920 64.300 1.00 97.05  1 . C  ?  
ATOM   3566 CG   CG   . GLU GLU GLU A A 450 450 . 83.655  27.800 65.755 1.00 101.27 1 . C  ?  
ATOM   3567 CD   CD   . GLU GLU GLU A A 450 450 . 84.663  28.863 66.157 1.00 105.05 1 . C  ?  
ATOM   3568 OE1  OE1  . GLU GLU GLU A A 450 450 . 84.417  30.058 65.866 1.00 99.12  1 . O  ?  
ATOM   3569 OE2  OE2  . GLU GLU GLU A A 450 450 . 85.701  28.499 66.756 1.00 104.83 1 . O  ?  
ATOM   3570 O    O    . VAL VAL VAL A A 451 451 . 84.478  22.263 61.501 1.00 101.35 1 . O  ?  
ATOM   3571 N    N    . VAL VAL VAL A A 451 451 . 83.304  25.556 62.377 1.00 96.55  1 . N  ?  
ATOM   3572 CA   CA   . VAL VAL VAL A A 451 451 . 83.103  24.132 62.132 1.00 95.40  1 . C  ?  
ATOM   3573 C    C    . VAL VAL VAL A A 451 451 . 84.316  23.490 61.465 1.00 99.41  1 . C  ?  
ATOM   3574 CB   CB   . VAL VAL VAL A A 451 451 . 81.843  23.911 61.276 1.00 94.03  1 . C  ?  
ATOM   3575 CG1  CG1  . VAL VAL VAL A A 451 451 . 81.263  22.518 61.526 1.00 92.29  1 . C  ?  
ATOM   3576 CG2  CG2  . VAL VAL VAL A A 451 451 . 80.824  25.015 61.542 1.00 92.67  1 . C  ?  
ATOM   3577 O    O    . GLU GLU GLU A A 452 452 . 88.630  23.311 60.806 1.00 98.19  1 . O  ?  
ATOM   3578 N    N    . GLU GLU GLU A A 452 452 . 85.170  24.295 60.836 1.00 96.01  1 . N  ?  
ATOM   3579 CA   CA   . GLU GLU GLU A A 452 452 . 86.365  23.746 60.209 1.00 98.67  1 . C  ?  
ATOM   3580 C    C    . GLU GLU GLU A A 452 452 . 87.642  24.032 60.990 1.00 100.80 1 . C  ?  
ATOM   3581 CB   CB   . GLU GLU GLU A A 452 452 . 86.499  24.252 58.766 1.00 94.51  1 . C  ?  
ATOM   3582 CG   CG   . GLU GLU GLU A A 452 452 . 86.024  23.227 57.731 1.00 94.74  1 . C  ?  
ATOM   3583 CD   CD   . GLU GLU GLU A A 452 452 . 86.032  23.768 56.307 1.00 96.96  1 . C  ?  
ATOM   3584 OE1  OE1  . GLU GLU GLU A A 452 452 . 85.750  24.976 56.125 1.00 87.28  1 . O  ?  
ATOM   3585 OE2  OE2  . GLU GLU GLU A A 452 452 . 86.325  22.981 55.373 1.00 97.44  1 . O  ?  
ATOM   3586 O    O    . LYS LYS LYS A A 453 453 . 89.533  23.840 64.696 1.00 103.83 1 . O  ?  
ATOM   3587 N    N    . LYS LYS LYS A A 453 453 . 87.650  25.044 61.864 1.00 99.96  1 . N  ?  
ATOM   3588 CA   CA   . LYS LYS LYS A A 453 453 . 88.718  25.128 62.855 1.00 98.93  1 . C  ?  
ATOM   3589 C    C    . LYS LYS LYS A A 453 453 . 88.592  24.041 63.917 1.00 105.44 1 . C  ?  
ATOM   3590 CB   CB   . LYS LYS LYS A A 453 453 . 88.735  26.509 63.509 1.00 94.88  1 . C  ?  
ATOM   3591 CG   CG   . LYS LYS LYS A A 453 453 . 89.875  27.399 63.042 1.00 93.23  1 . C  ?  
ATOM   3592 CD   CD   . LYS LYS LYS A A 453 453 . 89.930  28.664 63.885 1.00 97.44  1 . C  ?  
ATOM   3593 CE   CE   . LYS LYS LYS A A 453 453 . 90.037  28.331 65.372 1.00 97.87  1 . C  ?  
ATOM   3594 NZ   NZ   . LYS LYS LYS A A 453 453 . 89.371  29.346 66.242 1.00 91.30  1 . N  ?  
ATOM   3595 O    O    . SER SER SER A A 454 454 . 88.754  20.236 64.855 1.00 100.52 1 . O  ?  
ATOM   3596 N    N    . SER SER SER A A 454 454 . 87.452  23.342 63.958 1.00 106.08 1 . N  ?  
ATOM   3597 CA   CA   . SER SER SER A A 454 454 . 87.314  22.155 64.797 1.00 100.31 1 . C  ?  
ATOM   3598 C    C    . SER SER SER A A 454 454 . 88.021  20.958 64.173 1.00 98.22  1 . C  ?  
ATOM   3599 CB   CB   . SER SER SER A A 454 454 . 85.838  21.830 65.004 1.00 100.81 1 . C  ?  
ATOM   3600 OG   OG   . SER SER SER A A 454 454 . 85.333  21.126 63.877 1.00 98.48  1 . O  ?  
ATOM   3601 O    O    . ARG ARG ARG A A 455 455 . 90.370  19.414 60.769 1.00 101.31 1 . O  ?  
ATOM   3602 N    N    . ARG ARG ARG A A 455 455 . 87.795  20.721 62.877 1.00 102.83 1 . N  ?  
ATOM   3603 CA   CA   . ARG ARG ARG A A 455 455 . 88.418  19.613 62.156 1.00 101.25 1 . C  ?  
ATOM   3604 C    C    . ARG ARG ARG A A 455 455 . 89.847  19.960 61.747 1.00 102.13 1 . C  ?  
ATOM   3605 CB   CB   . ARG ARG ARG A A 455 455 . 87.598  19.236 60.913 1.00 101.63 1 . C  ?  
ATOM   3606 CG   CG   . ARG ARG ARG A A 455 455 . 86.090  19.142 61.147 1.00 103.96 1 . C  ?  
ATOM   3607 CD   CD   . ARG ARG ARG A A 455 455 . 85.305  18.966 59.842 1.00 103.29 1 . C  ?  
ATOM   3608 NE   NE   . ARG ARG ARG A A 455 455 . 85.449  17.630 59.264 1.00 106.22 1 . N  ?  
ATOM   3609 CZ   CZ   . ARG ARG ARG A A 455 455 . 85.945  17.380 58.055 1.00 104.85 1 . C  ?  
ATOM   3610 NH1  NH1  . ARG ARG ARG A A 455 455 . 86.035  16.125 57.621 1.00 96.82  1 . N  ?  
ATOM   3611 NH2  NH2  . ARG ARG ARG A A 455 455 . 86.340  18.382 57.274 1.00 101.44 1 . N  ?  
ATOM   3612 O    O    . GLY GLY GLY A A 456 456 . 93.291  21.588 60.381 1.00 90.63  1 . O  ?  
ATOM   3613 N    N    . GLY GLY GLY A A 456 456 . 90.482  20.871 62.482 1.00 99.80  1 . N  ?  
ATOM   3614 CA   CA   . GLY GLY GLY A A 456 456 . 91.886  21.172 62.257 1.00 98.05  1 . C  ?  
ATOM   3615 C    C    . GLY GLY GLY A A 456 456 . 92.192  21.788 60.911 1.00 97.96  1 . C  ?  
ATOM   3616 O    O    . GLN GLN GLN A A 457 457 . 92.080  25.292 60.168 1.00 93.61  1 . O  ?  
ATOM   3617 N    N    . GLN GLN GLN A A 457 457 . 91.245  22.531 60.338 1.00 100.49 1 . N  ?  
ATOM   3618 CA   CA   . GLN GLN GLN A A 457 457 . 91.489  23.233 59.083 1.00 93.97  1 . C  ?  
ATOM   3619 C    C    . GLN GLN GLN A A 457 457 . 92.402  24.418 59.352 1.00 90.51  1 . C  ?  
ATOM   3620 CB   CB   . GLN GLN GLN A A 457 457 . 90.178  23.688 58.443 1.00 95.94  1 . C  ?  
ATOM   3621 CG   CG   . GLN GLN GLN A A 457 457 . 89.269  22.545 57.991 1.00 99.17  1 . C  ?  
ATOM   3622 CD   CD   . GLN GLN GLN A A 457 457 . 89.678  21.979 56.646 1.00 97.17  1 . C  ?  
ATOM   3623 OE1  OE1  . GLN GLN GLN A A 457 457 . 90.560  22.524 55.979 1.00 95.07  1 . O  ?  
ATOM   3624 NE2  NE2  . GLN GLN GLN A A 457 457 . 89.032  20.888 56.235 1.00 94.12  1 . N  ?  
ATOM   3625 O    O    . ILE ILE ILE A A 458 458 . 94.920  27.682 58.025 1.00 81.44  1 . O  ?  
ATOM   3626 N    N    . ILE ILE ILE A A 458 458 . 93.547  24.437 58.677 1.00 87.44  1 . N  ?  
ATOM   3627 CA   CA   . ILE ILE ILE A A 458 458 . 94.530  25.484 58.895 1.00 84.98  1 . C  ?  
ATOM   3628 C    C    . ILE ILE ILE A A 458 458 . 94.473  26.545 57.796 1.00 81.42  1 . C  ?  
ATOM   3629 CB   CB   . ILE ILE ILE A A 458 458 . 95.944  24.870 59.026 1.00 78.87  1 . C  ?  
ATOM   3630 CG1  CG1  . ILE ILE ILE A A 458 458 . 96.932  25.906 59.573 1.00 79.57  1 . C  ?  
ATOM   3631 CG2  CG2  . ILE ILE ILE A A 458 458 . 96.393  24.257 57.692 1.00 69.72  1 . C  ?  
ATOM   3632 CD1  CD1  . ILE ILE ILE A A 458 458 . 96.496  26.534 60.913 1.00 81.93  1 . C  ?  
ATOM   3633 O    O    . ALA ALA ALA A A 459 459 . 91.919  27.563 54.080 1.00 72.11  1 . O  ?  
ATOM   3634 N    N    . ALA ALA ALA A A 459 459 . 93.925  26.222 56.624 1.00 80.89  1 . N  ?  
ATOM   3635 CA   CA   . ALA ALA ALA A A 459 459 . 93.813  27.162 55.513 1.00 79.93  1 . C  ?  
ATOM   3636 C    C    . ALA ALA ALA A A 459 459 . 92.356  27.529 55.234 1.00 77.21  1 . C  ?  
ATOM   3637 CB   CB   . ALA ALA ALA A A 459 459 . 94.478  26.591 54.262 1.00 66.42  1 . C  ?  
ATOM   3638 O    O    . THR THR THR A A 460 460 . 91.300  30.523 55.951 1.00 67.87  1 . O  ?  
ATOM   3639 N    N    . THR THR THR A A 460 460 . 91.581  27.801 56.284 1.00 76.44  1 . N  ?  
ATOM   3640 CA   CA   . THR THR THR A A 460 460 . 90.251  28.357 56.081 1.00 69.67  1 . C  ?  
ATOM   3641 C    C    . THR THR THR A A 460 460 . 90.372  29.794 55.589 1.00 67.10  1 . C  ?  
ATOM   3642 CB   CB   . THR THR THR A A 460 460 . 89.427  28.326 57.374 1.00 74.81  1 . C  ?  
ATOM   3643 OG1  OG1  . THR THR THR A A 460 460 . 90.048  29.150 58.373 1.00 75.48  1 . O  ?  
ATOM   3644 CG2  CG2  . THR THR THR A A 460 460 . 89.272  26.903 57.904 1.00 80.35  1 . C  ?  
ATOM   3645 O    O    . GLY GLY GLY A A 461 461 . 90.520  33.515 55.139 1.00 57.82  1 . O  ?  
ATOM   3646 N    N    . GLY GLY GLY A A 461 461 . 89.416  30.206 54.759 1.00 65.93  1 . N  ?  
ATOM   3647 CA   CA   . GLY GLY GLY A A 461 461 . 89.452  31.565 54.235 1.00 59.93  1 . C  ?  
ATOM   3648 C    C    . GLY GLY GLY A A 461 461 . 89.691  32.612 55.305 1.00 62.27  1 . C  ?  
ATOM   3649 N    N    . ILE ILE ILE A A 462 462 . 88.970  32.512 56.426 1.00 64.43  1 . N  ?  
ATOM   3650 CA   CA   . ILE ILE ILE A A 462 462 . 89.080  33.534 57.466 1.00 66.27  1 . C  ?  
ATOM   3651 C    C    . ILE ILE ILE A A 462 462 . 90.474  33.524 58.081 1.00 67.50  1 . C  ?  
ATOM   3652 O    O    . ILE ILE ILE A A 462 462 . 91.061  34.584 58.341 1.00 67.11  1 . O  ?  
ATOM   3653 CB   CB   . ILE ILE ILE A A 462 462 . 87.984  33.337 58.532 1.00 70.29  1 . C  ?  
ATOM   3654 CG1  CG1  . ILE ILE ILE A A 462 462 . 86.603  33.653 57.955 1.00 67.07  1 . C  ?  
ATOM   3655 CG2  CG2  . ILE ILE ILE A A 462 462 . 88.234  34.237 59.724 1.00 72.47  1 . C  ?  
ATOM   3656 CD1  CD1  . ILE ILE ILE A A 462 462 . 86.423  35.111 57.596 1.00 59.32  1 . C  ?  
ATOM   3657 N    N    . GLU GLU GLU A A 463 463 . 91.026  32.327 58.314 1.00 67.89  1 . N  ?  
ATOM   3658 CA   CA   . GLU GLU GLU A A 463 463 . 92.367  32.197 58.878 1.00 68.81  1 . C  ?  
ATOM   3659 C    C    . GLU GLU GLU A A 463 463 . 93.397  32.920 58.016 1.00 64.57  1 . C  ?  
ATOM   3660 O    O    . GLU GLU GLU A A 463 463 . 94.093  33.831 58.484 1.00 62.60  1 . O  ?  
ATOM   3661 CB   CB   . GLU GLU GLU A A 463 463 . 92.731  30.717 59.023 1.00 77.70  1 . C  ?  
ATOM   3662 CG   CG   . GLU GLU GLU A A 463 463 . 93.918  30.443 59.941 1.00 80.62  1 . C  ?  
ATOM   3663 CD   CD   . GLU GLU GLU A A 463 463 . 93.480  29.957 61.314 1.00 90.98  1 . C  ?  
ATOM   3664 OE1  OE1  . GLU GLU GLU A A 463 463 . 92.771  28.922 61.381 1.00 91.83  1 . O  ?  
ATOM   3665 OE2  OE2  . GLU GLU GLU A A 463 463 . 93.835  30.617 62.320 1.00 91.30  1 . O  ?  
ATOM   3666 N    N    . CYS CYS CYS A A 464 464 . 93.507  32.521 56.745 1.00 59.86  1 . N  ?  
ATOM   3667 CA   CA   . CYS CYS CYS A A 464 464 . 94.370  33.220 55.798 1.00 63.74  1 . C  ?  
ATOM   3668 C    C    . CYS CYS CYS A A 464 464 . 94.222  34.725 55.944 1.00 60.90  1 . C  ?  
ATOM   3669 O    O    . CYS CYS CYS A A 464 464 . 95.207  35.462 55.848 1.00 61.80  1 . O  ?  
ATOM   3670 CB   CB   . CYS CYS CYS A A 464 464 . 94.051  32.830 54.354 1.00 56.30  1 . C  ?  
ATOM   3671 SG   SG   . CYS CYS CYS A A 464 464 . 94.258  31.104 53.953 1.00 61.42  1 . S  ?  
ATOM   3672 N    N    . CYS CYS CYS A A 465 465 . 92.986  35.186 56.163 1.00 62.69  1 . N  ?  
ATOM   3673 CA   CA   . CYS CYS CYS A A 465 465 . 92.727  36.618 56.192 1.00 61.16  1 . C  ?  
ATOM   3674 C    C    . CYS CYS CYS A A 465 465 . 93.267  37.248 57.467 1.00 64.95  1 . C  ?  
ATOM   3675 O    O    . CYS CYS CYS A A 465 465 . 93.868  38.331 57.424 1.00 64.89  1 . O  ?  
ATOM   3676 CB   CB   . CYS CYS CYS A A 465 465 . 91.225  36.886 56.047 1.00 64.34  1 . C  ?  
ATOM   3677 SG   SG   . CYS CYS CYS A A 465 465 . 90.802  38.644 56.106 1.00 61.70  1 . S  ?  
ATOM   3678 N    N    . MET MET MET A A 466 466 . 93.053  36.596 58.612 1.00 67.15  1 . N  ?  
ATOM   3679 CA   CA   . MET MET MET A A 466 466 . 93.579  37.131 59.866 1.00 73.67  1 . C  ?  
ATOM   3680 C    C    . MET MET MET A A 466 466 . 95.103  37.161 59.847 1.00 72.22  1 . C  ?  
ATOM   3681 O    O    . MET MET MET A A 466 466 . 95.725  38.186 60.161 1.00 71.10  1 . O  ?  
ATOM   3682 CB   CB   . MET MET MET A A 466 466 . 93.090  36.292 61.043 1.00 72.37  1 . C  ?  
ATOM   3683 CG   CG   . MET MET MET A A 466 466 . 91.645  35.908 60.986 1.00 70.06  1 . C  ?  
ATOM   3684 SD   SD   . MET MET MET A A 466 466 . 91.272  34.890 62.412 1.00 74.09  1 . S  ?  
ATOM   3685 CE   CE   . MET MET MET A A 466 466 . 91.958  33.319 61.881 1.00 73.99  1 . C  ?  
ATOM   3686 N    N    . ARG ARG ARG A A 467 467 . 95.716  36.030 59.484 1.00 69.82  1 . N  ?  
ATOM   3687 CA   CA   . ARG ARG ARG A A 467 467 . 97.173  35.919 59.463 1.00 70.28  1 . C  ?  
ATOM   3688 C    C    . ARG ARG ARG A A 467 467 . 97.788  36.871 58.442 1.00 69.27  1 . C  ?  
ATOM   3689 O    O    . ARG ARG ARG A A 467 467 . 98.826  37.493 58.702 1.00 74.97  1 . O  ?  
ATOM   3690 CB   CB   . ARG ARG ARG A A 467 467 . 97.560  34.464 59.176 1.00 67.44  1 . C  ?  
ATOM   3691 CG   CG   . ARG ARG ARG A A 467 467 . 99.036  34.188 58.930 1.00 69.50  1 . C  ?  
ATOM   3692 CD   CD   . ARG ARG ARG A A 467 467 . 99.310  32.687 59.096 1.00 68.61  1 . C  ?  
ATOM   3693 NE   NE   . ARG ARG ARG A A 467 467 . 100.647 32.308 58.653 1.00 74.26  1 . N  ?  
ATOM   3694 CZ   CZ   . ARG ARG ARG A A 467 467 . 101.233 31.146 58.934 1.00 71.13  1 . C  ?  
ATOM   3695 NH1  NH1  . ARG ARG ARG A A 467 467 . 100.601 30.244 59.668 1.00 76.80  1 . N  ?  
ATOM   3696 NH2  NH2  . ARG ARG ARG A A 467 467 . 102.456 30.888 58.486 1.00 62.35  1 . N  ?  
ATOM   3697 N    N    . ASP ASP ASP A A 468 468 . 97.156  37.011 57.282 1.00 66.49  1 . N  ?  
ATOM   3698 CA   CA   . ASP ASP ASP A A 468 468 . 97.690  37.896 56.257 1.00 61.70  1 . C  ?  
ATOM   3699 C    C    . ASP ASP ASP A A 468 468 . 97.699  39.350 56.728 1.00 66.50  1 . C  ?  
ATOM   3700 O    O    . ASP ASP ASP A A 468 468 . 98.744  40.008 56.700 1.00 68.57  1 . O  ?  
ATOM   3701 CB   CB   . ASP ASP ASP A A 468 468 . 96.880  37.729 54.975 1.00 61.08  1 . C  ?  
ATOM   3702 CG   CG   . ASP ASP ASP A A 468 468 . 97.570  38.311 53.777 1.00 60.52  1 . C  ?  
ATOM   3703 OD1  OD1  . ASP ASP ASP A A 468 468 . 98.553  39.047 53.982 1.00 67.89  1 . O  ?  
ATOM   3704 OD2  OD2  . ASP ASP ASP A A 468 468 . 97.131  38.042 52.634 1.00 56.24  1 . O  ?  
ATOM   3705 N    N    . TYR TYR TYR A A 469 469 . 96.546  39.865 57.183 1.00 67.53  1 . N  ?  
ATOM   3706 CA   CA   . TYR TYR TYR A A 469 469 . 96.393  41.283 57.522 1.00 68.69  1 . C  ?  
ATOM   3707 C    C    . TYR TYR TYR A A 469 469 . 96.692  41.601 58.979 1.00 66.58  1 . C  ?  
ATOM   3708 O    O    . TYR TYR TYR A A 469 469 . 96.838  42.783 59.319 1.00 65.91  1 . O  ?  
ATOM   3709 CB   CB   . TYR TYR TYR A A 469 469 . 94.965  41.767 57.203 1.00 67.40  1 . C  ?  
ATOM   3710 CG   CG   . TYR TYR TYR A A 469 469 . 94.660  41.778 55.730 1.00 66.06  1 . C  ?  
ATOM   3711 CD2  CD2  . TYR TYR TYR A A 469 469 . 94.880  42.914 54.961 1.00 64.10  1 . C  ?  
ATOM   3712 CD1  CD1  . TYR TYR TYR A A 469 469 . 94.180  40.642 55.100 1.00 69.29  1 . C  ?  
ATOM   3713 CE2  CE2  . TYR TYR TYR A A 469 469 . 94.618  42.918 53.597 1.00 66.74  1 . C  ?  
ATOM   3714 CE1  CE1  . TYR TYR TYR A A 469 469 . 93.920  40.631 53.741 1.00 71.70  1 . C  ?  
ATOM   3715 CZ   CZ   . TYR TYR TYR A A 469 469 . 94.138  41.769 52.992 1.00 72.03  1 . C  ?  
ATOM   3716 OH   OH   . TYR TYR TYR A A 469 469 . 93.873  41.740 51.640 1.00 70.73  1 . O  ?  
ATOM   3717 O    O    . GLY GLY GLY A A 470 470 . 95.807  42.690 62.213 1.00 72.03  1 . O  ?  
ATOM   3718 N    N    . GLY GLY GLY A A 470 470 . 96.769  40.591 59.843 1.00 68.16  1 . N  ?  
ATOM   3719 CA   CA   . GLY GLY GLY A A 470 470 . 96.957  40.821 61.261 1.00 66.26  1 . C  ?  
ATOM   3720 C    C    . GLY GLY GLY A A 470 470 . 95.755  41.505 61.867 1.00 68.75  1 . C  ?  
ATOM   3721 N    N    . ILE ILE ILE A A 471 471 . 94.657  40.759 61.979 1.00 71.65  1 . N  ?  
ATOM   3722 CA   CA   . ILE ILE ILE A A 471 471 . 93.374  41.301 62.411 1.00 71.04  1 . C  ?  
ATOM   3723 C    C    . ILE ILE ILE A A 471 471 . 92.565  40.159 63.006 1.00 75.98  1 . C  ?  
ATOM   3724 O    O    . ILE ILE ILE A A 471 471 . 92.738  38.992 62.635 1.00 78.21  1 . O  ?  
ATOM   3725 CB   CB   . ILE ILE ILE A A 471 471 . 92.624  41.979 61.240 1.00 71.30  1 . C  ?  
ATOM   3726 CG1  CG1  . ILE ILE ILE A A 471 471 . 92.445  40.983 60.088 1.00 71.65  1 . C  ?  
ATOM   3727 CG2  CG2  . ILE ILE ILE A A 471 471 . 93.366  43.228 60.779 1.00 65.35  1 . C  ?  
ATOM   3728 CD1  CD1  . ILE ILE ILE A A 471 471 . 91.538  41.452 58.977 1.00 68.20  1 . C  ?  
ATOM   3729 N    N    . SER SER SER A A 472 472 . 91.684  40.493 63.945 1.00 72.08  1 . N  ?  
ATOM   3730 CA   CA   . SER SER SER A A 472 472 . 90.997  39.445 64.677 1.00 75.40  1 . C  ?  
ATOM   3731 C    C    . SER SER SER A A 472 472 . 90.000  38.738 63.773 1.00 75.37  1 . C  ?  
ATOM   3732 O    O    . SER SER SER A A 472 472 . 89.723  39.165 62.650 1.00 74.17  1 . O  ?  
ATOM   3733 CB   CB   . SER SER SER A A 472 472 . 90.276  40.015 65.889 1.00 78.84  1 . C  ?  
ATOM   3734 OG   OG   . SER SER SER A A 472 472 . 89.159  40.761 65.467 1.00 78.73  1 . O  ?  
ATOM   3735 N    N    . THR THR THR A A 473 473 . 89.452  37.634 64.287 1.00 77.73  1 . N  ?  
ATOM   3736 CA   CA   . THR THR THR A A 473 473 . 88.408  36.921 63.559 1.00 78.33  1 . C  ?  
ATOM   3737 C    C    . THR THR THR A A 473 473 . 87.290  37.865 63.118 1.00 74.59  1 . C  ?  
ATOM   3738 O    O    . THR THR THR A A 473 473 . 86.841  37.812 61.968 1.00 72.92  1 . O  ?  
ATOM   3739 CB   CB   . THR THR THR A A 473 473 . 87.843  35.786 64.419 1.00 82.24  1 . C  ?  
ATOM   3740 OG1  OG1  . THR THR THR A A 473 473 . 87.595  36.269 65.745 1.00 89.27  1 . O  ?  
ATOM   3741 CG2  CG2  . THR THR THR A A 473 473 . 88.811  34.609 64.481 1.00 80.02  1 . C  ?  
ATOM   3742 N    N    . LYS LYS LYS A A 474 474 . 86.830  38.745 64.009 1.00 73.11  1 . N  ?  
ATOM   3743 CA   CA   . LYS LYS LYS A A 474 474 . 85.742  39.646 63.639 1.00 73.86  1 . C  ?  
ATOM   3744 C    C    . LYS LYS LYS A A 474 474 . 86.132  40.509 62.440 1.00 76.57  1 . C  ?  
ATOM   3745 O    O    . LYS LYS LYS A A 474 474 . 85.535  40.398 61.362 1.00 78.32  1 . O  ?  
ATOM   3746 CB   CB   . LYS LYS LYS A A 474 474 . 85.326  40.516 64.831 1.00 81.33  1 . C  ?  
ATOM   3747 CG   CG   . LYS LYS LYS A A 474 474 . 86.488  41.079 65.647 1.00 88.25  1 . C  ?  
ATOM   3748 CD   CD   . LYS LYS LYS A A 474 474 . 86.152  42.410 66.328 1.00 90.39  1 . C  ?  
ATOM   3749 CE   CE   . LYS LYS LYS A A 474 474 . 86.263  43.584 65.355 1.00 87.63  1 . C  ?  
ATOM   3750 NZ   NZ   . LYS LYS LYS A A 474 474 . 87.102  44.699 65.888 1.00 79.02  1 . N  ?  
ATOM   3751 N    N    . GLU GLU GLU A A 475 475 . 87.142  41.370 62.606 1.00 75.58  1 . N  ?  
ATOM   3752 CA   CA   . GLU GLU GLU A A 475 475 . 87.540  42.267 61.522 1.00 74.88  1 . C  ?  
ATOM   3753 C    C    . GLU GLU GLU A A 475 475 . 87.706  41.517 60.209 1.00 71.92  1 . C  ?  
ATOM   3754 O    O    . GLU GLU GLU A A 475 475 . 87.346  42.024 59.141 1.00 74.03  1 . O  ?  
ATOM   3755 CB   CB   . GLU GLU GLU A A 475 475 . 88.840  42.981 61.882 1.00 74.81  1 . C  ?  
ATOM   3756 CG   CG   . GLU GLU GLU A A 475 475 . 88.979  43.270 63.358 1.00 80.09  1 . C  ?  
ATOM   3757 CD   CD   . GLU GLU GLU A A 475 475 . 90.370  43.741 63.721 1.00 83.73  1 . C  ?  
ATOM   3758 OE1  OE1  . GLU GLU GLU A A 475 475 . 90.737  44.873 63.330 1.00 78.78  1 . O  ?  
ATOM   3759 OE2  OE2  . GLU GLU GLU A A 475 475 . 91.101  42.964 64.380 1.00 85.09  1 . O  ?  
ATOM   3760 N    N    . ALA ALA ALA A A 476 476 . 88.252  40.305 60.269 1.00 68.95  1 . N  ?  
ATOM   3761 CA   CA   . ALA ALA ALA A A 476 476 . 88.394  39.506 59.060 1.00 68.85  1 . C  ?  
ATOM   3762 C    C    . ALA ALA ALA A A 476 476 . 87.033  39.123 58.497 1.00 69.21  1 . C  ?  
ATOM   3763 O    O    . ALA ALA ALA A A 476 476 . 86.840  39.103 57.275 1.00 66.48  1 . O  ?  
ATOM   3764 CB   CB   . ALA ALA ALA A A 476 476 . 89.227  38.258 59.353 1.00 68.37  1 . C  ?  
ATOM   3765 N    N    . MET MET MET A A 477 477 . 86.081  38.797 59.371 1.00 69.41  1 . N  ?  
ATOM   3766 CA   CA   . MET MET MET A A 477 477 . 84.734  38.492 58.913 1.00 64.31  1 . C  ?  
ATOM   3767 C    C    . MET MET MET A A 477 477 . 84.067  39.710 58.286 1.00 67.55  1 . C  ?  
ATOM   3768 O    O    . MET MET MET A A 477 477 . 83.318  39.572 57.311 1.00 66.57  1 . O  ?  
ATOM   3769 CB   CB   . MET MET MET A A 477 477 . 83.912  37.964 60.075 1.00 64.86  1 . C  ?  
ATOM   3770 CG   CG   . MET MET MET A A 477 477 . 84.459  36.684 60.629 1.00 66.93  1 . C  ?  
ATOM   3771 SD   SD   . MET MET MET A A 477 477 . 83.183  35.441 60.576 1.00 73.62  1 . S  ?  
ATOM   3772 CE   CE   . MET MET MET A A 477 477 . 84.100  33.934 60.889 1.00 67.43  1 . C  ?  
ATOM   3773 N    N    . ALA ALA ALA A A 478 478 . 84.340  40.906 58.816 1.00 63.79  1 . N  ?  
ATOM   3774 CA   CA   . ALA ALA ALA A A 478 478 . 83.806  42.117 58.214 1.00 58.75  1 . C  ?  
ATOM   3775 C    C    . ALA ALA ALA A A 478 478 . 84.486  42.436 56.891 1.00 61.48  1 . C  ?  
ATOM   3776 O    O    . ALA ALA ALA A A 478 478 . 83.885  43.080 56.026 1.00 62.44  1 . O  ?  
ATOM   3777 CB   CB   . ALA ALA ALA A A 478 478 . 83.952  43.287 59.183 1.00 58.91  1 . C  ?  
ATOM   3778 N    N    . LYS LYS LYS A A 479 479 . 85.741  42.024 56.715 1.00 65.95  1 . N  ?  
ATOM   3779 CA   CA   . LYS LYS LYS A A 479 479 . 86.387  42.246 55.428 1.00 60.92  1 . C  ?  
ATOM   3780 C    C    . LYS LYS LYS A A 479 479 . 85.774  41.352 54.359 1.00 57.20  1 . C  ?  
ATOM   3781 O    O    . LYS LYS LYS A A 479 479 . 85.598  41.774 53.209 1.00 55.96  1 . O  ?  
ATOM   3782 CB   CB   . LYS LYS LYS A A 479 479 . 87.892  42.005 55.535 1.00 59.47  1 . C  ?  
ATOM   3783 CG   CG   . LYS LYS LYS A A 479 479 . 88.657  42.523 54.333 1.00 60.26  1 . C  ?  
ATOM   3784 CD   CD   . LYS LYS LYS A A 479 479 . 90.081  42.005 54.301 1.00 75.19  1 . C  ?  
ATOM   3785 CE   CE   . LYS LYS LYS A A 479 479 . 90.277  40.996 53.159 1.00 78.97  1 . C  ?  
ATOM   3786 NZ   NZ   . LYS LYS LYS A A 479 479 . 89.932  41.565 51.809 1.00 80.18  1 . N  ?  
ATOM   3787 N    N    . PHE PHE PHE A A 480 480 . 85.446  40.110 54.721 1.00 55.62  1 . N  ?  
ATOM   3788 CA   CA   . PHE PHE PHE A A 480 480 . 84.710  39.237 53.814 1.00 53.78  1 . C  ?  
ATOM   3789 C    C    . PHE PHE PHE A A 480 480 . 83.308  39.777 53.537 1.00 55.76  1 . C  ?  
ATOM   3790 O    O    . PHE PHE PHE A A 480 480 . 82.815  39.698 52.405 1.00 51.18  1 . O  ?  
ATOM   3791 CB   CB   . PHE PHE PHE A A 480 480 . 84.644  37.828 54.395 1.00 57.61  1 . C  ?  
ATOM   3792 CG   CG   . PHE PHE PHE A A 480 480 . 85.828  36.973 54.044 1.00 57.55  1 . C  ?  
ATOM   3793 CD1  CD1  . PHE PHE PHE A A 480 480 . 87.115  37.498 54.069 1.00 60.27  1 . C  ?  
ATOM   3794 CD2  CD2  . PHE PHE PHE A A 480 480 . 85.659  35.645 53.699 1.00 54.14  1 . C  ?  
ATOM   3795 CE1  CE1  . PHE PHE PHE A A 480 480 . 88.214  36.712 53.742 1.00 63.26  1 . C  ?  
ATOM   3796 CE2  CE2  . PHE PHE PHE A A 480 480 . 86.755  34.852 53.375 1.00 56.56  1 . C  ?  
ATOM   3797 CZ   CZ   . PHE PHE PHE A A 480 480 . 88.033  35.387 53.397 1.00 52.51  1 . C  ?  
ATOM   3798 N    N    . GLN GLN GLN A A 481 481 . 82.650  40.345 54.549 1.00 59.20  1 . N  ?  
ATOM   3799 CA   CA   . GLN GLN GLN A A 481 481 . 81.351  40.952 54.284 1.00 58.11  1 . C  ?  
ATOM   3800 C    C    . GLN GLN GLN A A 481 481 . 81.460  42.042 53.230 1.00 54.65  1 . C  ?  
ATOM   3801 O    O    . GLN GLN GLN A A 481 481 . 80.569  42.174 52.383 1.00 50.94  1 . O  ?  
ATOM   3802 CB   CB   . GLN GLN GLN A A 481 481 . 80.742  41.498 55.570 1.00 55.56  1 . C  ?  
ATOM   3803 CG   CG   . GLN GLN GLN A A 481 481 . 79.352  40.955 55.818 1.00 64.81  1 . C  ?  
ATOM   3804 CD   CD   . GLN GLN GLN A A 481 481 . 79.314  39.439 55.739 1.00 69.48  1 . C  ?  
ATOM   3805 OE1  OE1  . GLN GLN GLN A A 481 481 . 80.280  38.755 56.112 1.00 71.98  1 . O  ?  
ATOM   3806 NE2  NE2  . GLN GLN GLN A A 481 481 . 78.205  38.901 55.236 1.00 70.08  1 . N  ?  
ATOM   3807 N    N    . ASN ASN ASN A A 482 482 . 82.570  42.786 53.228 1.00 51.56  1 . N  ?  
ATOM   3808 CA   CA   . ASN ASN ASN A A 482 482 . 82.743  43.891 52.289 1.00 51.02  1 . C  ?  
ATOM   3809 C    C    . ASN ASN ASN A A 482 482 . 82.956  43.396 50.868 1.00 50.61  1 . C  ?  
ATOM   3810 O    O    . ASN ASN ASN A A 482 482 . 82.485  44.018 49.904 1.00 46.52  1 . O  ?  
ATOM   3811 CB   CB   . ASN ASN ASN A A 482 482 . 83.920  44.763 52.719 1.00 52.13  1 . C  ?  
ATOM   3812 CG   CG   . ASN ASN ASN A A 482 482 . 83.479  45.965 53.479 1.00 64.78  1 . C  ?  
ATOM   3813 OD1  OD1  . ASN ASN ASN A A 482 482 . 82.444  45.937 54.159 1.00 73.03  1 . O  ?  
ATOM   3814 ND2  ND2  . ASN ASN ASN A A 482 482 . 84.235  47.051 53.357 1.00 73.51  1 . N  ?  
ATOM   3815 N    N    . MET MET MET A A 483 483 . 83.706  42.307 50.710 1.00 49.45  1 . N  ?  
ATOM   3816 CA   CA   . MET MET MET A A 483 483 . 83.867  41.751 49.380 1.00 46.25  1 . C  ?  
ATOM   3817 C    C    . MET MET MET A A 483 483 . 82.533  41.281 48.842 1.00 42.35  1 . C  ?  
ATOM   3818 O    O    . MET MET MET A A 483 483 . 82.281  41.367 47.637 1.00 40.96  1 . O  ?  
ATOM   3819 CB   CB   . MET MET MET A A 483 483 . 84.873  40.597 49.410 1.00 54.60  1 . C  ?  
ATOM   3820 CG   CG   . MET MET MET A A 483 483 . 86.265  41.005 49.843 1.00 47.90  1 . C  ?  
ATOM   3821 SD   SD   . MET MET MET A A 483 483 . 87.247  39.606 50.438 1.00 61.63  1 . S  ?  
ATOM   3822 CE   CE   . MET MET MET A A 483 483 . 87.346  38.560 48.988 1.00 44.42  1 . C  ?  
ATOM   3823 N    N    . ALA ALA ALA A A 484 484 . 81.672  40.767 49.717 1.00 42.36  1 . N  ?  
ATOM   3824 CA   CA   . ALA ALA ALA A A 484 484 . 80.345  40.363 49.279 1.00 42.75  1 . C  ?  
ATOM   3825 C    C    . ALA ALA ALA A A 484 484 . 79.517  41.577 48.863 1.00 42.42  1 . C  ?  
ATOM   3826 O    O    . ALA ALA ALA A A 484 484 . 78.834  41.545 47.834 1.00 43.25  1 . O  ?  
ATOM   3827 CB   CB   . ALA ALA ALA A A 484 484 . 79.657  39.568 50.388 1.00 42.32  1 . C  ?  
ATOM   3828 N    N    . GLU GLU GLU A A 485 485 . 79.590  42.671 49.627 1.00 42.09  1 . N  ?  
ATOM   3829 CA   CA   . GLU GLU GLU A A 485 485 . 78.868  43.880 49.241 1.00 41.31  1 . C  ?  
ATOM   3830 C    C    . GLU GLU GLU A A 485 485 . 79.416  44.458 47.951 1.00 46.40  1 . C  ?  
ATOM   3831 O    O    . GLU GLU GLU A A 485 485 . 78.646  44.861 47.065 1.00 45.24  1 . O  ?  
ATOM   3832 CB   CB   . GLU GLU GLU A A 485 485 . 78.939  44.919 50.352 1.00 45.38  1 . C  ?  
ATOM   3833 CG   CG   . GLU GLU GLU A A 485 485 . 78.390  44.411 51.660 1.00 57.44  1 . C  ?  
ATOM   3834 CD   CD   . GLU GLU GLU A A 485 485 . 78.300  45.497 52.703 1.00 72.66  1 . C  ?  
ATOM   3835 OE1  OE1  . GLU GLU GLU A A 485 485 . 78.880  46.585 52.469 1.00 72.49  1 . O  ?  
ATOM   3836 OE2  OE2  . GLU GLU GLU A A 485 485 . 77.646  45.261 53.749 1.00 79.65  1 . O  ?  
ATOM   3837 N    N    . THR THR THR A A 486 486 . 80.748  44.527 47.839 1.00 43.73  1 . N  ?  
ATOM   3838 CA   CA   . THR THR THR A A 486 486 . 81.355  44.913 46.578 1.00 40.82  1 . C  ?  
ATOM   3839 C    C    . THR THR THR A A 486 486 . 80.853  44.025 45.458 1.00 35.20  1 . C  ?  
ATOM   3840 O    O    . THR THR THR A A 486 486 . 80.478  44.511 44.385 1.00 39.31  1 . O  ?  
ATOM   3841 CB   CB   . THR THR THR A A 486 486 . 82.884  44.853 46.688 1.00 43.23  1 . C  ?  
ATOM   3842 OG1  OG1  . THR THR THR A A 486 486 . 83.320  45.901 47.555 1.00 48.66  1 . O  ?  
ATOM   3843 CG2  CG2  . THR THR THR A A 486 486 . 83.527  45.068 45.336 1.00 33.58  1 . C  ?  
ATOM   3844 N    N    . ALA ALA ALA A A 487 487 . 80.791  42.719 45.712 1.00 37.17  1 . N  ?  
ATOM   3845 CA   CA   . ALA ALA ALA A A 487 487 . 80.379  41.772 44.684 1.00 33.75  1 . C  ?  
ATOM   3846 C    C    . ALA ALA ALA A A 487 487 . 78.923  41.992 44.270 1.00 35.54  1 . C  ?  
ATOM   3847 O    O    . ALA ALA ALA A A 487 487 . 78.612  42.012 43.075 1.00 36.31  1 . O  ?  
ATOM   3848 CB   CB   . ALA ALA ALA A A 487 487 . 80.622  40.350 45.178 1.00 32.20  1 . C  ?  
ATOM   3849 N    N    . TRP TRP TRP A A 488 488 . 78.016  42.207 45.225 1.00 37.13  1 . N  ?  
ATOM   3850 CA   CA   . TRP TRP TRP A A 488 488 . 76.630  42.481 44.829 1.00 38.19  1 . C  ?  
ATOM   3851 C    C    . TRP TRP TRP A A 488 488 . 76.532  43.748 43.985 1.00 35.46  1 . C  ?  
ATOM   3852 O    O    . TRP TRP TRP A A 488 488 . 75.811  43.772 42.981 1.00 32.26  1 . O  ?  
ATOM   3853 CB   CB   . TRP TRP TRP A A 488 488 . 75.707  42.551 46.048 1.00 31.60  1 . C  ?  
ATOM   3854 CG   CG   . TRP TRP TRP A A 488 488 . 75.103  41.206 46.346 1.00 39.34  1 . C  ?  
ATOM   3855 CD1  CD1  . TRP TRP TRP A A 488 488 . 75.421  40.373 47.381 1.00 38.18  1 . C  ?  
ATOM   3856 CD2  CD2  . TRP TRP TRP A A 488 488 . 74.107  40.512 45.564 1.00 37.43  1 . C  ?  
ATOM   3857 NE1  NE1  . TRP TRP TRP A A 488 488 . 74.660  39.228 47.311 1.00 38.89  1 . N  ?  
ATOM   3858 CE2  CE2  . TRP TRP TRP A A 488 488 . 73.855  39.285 46.204 1.00 35.98  1 . C  ?  
ATOM   3859 CE3  CE3  . TRP TRP TRP A A 488 488 . 73.394  40.822 44.398 1.00 34.16  1 . C  ?  
ATOM   3860 CZ2  CZ2  . TRP TRP TRP A A 488 488 . 72.919  38.363 45.722 1.00 36.61  1 . C  ?  
ATOM   3861 CZ3  CZ3  . TRP TRP TRP A A 488 488 . 72.479  39.898 43.908 1.00 33.68  1 . C  ?  
ATOM   3862 CH2  CH2  . TRP TRP TRP A A 488 488 . 72.251  38.681 44.571 1.00 33.10  1 . C  ?  
ATOM   3863 N    N    . LYS LYS LYS A A 489 489 . 77.290  44.796 44.330 1.00 37.16  1 . N  ?  
ATOM   3864 CA   CA   . LYS LYS LYS A A 489 489 . 77.278  45.972 43.466 1.00 34.12  1 . C  ?  
ATOM   3865 C    C    . LYS LYS LYS A A 489 489 . 77.779  45.634 42.073 1.00 35.08  1 . C  ?  
ATOM   3866 O    O    . LYS LYS LYS A A 489 489 . 77.295  46.201 41.090 1.00 39.97  1 . O  ?  
ATOM   3867 CB   CB   . LYS LYS LYS A A 489 489 . 78.099  47.102 44.071 1.00 35.95  1 . C  ?  
ATOM   3868 CG   CG   . LYS LYS LYS A A 489 489 . 77.544  47.610 45.361 1.00 35.79  1 . C  ?  
ATOM   3869 CD   CD   . LYS LYS LYS A A 489 489 . 78.449  48.642 45.975 1.00 40.10  1 . C  ?  
ATOM   3870 CE   CE   . LYS LYS LYS A A 489 489 . 77.958  49.038 47.348 1.00 42.02  1 . C  ?  
ATOM   3871 NZ   NZ   . LYS LYS LYS A A 489 489 . 78.918  49.960 48.000 1.00 51.22  1 . N  ?  
ATOM   3872 N    N    . ASP ASP ASP A A 490 490 . 78.735  44.707 41.967 1.00 36.15  1 . N  ?  
ATOM   3873 CA   CA   . ASP ASP ASP A A 490 490 . 79.254  44.316 40.658 1.00 34.08  1 . C  ?  
ATOM   3874 C    C    . ASP ASP ASP A A 490 490 . 78.236  43.510 39.869 1.00 33.98  1 . C  ?  
ATOM   3875 O    O    . ASP ASP ASP A A 490 490 . 78.082  43.708 38.657 1.00 34.18  1 . O  ?  
ATOM   3876 CB   CB   . ASP ASP ASP A A 490 490 . 80.546  43.521 40.820 1.00 36.03  1 . C  ?  
ATOM   3877 CG   CG   . ASP ASP ASP A A 490 490 . 81.744  44.406 41.098 1.00 44.45  1 . C  ?  
ATOM   3878 OD1  OD1  . ASP ASP ASP A A 490 490 . 81.689  45.626 40.756 1.00 43.02  1 . O  ?  
ATOM   3879 OD2  OD2  . ASP ASP ASP A A 490 490 . 82.743  43.874 41.647 1.00 43.57  1 . O  ?  
ATOM   3880 N    N    . ILE ILE ILE A A 491 491 . 77.529  42.595 40.532 1.00 33.11  1 . N  ?  
ATOM   3881 CA   CA   . ILE ILE ILE A A 491 491 . 76.427  41.902 39.871 1.00 35.84  1 . C  ?  
ATOM   3882 C    C    . ILE ILE ILE A A 491 491 . 75.382  42.894 39.370 1.00 36.36  1 . C  ?  
ATOM   3883 O    O    . ILE ILE ILE A A 491 491 . 74.950  42.830 38.212 1.00 36.22  1 . O  ?  
ATOM   3884 CB   CB   . ILE ILE ILE A A 491 491 . 75.799  40.869 40.809 1.00 35.33  1 . C  ?  
ATOM   3885 CG1  CG1  . ILE ILE ILE A A 491 491 . 76.704  39.644 40.867 1.00 30.58  1 . C  ?  
ATOM   3886 CG2  CG2  . ILE ILE ILE A A 491 491 . 74.421  40.534 40.298 1.00 35.08  1 . C  ?  
ATOM   3887 CD1  CD1  . ILE ILE ILE A A 491 491 . 76.281  38.634 41.857 1.00 35.34  1 . C  ?  
ATOM   3888 N    N    . ASN ASN ASN A A 492 492 . 74.958  43.829 40.231 1.00 34.81  1 . N  ?  
ATOM   3889 CA   CA   . ASN ASN ASN A A 492 492 . 73.935  44.780 39.792 1.00 37.50  1 . C  ?  
ATOM   3890 C    C    . ASN ASN ASN A A 492 492 . 74.446  45.612 38.635 1.00 37.22  1 . C  ?  
ATOM   3891 O    O    . ASN ASN ASN A A 492 492 . 73.694  45.946 37.717 1.00 38.51  1 . O  ?  
ATOM   3892 CB   CB   . ASN ASN ASN A A 492 492 . 73.491  45.695 40.937 1.00 33.90  1 . C  ?  
ATOM   3893 CG   CG   . ASN ASN ASN A A 492 492 . 72.852  44.940 42.056 1.00 30.22  1 . C  ?  
ATOM   3894 OD1  OD1  . ASN ASN ASN A A 492 492 . 72.209  43.915 41.827 1.00 31.25  1 . O  ?  
ATOM   3895 ND2  ND2  . ASN ASN ASN A A 492 492 . 73.046  45.410 43.282 1.00 30.31  1 . N  ?  
ATOM   3896 N    N    . GLU GLU GLU A A 493 493 . 75.728  45.941 38.647 1.00 40.16  1 . N  ?  
ATOM   3897 CA   CA   . GLU GLU GLU A A 493 493 . 76.268  46.714 37.538 1.00 40.36  1 . C  ?  
ATOM   3898 C    C    . GLU GLU GLU A A 493 493 . 76.296  45.879 36.267 1.00 38.85  1 . C  ?  
ATOM   3899 O    O    . GLU GLU GLU A A 493 493 . 75.992  46.383 35.181 1.00 39.85  1 . O  ?  
ATOM   3900 CB   CB   . GLU GLU GLU A A 493 493 . 77.647  47.213 37.913 1.00 40.68  1 . C  ?  
ATOM   3901 CG   CG   . GLU GLU GLU A A 493 493 . 78.236  48.181 36.968 1.00 49.15  1 . C  ?  
ATOM   3902 CD   CD   . GLU GLU GLU A A 493 493 . 79.408  48.874 37.595 1.00 51.88  1 . C  ?  
ATOM   3903 OE1  OE1  . GLU GLU GLU A A 493 493 . 79.208  49.508 38.663 1.00 50.61  1 . O  ?  
ATOM   3904 OE2  OE2  . GLU GLU GLU A A 493 493 . 80.520  48.753 37.039 1.00 57.69  1 . O  ?  
ATOM   3905 N    N    . GLY GLY GLY A A 494 494 . 76.602  44.580 36.399 1.00 39.38  1 . N  ?  
ATOM   3906 CA   CA   . GLY GLY GLY A A 494 494 . 76.652  43.660 35.273 1.00 30.66  1 . C  ?  
ATOM   3907 C    C    . GLY GLY GLY A A 494 494 . 75.322  43.396 34.600 1.00 41.69  1 . C  ?  
ATOM   3908 O    O    . GLY GLY GLY A A 494 494 . 75.299  42.895 33.473 1.00 46.08  1 . O  ?  
ATOM   3909 N    N    . LEU LEU LEU A A 495 495 . 74.209  43.729 35.251 1.00 42.87  1 . N  ?  
ATOM   3910 CA   CA   . LEU LEU LEU A A 495 495 . 72.912  43.614 34.596 1.00 41.91  1 . C  ?  
ATOM   3911 C    C    . LEU LEU LEU A A 495 495 . 72.540  44.836 33.759 1.00 42.50  1 . C  ?  
ATOM   3912 O    O    . LEU LEU LEU A A 495 495 . 71.533  44.783 33.041 1.00 42.27  1 . O  ?  
ATOM   3913 CB   CB   . LEU LEU LEU A A 495 495 . 71.802  43.347 35.636 1.00 42.18  1 . C  ?  
ATOM   3914 CG   CG   . LEU LEU LEU A A 495 495 . 72.011  42.113 36.527 1.00 41.01  1 . C  ?  
ATOM   3915 CD1  CD1  . LEU LEU LEU A A 495 495 . 71.067  42.099 37.715 1.00 32.01  1 . C  ?  
ATOM   3916 CD2  CD2  . LEU LEU LEU A A 495 495 . 71.915  40.822 35.724 1.00 36.28  1 . C  ?  
ATOM   3917 N    N    . LEU LEU LEU A A 496 496 . 73.319  45.924 33.814 1.00 42.12  1 . N  ?  
ATOM   3918 CA   CA   . LEU LEU LEU A A 496 496 . 72.931  47.159 33.136 1.00 40.59  1 . C  ?  
ATOM   3919 C    C    . LEU LEU LEU A A 496 496 . 73.209  47.089 31.640 1.00 40.11  1 . C  ?  
ATOM   3920 O    O    . LEU LEU LEU A A 496 496 . 74.243  46.578 31.207 1.00 42.61  1 . O  ?  
ATOM   3921 CB   CB   . LEU LEU LEU A A 496 496 . 73.655  48.361 33.744 1.00 37.65  1 . C  ?  
ATOM   3922 CG   CG   . LEU LEU LEU A A 496 496 . 73.213  48.649 35.178 1.00 40.72  1 . C  ?  
ATOM   3923 CD1  CD1  . LEU LEU LEU A A 496 496 . 74.003  49.772 35.797 1.00 36.80  1 . C  ?  
ATOM   3924 CD2  CD2  . LEU LEU LEU A A 496 496 . 71.704  48.918 35.260 1.00 37.61  1 . C  ?  
ATOM   3925 N    N    . ARG ARG ARG A A 497 497 . 72.274  47.608 30.851 1.00 42.02  1 . N  ?  
ATOM   3926 CA   CA   . ARG ARG ARG A A 497 497 . 72.450  47.675 29.405 1.00 43.59  1 . C  ?  
ATOM   3927 C    C    . ARG ARG ARG A A 497 497 . 73.468  48.744 29.032 1.00 44.03  1 . C  ?  
ATOM   3928 O    O    . ARG ARG ARG A A 497 497 . 73.628  49.725 29.749 1.00 42.47  1 . O  ?  
ATOM   3929 CB   CB   . ARG ARG ARG A A 497 497 . 71.126  47.967 28.725 1.00 38.98  1 . C  ?  
ATOM   3930 CG   CG   . ARG ARG ARG A A 497 497 . 70.001  47.128 29.254 1.00 44.66  1 . C  ?  
ATOM   3931 CD   CD   . ARG ARG ARG A A 497 497 . 68.674  47.563 28.687 1.00 45.13  1 . C  ?  
ATOM   3932 NE   NE   . ARG ARG ARG A A 497 497 . 67.609  46.670 29.129 1.00 50.28  1 . N  ?  
ATOM   3933 CZ   CZ   . ARG ARG ARG A A 497 497 . 66.442  46.546 28.512 1.00 49.30  1 . C  ?  
ATOM   3934 NH1  NH1  . ARG ARG ARG A A 497 497 . 66.195  47.258 27.423 1.00 56.15  1 . N  ?  
ATOM   3935 NH2  NH2  . ARG ARG ARG A A 497 497 . 65.528  45.712 28.978 1.00 51.94  1 . N  ?  
ATOM   3936 N    N    . PRO PRO PRO A A 498 498 . 74.179  48.543 27.919 1.00 44.33  1 . N  ?  
ATOM   3937 CA   CA   . PRO PRO PRO A A 498 498 . 74.136  47.354 27.057 1.00 46.42  1 . C  ?  
ATOM   3938 C    C    . PRO PRO PRO A A 498 498 . 74.835  46.145 27.693 1.00 47.90  1 . C  ?  
ATOM   3939 O    O    . PRO PRO PRO A A 498 498 . 75.981  46.293 28.115 1.00 49.77  1 . O  ?  
ATOM   3940 CB   CB   . PRO PRO PRO A A 498 498 . 74.897  47.808 25.814 1.00 49.12  1 . C  ?  
ATOM   3941 CG   CG   . PRO PRO PRO A A 498 498 . 75.911  48.774 26.366 1.00 49.48  1 . C  ?  
ATOM   3942 CD   CD   . PRO PRO PRO A A 498 498 . 75.194  49.512 27.471 1.00 45.02  1 . C  ?  
ATOM   3943 N    N    . THR THR THR A A 499 499 . 74.163  44.976 27.759 1.00 47.24  1 . N  ?  
ATOM   3944 CA   CA   . THR THR THR A A 499 499 . 74.737  43.782 28.377 1.00 45.38  1 . C  ?  
ATOM   3945 C    C    . THR THR THR A A 499 499 . 75.689  43.077 27.416 1.00 43.68  1 . C  ?  
ATOM   3946 O    O    . THR THR THR A A 499 499 . 75.497  43.120 26.201 1.00 48.65  1 . O  ?  
ATOM   3947 CB   CB   . THR THR THR A A 499 499 . 73.642  42.809 28.795 1.00 42.38  1 . C  ?  
ATOM   3948 OG1  OG1  . THR THR THR A A 499 499 . 72.900  42.403 27.638 1.00 42.82  1 . O  ?  
ATOM   3949 CG2  CG2  . THR THR THR A A 499 499 . 72.679  43.464 29.785 1.00 43.85  1 . C  ?  
ATOM   3950 N    N    . PRO PRO PRO A A 500 500 . 76.720  42.414 27.933 1.00 41.55  1 . N  ?  
ATOM   3951 CA   CA   . PRO PRO PRO A A 500 500 . 77.686  41.755 27.040 1.00 42.62  1 . C  ?  
ATOM   3952 C    C    . PRO PRO PRO A A 500 500 . 77.128  40.510 26.359 1.00 48.05  1 . C  ?  
ATOM   3953 O    O    . PRO PRO PRO A A 500 500 . 77.648  40.094 25.312 1.00 46.43  1 . O  ?  
ATOM   3954 CB   CB   . PRO PRO PRO A A 500 500 . 78.851  41.411 27.980 1.00 40.43  1 . C  ?  
ATOM   3955 CG   CG   . PRO PRO PRO A A 500 500 . 78.218  41.270 29.337 1.00 43.75  1 . C  ?  
ATOM   3956 CD   CD   . PRO PRO PRO A A 500 500 . 76.993  42.157 29.360 1.00 43.08  1 . C  ?  
ATOM   3957 N    N    . VAL VAL VAL A A 501 501 . 76.102  39.895 26.940 1.00 44.56  1 . N  ?  
ATOM   3958 CA   CA   . VAL VAL VAL A A 501 501 . 75.372  38.783 26.352 1.00 43.55  1 . C  ?  
ATOM   3959 C    C    . VAL VAL VAL A A 501 501 . 73.896  39.037 26.629 1.00 43.78  1 . C  ?  
ATOM   3960 O    O    . VAL VAL VAL A A 501 501 . 73.538  39.974 27.340 1.00 43.22  1 . O  ?  
ATOM   3961 CB   CB   . VAL VAL VAL A A 501 501 . 75.819  37.424 26.936 1.00 46.84  1 . C  ?  
ATOM   3962 CG1  CG1  . VAL VAL VAL A A 501 501 . 77.263  37.128 26.577 1.00 42.64  1 . C  ?  
ATOM   3963 CG2  CG2  . VAL VAL VAL A A 501 501 . 75.623  37.401 28.464 1.00 41.64  1 . C  ?  
ATOM   3964 N    N    . SER SER SER A A 502 502 . 73.029  38.190 26.077 1.00 44.38  1 . N  ?  
ATOM   3965 CA   CA   . SER SER SER A A 502 502 . 71.610  38.319 26.386 1.00 44.13  1 . C  ?  
ATOM   3966 C    C    . SER SER SER A A 502 502 . 71.376  38.165 27.881 1.00 46.39  1 . C  ?  
ATOM   3967 O    O    . SER SER SER A A 502 502 . 71.992  37.322 28.547 1.00 47.78  1 . O  ?  
ATOM   3968 CB   CB   . SER SER SER A A 502 502 . 70.783  37.278 25.639 1.00 51.28  1 . C  ?  
ATOM   3969 OG   OG   . SER SER SER A A 502 502 . 70.833  37.495 24.246 1.00 69.96  1 . O  ?  
ATOM   3970 N    N    . THR THR THR A A 503 503 . 70.482  39.002 28.405 1.00 44.91  1 . N  ?  
ATOM   3971 CA   CA   . THR THR THR A A 503 503 . 70.054  38.879 29.794 1.00 46.84  1 . C  ?  
ATOM   3972 C    C    . THR THR THR A A 503 503 . 69.684  37.443 30.155 1.00 41.20  1 . C  ?  
ATOM   3973 O    O    . THR THR THR A A 503 503 . 69.872  37.012 31.302 1.00 38.35  1 . O  ?  
ATOM   3974 CB   CB   . THR THR THR A A 503 503 . 68.882  39.829 30.039 1.00 40.60  1 . C  ?  
ATOM   3975 OG1  OG1  . THR THR THR A A 503 503 . 69.412  41.136 30.285 1.00 56.58  1 . O  ?  
ATOM   3976 CG2  CG2  . THR THR THR A A 503 503 . 68.069  39.403 31.219 1.00 35.23  1 . C  ?  
ATOM   3977 N    N    . GLU GLU GLU A A 504 504 . 69.182  36.680 29.196 1.00 39.24  1 . N  ?  
ATOM   3978 CA   CA   . GLU GLU GLU A A 504 504 . 68.857  35.291 29.491 1.00 40.31  1 . C  ?  
ATOM   3979 C    C    . GLU GLU GLU A A 504 504 . 70.070  34.526 30.017 1.00 44.24  1 . C  ?  
ATOM   3980 O    O    . GLU GLU GLU A A 504 504 . 69.921  33.577 30.796 1.00 43.71  1 . O  ?  
ATOM   3981 CB   CB   . GLU GLU GLU A A 504 504 . 68.304  34.627 28.239 1.00 41.95  1 . C  ?  
ATOM   3982 CG   CG   . GLU GLU GLU A A 504 504 . 67.916  33.194 28.427 1.00 46.53  1 . C  ?  
ATOM   3983 CD   CD   . GLU GLU GLU A A 504 504 . 67.614  32.552 27.104 1.00 53.41  1 . C  ?  
ATOM   3984 OE1  OE1  . GLU GLU GLU A A 504 504 . 68.010  33.161 26.080 1.00 54.97  1 . O  ?  
ATOM   3985 OE2  OE2  . GLU GLU GLU A A 504 504 . 66.983  31.465 27.088 1.00 53.61  1 . O  ?  
ATOM   3986 N    N    . PHE PHE PHE A A 505 505 . 71.276  34.918 29.620 1.00 44.38  1 . N  ?  
ATOM   3987 CA   CA   . PHE PHE PHE A A 505 505 . 72.466  34.230 30.086 1.00 42.57  1 . C  ?  
ATOM   3988 C    C    . PHE PHE PHE A A 505 505 . 73.104  34.913 31.271 1.00 40.10  1 . C  ?  
ATOM   3989 O    O    . PHE PHE PHE A A 505 505 . 74.070  34.376 31.820 1.00 38.87  1 . O  ?  
ATOM   3990 CB   CB   . PHE PHE PHE A A 505 505 . 73.461  34.061 28.940 1.00 40.89  1 . C  ?  
ATOM   3991 CG   CG   . PHE PHE PHE A A 505 505 . 72.870  33.324 27.775 1.00 47.42  1 . C  ?  
ATOM   3992 CD1  CD1  . PHE PHE PHE A A 505 505 . 72.530  31.986 27.897 1.00 49.81  1 . C  ?  
ATOM   3993 CD2  CD2  . PHE PHE PHE A A 505 505 . 72.583  33.976 26.587 1.00 48.22  1 . C  ?  
ATOM   3994 CE1  CE1  . PHE PHE PHE A A 505 505 . 71.948  31.307 26.842 1.00 52.55  1 . C  ?  
ATOM   3995 CE2  CE2  . PHE PHE PHE A A 505 505 . 72.012  33.305 25.532 1.00 49.48  1 . C  ?  
ATOM   3996 CZ   CZ   . PHE PHE PHE A A 505 505 . 71.690  31.973 25.658 1.00 53.11  1 . C  ?  
ATOM   3997 N    N    . LEU LEU LEU A A 506 506 . 72.559  36.059 31.700 1.00 41.81  1 . N  ?  
ATOM   3998 CA   CA   . LEU LEU LEU A A 506 506 . 72.979  36.739 32.922 1.00 36.21  1 . C  ?  
ATOM   3999 C    C    . LEU LEU LEU A A 506 506 . 72.185  36.287 34.135 1.00 37.03  1 . C  ?  
ATOM   4000 O    O    . LEU LEU LEU A A 506 506 . 72.751  36.155 35.229 1.00 37.07  1 . O  ?  
ATOM   4001 CB   CB   . LEU LEU LEU A A 506 506 . 72.839  38.256 32.776 1.00 36.48  1 . C  ?  
ATOM   4002 CG   CG   . LEU LEU LEU A A 506 506 . 73.800  38.902 31.795 1.00 41.59  1 . C  ?  
ATOM   4003 CD1  CD1  . LEU LEU LEU A A 506 506 . 73.662  40.409 31.827 1.00 39.41  1 . C  ?  
ATOM   4004 CD2  CD2  . LEU LEU LEU A A 506 506 . 75.223  38.467 32.114 1.00 40.96  1 . C  ?  
ATOM   4005 N    N    . THR THR THR A A 507 507 . 70.881  36.052 33.970 1.00 36.76  1 . N  ?  
ATOM   4006 CA   CA   . THR THR THR A A 507 507 . 70.056  35.675 35.115 1.00 34.49  1 . C  ?  
ATOM   4007 C    C    . THR THR THR A A 507 507 . 70.558  34.432 35.842 1.00 33.80  1 . C  ?  
ATOM   4008 O    O    . THR THR THR A A 507 507 . 70.515  34.425 37.084 1.00 32.72  1 . O  ?  
ATOM   4009 CB   CB   . THR THR THR A A 507 507 . 68.601  35.489 34.678 1.00 36.36  1 . C  ?  
ATOM   4010 OG1  OG1  . THR THR THR A A 507 507 . 68.122  36.729 34.165 1.00 39.25  1 . O  ?  
ATOM   4011 CG2  CG2  . THR THR THR A A 507 507 . 67.732  35.054 35.862 1.00 34.01  1 . C  ?  
ATOM   4012 N    N    . PRO PRO PRO A A 508 508 . 71.040  33.379 35.166 1.00 35.77  1 . N  ?  
ATOM   4013 CA   CA   . PRO PRO PRO A A 508 508 . 71.521  32.209 35.928 1.00 34.99  1 . C  ?  
ATOM   4014 C    C    . PRO PRO PRO A A 508 508 . 72.636  32.558 36.894 1.00 36.55  1 . C  ?  
ATOM   4015 O    O    . PRO PRO PRO A A 508 508 . 72.682  32.023 38.011 1.00 36.12  1 . O  ?  
ATOM   4016 CB   CB   . PRO PRO PRO A A 508 508 . 71.990  31.237 34.835 1.00 28.83  1 . C  ?  
ATOM   4017 CG   CG   . PRO PRO PRO A A 508 508 . 71.278  31.631 33.630 1.00 34.21  1 . C  ?  
ATOM   4018 CD   CD   . PRO PRO PRO A A 508 508 . 71.098  33.143 33.715 1.00 36.42  1 . C  ?  
ATOM   4019 N    N    . ILE ILE ILE A A 509 509 . 73.534  33.458 36.492 1.00 38.35  1 . N  ?  
ATOM   4020 CA   CA   . ILE ILE ILE A A 509 509 . 74.645  33.853 37.352 1.00 35.50  1 . C  ?  
ATOM   4021 C    C    . ILE ILE ILE A A 509 509 . 74.123  34.580 38.580 1.00 38.15  1 . C  ?  
ATOM   4022 O    O    . ILE ILE ILE A A 509 509 . 74.548  34.303 39.713 1.00 34.08  1 . O  ?  
ATOM   4023 CB   CB   . ILE ILE ILE A A 509 509 . 75.636  34.723 36.561 1.00 36.11  1 . C  ?  
ATOM   4024 CG1  CG1  . ILE ILE ILE A A 509 509 . 76.370  33.863 35.536 1.00 38.41  1 . C  ?  
ATOM   4025 CG2  CG2  . ILE ILE ILE A A 509 509 . 76.576  35.469 37.509 1.00 37.00  1 . C  ?  
ATOM   4026 CD1  CD1  . ILE ILE ILE A A 509 509 . 76.953  34.644 34.401 1.00 40.76  1 . C  ?  
ATOM   4027 N    N    . LEU LEU LEU A A 510 510 . 73.197  35.532 38.363 1.00 35.19  1 . N  ?  
ATOM   4028 CA   CA   . LEU LEU LEU A A 510 510 . 72.536  36.230 39.460 1.00 27.43  1 . C  ?  
ATOM   4029 C    C    . LEU LEU LEU A A 510 510 . 71.796  35.254 40.366 1.00 35.80  1 . C  ?  
ATOM   4030 O    O    . LEU LEU LEU A A 510 510 . 71.880  35.344 41.599 1.00 34.35  1 . O  ?  
ATOM   4031 CB   CB   . LEU LEU LEU A A 510 510 . 71.574  37.265 38.890 1.00 32.94  1 . C  ?  
ATOM   4032 CG   CG   . LEU LEU LEU A A 510 510 . 70.429  37.818 39.752 1.00 34.02  1 . C  ?  
ATOM   4033 CD1  CD1  . LEU LEU LEU A A 510 510 . 70.970  38.632 40.925 1.00 32.64  1 . C  ?  
ATOM   4034 CD2  CD2  . LEU LEU LEU A A 510 510 . 69.511  38.652 38.885 1.00 29.95  1 . C  ?  
ATOM   4035 N    N    . ASN ASN ASN A A 511 511 . 71.089  34.287 39.775 1.00 33.96  1 . N  ?  
ATOM   4036 CA   CA   . ASN ASN ASN A A 511 511 . 70.383  33.316 40.598 1.00 31.50  1 . C  ?  
ATOM   4037 C    C    . ASN ASN ASN A A 511 511 . 71.335  32.431 41.390 1.00 35.54  1 . C  ?  
ATOM   4038 O    O    . ASN ASN ASN A A 511 511 . 70.978  31.985 42.489 1.00 34.64  1 . O  ?  
ATOM   4039 CB   CB   . ASN ASN ASN A A 511 511 . 69.440  32.490 39.726 1.00 35.90  1 . C  ?  
ATOM   4040 CG   CG   . ASN ASN ASN A A 511 511 . 68.232  33.291 39.299 1.00 36.94  1 . C  ?  
ATOM   4041 OD1  OD1  . ASN ASN ASN A A 511 511 . 67.911  34.290 39.937 1.00 38.06  1 . O  ?  
ATOM   4042 ND2  ND2  . ASN ASN ASN A A 511 511 . 67.571  32.883 38.221 1.00 38.11  1 . N  ?  
ATOM   4043 N    N    . LEU LEU LEU A A 512 512 . 72.546  32.176 40.866 1.00 39.01  1 . N  ?  
ATOM   4044 CA   CA   . LEU LEU LEU A A 512 512 . 73.566  31.456 41.638 1.00 34.09  1 . C  ?  
ATOM   4045 C    C    . LEU LEU LEU A A 512 512 . 73.930  32.205 42.913 1.00 34.14  1 . C  ?  
ATOM   4046 O    O    . LEU LEU LEU A A 512 512 . 74.082  31.595 43.976 1.00 38.19  1 . O  ?  
ATOM   4047 CB   CB   . LEU LEU LEU A A 512 512 . 74.810  31.217 40.784 1.00 35.56  1 . C  ?  
ATOM   4048 CG   CG   . LEU LEU LEU A A 512 512 . 74.670  30.057 39.790 1.00 39.34  1 . C  ?  
ATOM   4049 CD1  CD1  . LEU LEU LEU A A 512 512 . 75.753  30.077 38.698 1.00 34.75  1 . C  ?  
ATOM   4050 CD2  CD2  . LEU LEU LEU A A 512 512 . 74.696  28.736 40.555 1.00 35.07  1 . C  ?  
ATOM   4051 N    N    . ALA ALA ALA A A 513 513 . 74.053  33.533 42.835 1.00 33.60  1 . N  ?  
ATOM   4052 CA   CA   . ALA ALA ALA A A 513 513 . 74.304  34.316 44.040 1.00 32.28  1 . C  ?  
ATOM   4053 C    C    . ALA ALA ALA A A 513 513 . 73.116  34.273 44.993 1.00 37.01  1 . C  ?  
ATOM   4054 O    O    . ALA ALA ALA A A 513 513 . 73.297  34.205 46.214 1.00 38.29  1 . O  ?  
ATOM   4055 CB   CB   . ALA ALA ALA A A 513 513 . 74.634  35.756 43.669 1.00 33.10  1 . C  ?  
ATOM   4056 N    N    . ARG ARG ARG A A 514 514 . 71.892  34.341 44.460 1.00 34.55  1 . N  ?  
ATOM   4057 CA   CA   . ARG ARG ARG A A 514 514 . 70.708  34.240 45.307 1.00 33.72  1 . C  ?  
ATOM   4058 C    C    . ARG ARG ARG A A 514 514 . 70.684  32.915 46.052 1.00 35.23  1 . C  ?  
ATOM   4059 O    O    . ARG ARG ARG A A 514 514 . 70.459  32.862 47.268 1.00 34.48  1 . O  ?  
ATOM   4060 CB   CB   . ARG ARG ARG A A 514 514 . 69.453  34.395 44.446 1.00 33.16  1 . C  ?  
ATOM   4061 CG   CG   . ARG ARG ARG A A 514 514 . 69.227  35.810 43.946 1.00 38.41  1 . C  ?  
ATOM   4062 CD   CD   . ARG ARG ARG A A 514 514 . 68.353  35.852 42.717 1.00 35.34  1 . C  ?  
ATOM   4063 NE   NE   . ARG ARG ARG A A 514 514 . 67.900  37.210 42.493 1.00 36.73  1 . N  ?  
ATOM   4064 CZ   CZ   . ARG ARG ARG A A 514 514 . 67.195  37.602 41.439 1.00 38.68  1 . C  ?  
ATOM   4065 NH1  NH1  . ARG ARG ARG A A 514 514 . 66.879  36.733 40.491 1.00 36.87  1 . N  ?  
ATOM   4066 NH2  NH2  . ARG ARG ARG A A 514 514 . 66.819  38.868 41.334 1.00 35.96  1 . N  ?  
ATOM   4067 N    N    . ILE ILE ILE A A 515 515 . 70.899  31.829 45.318 1.00 36.20  1 . N  ?  
ATOM   4068 CA   CA   . ILE ILE ILE A A 515 515 . 70.884  30.482 45.887 1.00 41.91  1 . C  ?  
ATOM   4069 C    C    . ILE ILE ILE A A 515 515 . 71.829  30.383 47.074 1.00 40.22  1 . C  ?  
ATOM   4070 O    O    . ILE ILE ILE A A 515 515 . 71.494  29.789 48.106 1.00 40.46  1 . O  ?  
ATOM   4071 CB   CB   . ILE ILE ILE A A 515 515 . 71.227  29.474 44.778 1.00 39.12  1 . C  ?  
ATOM   4072 CG1  CG1  . ILE ILE ILE A A 515 515 . 69.944  29.089 44.066 1.00 39.52  1 . C  ?  
ATOM   4073 CG2  CG2  . ILE ILE ILE A A 515 515 . 71.991  28.301 45.290 1.00 40.99  1 . C  ?  
ATOM   4074 CD1  CD1  . ILE ILE ILE A A 515 515 . 70.204  28.663 42.638 1.00 54.30  1 . C  ?  
ATOM   4075 N    N    . VAL VAL VAL A A 516 516 . 73.007  30.995 46.963 1.00 40.15  1 . N  ?  
ATOM   4076 CA   CA   . VAL VAL VAL A A 516 516 . 73.973  30.943 48.056 1.00 43.28  1 . C  ?  
ATOM   4077 C    C    . VAL VAL VAL A A 516 516 . 73.450  31.714 49.264 1.00 38.79  1 . C  ?  
ATOM   4078 O    O    . VAL VAL VAL A A 516 516 . 73.467  31.217 50.393 1.00 41.87  1 . O  ?  
ATOM   4079 CB   CB   . VAL VAL VAL A A 516 516 . 75.351  31.451 47.567 1.00 41.66  1 . C  ?  
ATOM   4080 CG1  CG1  . VAL VAL VAL A A 516 516 . 75.880  32.625 48.394 1.00 39.96  1 . C  ?  
ATOM   4081 CG2  CG2  . VAL VAL VAL A A 516 516 . 76.322  30.313 47.621 1.00 49.29  1 . C  ?  
ATOM   4082 N    N    . GLU GLU GLU A A 517 517 . 72.952  32.928 49.044 1.00 39.61  1 . N  ?  
ATOM   4083 CA   CA   . GLU GLU GLU A A 517 517 . 72.391  33.718 50.139 1.00 42.21  1 . C  ?  
ATOM   4084 C    C    . GLU GLU GLU A A 517 517 . 71.244  32.992 50.836 1.00 45.44  1 . C  ?  
ATOM   4085 O    O    . GLU GLU GLU A A 517 517 . 71.159  32.975 52.069 1.00 48.12  1 . O  ?  
ATOM   4086 CB   CB   . GLU GLU GLU A A 517 517 . 71.903  35.052 49.599 1.00 39.82  1 . C  ?  
ATOM   4087 CG   CG   . GLU GLU GLU A A 517 517 . 72.992  35.868 48.957 1.00 43.24  1 . C  ?  
ATOM   4088 CD   CD   . GLU GLU GLU A A 517 517 . 73.698  36.757 49.948 1.00 44.67  1 . C  ?  
ATOM   4089 OE1  OE1  . GLU GLU GLU A A 517 517 . 73.624  36.474 51.164 1.00 50.19  1 . O  ?  
ATOM   4090 OE2  OE2  . GLU GLU GLU A A 517 517 . 74.324  37.740 49.506 1.00 48.32  1 . O  ?  
ATOM   4091 N    N    . VAL VAL VAL A A 518 518 . 70.340  32.401 50.061 1.00 39.90  1 . N  ?  
ATOM   4092 CA   CA   . VAL VAL VAL A A 518 518 . 69.178  31.759 50.654 1.00 42.95  1 . C  ?  
ATOM   4093 C    C    . VAL VAL VAL A A 518 518 . 69.560  30.473 51.382 1.00 51.97  1 . C  ?  
ATOM   4094 O    O    . VAL VAL VAL A A 518 518 . 68.926  30.108 52.381 1.00 52.79  1 . O  ?  
ATOM   4095 CB   CB   . VAL VAL VAL A A 518 518 . 68.133  31.511 49.555 1.00 40.08  1 . C  ?  
ATOM   4096 CG1  CG1  . VAL VAL VAL A A 518 518 . 67.060  30.550 50.036 1.00 38.01  1 . C  ?  
ATOM   4097 CG2  CG2  . VAL VAL VAL A A 518 518 . 67.567  32.843 49.079 1.00 36.84  1 . C  ?  
ATOM   4098 N    N    . THR THR THR A A 519 519 . 70.591  29.760 50.905 1.00 50.46  1 . N  ?  
ATOM   4099 CA   CA   . THR THR THR A A 519 519 . 70.941  28.486 51.526 1.00 47.52  1 . C  ?  
ATOM   4100 C    C    . THR THR THR A A 519 519 . 71.750  28.662 52.803 1.00 50.33  1 . C  ?  
ATOM   4101 O    O    . THR THR THR A A 519 519 . 71.670  27.813 53.695 1.00 51.82  1 . O  ?  
ATOM   4102 CB   CB   . THR THR THR A A 519 519 . 71.713  27.610 50.548 1.00 46.88  1 . C  ?  
ATOM   4103 OG1  OG1  . THR THR THR A A 519 519 . 70.898  27.340 49.400 1.00 45.52  1 . O  ?  
ATOM   4104 CG2  CG2  . THR THR THR A A 519 519 . 72.070  26.299 51.209 1.00 50.25  1 . C  ?  
ATOM   4105 N    N    . TYR TYR TYR A A 520 520 . 72.525  29.743 52.916 1.00 50.91  1 . N  ?  
ATOM   4106 CA   CA   . TYR TYR TYR A A 520 520 . 73.324  30.021 54.106 1.00 53.19  1 . C  ?  
ATOM   4107 C    C    . TYR TYR TYR A A 520 520 . 72.742  31.164 54.928 1.00 55.66  1 . C  ?  
ATOM   4108 O    O    . TYR TYR TYR A A 520 520 . 73.462  31.790 55.711 1.00 58.36  1 . O  ?  
ATOM   4109 CB   CB   . TYR TYR TYR A A 520 520 . 74.778  30.320 53.721 1.00 52.93  1 . C  ?  
ATOM   4110 CG   CG   . TYR TYR TYR A A 520 520 . 75.538  29.106 53.223 1.00 58.10  1 . C  ?  
ATOM   4111 CD2  CD2  . TYR TYR TYR A A 520 520 . 76.666  28.635 53.893 1.00 58.28  1 . C  ?  
ATOM   4112 CD1  CD1  . TYR TYR TYR A A 520 520 . 75.122  28.423 52.090 1.00 56.02  1 . C  ?  
ATOM   4113 CE2  CE2  . TYR TYR TYR A A 520 520 . 77.354  27.522 53.443 1.00 55.87  1 . C  ?  
ATOM   4114 CE1  CE1  . TYR TYR TYR A A 520 520 . 75.796  27.312 51.642 1.00 59.99  1 . C  ?  
ATOM   4115 CZ   CZ   . TYR TYR TYR A A 520 520 . 76.914  26.868 52.312 1.00 61.07  1 . C  ?  
ATOM   4116 OH   OH   . TYR TYR TYR A A 520 520 . 77.571  25.756 51.838 1.00 60.70  1 . O  ?  
ATOM   4117 N    N    . ILE ILE ILE A A 521 521 . 71.453  31.463 54.750 1.00 55.89  1 . N  ?  
ATOM   4118 CA   CA   . ILE ILE ILE A A 521 521 . 70.821  32.480 55.579 1.00 62.10  1 . C  ?  
ATOM   4119 C    C    . ILE ILE ILE A A 521 521 . 71.087  32.131 57.033 1.00 68.06  1 . C  ?  
ATOM   4120 O    O    . ILE ILE ILE A A 521 521 . 71.138  30.954 57.408 1.00 68.27  1 . O  ?  
ATOM   4121 CB   CB   . ILE ILE ILE A A 521 521 . 69.313  32.581 55.271 1.00 59.33  1 . C  ?  
ATOM   4122 CG1  CG1  . ILE ILE ILE A A 521 521 . 68.699  33.811 55.940 1.00 59.86  1 . C  ?  
ATOM   4123 CG2  CG2  . ILE ILE ILE A A 521 521 . 68.575  31.329 55.715 1.00 58.35  1 . C  ?  
ATOM   4124 CD1  CD1  . ILE ILE ILE A A 521 521 . 67.459  34.339 55.236 1.00 53.43  1 . C  ?  
ATOM   4125 O    O    . HIS HIS HIS A A 522 522 . 73.031  31.481 60.547 1.00 78.87  1 . O  ?  
ATOM   4126 N    N    . HIS HIS HIS A A 522 522 . 71.312  33.151 57.853 1.00 68.27  1 . N  ?  
ATOM   4127 CA   CA   . HIS HIS HIS A A 522 522 . 71.594  32.934 59.271 1.00 76.76  1 . C  ?  
ATOM   4128 C    C    . HIS HIS HIS A A 522 522 . 72.867  32.113 59.497 1.00 74.45  1 . C  ?  
ATOM   4129 CB   CB   . HIS HIS HIS A A 522 522 . 70.398  32.273 59.970 1.00 74.75  1 . C  ?  
ATOM   4130 CG   CG   . HIS HIS HIS A A 522 522 . 69.140  33.083 59.887 1.00 81.46  1 . C  ?  
ATOM   4131 ND1  ND1  . HIS HIS HIS A A 522 522 . 69.127  34.454 60.046 1.00 80.98  1 . N  ?  
ATOM   4132 CD2  CD2  . HIS HIS HIS A A 522 522 . 67.859  32.720 59.630 1.00 77.74  1 . C  ?  
ATOM   4133 CE1  CE1  . HIS HIS HIS A A 522 522 . 67.890  34.899 59.907 1.00 83.81  1 . C  ?  
ATOM   4134 NE2  NE2  . HIS HIS HIS A A 522 522 . 67.101  33.867 59.654 1.00 84.64  1 . N  ?  
ATOM   4135 O    O    . ASN ASN ASN A A 523 523 . 75.886  29.787 60.105 1.00 73.71  1 . O  ?  
ATOM   4136 N    N    . ASN ASN ASN A A 523 523 . 73.768  32.090 58.519 1.00 68.04  1 . N  ?  
ATOM   4137 CA   CA   . ASN ASN ASN A A 523 523 . 75.140  31.634 58.735 1.00 69.83  1 . C  ?  
ATOM   4138 C    C    . ASN ASN ASN A A 523 523 . 75.220  30.156 59.135 1.00 73.54  1 . C  ?  
ATOM   4139 CB   CB   . ASN ASN ASN A A 523 523 . 75.824  32.520 59.770 1.00 65.53  1 . C  ?  
ATOM   4140 CG   CG   . ASN ASN ASN A A 523 523 . 76.953  33.325 59.169 1.00 76.02  1 . C  ?  
ATOM   4141 OD1  OD1  . ASN ASN ASN A A 523 523 . 77.889  32.755 58.598 1.00 68.63  1 . O  ?  
ATOM   4142 ND2  ND2  . ASN ASN ASN A A 523 523 . 76.858  34.657 59.255 1.00 76.86  1 . N  ?  
ATOM   4143 O    O    . LEU LEU LEU A A 524 524 . 73.688  27.505 56.399 1.00 68.60  1 . O  ?  
ATOM   4144 N    N    . LEU LEU LEU A A 524 524 . 74.560  29.301 58.353 1.00 73.11  1 . N  ?  
ATOM   4145 CA   CA   . LEU LEU LEU A A 524 524 . 74.597  27.858 58.580 1.00 74.26  1 . C  ?  
ATOM   4146 C    C    . LEU LEU LEU A A 524 524 . 74.517  27.145 57.239 1.00 67.03  1 . C  ?  
ATOM   4147 CB   CB   . LEU LEU LEU A A 524 524 . 73.444  27.409 59.489 1.00 73.05  1 . C  ?  
ATOM   4148 CG   CG   . LEU LEU LEU A A 524 524 . 73.314  28.134 60.831 1.00 77.05  1 . C  ?  
ATOM   4149 CD1  CD1  . LEU LEU LEU A A 524 524 . 71.898  28.022 61.376 1.00 75.49  1 . C  ?  
ATOM   4150 CD2  CD2  . LEU LEU LEU A A 524 524 . 74.330  27.590 61.836 1.00 75.92  1 . C  ?  
ATOM   4151 O    O    . ASP ASP ASP A A 525 525 . 73.865  23.541 56.235 1.00 65.32  1 . O  ?  
ATOM   4152 N    N    . ASP ASP ASP A A 525 525 . 75.375  26.142 57.042 1.00 67.56  1 . N  ?  
ATOM   4153 CA   CA   . ASP ASP ASP A A 525 525 . 75.399  25.352 55.812 1.00 66.83  1 . C  ?  
ATOM   4154 C    C    . ASP ASP ASP A A 525 525 . 74.078  24.598 55.638 1.00 63.13  1 . C  ?  
ATOM   4155 CB   CB   . ASP ASP ASP A A 525 525 . 76.601  24.393 55.837 1.00 63.03  1 . C  ?  
ATOM   4156 CG   CG   . ASP ASP ASP A A 525 525 . 76.788  23.618 54.527 1.00 69.23  1 . C  ?  
ATOM   4157 OD1  OD1  . ASP ASP ASP A A 525 525 . 75.932  23.715 53.612 1.00 69.38  1 . O  ?  
ATOM   4158 OD2  OD2  . ASP ASP ASP A A 525 525 . 77.801  22.885 54.426 1.00 70.82  1 . O  ?  
ATOM   4159 O    O    . GLY GLY GLY A A 526 526 . 70.781  22.733 53.584 1.00 59.24  1 . O  ?  
ATOM   4160 N    N    . GLY GLY GLY A A 526 526 . 73.175  25.144 54.835 1.00 61.70  1 . N  ?  
ATOM   4161 CA   CA   . GLY GLY GLY A A 526 526 . 71.868  24.552 54.655 1.00 59.83  1 . C  ?  
ATOM   4162 C    C    . GLY GLY GLY A A 526 526 . 71.809  23.421 53.657 1.00 64.56  1 . C  ?  
ATOM   4163 O    O    . TYR TYR TYR A A 527 527 . 72.746  19.740 52.546 1.00 64.63  1 . O  ?  
ATOM   4164 N    N    . TYR TYR TYR A A 527 527 . 72.878  23.216 52.878 1.00 63.84  1 . N  ?  
ATOM   4165 CA   CA   . TYR TYR TYR A A 527 527 . 72.929  22.065 51.981 1.00 64.04  1 . C  ?  
ATOM   4166 C    C    . TYR TYR TYR A A 527 527 . 73.336  20.807 52.736 1.00 64.98  1 . C  ?  
ATOM   4167 CB   CB   . TYR TYR TYR A A 527 527 . 73.895  22.323 50.828 1.00 58.82  1 . C  ?  
ATOM   4168 CG   CG   . TYR TYR TYR A A 527 527 . 74.127  21.114 49.954 1.00 60.12  1 . C  ?  
ATOM   4169 CD1  CD1  . TYR TYR TYR A A 527 527 . 73.260  20.810 48.915 1.00 58.76  1 . C  ?  
ATOM   4170 CD2  CD2  . TYR TYR TYR A A 527 527 . 75.217  20.267 50.170 1.00 62.25  1 . C  ?  
ATOM   4171 CE1  CE1  . TYR TYR TYR A A 527 527 . 73.474  19.701 48.106 1.00 57.66  1 . C  ?  
ATOM   4172 CE2  CE2  . TYR TYR TYR A A 527 527 . 75.439  19.158 49.368 1.00 55.71  1 . C  ?  
ATOM   4173 CZ   CZ   . TYR TYR TYR A A 527 527 . 74.567  18.884 48.339 1.00 58.35  1 . C  ?  
ATOM   4174 OH   OH   . TYR TYR TYR A A 527 527 . 74.771  17.788 47.540 1.00 53.80  1 . O  ?  
ATOM   4175 N    N    . THR THR THR A A 528 528 . 74.345  20.916 53.599 1.00 66.70  1 . N  ?  
ATOM   4176 CA   CA   . THR THR THR A A 528 528 . 74.744  19.771 54.408 1.00 68.63  1 . C  ?  
ATOM   4177 C    C    . THR THR THR A A 528 528 . 73.752  19.525 55.541 1.00 68.53  1 . C  ?  
ATOM   4178 O    O    . THR THR THR A A 528 528 . 73.446  18.369 55.862 1.00 71.85  1 . O  ?  
ATOM   4179 CB   CB   . THR THR THR A A 528 528 . 76.156  19.989 54.944 1.00 65.48  1 . C  ?  
ATOM   4180 OG1  OG1  . THR THR THR A A 528 528 . 77.056  20.077 53.837 1.00 66.27  1 . O  ?  
ATOM   4181 CG2  CG2  . THR THR THR A A 528 528 . 76.572  18.838 55.830 1.00 68.68  1 . C  ?  
ATOM   4182 N    N    . HIS HIS HIS A A 529 529 . 73.225  20.597 56.143 1.00 66.19  1 . N  ?  
ATOM   4183 CA   CA   . HIS HIS HIS A A 529 529 . 72.230  20.503 57.209 1.00 68.99  1 . C  ?  
ATOM   4184 C    C    . HIS HIS HIS A A 529 529 . 70.878  21.020 56.722 1.00 69.43  1 . C  ?  
ATOM   4185 O    O    . HIS HIS HIS A A 529 529 . 70.365  22.033 57.224 1.00 63.33  1 . O  ?  
ATOM   4186 CB   CB   . HIS HIS HIS A A 529 529 . 72.706  21.265 58.447 1.00 66.83  1 . C  ?  
ATOM   4187 CG   CG   . HIS HIS HIS A A 529 529 . 73.946  20.688 59.060 1.00 78.42  1 . C  ?  
ATOM   4188 ND1  ND1  . HIS HIS HIS A A 529 529 . 73.923  19.586 59.890 1.00 81.16  1 . N  ?  
ATOM   4189 CD2  CD2  . HIS HIS HIS A A 529 529 . 75.248  21.045 58.945 1.00 76.28  1 . C  ?  
ATOM   4190 CE1  CE1  . HIS HIS HIS A A 529 529 . 75.155  19.297 60.270 1.00 76.35  1 . C  ?  
ATOM   4191 NE2  NE2  . HIS HIS HIS A A 529 529 . 75.978  20.165 59.709 1.00 77.34  1 . N  ?  
ATOM   4192 N    N    . PRO PRO PRO A A 530 530 . 70.259  20.331 55.761 1.00 66.72  1 . N  ?  
ATOM   4193 CA   CA   . PRO PRO PRO A A 530 530 . 69.059  20.892 55.122 1.00 62.34  1 . C  ?  
ATOM   4194 C    C    . PRO PRO PRO A A 530 530 . 67.875  21.093 56.054 1.00 64.06  1 . C  ?  
ATOM   4195 O    O    . PRO PRO PRO A A 530 530 . 67.052  21.972 55.782 1.00 64.40  1 . O  ?  
ATOM   4196 CB   CB   . PRO PRO PRO A A 530 530 . 68.737  19.867 54.021 1.00 63.41  1 . C  ?  
ATOM   4197 CG   CG   . PRO PRO PRO A A 530 530 . 69.454  18.614 54.416 1.00 61.48  1 . C  ?  
ATOM   4198 CD   CD   . PRO PRO PRO A A 530 530 . 70.687  19.068 55.135 1.00 62.47  1 . C  ?  
ATOM   4199 N    N    . GLU GLU GLU A A 531 531 . 67.752  20.322 57.141 1.00 68.84  1 . N  ?  
ATOM   4200 CA   CA   . GLU GLU GLU A A 531 531 . 66.468  20.250 57.840 1.00 68.02  1 . C  ?  
ATOM   4201 C    C    . GLU GLU GLU A A 531 531 . 65.972  21.619 58.306 1.00 70.18  1 . C  ?  
ATOM   4202 O    O    . GLU GLU GLU A A 531 531 . 64.756  21.827 58.427 1.00 66.85  1 . O  ?  
ATOM   4203 CB   CB   . GLU GLU GLU A A 531 531 . 66.544  19.289 59.033 1.00 66.52  1 . C  ?  
ATOM   4204 CG   CG   . GLU GLU GLU A A 531 531 . 65.432  19.547 60.067 1.00 79.87  1 . C  ?
[truncated: 55,473 more chars]
